# Supplementary material for: State-Transition Analysis of Time-Sequential Gene Expression Identifies Critical Points That Predict Development of Acute Myeloid Leukemia
Source: Oxford University Press journal article supplement (doi:10.1158/0008-5472.can-20-0354), 2020-05-15
Supplement: 00085472can200354-sup-236622_2_supp_6259938_q9mhf0.xlsx [file 00085472can200354-sup-236622_2_supp_6259938_q9mhf0.xlsx]

## Sheet: Table S1 c1vsc1s_DEG_table
Table S1 c1vsc1s_DEG_table
gene	genesym	c1_logFC	c1_qval
ENSMUSG00000000157	ITGB2L	1.989	6.83162e-08
ENSMUSG00000000318	CLEC10A	1.419	5.48105e-11
ENSMUSG00000000402	EGFL6	-3.002	1.32916e-15
ENSMUSG00000000562	ADORA3	1.977	3.2276e-18
ENSMUSG00000000903	VPREB3	-1.282	6.50131e-13
ENSMUSG00000000938	HOXA10	2.662	2.27604e-05
ENSMUSG00000000982	CCL3	-1.918	0.00731445
ENSMUSG00000001014	ICAM4	1.644	9.82202e-16
ENSMUSG00000001039	B9D1	1.172	0.000253881
ENSMUSG00000001249	HPN	1.704	2.0057e-07
ENSMUSG00000001435	COL18A1	2.514	1.43203e-10
ENSMUSG00000001506	COL1A1	-1.704	0.0215403
ENSMUSG00000001663	GSTT1	3.079	1.31111e-13
ENSMUSG00000001761	SMO	1.512	7.5808e-10
ENSMUSG00000001865	CPA3	3.349	1.32744e-24
ENSMUSG00000002190	CLGN	1.593	0.00181082
ENSMUSG00000002324	REC8	2.118	2.47126e-33
ENSMUSG00000002565	SCIN	1.239	0.00391236
ENSMUSG00000002688	PRKD1	3.579	3.37632e-09
ENSMUSG00000002771	GRIN2D	1.579	1.77993e-15
ENSMUSG00000002808	EPDR1	2.551	2.58814e-10
ENSMUSG00000003534	DDR1	1.012	5.67689e-10
ENSMUSG00000003585	SEC14L2	2.553	2.12493e-35
ENSMUSG00000003949	HLF	2.576	1.83365e-24
ENSMUSG00000004098	COL5A3	-2.642	1.23209e-16
ENSMUSG00000004558	NDRG2	1.001	0.00215114
ENSMUSG00000004562	ARHGEF40	1.344	2.19686e-10
ENSMUSG00000004668	ABCA13	1.213	0.000172142
ENSMUSG00000004814	CCL24	3.416	3.50016e-11
ENSMUSG00000005148	KLF5	-1.078	0.0331525
ENSMUSG00000005339	FCER1A	3.151	2.41465e-35
ENSMUSG00000005360	SLC1A3	3.164	3.48812e-09
ENSMUSG00000005397	NID1	1.118	1.39171e-09
ENSMUSG00000005547	CYP2A5	-2.006	0.00198093
ENSMUSG00000005672	KIT	2.148	8.97317e-24
ENSMUSG00000005800	MMP8	1.181	0.00187743
ENSMUSG00000006310	ZBTB32	1.491	2.3575e-22
ENSMUSG00000006386	TEK	2.115	2.55323e-06
ENSMUSG00000006403	ADAMTS4	-2.438	0.00104458
ENSMUSG00000006575	RUNDC3A	1.11	0.000431518
ENSMUSG00000007279	SCUBE2	2.339	2.57922e-06
ENSMUSG00000007783	CPT1C	1.128	4.8365e-05
ENSMUSG00000007908	HMGCLL1	-1.047	7.11674e-05
ENSMUSG00000008136	FHL2	-1.006	1.85253e-05
ENSMUSG00000008601	RAB25	-1.006	0.0167068
ENSMUSG00000008843	CLDN13	2.228	9.21335e-07
ENSMUSG00000008999	BMP7	1.462	1.49605e-13
ENSMUSG00000009246	TRPM5	-1.112	7.17137e-07
ENSMUSG00000009350	MPO	2.266	7.62937e-10
ENSMUSG00000009551	6330409D20RIK	-1.15	0.0105478
ENSMUSG00000009588	ST6GALNAC1	-1.489	0.014304
ENSMUSG00000010797	WNT2	6.81	6.26682e-40
ENSMUSG00000014361	MERTK	1.958	5.08936e-07
ENSMUSG00000014725	ADAM28	-1.338	0.0322906
ENSMUSG00000015222	MAP2	-1.145	1.09909e-06
ENSMUSG00000015852	FCRLS	1.818	1.36216e-09
ENSMUSG00000016382	PLS3	-1.095	0.0359274
ENSMUSG00000016386	MPPED2	2.784	3.81468e-10
ENSMUSG00000016458	WT1	1.789	0.00577759
ENSMUSG00000016494	CD34	1.518	4.6105e-09
ENSMUSG00000017009	SDC4	-1.28	3.34645e-19
ENSMUSG00000017316	PPY	1.368	0.0321926
ENSMUSG00000017723	WFDC2	-2.756	0.000548915
ENSMUSG00000018339	GPX3	1.445	1.30438e-07
ENSMUSG00000018398	2019-09-08	1.504	1.21713e-07
ENSMUSG00000018830	MYH11	1.243	0.00263969
ENSMUSG00000018844	FNDC8	1.532	0.00402075
ENSMUSG00000018930	CCL4	-2.05	0.000825887
ENSMUSG00000019027	DNAH1	-1.703	3.28263e-11
ENSMUSG00000019124	SCRN1	2.965	1.01555e-10
ENSMUSG00000019467	ARHGEF25	3.543	6.25369e-36
ENSMUSG00000019478	RAB4A	1.18	9.79618e-11
ENSMUSG00000019942	CDK1	1.231	4.03718e-08
ENSMUSG00000019987	ARG1	-1.809	0.0134793
ENSMUSG00000019989	ENPP3	-1.192	0.0433022
ENSMUSG00000019990	PDE7B	-1.209	0.0244771
ENSMUSG00000019997	CCN2	-1.755	0.0476659
ENSMUSG00000020019	NTN4	2.057	2.52175e-09
ENSMUSG00000020027	SOCS2	1.57	7.09145e-14
ENSMUSG00000020053	IGF1	2.685	3.14812e-09
ENSMUSG00000020125	ELANE	2.368	0.00101226
ENSMUSG00000020140	LGR5	-1.216	7.93399e-06
ENSMUSG00000020176	GRB10	1.487	0.00131627
ENSMUSG00000020182	DDC	1.865	4.06292e-10
ENSMUSG00000020185	E2F7	1.771	6.12942e-12
ENSMUSG00000020279	IL9R	1.337	3.26644e-17
ENSMUSG00000020383	IL13	3.79	2.30292e-24
ENSMUSG00000020481	ANKRD36	1.938	0.00141528
ENSMUSG00000020592	SDC1	-1.333	9.24161e-07
ENSMUSG00000020651	SLC26A4	-2.395	0.00382754
ENSMUSG00000020774	ASPA	-1.704	0.00849074
ENSMUSG00000020808	PIMREG	1.946	2.2779e-08
ENSMUSG00000020900	MYH10	1.23	0.00317774
ENSMUSG00000021056	TEX21	2.905	7.52323e-10
ENSMUSG00000021118	PLEK2	2.447	1.63496e-06
ENSMUSG00000021208	IFI27L2B	2.515	0.00803762
ENSMUSG00000021362	GCM2	1.433	5.56452e-13
ENSMUSG00000021587	PCSK1	1.039	1.05249e-06
ENSMUSG00000021732	FGF10	-2.363	0.013446
ENSMUSG00000021749	OIT1	-1.625	0.0388562
ENSMUSG00000021798	LDB3	-1.507	0.0495076
ENSMUSG00000021904	SEMA3G	-1.728	4.11055e-11
ENSMUSG00000022033	PBK	1.988	2.64043e-08
ENSMUSG00000022100	XPO7	1.285	2.8522e-05
ENSMUSG00000022103	GFRA2	4.414	1.74127e-45
ENSMUSG00000022122	EDNRB	2.591	1.66104e-06
ENSMUSG00000022126	ACOD1	-2.708	0.000743673
ENSMUSG00000022150	DAB2	1.637	1.19229e-07
ENSMUSG00000022157	MCPT8	1.585	6.90384e-08
ENSMUSG00000022180	SLC7A8	1.788	1.05223e-25
ENSMUSG00000022226	MCPT2	5.757	6.57952e-31
ENSMUSG00000022227	MCPT1	7.884	8.22875e-29
ENSMUSG00000022297	FZD6	1.067	0.000105913
ENSMUSG00000022303	DCSTAMP	-1.708	0.0093394
ENSMUSG00000022304	DPYS	-1.455	0.0207754
ENSMUSG00000022367	HAS2	-2.588	0.0223556
ENSMUSG00000022408	FAM83F	1.018	1.40793e-06
ENSMUSG00000022456	2019-09-03	1.17	2.36025e-06
ENSMUSG00000022468	ENDOU	-1.749	3.3051e-12
ENSMUSG00000022469	RAPGEF3	-1.129	3.41264e-08
ENSMUSG00000022512	CLDN1	-1.413	0.00197206
ENSMUSG00000022537	TMEM44	2.546	2.31352e-17
ENSMUSG00000022582	LY6G	1.628	2.30512e-05
ENSMUSG00000022598	PSCA	-1.664	0.00576149
ENSMUSG00000022623	SHANK3	1.441	0.000253829
ENSMUSG00000022755	ADGRG7	1.567	1.21713e-07
ENSMUSG00000022756	SLC7A4	1.048	0.00511477
ENSMUSG00000022883	ROBO1	2.235	3.57208e-10
ENSMUSG00000022902	STFA2	2.454	2.65876e-05
ENSMUSG00000022949	CLIC6	-2.077	0.014213
ENSMUSG00000023033	SCN8A	-1.154	4.49876e-05
ENSMUSG00000023041	KRT6B	-1.277	0.0318305
ENSMUSG00000023132	GZMA	-1.227	3.74907e-06
ENSMUSG00000023232	SERINC2	-1.28	0.0331035
ENSMUSG00000023439	GNB3	1.8	0.000680737
ENSMUSG00000023467	TULP2	1.284	0.000236084
ENSMUSG00000023571	C1QTNF12	1.59	5.23399e-28
ENSMUSG00000023992	TREM2	1.134	5.68284e-08
ENSMUSG00000024064	GALNT14	-1.769	5.80341e-09
ENSMUSG00000024109	NRXN1	-1.282	1.94018e-06
ENSMUSG00000024112	CACNA1H	-1.337	2.23187e-14
ENSMUSG00000024164	C3	1.133	8.98771e-06
ENSMUSG00000024215	SPDEF	-1.466	0.0445298
ENSMUSG00000024228	NUDT12	1.045	0.0109477
ENSMUSG00000024411	AQP4	-2.491	0.00348873
ENSMUSG00000024479	MAL2	-1.29	0.0312126
ENSMUSG00000024620	PDGFRB	1.746	3.00841e-15
ENSMUSG00000024672	MS4A7	1.436	4.65777e-08
ENSMUSG00000024680	MS4A2	3.183	1.67466e-44
ENSMUSG00000024697	GNA14	2.638	3.22369e-15
ENSMUSG00000024727	TRPM6	-1.365	0.0216515
ENSMUSG00000024738	PGA5	5.628	1.31444e-28
ENSMUSG00000024791	CDCA5	1.119	2.28825e-09
ENSMUSG00000025014	DNTT	1.064	4.87746e-08
ENSMUSG00000025150	CBR2	-1.506	0.0192484
ENSMUSG00000025189	CNNM1	4.813	2.30138e-39
ENSMUSG00000025213	KAZALD1	1.551	5.23132e-11
ENSMUSG00000025328	PADI3	3.164	9.72939e-48
ENSMUSG00000025383	IL23A	-1.881	0.0263444
ENSMUSG00000025573	6030468B19RIK	1.329	5.22317e-14
ENSMUSG00000025597	KLHL4	-1.278	1.31726e-07
ENSMUSG00000025608	PODXL	3.501	2.79606e-26
ENSMUSG00000025747	TYMS	1.001	1.0711e-07
ENSMUSG00000025813	HOMER2	1.853	2.3482e-07
ENSMUSG00000025867	CPLX2	-1.482	1.69666e-11
ENSMUSG00000025934	GSTA3	-1.596	0.0157222
ENSMUSG00000025938	SLCO5A1	-1.317	4.34158e-13
ENSMUSG00000025997	IKZF2	1.179	9.11206e-16
ENSMUSG00000026011	CTLA4	1.206	5.94114e-14
ENSMUSG00000026069	IL1RL1	3.4	8.3845e-74
ENSMUSG00000026072	IL1R1	1.048	0.00164157
ENSMUSG00000026167	WNT10A	-1.678	3.14812e-09
ENSMUSG00000026308	KLHL30	-1.866	4.97072e-07
ENSMUSG00000026327	SERPINB11	-1.232	0.0399156
ENSMUSG00000026344	LYPD1	2.1	4.48861e-05
ENSMUSG00000026411	TMEM9	1.139	5.61768e-23
ENSMUSG00000026435	SLC45A3	1.648	0.000807815
ENSMUSG00000026450	CHIT1	-1.428	0.0177704
ENSMUSG00000026463	ATP2B4	1.112	0.0168164
ENSMUSG00000026479	LAMC2	-2.532	0.00142638
ENSMUSG00000026494	KIF26B	3.708	1.02824e-26
ENSMUSG00000026535	IFI202B	-1.851	0.00571215
ENSMUSG00000026556	VANGL2	-1.018	2.85485e-11
ENSMUSG00000026614	SLC30A10	2.991	7.07438e-11
ENSMUSG00000026669	MCM10	1.063	0.00101825
ENSMUSG00000026712	MRC1	1.612	7.7322e-11
ENSMUSG00000026748	PLXDC2	1.068	0.000322842
ENSMUSG00000026833	OLFM1	1.064	6.60267e-06
ENSMUSG00000026835	FCNB	1.819	5.3908e-05
ENSMUSG00000026837	COL5A1	4.397	1.48193e-45
ENSMUSG00000026921	EGFL7	3.036	2.19504e-26
ENSMUSG00000026955	SAPCD2	1.182	0.00301624
ENSMUSG00000026971	ITGB6	-2.122	0.00304825
ENSMUSG00000026981	IL1RN	-1.375	0.0046701
ENSMUSG00000026984	IL1F6	-1.541	0.0165507
ENSMUSG00000026985	IL1F8	-1.648	0.0258912
ENSMUSG00000027075	SLC43A1	1.008	0.00706281
ENSMUSG00000027202	SLC12A1	3.39	2.30716e-15
ENSMUSG00000027358	BMP2	-2.33	6.27581e-05
ENSMUSG00000027377	MALL	-1.232	0.0388307
ENSMUSG00000027399	IL1A	-1.285	0.0432779
ENSMUSG00000027525	PHACTR3	-1.843	5.37985e-09
ENSMUSG00000027555	CAR13	1.195	8.97265e-06
ENSMUSG00000027556	CAR1	2.951	7.3807e-13
ENSMUSG00000027611	PROCR	-2.042	0.0423692
ENSMUSG00000027669	GNB4	1.543	5.67279e-32
ENSMUSG00000027737	SLC7A11	-1.223	0.0246199
ENSMUSG00000027895	KCNC4	4.196	4.03995e-22
ENSMUSG00000028037	IFI44	1.038	2.01296e-05
ENSMUSG00000028128	F3	-2.1	0.0106862
ENSMUSG00000028185	DNASE2B	1.223	1.03769e-05
ENSMUSG00000028195	CCN1	-1.263	0.0339537
ENSMUSG00000028289	EPHA7	1.483	1.15964e-05
ENSMUSG00000028341	NR4A3	-1.628	0.00381155
ENSMUSG00000028354	FMN2	-1.628	7.61714e-05
ENSMUSG00000028469	NPR2	1.858	1.47204e-17
ENSMUSG00000028524	SGIP1	1.565	1.3894e-05
ENSMUSG00000028528	DNAJC6	1.422	3.70901e-20
ENSMUSG00000028644	ERMAP	1.693	0.00017074
ENSMUSG00000028678	KIF2C	1.068	0.00086919
ENSMUSG00000028766	ALPL	-1.224	0.0395557
ENSMUSG00000028801	STPG1	-1.002	0.0359739
ENSMUSG00000028825	RHD	1.275	0.0211762
ENSMUSG00000028836	SLC30A2	4.487	2.49768e-43
ENSMUSG00000029086	PROM1	-2	0.00277968
ENSMUSG00000029154	CWH43	-1.791	0.0101628
ENSMUSG00000029189	SEL1L3	-1.375	0.00595529
ENSMUSG00000029314	GPAT3	-1.118	5.29989e-10
ENSMUSG00000029371	CXCL5	-1.739	0.0145663
ENSMUSG00000029379	CXCL3	-2.385	0.00882303
ENSMUSG00000029596	SDSL	2.914	5.61635e-13
ENSMUSG00000029669	TSPAN12	-1.474	0.0466068
ENSMUSG00000029716	TFR2	2.215	2.79799e-26
ENSMUSG00000029814	IGF2BP3	-1.196	0.00215153
ENSMUSG00000029866	KEL	1.134	0.0481131
ENSMUSG00000029913	PRDM5	-1.288	0.0321119
ENSMUSG00000030017	REG3G	-2.865	0.0123326
ENSMUSG00000030048	GKN3	5.774	1.09062e-40
ENSMUSG00000030069	PROK2	2.932	4.15044e-05
ENSMUSG00000030075	CNTN3	2.573	7.04913e-08
ENSMUSG00000030109	SLC6A12	-1.049	0.000828759
ENSMUSG00000030117	GDF3	1.894	2.2749e-17
ENSMUSG00000030142	CLEC4E	-1.137	0.0212064
ENSMUSG00000030147	CLEC4B1	1.268	7.39686e-08
ENSMUSG00000030178	KLRA13-PS	-1.03	8.15002e-10
ENSMUSG00000030303	FAR2	1.759	4.03718e-08
ENSMUSG00000030413	PGLYRP1	-1.243	0.00604214
ENSMUSG00000030510	CERS3	-1.373	0.0149801
ENSMUSG00000030559	RAB38	1.788	2.2776e-09
ENSMUSG00000030584	DPF1	2.699	1.3326e-13
ENSMUSG00000030650	TMC5	-2.1	0.0149801
ENSMUSG00000030664	SOX6OS	3.066	9.62154e-13
ENSMUSG00000030693	KLK10	-1.289	0.0456912
ENSMUSG00000030825	HSD17B14	-1.259	0.0423324
ENSMUSG00000030954	GP2	-2.933	0.00654727
ENSMUSG00000031004	MKI67	1.01	0.0132399
ENSMUSG00000031089	SLC6A14	-1.309	0.0248975
ENSMUSG00000031098	SYT8	-1.037	0.0398559
ENSMUSG00000031119	GPC4	-1.352	0.00849074
ENSMUSG00000031274	COL4A5	-1.066	0.000207896
ENSMUSG00000031342	GPM6B	-1.182	0.0338461
ENSMUSG00000031375	BGN	-1.654	0.038033
ENSMUSG00000031382	ASB11	-1.213	0.0319371
ENSMUSG00000031495	CD209D	1.555	7.77708e-11
ENSMUSG00000031538	PLAT	-1.502	0.0203345
ENSMUSG00000031565	FGFR1	1.204	3.30699e-11
ENSMUSG00000031613	HPGD	-1.02	1.17232e-08
ENSMUSG00000031616	EDNRA	3.972	4.09663e-24
ENSMUSG00000031727	PMFBP1	2.28	0.000357798
ENSMUSG00000031780	CCL17	1.679	0.000111789
ENSMUSG00000031786	DRC7	1.637	6.21997e-07
ENSMUSG00000031842	PDE4C	-1.318	1.22556e-11
ENSMUSG00000031877	CES2G	1.62	6.49999e-05
ENSMUSG00000031893	TSNAXIP1	-1.329	2.49289e-07
ENSMUSG00000031933	IZUMO1R	1.061	1.03576e-09
ENSMUSG00000032023	JHY	-1.261	0.0426347
ENSMUSG00000032126	HMBS	1.115	0.00083004
ENSMUSG00000032135	MCAM	1.018	0.00087204
ENSMUSG00000032186	TMOD2	1.718	8.56715e-10
ENSMUSG00000032221	MNS1	1.405	4.10724e-21
ENSMUSG00000032484	NGP	3.253	2.33489e-17
ENSMUSG00000032487	PTGS2	-2.418	0.000686178
ENSMUSG00000032496	LTF	-1.557	0.0160793
ENSMUSG00000032578	CISH	1.248	1.0491e-12
ENSMUSG00000032773	CHRM1	3.343	1.84399e-11
ENSMUSG00000032783	TROAP	1.294	1.34968e-06
ENSMUSG00000032818	LOXHD1	-1.669	2.73771e-12
ENSMUSG00000033207	MAMDC2	1.488	1.89547e-06
ENSMUSG00000033213	AA467197	-1.149	0.0387337
ENSMUSG00000033581	IGF2BP2	-1.746	0.00118975
ENSMUSG00000033688	1300017J02RIK	1.41	0.00570851
ENSMUSG00000034059	YPEL4	1.775	8.39997e-05
ENSMUSG00000034362	CSTA1	-1.176	0.0467875
ENSMUSG00000034435	TMEM30B	-1.225	0.0405148
ENSMUSG00000034607	POF1B	-1.141	0.0493292
ENSMUSG00000034687	FRAS1	2.868	1.13061e-18
ENSMUSG00000034773	BC030867	1.897	4.14999e-08
ENSMUSG00000034825	NRIP3	1.621	3.76474e-06
ENSMUSG00000034842	ART3	1.083	5.73204e-07
ENSMUSG00000034871	FAM151A	3.739	1.64241e-27
ENSMUSG00000034990	OTOA	1.515	1.18961e-09
ENSMUSG00000035283	ADRB1	-1.104	5.04962e-06
ENSMUSG00000035385	CCL2	2.032	2.49898e-07
ENSMUSG00000035451	FOXA1	-1.462	0.0280612
ENSMUSG00000035504	REEP6	1.266	0.0157719
ENSMUSG00000035594	CHRNA5	4.222	5.26099e-23
ENSMUSG00000035692	ISG15	1.307	0.00386353
ENSMUSG00000035861	TMPRSS11B	-1.425	0.0283977
ENSMUSG00000036027	1810046K07RIK	2.23	2.98127e-21
ENSMUSG00000036103	COLEC12	1.636	5.66038e-10
ENSMUSG00000036172	CD200R3	1.695	3.30975e-17
ENSMUSG00000036295	LRRN3	-1.285	0.0244605
ENSMUSG00000036381	P2RY14	1.52	5.35916e-19
ENSMUSG00000036412	ARSI	1.009	8.3974e-06
ENSMUSG00000036459	WTIP	2.743	2.63674e-14
ENSMUSG00000036473	TBC1D24	1.141	3.60395e-12
ENSMUSG00000036814	SLC6A20A	1.166	0.0309158
ENSMUSG00000036863	SYDE2	1.441	4.70994e-17
ENSMUSG00000037225	FGF2	1.938	2.14051e-08
ENSMUSG00000037437	ADAM32	-1.236	0.0400022
ENSMUSG00000037440	VNN1	-1.257	0.0322906
ENSMUSG00000037474	DTL	1.188	3.69662e-10
ENSMUSG00000037482	ERV3	2.692	2.84813e-07
ENSMUSG00000037605	ADGRL3	1.84	3.56593e-17
ENSMUSG00000037762	SLC16A9	1.595	0.000340591
ENSMUSG00000037852	CPE	-1.288	0.0349858
ENSMUSG00000037974	MUC5AC	-2.306	0.0372117
ENSMUSG00000037989	WNK2	-1.246	0.00334196
ENSMUSG00000038020	RAPGEFL1	-1.231	1.26003e-08
ENSMUSG00000038067	CSF3	-1.307	0.0494084
ENSMUSG00000038094	ATP13A4	-1.293	0.0332575
ENSMUSG00000038227	HOXA9	1.893	4.87711e-05
ENSMUSG00000038357	CAMP	2.974	7.2108e-17
ENSMUSG00000038403	HFE2	3.765	1.0211e-19
ENSMUSG00000038418	EGR1	-1.028	0.0159365
ENSMUSG00000038463	OLFML2B	1.26	0.000705678
ENSMUSG00000038587	AKAP12	-1.583	6.64889e-21
ENSMUSG00000038630	ZKSCAN16	-1.057	0.00012362
ENSMUSG00000038670	MYBPC2	-1.09	1.13537e-08
ENSMUSG00000038725	PKHD1L1	1.907	1.02205e-05
ENSMUSG00000038764	PTPN3	-1.108	0.0322906
ENSMUSG00000038879	NIPAL2	-1.483	0.0403474
ENSMUSG00000038997	ASB17	3.649	1.28674e-16
ENSMUSG00000039013	SIGLECF	1.16	1.89547e-06
ENSMUSG00000039084	CHAD	-1.925	0.000793767
ENSMUSG00000039115	ITGA9	1.759	1.76498e-28
ENSMUSG00000039167	ADGRL4	1.091	2.12043e-06
ENSMUSG00000039481	NRTN	2.994	5.52362e-16
ENSMUSG00000039518	CDSN	-1.863	0.0378273
ENSMUSG00000039529	ATP8B1	-1.21	0.0303403
ENSMUSG00000040046	TPH1	5.501	3.23001e-27
ENSMUSG00000040147	MAOB	2.801	2.15178e-17
ENSMUSG00000040183	ANKRD6	1.118	8.56934e-07
ENSMUSG00000040204	PCLAF	1.452	1.29701e-10
ENSMUSG00000040314	CTSG	1.918	1.74214e-07
ENSMUSG00000040329	IL7	-1.325	0.0318305
ENSMUSG00000040605	BACE2	-1.152	0.0429141
ENSMUSG00000040732	ERG	2.608	2.41634e-34
ENSMUSG00000040809	CHIL3	1.518	1.7689e-06
ENSMUSG00000040950	MGL2	1.742	5.83469e-09
ENSMUSG00000040957	CABLES1	1.145	1.9996e-08
ENSMUSG00000041064	PIF1	1.232	1.7093e-05
ENSMUSG00000041117	CCDC8	1.431	5.53017e-08
ENSMUSG00000041134	CYYR1	2.154	1.44045e-05
ENSMUSG00000041329	ATP1B2	2.083	2.98565e-11
ENSMUSG00000041431	CCNB1	1.104	1.07863e-07
ENSMUSG00000041696	RASL12	-1.072	8.04892e-05
ENSMUSG00000041707	TMEM273	1.449	3.99385e-07
ENSMUSG00000041984	RPTN	-3.593	0.0121682
ENSMUSG00000042155	KLHL23	1.675	5.22317e-14
ENSMUSG00000042212	SPRR2D	-3.102	0.0126844
ENSMUSG00000042250	PGLYRP4	-1.158	0.0474533
ENSMUSG00000042268	SLC26A9	-1.99	0.00462697
ENSMUSG00000042622	MAFF	-1.163	0.0261932
ENSMUSG00000042684	NPL	2.595	3.3332e-32
ENSMUSG00000042751	NMNAT2	1.181	1.36216e-09
ENSMUSG00000042784	MUC1	-1.171	0.03019
ENSMUSG00000042807	HECW2	-1.312	0.000420332
ENSMUSG00000042845	WFDC12	-2.295	0.0322578
ENSMUSG00000043243	FAM129C	-1.338	5.63254e-14
ENSMUSG00000043557	MDGA1	-1.104	0.0423692
ENSMUSG00000043635	ADAMTS3	1.335	7.48217e-06
ENSMUSG00000043639	RBM20	1.09	0.00274174
ENSMUSG00000043705	CAPN13	-1.312	0.0479443
ENSMUSG00000043727	F830045P16RIK	1.254	0.00125738
ENSMUSG00000043822	ADAMTSL5	2.628	4.78305e-10
ENSMUSG00000043932	KLRI2	-1.571	6.87573e-11
ENSMUSG00000043953	CCRL2	-2.141	0.00143436
ENSMUSG00000044005	GLS2	1.866	4.42206e-05
ENSMUSG00000044026	SLC35G1	1.299	3.878e-20
ENSMUSG00000044165	BCL2L15	-1.232	0.0134899
ENSMUSG00000044220	NKX2-3	2.827	1.71799e-07
ENSMUSG00000044303	CDKN2A	1.273	0.00521157
ENSMUSG00000044313	MAB21L3	-1.63	0.0378273
ENSMUSG00000044338	APLNR	1.202	9.92846e-06
ENSMUSG00000044352	SOWAHA	1.126	0.0458992
ENSMUSG00000044393	DSG2	-1.632	0.00986782
ENSMUSG00000044534	ACKR2	1.137	5.69975e-12
ENSMUSG00000044748	DEFB1	-1.335	0.01794
ENSMUSG00000044749	ABCA6	-1.215	1.68586e-09
ENSMUSG00000045404	KCNK13	-1.152	2.06414e-06
ENSMUSG00000045502	HCAR2	-1.504	0.0112489
ENSMUSG00000045509	GPR150	1.282	0.000136548
ENSMUSG00000045539	SPRR3	-3.637	0.0117197
ENSMUSG00000045608	DBX2	4.846	2.10088e-28
ENSMUSG00000045667	SMTNL2	2.208	2.99141e-11
ENSMUSG00000045672	COL27A1	-1.008	4.46127e-10
ENSMUSG00000045928	4933440M02RIK	1.048	0.000169386
ENSMUSG00000046182	GSG1L	3.998	4.49878e-38
ENSMUSG00000046203	SPRR2G	-3.268	0.0139587
ENSMUSG00000046337	FAM178B	4.086	1.21881e-21
ENSMUSG00000046354	DEFB14	-1.5	0.0465764
ENSMUSG00000046402	RBP1	-1.588	0.00800359
ENSMUSG00000046490	RNF222	1.724	0.000697423
ENSMUSG00000046523	KCTD4	-2.599	0.0030915
ENSMUSG00000047037	NIPA1	1.012	0.0307862
ENSMUSG00000047115	FAM221A	1.24	1.30509e-09
ENSMUSG00000047361	GM973	2.221	2.40665e-25
ENSMUSG00000047394	ODF3B	1.875	2.6885e-07
ENSMUSG00000047443	ERFE	2.258	2.54624e-11
ENSMUSG00000047586	NCCRP1	-1.312	0.023494
ENSMUSG00000047730	FCGBP	-1.409	0.0289328
ENSMUSG00000047844	BEX4	3.578	1.87047e-13
ENSMUSG00000047884	KLK9	-1.859	0.0120027
ENSMUSG00000047907	TSHZ2	-1.283	0.0405249
ENSMUSG00000047990	C2CD4A	5.767	2.50724e-31
ENSMUSG00000048217	NAGS	3.618	3.28836e-14
ENSMUSG00000048284	TAS2R126	-1.085	0.00455997
ENSMUSG00000048399	TPRG	-1.431	0.0377072
ENSMUSG00000048442	SMIM5	1.522	1.87819e-24
ENSMUSG00000048458	INKA2	1.081	1.15229e-10
ENSMUSG00000048503	TMEM136	1.214	1.61203e-06
ENSMUSG00000048537	PHLDB1	1.082	2.55187e-11
ENSMUSG00000048794	CFAP100	3.568	2.90114e-21
ENSMUSG00000048814	LONRF2	4.057	9.48965e-21
ENSMUSG00000049134	NRAP	1.028	0.00449147
ENSMUSG00000049350	ZG16	2.667	2.82826e-08
ENSMUSG00000049404	RARRES1	3.747	1.87291e-17
ENSMUSG00000049511	HTR1B	-1.153	0.00291398
ENSMUSG00000049687	PHETA2	1.327	1.37926e-14
ENSMUSG00000050157	GM867	1.47	0.00477645
ENSMUSG00000050359	SPRR1A	-2.168	0.012314
ENSMUSG00000050390	C77080	1.263	0.00448019
ENSMUSG00000050534	HTR5B	1.373	0.0273546
ENSMUSG00000050578	MMP13	1.622	0.000622123
ENSMUSG00000050635	SPRR2F	-2.882	0.0043252
ENSMUSG00000050747	TRIM15	-2.085	0.0210101
ENSMUSG00000051065	MB21D2	1.662	0.000680737
ENSMUSG00000051159	CITED1	2.752	1.78579e-08
ENSMUSG00000051331	CACNA1C	1.174	0.0155516
ENSMUSG00000051378	KIF18B	1.2	0.000345481
ENSMUSG00000051855	MEST	-1.153	0.0418617
ENSMUSG00000051934	SPATS2	-1.316	0.0182941
ENSMUSG00000052373	MPP3	1.499	0.0164153
ENSMUSG00000052560	CPNE8	-1.262	0.0370116
ENSMUSG00000052698	TLN2	1.408	0.00222097
ENSMUSG00000052852	REEP1	1.198	0.00877749
ENSMUSG00000052955	CPVL	3.699	2.33411e-19
ENSMUSG00000052974	CYP2F2	-2.232	0.00829574
ENSMUSG00000053054	ADH6A	-1.26	0.0361029
ENSMUSG00000053080	2700081O15RIK	-1.233	1.3458e-09
ENSMUSG00000053166	CDH22	-1.266	3.41233e-05
ENSMUSG00000054191	KLF1	3.148	3.77555e-18
ENSMUSG00000054325	LCE3A	-1.486	0.0105872
ENSMUSG00000054537	TMPRSS11E	-1.602	0.029379
ENSMUSG00000054793	CADM4	-1.289	0.0127047
ENSMUSG00000054951	9130008F23RIK	-1.148	0.0192045
ENSMUSG00000054999	NAALADL1	1.707	0.000128014
ENSMUSG00000055312	THEM7	1.208	0.0370075
ENSMUSG00000055409	NELL1	-2.734	0.0495832
ENSMUSG00000055737	GHR	-1.252	0.0442186
ENSMUSG00000055980	IRS1	-1.308	9.80867e-05
ENSMUSG00000056174	COL8A2	-2.215	8.95664e-11
ENSMUSG00000057092	FXYD3	-1.492	0.0486603
ENSMUSG00000057729	PRTN3	1.202	0.000846749
ENSMUSG00000058174	GM5148	-1.195	0.0487554
ENSMUSG00000058183	MMEL1	1.528	0.0085101
ENSMUSG00000058354	KRT6A	-1.294	0.0482191
ENSMUSG00000058427	CXCL2	-3.311	0.000427988
ENSMUSG00000058626	CAPN11	-3.265	8.93798e-05
ENSMUSG00000058773	HIST1H1B	1.331	1.5656e-13
ENSMUSG00000059901	ADAMTS14	-1.412	3.73551e-11
ENSMUSG00000060147	SERPINB6A	-1.221	0.0273699
ENSMUSG00000061068	MCPT4	3.906	1.98873e-15
ENSMUSG00000061259	TMPRSS11D	-2.177	0.0119722
ENSMUSG00000061353	CXCL12	2.962	2.06898e-12
ENSMUSG00000061991	HIST1H2AF	2.056	5.51186e-17
ENSMUSG00000062046	5730460C07RIK	2.832	5.22317e-14
ENSMUSG00000062524	NCR1	-1.399	1.90423e-07
ENSMUSG00000062661	NCS1	2.399	2.6769e-24
ENSMUSG00000062727	HIST1H2BK	1.834	1.26024e-18
ENSMUSG00000063651	CNFN	-1.442	0.0231569
ENSMUSG00000063767	S100A7A	-1.185	0.0436818
ENSMUSG00000063903	KLK1	-1.581	0.000812618
ENSMUSG00000064168	NA	1.154	5.05693e-12
ENSMUSG00000064330	PDE6H	-1.245	0.00873503
ENSMUSG00000064337	MT-RNR1	-1.924	0.00164447
ENSMUSG00000064339	MT-RNR2	-1.782	0.00356228
ENSMUSG00000064368	MT-ND6	-1.348	0.00701725
ENSMUSG00000064372	MT-TP	-1.208	0.0299275
ENSMUSG00000064945	RNY3	-1.561	0.0085101
ENSMUSG00000065822	SNORD15A	-1.048	0.0385405
ENSMUSG00000066108	MUC5B	-2.931	0.00728876
ENSMUSG00000066867	OAS1E	2.414	2.61622e-11
ENSMUSG00000067614	KRT86	-1.066	0.00773292
ENSMUSG00000067629	SYNGAP1	1.133	3.64577e-16
ENSMUSG00000068079	TCF15	2.036	0.000494749
ENSMUSG00000068744	PSRC1	1.11	1.17802e-05
ENSMUSG00000069267	HIST1H3B	1.261	3.54366e-05
ENSMUSG00000069274	HIST1H4F	1.519	4.23056e-20
ENSMUSG00000069302	HIST1H2AH	2.3	1.22022e-15
ENSMUSG00000069310	HIST1H3C	1.708	2.18555e-15
ENSMUSG00000070063	SNORA33	-1.093	0.00629198
ENSMUSG00000070526	PEG12	1.158	0.00182358
ENSMUSG00000071226	CECR2	-1.525	1.489e-15
ENSMUSG00000071547	NT5DC2	1.612	4.0344e-14
ENSMUSG00000071561	BC100530	-1.419	0.0163823
ENSMUSG00000071714	CSF2RB2	1.537	9.96972e-15
ENSMUSG00000071722	SPIN4	1.707	0.000154304
ENSMUSG00000072573	GM10369	-1.487	0.00521157
ENSMUSG00000072721	KLRA14-PS	-1.791	7.76981e-07
ENSMUSG00000072812	AHNAK2	1.584	1.38731e-07
ENSMUSG00000072845	TMPRSS11A	-1.873	0.0096461
ENSMUSG00000073295	NUDT11	3.076	1.27191e-10
ENSMUSG00000073418	C4B	3.205	1.63437e-16
ENSMUSG00000074039	4930520O04RIK	1.167	1.88352e-05
ENSMUSG00000074195	CLCA4B	-2.351	0.00140389
ENSMUSG00000074259	GRAMD2	1.523	8.70301e-08
ENSMUSG00000074892	B3GALT5	-1.447	0.0209293
ENSMUSG00000074923	PAK6	1.016	1.19899e-05
ENSMUSG00000075334	RPRM	3.392	5.25982e-16
ENSMUSG00000075420	SMIM6	1.24	1.35701e-07
ENSMUSG00000075592	NYNRIN	1.054	2.8727e-09
ENSMUSG00000076467	TRBV13-1	1.023	8.09931e-08
ENSMUSG00000076534	IGKV12-89	1.388	2.29118e-06
ENSMUSG00000076745	TCRG-V4	1.029	2.06726e-05
ENSMUSG00000076749	TCRG-C1	1.098	5.00896e-09
ENSMUSG00000076752	TCRG-C2	1.094	8.99485e-11
ENSMUSG00000076754	TRGV2	1.202	3.30699e-11
ENSMUSG00000076757	TCRG-C4	1.007	5.34047e-08
ENSMUSG00000076918	TRAJ11	1.048	1.44099e-05
ENSMUSG00000077714	SNORD17	-1.209	0.0305329
ENSMUSG00000078350	SMIM1	1.429	0.00012516
ENSMUSG00000078521	AUNIP	1.648	3.70475e-09
ENSMUSG00000078597	CYP4A12B	-1.595	0.0183482
ENSMUSG00000079298	KLRB1B	-1.376	2.063e-07
ENSMUSG00000079652	FAM71F2	-1.041	0.0342802
ENSMUSG00000079654	PRRT4	2.526	1.22248e-14
ENSMUSG00000079852	KLRA4	-2.364	1.07951e-14
ENSMUSG00000080575	MIR1190	-1.227	0.00047206
ENSMUSG00000081564	GM13717	1.1	0.0163114
ENSMUSG00000081657	GM15466	-1.656	0.000206787
ENSMUSG00000083165	GM11344	-1.036	0.000109213
ENSMUSG00000083282	CTSF	1.263	0.0162262
ENSMUSG00000083579	GM15538	-1.02	0.00285458
ENSMUSG00000084807	GM13073	-1.043	0.00589281
ENSMUSG00000085447	9530026F06RIK	-3.179	0.00149442
ENSMUSG00000085457	1110046J04RIK	-1.411	0.0413323
ENSMUSG00000085558	4930412C18RIK	1.792	1.51827e-06
ENSMUSG00000085666	GM9855	1.495	5.13008e-05
ENSMUSG00000086199	BCAS3OS1	-1.218	0.0443131
ENSMUSG00000086391	1700042O10RIK	3.935	2.62082e-21
ENSMUSG00000086425	F730016J06RIK	1.988	7.02752e-08
ENSMUSG00000086534	GM16758	3.289	2.44083e-11
ENSMUSG00000086560	GM13372	2.622	4.03718e-08
ENSMUSG00000086596	SUSD5	-1.498	0.0396115
ENSMUSG00000087038	2900079G21RIK	-1.446	0.021716
ENSMUSG00000087340	GM15228	1.29	7.07438e-11
ENSMUSG00000087611	4930458D05RIK	-1.26	4.6159e-09
ENSMUSG00000087684	1200007C13RIK	-1.182	0.031634
ENSMUSG00000089727	KLRA8	-2.048	1.27276e-12
ENSMUSG00000089766	GM16538	1.293	2.30652e-07
ENSMUSG00000090113	NHLRC4	1.201	0.0172131
ENSMUSG00000090336	CFAP97D2	-1.208	0.0320335
ENSMUSG00000090588	GM9573	-1.17	0.0359274
ENSMUSG00000090863	A530084C06RIK	1.546	6.08885e-09
ENSMUSG00000091577	GM6211	3.842	2.9465e-18
ENSMUSG00000092130	D030025P21RIK	-1.388	0.0325888
ENSMUSG00000092250	GM20467	1.816	0.00394306
ENSMUSG00000092683	GM25747	-2.817	2.93912e-05
ENSMUSG00000092748	GM22175	-1.54	0.00516077
ENSMUSG00000093153	GM25033	-3.781	1.99508e-06
ENSMUSG00000094377	GM24407	-1.067	0.0272292
ENSMUSG00000095105	EDARADD	-1.06	9.1889e-10
ENSMUSG00000095574	TRBV12-1	1.006	7.2379e-08
ENSMUSG00000096108	IGHV11-2	1.325	6.56839e-11
ENSMUSG00000096215	SMIM22	-1.635	0.0445552
ENSMUSG00000096243	GM24265	-1.22	0.0363363
ENSMUSG00000096351	SAMD11	1.447	0.00249132
ENSMUSG00000096807	NA	1.671	1.71776e-19
ENSMUSG00000096883	SHISA8	-1.43	6.08885e-09
ENSMUSG00000096982	REDRUM	1.628	0.00252965
ENSMUSG00000097310	A930038B10RIK	1.267	0.00570851
ENSMUSG00000097331	F420014N23RIK	1.078	0.00117819
ENSMUSG00000097440	GM6277	1.6	0.00106526
ENSMUSG00000097754	PTGS2OS2	-1.62	0.00340574
ENSMUSG00000098803	GM27468	-1.464	0.00957155
ENSMUSG00000098973	MIR6236	-1.602	0.0090444
ENSMUSG00000099105	MIR7007	2.39	4.03283e-07
ENSMUSG00000099370	PLATR10	-1.034	5.02475e-05
ENSMUSG00000099517	HIST1H3G	2.1	2.95055e-12
ENSMUSG00000099954	GM28112	1.125	2.00534e-06
ENSMUSG00000100147	1700047M11RIK	1.949	9.14309e-07
ENSMUSG00000100354	GM29113	3.047	8.09751e-30
ENSMUSG00000100815	GM29112	1.105	7.51423e-05
ENSMUSG00000102099	1700011B04RIK	-2.106	0.00679227
ENSMUSG00000102158	GM34342	-1.217	0.0195895
ENSMUSG00000102202	GM33280	1.793	3.71157e-15
ENSMUSG00000102349	GM37376	-1.068	0.0098582
ENSMUSG00000102795	GM6236	-1.226	0.00534579
ENSMUSG00000103130	F830212C03RIK	4.14	2.94859e-16
ENSMUSG00000103183	GM37090	1.384	2.33018e-10
ENSMUSG00000103560	GM38070	2.047	1.26495e-07
ENSMUSG00000103636	GM38331	1.985	1.99447e-08
ENSMUSG00000103788	GM37527	2.832	3.45682e-11
ENSMUSG00000103907	GM37498	-1.867	0.00389912
ENSMUSG00000103995	5730488B01RIK	-1.031	2.06291e-06
ENSMUSG00000104435	GM37422	1.177	8.78488e-05
ENSMUSG00000104509	GM33994	1.021	1.25214e-05
ENSMUSG00000104735	C130075A20RIK	1.711	0.00866788
ENSMUSG00000104955	1700016F12RIK	4.323	7.67829e-20
ENSMUSG00000105128	GM42870	-1.063	2.19651e-09
ENSMUSG00000105437	GM42450	1.481	0.00107421
ENSMUSG00000105439	A230098N10RIK	2.559	1.04633e-08
ENSMUSG00000105926	GM43386	2.07	2.62802e-16
ENSMUSG00000106031	GM8848	-1.665	3.49335e-08
ENSMUSG00000106321	GM43674	-1.361	0.0301449
ENSMUSG00000106325	IGHV8-10	-1.824	1.94185e-06
ENSMUSG00000106355	N-TSAGA9	-2.131	0.00150959
ENSMUSG00000106438	GM32051	1.947	1.41357e-05
ENSMUSG00000106515	GM30382	1.586	1.99432e-07
ENSMUSG00000106567	2010309G21RIK	-1.109	1.97203e-11
ENSMUSG00000106588	GM17590	3.483	4.93877e-22
ENSMUSG00000106668	IGLJ1	-1.183	5.61541e-07

## Sheet: Table S2 c2vsc1s_DEG_table
Table S2 c2vsc1s_DEG_table
gene	genesym	c2_logFC	c2_qval
ENSMUSG00000000028	CDC45	2.681	4.32096e-50
ENSMUSG00000000120	NGFR	-1.432	0.000657854
ENSMUSG00000000142	AXIN2	1.364	2.21866e-08
ENSMUSG00000000184	CCND2	1.368	4.39925e-09
ENSMUSG00000000301	PEMT	1.393	1.90475e-06
ENSMUSG00000000326	COMT	2.194	4.85707e-32
ENSMUSG00000000402	EGFL6	-2.61	0.00435503
ENSMUSG00000000416	CTTNBP2	5.412	7.41192e-07
ENSMUSG00000000555	ITGA5	1.011	0.0280678
ENSMUSG00000000562	ADORA3	3.301	6.50047e-18
ENSMUSG00000000732	ICOSL	-1.202	0.000375436
ENSMUSG00000000869	IL4	2.764	4.60229e-06
ENSMUSG00000000901	MMP11	-1.293	0.00663532
ENSMUSG00000000903	VPREB3	-2.171	1.20364e-06
ENSMUSG00000000915	HIP1R	-1.33	2.86271e-06
ENSMUSG00000000938	HOXA10	8.397	2.85284e-26
ENSMUSG00000000957	MMP14	2.364	0.000460007
ENSMUSG00000001014	ICAM4	4.359	3.87738e-48
ENSMUSG00000001039	B9D1	2.428	5.49046e-06
ENSMUSG00000001056	NHP2	1.364	2.724e-16
ENSMUSG00000001123	LGALS9	1.406	2.38586e-13
ENSMUSG00000001228	UHRF1	3.69	2.80841e-49
ENSMUSG00000001247	LSR	-1.235	0.0305333
ENSMUSG00000001249	HPN	3.731	5.93572e-13
ENSMUSG00000001313	RND2	1.329	0.00807647
ENSMUSG00000001333	SYNC	2.445	0.0161499
ENSMUSG00000001380	HARS	1.287	4.79299e-22
ENSMUSG00000001416	CCT3	1.087	2.38175e-06
ENSMUSG00000001435	COL18A1	2.759	0.000365952
ENSMUSG00000001436	SLC19A1	1.353	3.03617e-13
ENSMUSG00000001482	DEF8	1.622	3.06414e-16
ENSMUSG00000001517	FOXM1	2.325	4.18922e-38
ENSMUSG00000001525	TUBB5	1.374	2.57978e-13
ENSMUSG00000001663	GSTT1	2.817	0.000681613
ENSMUSG00000001707	EEF1E1	1.391	8.18707e-13
ENSMUSG00000001761	SMO	5.961	5.5217e-75
ENSMUSG00000001865	CPA3	5.654	7.84359e-25
ENSMUSG00000001901	KCNH6	-1.57	0.0438478
ENSMUSG00000001986	GRIA3	1.167	0.000346966
ENSMUSG00000001999	BLVRA	1.15	1.96717e-10
ENSMUSG00000002007	SRPK3	-1.739	4.89812e-05
ENSMUSG00000002083	BBC3	1.085	6.68618e-09
ENSMUSG00000002190	CLGN	6.425	7.42387e-20
ENSMUSG00000002274	METRN	1.077	7.32225e-09
ENSMUSG00000002297	DBF4	1.207	8.40585e-14
ENSMUSG00000002324	REC8	2.924	1.06405e-19
ENSMUSG00000002343	ARMC6	1.363	5.47779e-17
ENSMUSG00000002346	SLC25A42	1.034	4.38178e-07
ENSMUSG00000002365	SNX9	-1.079	3.11615e-07
ENSMUSG00000002477	SNRPD1	1.483	4.2407e-16
ENSMUSG00000002688	PRKD1	7.511	1.57704e-22
ENSMUSG00000002771	GRIN2D	3.883	1.21129e-36
ENSMUSG00000002808	EPDR1	6.46	1.31596e-29
ENSMUSG00000002835	CHAF1A	3.146	1.55272e-42
ENSMUSG00000002870	MCM2	2.542	2.82061e-68
ENSMUSG00000003134	TBC1D8	1.051	2.33449e-07
ENSMUSG00000003355	FKBP11	-1.201	0.00282034
ENSMUSG00000003379	CD79A	-1.244	0.00595763
ENSMUSG00000003438	TIMM50	1.146	4.74141e-09
ENSMUSG00000003484	CYP4F18	-1.216	0.000338337
ENSMUSG00000003500	IMPDH1	1.1	5.92374e-08
ENSMUSG00000003528	SLC25A1	1.05	2.95192e-08
ENSMUSG00000003585	SEC14L2	6.392	6.90208e-102
ENSMUSG00000003779	KIF20A	3.487	3.1486e-72
ENSMUSG00000003824	SYCE2	4.098	1.97553e-77
ENSMUSG00000003849	NQO1	1.995	0.0219901
ENSMUSG00000003949	HLF	5.34	1.58901e-43
ENSMUSG00000004085	MAP3K20	1.235	1.54889e-05
ENSMUSG00000004099	DNMT1	1.347	6.79842e-09
ENSMUSG00000004105	ANGPTL2	1.548	1.62679e-07
ENSMUSG00000004270	LPCAT3	1.68	5.46201e-15
ENSMUSG00000004328	HIF3A	-1.151	0.0329629
ENSMUSG00000004462	TBCCD1	1.029	8.02761e-12
ENSMUSG00000004473	CLEC11A	2.279	5.62484e-14
ENSMUSG00000004558	NDRG2	1.662	0.00914814
ENSMUSG00000004562	ARHGEF40	3.423	3.13452e-23
ENSMUSG00000004565	PNPLA6	1.12	2.40189e-10
ENSMUSG00000004633	CHN2	1.093	0.00297522
ENSMUSG00000004698	HDAC9	-1.671	5.79801e-08
ENSMUSG00000004748	MTFP1	1.869	8.2456e-18
ENSMUSG00000004814	CCL24	3.163	0.00208884
ENSMUSG00000004897	HDGF	1.767	1.05012e-15
ENSMUSG00000004929	THOP1	1.391	8.40585e-14
ENSMUSG00000005338	CADM3	1.708	7.41192e-07
ENSMUSG00000005339	FCER1A	6.799	5.30744e-76
ENSMUSG00000005360	SLC1A3	7.437	9.14089e-21
ENSMUSG00000005397	NID1	1.185	0.00400522
ENSMUSG00000005410	MCM5	2.388	3.35356e-38
ENSMUSG00000005470	ASF1B	3.177	5.41037e-47
ENSMUSG00000005540	FCER2A	-1.496	0.00106258
ENSMUSG00000005583	MEF2C	-1.534	1.82506e-07
ENSMUSG00000005667	MTHFD2	1.68	0.00125816
ENSMUSG00000005672	KIT	4.155	3.08612e-34
ENSMUSG00000005732	RANBP1	1.461	9.92011e-17
ENSMUSG00000005973	RCN1	1.226	2.15186e-08
ENSMUSG00000005986	ANKRD13D	-1.075	0.00281439
ENSMUSG00000006235	EPOR	2.68	0.000138162
ENSMUSG00000006310	ZBTB32	2.241	1.5101e-14
ENSMUSG00000006315	TMEM147	1.084	3.20817e-08
ENSMUSG00000006342	SUSD2	3.154	1.38981e-17
ENSMUSG00000006356	CRIP2	2.213	7.87416e-12
ENSMUSG00000006360	CRIP1	1.088	1.84831e-06
ENSMUSG00000006362	CBFA2T3	1.021	9.18892e-10
ENSMUSG00000006386	TEK	4.845	1.9333e-11
ENSMUSG00000006390	ELOVL1	1.106	5.91425e-08
ENSMUSG00000006398	CDC20	3.453	3.48696e-77
ENSMUSG00000006442	SRM	2.464	2.54637e-43
ENSMUSG00000006457	ACTN3	1.774	0.0319263
ENSMUSG00000006567	ATP7B	4.479	1.2647e-10
ENSMUSG00000006575	RUNDC3A	1.694	0.00656717
ENSMUSG00000006675	P4HTM	1.761	8.34476e-15
ENSMUSG00000006678	POLA1	1.442	0.000562611
ENSMUSG00000006715	GMNN	2.327	4.26294e-45
ENSMUSG00000006720	ZFP184	-1.253	0.0210458
ENSMUSG00000006728	CDK4	1.182	1.54175e-09
ENSMUSG00000006930	HAP1	-1.354	0.0126782
ENSMUSG00000007039	DDAH2	2.503	1.52813e-25
ENSMUSG00000007050	LSM2	1.202	1.63997e-11
ENSMUSG00000007080	POLE	2.482	1.02225e-57
ENSMUSG00000007279	SCUBE2	4.238	1.17833e-08
ENSMUSG00000007783	CPT1C	2.435	2.41298e-07
ENSMUSG00000007908	HMGCLL1	-1.74	0.00859001
ENSMUSG00000008193	SPIB	-1.335	0.00119794
ENSMUSG00000008658	RBFOX1	3.876	6.27983e-07
ENSMUSG00000008843	CLDN13	5.336	2.42289e-16
ENSMUSG00000008999	BMP7	4.038	1.72752e-41
ENSMUSG00000009112	BCL2L13	1.206	7.9932e-24
ENSMUSG00000009350	MPO	1.778	0.0336884
ENSMUSG00000009575	CBX5	1.399	1.39525e-29
ENSMUSG00000009621	VAV2	-1.048	6.50733e-05
ENSMUSG00000009733	TFCP2	2.496	4.98269e-36
ENSMUSG00000009772	NUAK2	-1.185	0.000328631
ENSMUSG00000010021	KIF19A	-1.647	1.56666e-05
ENSMUSG00000010047	HYAL2	1.454	6.42024e-11
ENSMUSG00000010048	IFRD2	1.475	0.0140013
ENSMUSG00000010136	PIFO	-1.492	0.0143434
ENSMUSG00000010142	TNFRSF13B	-1.006	0.00192254
ENSMUSG00000010406	MRPL52	1.139	2.28317e-10
ENSMUSG00000010461	EYA4	7.147	3.75476e-48
ENSMUSG00000010663	FADS1	2.593	2.67389e-37
ENSMUSG00000010797	WNT2	10.83	1.28138e-51
ENSMUSG00000010911	APIP	1.722	4.47251e-20
ENSMUSG00000012443	KIF11	3.78	7.58087e-15
ENSMUSG00000012483	RPA3	1.246	6.94399e-09
ENSMUSG00000012519	MLKL	1.477	2.74099e-06
ENSMUSG00000013033	ADGRL1	1.983	1.08274e-23
ENSMUSG00000013155	ENKD1	1.953	4.15902e-17
ENSMUSG00000013418	B4GALNT2	-1.344	0.00388655
ENSMUSG00000013539	TANGO2	1.072	0.000282902
ENSMUSG00000014030	PAX5	-1.477	0.000699443
ENSMUSG00000014075	TCTEX1D2	-1.048	0.0462807
ENSMUSG00000014599	CSF1	-1.539	0.0356227
ENSMUSG00000014633	CMC2	1.547	7.03929e-19
ENSMUSG00000014773	DLL1	-1.244	0.00340987
ENSMUSG00000014786	SLC9A5	-1.497	0.0454017
ENSMUSG00000014907	NAF1	1.107	1.78809e-08
ENSMUSG00000014980	TSEN15	1.226	3.06483e-06
ENSMUSG00000015053	GATA2	2.715	2.14471e-07
ENSMUSG00000015217	HMGB3	3.814	3.90363e-69
ENSMUSG00000015222	MAP2	-1.931	0.000988558
ENSMUSG00000015243	ABCA1	-1.405	4.37809e-06
ENSMUSG00000015542	NAT9	1.069	5.87824e-07
ENSMUSG00000015597	ZFP318	-1.661	1.80416e-06
ENSMUSG00000015619	GATA3	1.621	1.96725e-13
ENSMUSG00000015879	FAM184B	3.69	2.13213e-08
ENSMUSG00000015880	NCAPG	3.626	1.75705e-13
ENSMUSG00000015950	NCF1	-1.207	0.000208319
ENSMUSG00000015968	CACNA1D	-1.128	0.00297254
ENSMUSG00000016087	FLI1	-1.132	0.0334395
ENSMUSG00000016128	STARD13	3.962	1.01513e-06
ENSMUSG00000016386	MPPED2	5.822	9.23792e-20
ENSMUSG00000016458	WT1	7.85	2.59394e-39
ENSMUSG00000016526	DYRK3	2.688	3.07993e-31
ENSMUSG00000016757	TTLL12	2.263	6.3821e-60
ENSMUSG00000017009	SDC4	-1.942	3.75306e-08
ENSMUSG00000017146	BRCA1	2.278	3.95945e-47
ENSMUSG00000017316	PPY	3.778	5.47982e-06
ENSMUSG00000017400	STAC2	-1.497	7.41251e-05
ENSMUSG00000017417	PLXDC1	1.973	6.65576e-13
ENSMUSG00000017499	CDC6	3.18	2.71402e-14
ENSMUSG00000017550	ATAD5	2.137	1.51429e-18
ENSMUSG00000017652	CD40	-1.099	0.00270197
ENSMUSG00000017697	ADA	1.47	4.79781e-08
ENSMUSG00000017716	BIRC5	3.276	2.81466e-10
ENSMUSG00000017765	SLC12A4	1.392	2.18613e-13
ENSMUSG00000017767	SPATA25	-1.598	0.0287433
ENSMUSG00000017861	MYBL2	3.16	8.52154e-28
ENSMUSG00000018001	CYTH3	1.715	1.38524e-11
ENSMUSG00000018166	ERBB3	1.082	0.0109388
ENSMUSG00000018168	IKZF3	-1.044	0.00486899
ENSMUSG00000018189	UCHL5	1.05	1.29675e-10
ENSMUSG00000018395	KIF3A	1.973	9.12022e-19
ENSMUSG00000018398	2019-09-08	4.566	1.12772e-28
ENSMUSG00000018428	AKAP1	2.91	2.80776e-46
ENSMUSG00000018446	C1QBP	1.454	4.07921e-13
ENSMUSG00000018509	CENPV	2.275	7.09645e-07
ENSMUSG00000018548	TRIM37	1.015	0.0212523
ENSMUSG00000018565	ELP5	1.198	1.99002e-18
ENSMUSG00000018844	FNDC8	4.689	3.27004e-13
ENSMUSG00000019027	DNAH1	-2.163	0.000930712
ENSMUSG00000019124	SCRN1	2.892	0.00140964
ENSMUSG00000019214	CHTF18	1.496	1.09878e-13
ENSMUSG00000019301	HSD17B1	-1.454	0.00174555
ENSMUSG00000019303	PSMC3IP	1.009	0.00870671
ENSMUSG00000019429	FFAR3	-2.632	0.00348289
ENSMUSG00000019437	TLCD1	1.338	3.79821e-06
ENSMUSG00000019467	ARHGEF25	7.658	7.52113e-80
ENSMUSG00000019478	RAB4A	3.89	1.45553e-49
ENSMUSG00000019590	CYB561	1.986	0.000127463
ENSMUSG00000019689	FMC1	1.224	4.72749e-09
ENSMUSG00000019773	FBXO5	1.611	1.55828e-13
ENSMUSG00000019796	LRP11	1.038	0.00385268
ENSMUSG00000019849	PREP	1.041	0.00529883
ENSMUSG00000019883	ECHDC1	1.157	4.48632e-08
ENSMUSG00000019942	CDK1	5.218	3.88521e-69
ENSMUSG00000019944	RHOBTB1	2.605	5.72854e-23
ENSMUSG00000019960	DUSP6	-1.11	0.00734392
ENSMUSG00000019971	CEP290	1.688	5.6515e-10
ENSMUSG00000019982	MYB	3.126	2.22502e-83
ENSMUSG00000019992	MTFR2	2.733	1.73457e-11
ENSMUSG00000020018	SNRPF	1.354	2.88387e-16
ENSMUSG00000020019	NTN4	4.907	1.98735e-21
ENSMUSG00000020022	NDUFA12	1.264	6.81795e-16
ENSMUSG00000020027	SOCS2	4.15	2.24295e-39
ENSMUSG00000020032	NUAK1	2.114	2.45401e-09
ENSMUSG00000020053	IGF1	2.894	0.00193512
ENSMUSG00000020072	PBLD2	-1.384	0.0374193
ENSMUSG00000020089	PPA1	1.581	1.85463e-16
ENSMUSG00000020092	PALD1	-1.18	0.0498135
ENSMUSG00000020105	LRIG3	-1.306	0.0116376
ENSMUSG00000020140	LGR5	-1.438	0.0326483
ENSMUSG00000020182	DDC	2.28	0.00018261
ENSMUSG00000020185	E2F7	5.191	6.95313e-48
ENSMUSG00000020186	CSRP2	-1.566	0.000649209
ENSMUSG00000020267	HINT1	1.205	5.37937e-09
ENSMUSG00000020279	IL9R	2.169	5.06211e-13
ENSMUSG00000020282	RHBDF1	1.304	0.00010696
ENSMUSG00000020328	NUDCD2	1.817	9.36055e-33
ENSMUSG00000020330	HMMR	3.321	3.65022e-07
ENSMUSG00000020377	LTC4S	3.047	1.49865e-11
ENSMUSG00000020383	IL13	6.055	2.43548e-30
ENSMUSG00000020396	NEFH	3.536	4.41293e-34
ENSMUSG00000020471	POLD2	1.333	1.91285e-08
ENSMUSG00000020481	ANKRD36	2.389	0.047444
ENSMUSG00000020492	SKA2	1.169	3.60007e-10
ENSMUSG00000020493	PRR11	2.817	1.10911e-09
ENSMUSG00000020534	SHMT1	1.434	1.27234e-10
ENSMUSG00000020538	SREBF1	1.027	1.64882e-06
ENSMUSG00000020541	TOM1L1	1.972	0.0197357
ENSMUSG00000020547	BZW2	1.688	1.094e-18
ENSMUSG00000020593	LPIN1	1.782	8.9944e-27
ENSMUSG00000020620	ABCA8B	-1.339	0.0283574
ENSMUSG00000020649	RRM2	2.943	1.60093e-08
ENSMUSG00000020682	MMP28	1.418	0.000312806
ENSMUSG00000020713	GH	-1.81	0.0143434
ENSMUSG00000020739	NUP85	1.308	4.53752e-13
ENSMUSG00000020766	GALK1	1.128	1.16581e-10
ENSMUSG00000020773	TRIM47	4.026	3.17422e-33
ENSMUSG00000020798	SPNS3	-1.492	1.10801e-05
ENSMUSG00000020806	RHBDF2	-1.066	2.00283e-05
ENSMUSG00000020808	PIMREG	4.036	3.96363e-13
ENSMUSG00000020834	DHRS13	1.906	2.589e-12
ENSMUSG00000020836	CORO6	-2.327	0.0463497
ENSMUSG00000020840	BLMH	1.052	1.3918e-14
ENSMUSG00000020841	CPD	1.788	8.51182e-06
ENSMUSG00000020895	TMEM107	3.041	2.73499e-39
ENSMUSG00000020897	AURKB	2.623	2.61576e-47
ENSMUSG00000020900	MYH10	3.668	1.94181e-09
ENSMUSG00000020914	TOP2A	3.03	6.43451e-09
ENSMUSG00000020932	GFAP	2.28	0.0312939
ENSMUSG00000020974	POLE2	1.76	1.0996e-29
ENSMUSG00000021013	TTC8	1.179	0.00358698
ENSMUSG00000021048	MTHFD1	2.632	9.14198e-105
ENSMUSG00000021056	TEX21	6.657	9.48326e-27
ENSMUSG00000021116	EIF2S1	1.081	2.63063e-15
ENSMUSG00000021118	PLEK2	6.011	7.09099e-20
ENSMUSG00000021175	CDCA7L	1.595	8.05263e-17
ENSMUSG00000021193	PITRM1	1.785	9.44083e-13
ENSMUSG00000021200	ASB2	1.076	0.00927313
ENSMUSG00000021203	OTUB2	3.237	1.20327e-49
ENSMUSG00000021208	IFI27L2B	3.842	0.0150861
ENSMUSG00000021215	NET1	1.006	0.000114873
ENSMUSG00000021221	DPF3	2.326	0.00267553
ENSMUSG00000021250	FOS	-1.647	0.0304827
ENSMUSG00000021253	TGFB3	-1.697	7.28248e-05
ENSMUSG00000021287	XRCC3	1.401	1.88424e-06
ENSMUSG00000021313	RYR2	-1.101	0.0113066
ENSMUSG00000021319	SFRP4	6.643	4.06897e-17
ENSMUSG00000021336	SLC17A4	2.12	0.00712084
ENSMUSG00000021361	TMEM14C	1.412	1.24695e-09
ENSMUSG00000021362	GCM2	2.008	2.89011e-07
ENSMUSG00000021384	SUSD3	-1.081	2.70891e-07
ENSMUSG00000021391	CENPP	2.676	1.1784e-14
ENSMUSG00000021411	PXDC1	-1.139	0.000107974
ENSMUSG00000021457	SYK	-1.112	0.000169368
ENSMUSG00000021485	MXD3	3.033	2.65739e-18
ENSMUSG00000021492	F12	-1.502	0.0120121
ENSMUSG00000021552	GKAP1	2.47	3.03912e-21
ENSMUSG00000021569	TRIP13	2.299	3.21181e-28
ENSMUSG00000021587	PCSK1	1.101	0.0235335
ENSMUSG00000021636	MARVELD2	-1.027	0.00528676
ENSMUSG00000021643	SERF1	1.724	1.14138e-06
ENSMUSG00000021703	SERINC5	-1.239	2.37636e-05
ENSMUSG00000021707	DHFR	2.152	1.99744e-34
ENSMUSG00000021719	RGS7BP	1.881	0.0103928
ENSMUSG00000021758	DDX4	1.707	0.000753391
ENSMUSG00000021830	TXNDC16	-1.077	0.00168599
ENSMUSG00000021831	ERO1L	1.199	7.41184e-06
ENSMUSG00000021835	BMP4	5.715	2.65831e-16
ENSMUSG00000021904	SEMA3G	-2.128	0.0013596
ENSMUSG00000021932	RNASEH2B	1.433	3.29191e-23
ENSMUSG00000021957	TKT	1.138	6.66407e-09
ENSMUSG00000021965	SKA3	3.247	3.66788e-22
ENSMUSG00000022033	PBK	5.969	1.2846e-36
ENSMUSG00000022057	ADAMDEC1	1.674	0.00408218
ENSMUSG00000022070	BORA	1.735	7.5063e-28
ENSMUSG00000022098	BMP1	1.771	0.0497572
ENSMUSG00000022100	XPO7	1.417	0.0382009
ENSMUSG00000022103	GFRA2	4.978	6.18015e-22
ENSMUSG00000022132	CLDN10	-1.337	0.00316306
ENSMUSG00000022150	DAB2	1.655	0.0175607
ENSMUSG00000022176	REM2	1.903	0.0215658
ENSMUSG00000022177	HAUS4	1.122	1.09915e-13
ENSMUSG00000022180	SLC7A8	4.162	4.57809e-50
ENSMUSG00000022195	6030458C11RIK	1.057	6.49183e-12
ENSMUSG00000022197	PDZD2	1.634	1.3243e-06
ENSMUSG00000022217	EMC9	1.084	3.16727e-07
ENSMUSG00000022226	MCPT2	7.833	9.41167e-25
ENSMUSG00000022227	MCPT1	9.056	2.78046e-17
ENSMUSG00000022234	CCT5	1.053	5.73381e-07
ENSMUSG00000022297	FZD6	1.673	0.00218502
ENSMUSG00000022305	LRP12	1.944	3.84969e-11
ENSMUSG00000022322	SHCBP1	3.7	6.50755e-12
ENSMUSG00000022325	POP1	1.272	1.20669e-08
ENSMUSG00000022346	MYC	1.745	6.67618e-22
ENSMUSG00000022351	SQLE	1.255	0.00024698
ENSMUSG00000022360	ATAD2	1.36	3.77402e-20
ENSMUSG00000022385	GTSE1	2.945	7.21996e-41
ENSMUSG00000022415	SYNGR1	2.595	0.00364757
ENSMUSG00000022416	CACNA1I	-1.309	0.00103727
ENSMUSG00000022422	DSCC1	2.478	2.84188e-29
ENSMUSG00000022456	2019-09-03	1.671	0.000842707
ENSMUSG00000022468	ENDOU	-1.343	0.0322105
ENSMUSG00000022474	PMM1	1.304	1.84955e-05
ENSMUSG00000022485	HOXC5	9.697	2.00205e-19
ENSMUSG00000022517	MGRN1	-1.014	7.87598e-07
ENSMUSG00000022537	TMEM44	5.456	3.80321e-33
ENSMUSG00000022540	ROGDI	-1.126	1.03025e-05
ENSMUSG00000022543	4930451G09RIK	-1.275	0.00601799
ENSMUSG00000022550	ADCK5	1.257	4.25514e-10
ENSMUSG00000022574	NAPRT	1.516	2.20937e-12
ENSMUSG00000022586	LY6I	-1.489	0.0130563
ENSMUSG00000022594	LYNX1	-1.575	0.000267899
ENSMUSG00000022623	SHANK3	4.372	1.505e-14
ENSMUSG00000022661	CD200	-1.323	7.18786e-05
ENSMUSG00000022671	MZT2	1.014	2.83606e-05
ENSMUSG00000022673	MCM4	1.408	7.15648e-21
ENSMUSG00000022686	B3GNT5	-1.421	0.00011821
ENSMUSG00000022722	ARL6	1.814	2.23875e-07
ENSMUSG00000022742	CPOX	2.492	5.20867e-11
ENSMUSG00000022748	CMSS1	1.339	4.23617e-07
ENSMUSG00000022750	KLHL22	2.262	4.93634e-40
ENSMUSG00000022755	ADGRG7	2.273	4.79389e-05
ENSMUSG00000022756	SLC7A4	3.79	1.45572e-15
ENSMUSG00000022790	IGSF11	7.322	8.62489e-16
ENSMUSG00000022814	UMPS	1.024	5.8485e-05
ENSMUSG00000022820	NDUFB4	1.34	3.15215e-09
ENSMUSG00000022833	CCDC14	1.732	3.67985e-19
ENSMUSG00000022842	ECE2	1.16	3.65659e-08
ENSMUSG00000022881	RFC4	2.446	4.05935e-43
ENSMUSG00000022883	ROBO1	2.855	2.1072e-05
ENSMUSG00000022913	PSMG1	1.034	5.00842e-06
ENSMUSG00000022945	CHAF1B	3.178	1.21778e-73
ENSMUSG00000022956	ATP5O	1.044	2.43405e-14
ENSMUSG00000022994	ADCY6	1.661	0.0258817
ENSMUSG00000023004	TUBA1B	2.258	9.60604e-53
ENSMUSG00000023015	RACGAP1	1.579	2.95921e-27
ENSMUSG00000023030	SLC11A2	1.29	3.69705e-08
ENSMUSG00000023033	SCN8A	-3.236	2.61522e-05
ENSMUSG00000023089	NDUFA5	1.356	6.53376e-12
ENSMUSG00000023341	MX2	-1.206	0.00656117
ENSMUSG00000023345	POC1A	1.397	1.45082e-14
ENSMUSG00000023439	GNB3	3.864	2.80671e-06
ENSMUSG00000023467	TULP2	2.182	0.000491585
ENSMUSG00000023505	CDCA3	3.001	2.15061e-11
ENSMUSG00000023571	C1QTNF12	4.224	4.27693e-78
ENSMUSG00000023809	RPS6KA2	2.671	1.29632e-20
ENSMUSG00000023828	SLC22A3	3.718	9.53607e-10
ENSMUSG00000023883	PHF10	1.439	3.44786e-22
ENSMUSG00000023909	PAQR4	3.831	5.52875e-52
ENSMUSG00000023940	SGO1	3.498	4.64746e-20
ENSMUSG00000023942	SLC29A1	2.957	6.75535e-57
ENSMUSG00000023960	ENPP5	2.152	0.000533704
ENSMUSG00000023961	ENPP4	2.685	6.22025e-41
ENSMUSG00000023968	CRIP3	-1.802	0.00063436
ENSMUSG00000024008	CPNE5	-1.862	1.15272e-05
ENSMUSG00000024013	FGD2	-1.118	0.000413656
ENSMUSG00000024026	GLO1	1.637	0.000119828
ENSMUSG00000024042	SIK1	-1.214	0.00665098
ENSMUSG00000024063	LBH	-1.079	0.000877254
ENSMUSG00000024064	GALNT14	-2.087	0.00741413
ENSMUSG00000024112	CACNA1H	-1.999	4.3889e-06
ENSMUSG00000024165	JPT2	1.093	7.13571e-11
ENSMUSG00000024177	NME4	1.593	1.93687e-06
ENSMUSG00000024190	DUSP1	-1.376	0.0175077
ENSMUSG00000024301	KIFC5B	1.394	9.10291e-10
ENSMUSG00000024340	BTNL2	-1.826	5.32707e-07
ENSMUSG00000024420	ZFP521	3.538	1.41967e-11
ENSMUSG00000024537	PSMG2	1.122	7.51492e-10
ENSMUSG00000024548	SETBP1	-1.059	0.0012724
ENSMUSG00000024583	TXNL1	1.111	2.33817e-06
ENSMUSG00000024640	PSAT1	2.673	6.89552e-54
ENSMUSG00000024673	MS4A1	-1.058	0.0158625
ENSMUSG00000024680	MS4A2	6.34	1.2556e-78
ENSMUSG00000024697	GNA14	6.129	1.75298e-39
ENSMUSG00000024726	CARNMT1	1.37	2.4448e-11
ENSMUSG00000024738	PGA5	6.443	1.9408e-18
ENSMUSG00000024742	FEN1	1.81	1.60245e-26
ENSMUSG00000024790	SAC3D1	1.062	9.75402e-07
ENSMUSG00000024791	CDCA5	4.062	6.89552e-54
ENSMUSG00000024844	BANF1	1.087	1.01459e-12
ENSMUSG00000024896	MINPP1	2.265	3.94362e-50
ENSMUSG00000024899	PAPSS2	1.781	0.000360239
ENSMUSG00000024968	RCOR2	-1.388	0.000122615
ENSMUSG00000024981	ACSL5	1.102	6.18409e-16
ENSMUSG00000024989	CEP55	1.56	1.20224e-06
ENSMUSG00000024997	PRDX3	1.367	0.00367926
ENSMUSG00000025001	HELLS	1.632	7.51615e-16
ENSMUSG00000025007	ALDH18A1	1.373	2.1418e-23
ENSMUSG00000025017	PIK3AP1	-1.088	0.000880056
ENSMUSG00000025076	CASP7	1.015	0.00298739
ENSMUSG00000025077	DCLRE1A	1.584	2.4315e-14
ENSMUSG00000025134	ALYREF	1.294	2.98472e-16
ENSMUSG00000025140	PYCR1	1.775	0.00764154
ENSMUSG00000025154	ARHGAP19	2.002	8.0071e-21
ENSMUSG00000025189	CNNM1	8.199	3.30987e-60
ENSMUSG00000025194	ABCC2	-2.642	0.000277787
ENSMUSG00000025203	SCD2	1.554	1.40699e-14
ENSMUSG00000025213	KAZALD1	5.246	4.78023e-67
ENSMUSG00000025278	FLNB	1.418	1.52371e-10
ENSMUSG00000025328	PADI3	5.605	3.32896e-62
ENSMUSG00000025353	ORMDL2	1.009	4.08546e-10
ENSMUSG00000025364	PA2G4	1.336	4.20381e-17
ENSMUSG00000025381	CNPY2	1.269	2.14369e-13
ENSMUSG00000025393	ATP5B	1.104	0.0315674
ENSMUSG00000025395	PRIM1	2.03	2.20276e-25
ENSMUSG00000025400	TAC2	4.759	4.13734e-05
ENSMUSG00000025403	SHMT2	1.792	2.14964e-24
ENSMUSG00000025429	PSTPIP2	1.229	6.63413e-05
ENSMUSG00000025495	PTDSS2	1.154	0.0036258
ENSMUSG00000025507	PIDD1	1.145	3.17072e-08
ENSMUSG00000025511	TSPAN4	2.712	6.21824e-28
ENSMUSG00000025573	6030468B19RIK	2.378	4.25985e-14
ENSMUSG00000025574	TK1	2.308	2.47995e-33
ENSMUSG00000025608	PODXL	7.193	2.07975e-52
ENSMUSG00000025630	HPRT	1.076	7.06817e-10
ENSMUSG00000025648	PFKFB4	-1.108	0.0319438
ENSMUSG00000025701	ALOX5	2.055	4.2848e-07
ENSMUSG00000025728	PIGQ	1.193	0.00903835
ENSMUSG00000025732	MCRIP2	1.879	8.99485e-13
ENSMUSG00000025747	TYMS	3.175	3.34082e-28
ENSMUSG00000025758	PLK4	1.69	5.21003e-05
ENSMUSG00000025813	HOMER2	3.771	2.45281e-10
ENSMUSG00000025912	MYBL1	1.164	2.21774e-05
ENSMUSG00000025932	EYA1	-1.505	3.12394e-05
ENSMUSG00000025938	SLCO5A1	-2.158	2.31334e-06
ENSMUSG00000025977	BOLL	1.095	0.00286983
ENSMUSG00000025980	HSPD1	1.161	7.18558e-06
ENSMUSG00000025997	IKZF2	3.081	5.14489e-37
ENSMUSG00000026011	CTLA4	1.16	0.00122278
ENSMUSG00000026020	NOP58	1.251	8.09801e-14
ENSMUSG00000026024	ALS2	1.078	1.50117e-12
ENSMUSG00000026037	ORC2	1.076	3.34665e-11
ENSMUSG00000026039	SGO2A	2.691	1.27297e-19
ENSMUSG00000026047	KDELC1	1.634	6.25515e-23
ENSMUSG00000026069	IL1RL1	6.177	2.4597e-102
ENSMUSG00000026072	IL1R1	2.449	9.96213e-06
ENSMUSG00000026121	SEMA4C	1.75	3.42922e-07
ENSMUSG00000026134	PRIM2	1.253	3.60647e-06
ENSMUSG00000026167	WNT10A	-2.138	0.00265266
ENSMUSG00000026196	BARD1	1.532	0.0282741
ENSMUSG00000026274	PASK	3.309	4.59005e-61
ENSMUSG00000026281	DTYMK	1.339	1.45778e-14
ENSMUSG00000026308	KLHL30	-2.277	0.0151777
ENSMUSG00000026344	LYPD1	2.252	0.0355665
ENSMUSG00000026347	TMEM163	-1.093	0.000414297
ENSMUSG00000026355	MCM6	2.197	1.24425e-47
ENSMUSG00000026389	STEAP3	3.758	2.34158e-54
ENSMUSG00000026407	CACNA1S	1.113	0.00191104
ENSMUSG00000026411	TMEM9	3.491	2.08662e-79
ENSMUSG00000026427	EIF2D	1.438	1.8216e-24
ENSMUSG00000026429	UBE2T	1.576	5.5686e-14
ENSMUSG00000026435	SLC45A3	4.641	7.58986e-12
ENSMUSG00000026447	PIK3C2B	-1.031	1.02488e-05
ENSMUSG00000026482	RGL1	1.287	2.25312e-10
ENSMUSG00000026494	KIF26B	8.406	5.03646e-63
ENSMUSG00000026520	PYCR2	1.011	3.38587e-08
ENSMUSG00000026556	VANGL2	-1.501	6.26388e-05
ENSMUSG00000026558	UCK2	1.769	1.34627e-23
ENSMUSG00000026589	SEC16B	-1.215	0.00622245
ENSMUSG00000026594	RALGPS2	-1.449	3.1154e-08
ENSMUSG00000026603	SMYD2	1.526	6.5058e-07
ENSMUSG00000026604	PTPN14	1.01	0.013242
ENSMUSG00000026605	CENPF	2.509	0.000209315
ENSMUSG00000026614	SLC30A10	8.153	1.44469e-45
ENSMUSG00000026622	NEK2	3.254	3.76739e-33
ENSMUSG00000026623	LPGAT1	-1.096	0.00116119
ENSMUSG00000026639	LAMB3	-1.26	0.00118108
ENSMUSG00000026646	SUV39H2	2.093	1.11018e-19
ENSMUSG00000026649	CFAP126	1.056	0.0138126
ENSMUSG00000026657	FRMD4A	2.021	3.37178e-18
ENSMUSG00000026669	MCM10	3.555	7.40131e-15
ENSMUSG00000026670	UAP1	1.213	4.08627e-17
ENSMUSG00000026683	NUF2	4.304	3.74146e-25
ENSMUSG00000026688	MGST3	2.076	0.00565168
ENSMUSG00000026748	PLXDC2	2.152	6.33432e-05
ENSMUSG00000026779	MASTL	1.937	0.000290894
ENSMUSG00000026797	STXBP1	1.113	0.047311
ENSMUSG00000026814	ENG	1.912	8.94127e-09
ENSMUSG00000026815	GFI1B	2.623	0.000214444
ENSMUSG00000026826	NR4A2	1.155	0.0245961
ENSMUSG00000026833	OLFM1	1.955	1.25387e-05
ENSMUSG00000026837	COL5A1	7.249	2.10107e-57
ENSMUSG00000026921	EGFL7	6.798	4.92689e-62
ENSMUSG00000026955	SAPCD2	3.957	1.38411e-14
ENSMUSG00000026974	ZMYND19	1.252	6.90328e-12
ENSMUSG00000027018	HAT1	1.505	5.76363e-17
ENSMUSG00000027074	SLC43A3	1.948	0.00927313
ENSMUSG00000027075	SLC43A1	2.963	1.64525e-07
ENSMUSG00000027076	TIMM10	1.482	1.17724e-19
ENSMUSG00000027099	MTX2	1.063	9.18245e-08
ENSMUSG00000027115	KIF18A	1.06	0.00603561
ENSMUSG00000027160	CCDC34	1.168	5.27115e-08
ENSMUSG00000027168	PAX6	3.041	0.000887944
ENSMUSG00000027202	SLC12A1	7.75	2.07975e-52
ENSMUSG00000027210	MEIS2	3.677	0.000104795
ENSMUSG00000027249	F2	2.211	8.84582e-05
ENSMUSG00000027297	LTK	-1.084	0.0112438
ENSMUSG00000027323	RAD51	3.35	4.78023e-67
ENSMUSG00000027329	SPEF1	1.5	9.93101e-13
ENSMUSG00000027331	KNSTRN	1.434	4.65213e-18
ENSMUSG00000027342	PCNA	1.412	8.37641e-15
ENSMUSG00000027353	MCM8	1.375	2.04094e-12
ENSMUSG00000027359	SLC27A2	-2.931	0.0338574
ENSMUSG00000027368	DUSP2	-1.463	0.000194947
ENSMUSG00000027378	NPHP1	2.712	7.49499e-09
ENSMUSG00000027379	BUB1	3.971	1.63381e-13
ENSMUSG00000027454	GINS1	2.394	7.96222e-29
ENSMUSG00000027463	SLC52A3	1.974	1.08059e-13
ENSMUSG00000027469	TPX2	1.919	0.0197926
ENSMUSG00000027489	NECAB3	2.287	3.70366e-09
ENSMUSG00000027490	E2F1	2.15	4.9536e-19
ENSMUSG00000027496	AURKA	2.353	1.44849e-29
ENSMUSG00000027506	TPD52	-1.005	0.0191973
ENSMUSG00000027525	PHACTR3	-3.51	0.000122615
ENSMUSG00000027540	PTPN1	-1.057	0.0399985
ENSMUSG00000027555	CAR13	5.072	6.59673e-47
ENSMUSG00000027556	CAR1	6.601	1.24925e-27
ENSMUSG00000027559	CAR3	4.308	8.22298e-05
ENSMUSG00000027583	ZBTB46	1.712	4.03317e-08
ENSMUSG00000027635	DSN1	1.012	6.03497e-09
ENSMUSG00000027654	FAM83D	1.356	0.0151688
ENSMUSG00000027669	GNB4	4.331	3.92625e-104
ENSMUSG00000027676	CCDC39	5.781	1.11048e-13
ENSMUSG00000027699	ECT2	2.007	2.54892e-07
ENSMUSG00000027715	CCNA2	2.391	0.00659317
ENSMUSG00000027752	EXOSC8	1.217	5.9061e-09
ENSMUSG00000027776	IL12A	-2.038	3.97666e-09
ENSMUSG00000027811	4930579G24RIK	1.522	1.14383e-13
ENSMUSG00000027883	GPSM2	2.13	3.76611e-10
ENSMUSG00000027895	KCNC4	8.496	5.26561e-53
ENSMUSG00000027955	FAM198B	1.876	0.000159339
ENSMUSG00000027963	EXTL2	1.327	1.51227e-10
ENSMUSG00000027977	NDST3	4.148	0.000126222
ENSMUSG00000028044	CKS1B	3.663	1.66694e-70
ENSMUSG00000028068	IQGAP3	3.457	1.46239e-07
ENSMUSG00000028111	CTSK	-1.143	0.0264457
ENSMUSG00000028185	DNASE2B	3.879	1.3594e-21
ENSMUSG00000028223	DECR1	2.487	1.20327e-49
ENSMUSG00000028224	NBN	1.666	9.97109e-29
ENSMUSG00000028256	ODF2L	1.037	2.28874e-09
ENSMUSG00000028289	EPHA7	6.06	5.36415e-53
ENSMUSG00000028312	SMC2	1.713	7.6169e-22
ENSMUSG00000028334	NANS	1.243	2.99911e-14
ENSMUSG00000028339	COL15A1	1.654	0.000172619
ENSMUSG00000028378	PTGR1	1.229	0.0155477
ENSMUSG00000028385	SNX30	-1.391	2.93744e-06
ENSMUSG00000028393	ALAD	2.207	2.24595e-29
ENSMUSG00000028399	PTPRD	4.339	0.0344161
ENSMUSG00000028438	KIF24	1.257	0.0084143
ENSMUSG00000028455	STOML2	1.143	3.68869e-14
ENSMUSG00000028457	ATP8B5	2.704	0.000708406
ENSMUSG00000028459	CD72	-1.626	2.55758e-06
ENSMUSG00000028469	NPR2	1.78	0.000173948
ENSMUSG00000028484	PSIP1	1.009	1.38002e-12
ENSMUSG00000028517	PLPP3	-1.523	0.0024891
ENSMUSG00000028521	SLC35D1	1.887	7.68842e-38
ENSMUSG00000028524	SGIP1	5.037	3.66177e-21
ENSMUSG00000028528	DNAJC6	3.589	1.55217e-48
ENSMUSG00000028542	SLC6A9	2.052	0.0314853
ENSMUSG00000028545	BEND5	-1.352	1.15272e-05
ENSMUSG00000028551	CDKN2C	2.158	1.44904e-06
ENSMUSG00000028565	NFIA	2.472	4.75124e-35
ENSMUSG00000028587	ORC1	2.165	0.00808244
ENSMUSG00000028613	LRP8	1.023	0.0232648
ENSMUSG00000028614	NDC1	1.215	1.07655e-15
ENSMUSG00000028617	LRRC42	1.154	5.02254e-10
ENSMUSG00000028633	CTPS	1.433	1.28427e-23
ENSMUSG00000028634	HIVEP3	-1.527	6.71212e-05
ENSMUSG00000028643	SVBP	1.271	0.00012552
ENSMUSG00000028644	ERMAP	4.602	1.05555e-12
ENSMUSG00000028678	KIF2C	4.291	9.95574e-25
ENSMUSG00000028702	RAD54L	3.438	4.1477e-51
ENSMUSG00000028718	STIL	3.274	4.46951e-09
ENSMUSG00000028757	DDOST	1.047	2.76965e-10
ENSMUSG00000028807	ZBTB8A	1.355	9.81483e-12
ENSMUSG00000028825	RHD	2.817	0.00154798
ENSMUSG00000028832	STMN1	2.82	9.19325e-32
ENSMUSG00000028836	SLC30A2	7.319	1.26929e-54
ENSMUSG00000028838	EXTL1	-1.037	0.00663783
ENSMUSG00000028873	CDCA8	3.272	2.61233e-23
ENSMUSG00000028896	RCC1	1.455	1.79625e-24
ENSMUSG00000028927	PADI2	-1.284	0.000187201
ENSMUSG00000028943	ESPN	2.486	5.51788e-27
ENSMUSG00000028982	SLC25A33	-1.013	0.0132962
ENSMUSG00000029090	ADGRA3	1.919	0.000545604
ENSMUSG00000029167	PPARGC1A	-1.537	3.3679e-05
ENSMUSG00000029177	CENPA	1.13	1.53987e-10
ENSMUSG00000029185	FAM114A1	-1.117	0.0224478
ENSMUSG00000029192	TBC1D14	-1.04	0.0167338
ENSMUSG00000029217	TEC	-1.096	0.00168283
ENSMUSG00000029246	PPAT	1.024	3.65395e-09
ENSMUSG00000029247	PAICS	1.184	9.60048e-10
ENSMUSG00000029310	NUDT9	1.898	4.84138e-51
ENSMUSG00000029314	GPAT3	-1.65	0.000215532
ENSMUSG00000029333	NA	-1.047	0.000406076
ENSMUSG00000029363	RFC5	1.312	1.72682e-13
ENSMUSG00000029386	TCTN2	-1.043	0.0490938
ENSMUSG00000029414	KNTC1	3.112	2.40497e-08
ENSMUSG00000029430	RAN	1.395	2.28254e-23
ENSMUSG00000029463	FAM216A	1.31	1.64381e-12
ENSMUSG00000029499	PXMP2	3.135	3.48801e-33
ENSMUSG00000029510	GPC2	-1.073	0.0359043
ENSMUSG00000029516	CIT	1.791	0.00495542
ENSMUSG00000029521	CHEK2	1.158	0.00605878
ENSMUSG00000029564	4930519G04RIK	-3.469	0.00306502
ENSMUSG00000029591	UNG	1.492	3.52153e-17
ENSMUSG00000029596	SDSL	3.902	8.95325e-09
ENSMUSG00000029610	AIMP2	1.44	4.5959e-12
ENSMUSG00000029641	RASL11A	3.943	1.51441e-20
ENSMUSG00000029673	AUTS2	2.525	3.67306e-11
ENSMUSG00000029716	TFR2	5.287	4.4511e-66
ENSMUSG00000029730	MCM7	1.634	1.85438e-27
ENSMUSG00000029752	ASNS	4.059	3.09543e-09
ENSMUSG00000029777	GARS	1.126	9.31279e-13
ENSMUSG00000029802	ABCG2	2.707	9.51765e-09
ENSMUSG00000029814	IGF2BP3	-1.977	0.0487686
ENSMUSG00000029866	KEL	2.135	0.0358921
ENSMUSG00000029910	MAD2L1	1.998	1.83123e-31
ENSMUSG00000030007	CCT7	1.01	0.00225885
ENSMUSG00000030029	LRIG1	1.182	0.000375436
ENSMUSG00000030048	GKN3	8.795	1.08466e-43
ENSMUSG00000030051	APLF	1.344	0.000528164
ENSMUSG00000030074	GXYLT2	6.279	1.37082e-14
ENSMUSG00000030075	CNTN3	6.733	3.46612e-26
ENSMUSG00000030089	SLC41A3	2.213	1.6223e-30
ENSMUSG00000030103	BHLHE40	1.579	1.4086e-05
ENSMUSG00000030108	SLC6A13	1.189	0.0270299
ENSMUSG00000030117	GDF3	3.177	1.47044e-15
ENSMUSG00000030154	KLRB1F	-1.135	0.00578558
ENSMUSG00000030217	ART4	1.498	0.000250268
ENSMUSG00000030219	ERP27	-1.241	0.0371775
ENSMUSG00000030245	GOLT1B	1.155	2.54795e-15
ENSMUSG00000030303	FAR2	4.504	1.84082e-21
ENSMUSG00000030313	DENND5B	-1.242	0.00098768
ENSMUSG00000030346	RAD51AP1	4.213	1.83441e-69
ENSMUSG00000030357	FKBP4	1.047	1.29182e-05
ENSMUSG00000030361	KLRB1A	-1.739	0.0332352
ENSMUSG00000030410	DMWD	1.12	0.0218048
ENSMUSG00000030431	TMEM238	1.366	2.07688e-10
ENSMUSG00000030465	PSD3	-1.516	0.025457
ENSMUSG00000030468	SIGLECG	-1.419	0.00111206
ENSMUSG00000030515	TARSL2	1.69	1.53587e-21
ENSMUSG00000030528	BLM	2.526	6.34721e-60
ENSMUSG00000030545	PEX11A	1.987	0.000448228
ENSMUSG00000030559	RAB38	5.394	2.63794e-38
ENSMUSG00000030577	CD22	-1.654	0.000134687
ENSMUSG00000030584	DPF1	6.28	4.47978e-41
ENSMUSG00000030588	YIF1B	1.167	1.75705e-13
ENSMUSG00000030641	DDIAS	2.26	2.0181e-21
ENSMUSG00000030643	RAB30	-1.081	0.000392211
ENSMUSG00000030664	SOX6OS	6.167	4.19746e-26
ENSMUSG00000030674	QPRT	1.055	0.000373446
ENSMUSG00000030677	KIF22	3.884	2.81924e-71
ENSMUSG00000030691	FCHSD2	-1.207	0.000193295
ENSMUSG00000030724	CD19	-1.149	0.00347584
ENSMUSG00000030761	MYO7A	-1.138	0.000120038
ENSMUSG00000030768	DISP1	1.129	7.07667e-09
ENSMUSG00000030790	ADM	1.8	2.39152e-05
ENSMUSG00000030798	CD37	-1.077	0.00301994
ENSMUSG00000030867	PLK1	3.595	2.71247e-72
ENSMUSG00000030924	REXO5	1.016	3.69115e-07
ENSMUSG00000030978	RRM1	2.111	1.33e-59
ENSMUSG00000031004	MKI67	3.192	1.03691e-07
ENSMUSG00000031016	WEE1	2.64	4.25539e-33
ENSMUSG00000031097	TNNI2	-1.275	0.0119433
ENSMUSG00000031257	NOX1	-1.343	0.0468727
ENSMUSG00000031258	XKRX	-1.081	0.00757985
ENSMUSG00000031262	CENPI	2.487	2.43972e-10
ENSMUSG00000031274	COL4A5	-1.495	0.0358533
ENSMUSG00000031292	CDKL5	-1.182	4.57039e-05
ENSMUSG00000031337	MTM1	-1.02	0.000357484
ENSMUSG00000031367	AP1S2	-1.439	0.0446702
ENSMUSG00000031431	TSC22D3	-1.02	0.000493782
ENSMUSG00000031432	PRPS1	1.048	1.0317e-10
ENSMUSG00000031438	RNF128	3.231	1.02901e-15
ENSMUSG00000031506	PTPN7	1.699	9.49982e-23
ENSMUSG00000031557	PLEKHA2	-1.153	0.00114503
ENSMUSG00000031565	FGFR1	3.171	6.98906e-25
ENSMUSG00000031568	RWDD4A	1.127	8.82032e-14
ENSMUSG00000031570	PLPP5	1.07	4.50365e-07
ENSMUSG00000031575	ASH2L	1.078	7.00175e-13
ENSMUSG00000031616	EDNRA	7.945	8.5867e-36
ENSMUSG00000031628	CASP3	2.02	5.08596e-05
ENSMUSG00000031629	CENPU	1.77	4.96571e-10
ENSMUSG00000031661	NKD1	3.701	1.73456e-09
ENSMUSG00000031697	ORC6	2.084	1.55853e-34
ENSMUSG00000031727	PMFBP1	9.678	4.99441e-36
ENSMUSG00000031732	PHLPP2	1.191	1.33822e-16
ENSMUSG00000031736	CRNDE	3.867	7.71605e-11
ENSMUSG00000031756	CENPN	3.279	6.46838e-63
ENSMUSG00000031758	CDYL2	-1.063	0.0129971
ENSMUSG00000031766	SLC12A3	-1.293	0.0305405
ENSMUSG00000031780	CCL17	3.967	1.10891e-10
ENSMUSG00000031786	DRC7	3.011	1.8509e-08
ENSMUSG00000031821	GINS2	2.608	1.80628e-40
ENSMUSG00000031842	PDE4C	-1.15	0.0187429
ENSMUSG00000031870	PGR	5.734	5.1073e-12
ENSMUSG00000031877	CES2G	5.116	2.46538e-20
ENSMUSG00000031883	CAR7	4.536	1.81709e-86
ENSMUSG00000031906	SMPD3	-1.674	8.33351e-05
ENSMUSG00000031948	KARS	1.7	4.11443e-23
ENSMUSG00000031951	TMEM231	1.986	3.49417e-14
ENSMUSG00000031954	CFDP1	1.075	5.674e-14
ENSMUSG00000031960	AARS	1.011	1.71355e-15
ENSMUSG00000031974	ABCB10	3.229	9.74001e-33
ENSMUSG00000031996	APLP2	1.627	2.07802e-13
ENSMUSG00000032014	OAF	2.882	2.64312e-21
ENSMUSG00000032024	CLMP	-2.566	0.00792786
ENSMUSG00000032026	REXO2	1.126	0.00388731
ENSMUSG00000032050	RDX	1.067	7.26893e-17
ENSMUSG00000032051	FDX1	2.486	1.58256e-36
ENSMUSG00000032076	CADM1	5.813	3.36173e-34
ENSMUSG00000032089	IL10RA	-1.188	5.80057e-05
ENSMUSG00000032101	DDX25	-1.591	0.00518293
ENSMUSG00000032113	CHEK1	2.45	3.03592e-14
ENSMUSG00000032126	HMBS	2.434	1.81008e-05
ENSMUSG00000032131	ABCG4	4.088	1.4108e-15
ENSMUSG00000032174	ICAM5	2.894	2.95316e-18
ENSMUSG00000032186	TMOD2	2.463	1.27878e-06
ENSMUSG00000032204	AQP9	1.586	0.000595616
ENSMUSG00000032218	CCNB2	2.691	3.24725e-06
ENSMUSG00000032221	MNS1	3.465	6.04123e-46
ENSMUSG00000032245	CLN6	1.144	3.40657e-11
ENSMUSG00000032279	IDH3A	1.358	1.0176e-15
ENSMUSG00000032300	1700017B05RIK	1.478	1.51548e-18
ENSMUSG00000032344	CGAS	1.639	1.19839e-12
ENSMUSG00000032360	HCRTR2	-1.018	0.0400283
ENSMUSG00000032369	PLSCR1	1.356	0.00499989
ENSMUSG00000032374	PLOD2	2.255	1.14819e-09
ENSMUSG00000032377	PLSCR4	2.474	8.93249e-08
ENSMUSG00000032397	TIPIN	1.865	1.86777e-19
ENSMUSG00000032526	SS18L2	1.091	2.93303e-08
ENSMUSG00000032547	RYK	2.575	3.02899e-10
ENSMUSG00000032556	BFSP2	-1.481	1.38103e-05
ENSMUSG00000032558	NPHP3	-1.373	2.1608e-06
ENSMUSG00000032578	CISH	2.881	1.23741e-22
ENSMUSG00000032609	KLHDC8B	3.002	9.45421e-25
ENSMUSG00000032673	PRORSD1	1.007	5.73463e-09
ENSMUSG00000032715	TRIB3	1.381	9.16875e-08
ENSMUSG00000032718	MANSC1	1.063	0.0156405
ENSMUSG00000032773	CHRM1	3.223	0.000547469
ENSMUSG00000032783	TROAP	4.083	2.52478e-29
ENSMUSG00000032818	LOXHD1	-3.134	1.40789e-06
ENSMUSG00000032826	ANK2	5.106	1.16795e-06
ENSMUSG00000032841	PRR5L	-1.162	0.0450629
ENSMUSG00000032854	UGT8A	4.106	0.000137496
ENSMUSG00000032899	STYK1	-1.464	0.0382125
ENSMUSG00000032902	SLC16A1	1.503	0.00163978
ENSMUSG00000032959	PEBP1	1.21	7.67203e-13
ENSMUSG00000033007	ASIC4	6.844	8.84044e-38
ENSMUSG00000033020	POLR2F	1.076	5.14505e-08
ENSMUSG00000033031	CIP2A	2.375	7.51615e-16
ENSMUSG00000033033	CALHM2	-1.01	0.00550909
ENSMUSG00000033065	PFKM	2.689	5.71133e-21
ENSMUSG00000033187	BC016579	1.806	0.0187652
ENSMUSG00000033207	MAMDC2	3.093	6.19374e-09
ENSMUSG00000033256	SHF	2.082	5.36228e-34
ENSMUSG00000033386	FRRS1	1.42	2.50933e-15
ENSMUSG00000033697	ARHGAP39	1.385	3.8723e-09
ENSMUSG00000033717	ADRA2A	2.892	6.79842e-09
ENSMUSG00000033722	BC034090	1.654	0.0212094
ENSMUSG00000033730	EGR3	-1.121	0.00358555
ENSMUSG00000033762	RECQL4	2.416	2.45341e-18
ENSMUSG00000033847	PLA2G4C	2.484	1.40654e-07
ENSMUSG00000033885	PXK	-1.039	5.03651e-08
ENSMUSG00000033949	TRIM36	-1.131	0.000159368
ENSMUSG00000033952	ASPM	2.699	1.65884e-10
ENSMUSG00000033960	JCAD	2.636	3.06212e-06
ENSMUSG00000033970	RFC3	1.056	6.34317e-06
ENSMUSG00000034059	YPEL4	2.126	0.0208876
ENSMUSG00000034101	CTNND1	1.264	0.000663612
ENSMUSG00000034107	ANO7	-2.764	0.0313267
ENSMUSG00000034108	CCS	1.105	0.000122574
ENSMUSG00000034109	GOLIM4	1.882	7.73718e-39
ENSMUSG00000034117	PTGDR2	1.354	0.0217706
ENSMUSG00000034118	TPST1	-1.157	2.32525e-05
ENSMUSG00000034175	RHBDD3	1.787	3.62087e-27
ENSMUSG00000034206	POLQ	1.702	1.81863e-16
ENSMUSG00000034311	KIF4	2.469	0.00031243
ENSMUSG00000034329	BRIP1	2.116	3.30655e-07
ENSMUSG00000034330	PLCG2	-1.106	0.000212455
ENSMUSG00000034416	PKD1L2	1.072	0.0224478
ENSMUSG00000034424	GCSH	1.361	1.40164e-12
ENSMUSG00000034462	PKD2	1.894	9.50011e-09
ENSMUSG00000034634	LY6D	-1.027	0.0127016
ENSMUSG00000034675	DBN1	-1.857	0.013091
ENSMUSG00000034686	PRR7	-1.004	0.0323251
ENSMUSG00000034687	FRAS1	3.871	5.7844e-13
ENSMUSG00000034764	1700006J14RIK	2.877	2.76386e-05
ENSMUSG00000034773	BC030867	5.747	3.58565e-39
ENSMUSG00000034796	CPNE7	3.847	3.80654e-43
ENSMUSG00000034825	NRIP3	5.724	1.14816e-36
ENSMUSG00000034842	ART3	1.318	0.0049306
ENSMUSG00000034854	MFSD12	1.099	5.93941e-09
ENSMUSG00000034858	FAM214A	-1.217	1.06459e-05
ENSMUSG00000034867	ANKRD27	1.382	1.07647e-24
ENSMUSG00000034871	FAM151A	4.454	2.42015e-14
ENSMUSG00000034872	GIPC3	-1.07	0.0293578
ENSMUSG00000034883	LRR1	4.593	6.33362e-10
ENSMUSG00000034906	NCAPH	3.463	3.49653e-70
ENSMUSG00000034957	CEBPA	-1.201	0.00481465
ENSMUSG00000034959	RUBCNL	-1.114	0.000477809
ENSMUSG00000034990	OTOA	3.386	3.07998e-18
ENSMUSG00000034993	VAT1	1.014	0.000214499
ENSMUSG00000034997	HTR2A	3.144	1.88283e-05
ENSMUSG00000035024	NCAPD3	1.048	7.21301e-09
ENSMUSG00000035064	EEF2K	2.056	1.48464e-38
ENSMUSG00000035164	ZC3H12C	1.168	8.64749e-05
ENSMUSG00000035198	TUBG1	1.129	5.38111e-08
ENSMUSG00000035206	SPPL2B	1.273	8.07355e-14
ENSMUSG00000035239	NEU3	1.304	2.74479e-12
ENSMUSG00000035284	VPS13C	1.078	1.48065e-07
ENSMUSG00000035351	NUP37	1.115	1.11381e-06
ENSMUSG00000035378	SHQ1	1.058	4.17328e-05
ENSMUSG00000035413	TMEM98	3.689	9.94427e-08
ENSMUSG00000035441	MYO1D	1.458	0.0282831
ENSMUSG00000035443	THYN1	1.315	1.1113e-07
ENSMUSG00000035455	FIGNL1	4.055	2.04744e-87
ENSMUSG00000035458	TNNI3	3.285	1.78045e-17
ENSMUSG00000035504	REEP6	2.671	0.0020257
ENSMUSG00000035594	CHRNA5	8.26	3.40641e-50
ENSMUSG00000035629	RUBCN	-1.037	0.00165997
ENSMUSG00000035704	ALG8	1.291	1.70466e-10
ENSMUSG00000035711	DOK3	-1.228	4.98604e-05
ENSMUSG00000035783	ACTA2	-1.583	0.043074
ENSMUSG00000035849	KRT222	1.022	0.0107034
ENSMUSG00000035891	CERK	-1.602	0.000127704
ENSMUSG00000035914	CD276	2.539	2.18592e-16
ENSMUSG00000035936	ALDH5A1	3.105	3.62087e-27
ENSMUSG00000035960	APEX1	1.363	1.0473e-09
ENSMUSG00000035969	RUSC2	1.331	0.0245866
ENSMUSG00000036027	1810046K07RIK	3.281	1.05113e-15
ENSMUSG00000036106	PRR5	-1.244	0.00074021
ENSMUSG00000036109	MBNL3	1.232	1.74795e-15
ENSMUSG00000036136	FAM110C	3.318	1.10343e-08
ENSMUSG00000036151	TM6SF2	1.526	0.000626871
ENSMUSG00000036158	PRICKLE1	2.522	1.95002e-07
ENSMUSG00000036172	CD200R3	3.141	2.60516e-19
ENSMUSG00000036185	SAPCD1	4.377	2.60551e-51
ENSMUSG00000036223	SKA1	4.689	4.70982e-18
ENSMUSG00000036273	LRRK2	-1.132	0.00247549
ENSMUSG00000036381	P2RY14	3.482	9.50035e-37
ENSMUSG00000036459	WTIP	4.387	1.29864e-12
ENSMUSG00000036469	2019-03-01	-1.15	0.000401126
ENSMUSG00000036473	TBC1D24	3.565	9.54161e-46
ENSMUSG00000036533	CDC42EP3	1.002	1.97078e-07
ENSMUSG00000036553	SH3TC1	-1.198	7.41251e-05
ENSMUSG00000036620	MGAT4B	1.62	3.47364e-09
ENSMUSG00000036639	NUDT1	1.24	3.11187e-10
ENSMUSG00000036661	DENND3	-1.509	8.20595e-06
ENSMUSG00000036676	TMTC3	1.787	7.30366e-13
ENSMUSG00000036718	MICALL2	2.568	0.000111895
ENSMUSG00000036768	KIF15	2.313	7.11515e-05
ENSMUSG00000036777	ANLN	2.396	5.62995e-05
ENSMUSG00000036781	RPS27L	1.318	1.97718e-10
ENSMUSG00000036814	SLC6A20A	5.533	2.9132e-19
ENSMUSG00000036860	MRPL55	1.125	2.65227e-07
ENSMUSG00000036863	SYDE2	3.694	1.11075e-46
ENSMUSG00000036882	ARHGAP33	1.699	7.75353e-11
ENSMUSG00000037010	APLN	-1.693	0.0047679
ENSMUSG00000037020	WDR62	1.329	2.11271e-13
ENSMUSG00000037031	TSPAN15	4.221	1.99192e-14
ENSMUSG00000037032	APBB1	-1.213	0.0462205
ENSMUSG00000037071	SCD1	-1.129	0.00739639
ENSMUSG00000037126	PSD	-1.028	0.0478824
ENSMUSG00000037217	SYN1	-1.65	0.0351904
ENSMUSG00000037225	FGF2	4.629	5.70574e-20
ENSMUSG00000037278	TMEM97	1.883	2.65533e-19
ENSMUSG00000037313	TACC3	1.837	6.55252e-25
ENSMUSG00000037341	SLC9A7	-1.196	6.70224e-05
ENSMUSG00000037347	CHST7	1.642	4.49128e-05
ENSMUSG00000037349	NUDT22	1.119	2.45619e-07
ENSMUSG00000037406	HTRA4	-1.974	0.0100324
ENSMUSG00000037419	ENDOD1	1.712	0.00261259
ENSMUSG00000037451	SLC22A20	-3.844	0.00303382
ENSMUSG00000037474	DTL	4.707	3.84594e-68
ENSMUSG00000037482	ERV3	6.003	4.24929e-18
ENSMUSG00000037499	NENF	1.871	8.31565e-20
ENSMUSG00000037544	DLGAP5	2.117	5.63653e-22
ENSMUSG00000037548	H2-DMB2	-1.043	0.00639407
ENSMUSG00000037572	WDHD1	1.196	3.70777e-15
ENSMUSG00000037605	ADGRL3	1.237	0.0235991
ENSMUSG00000037681	ESYT3	2.439	0.00179709
ENSMUSG00000037710	CISD1	1.707	5.51857e-23
ENSMUSG00000037725	CKAP2	3.133	9.90002e-15
ENSMUSG00000037872	ACKR1	3.171	6.94092e-05
ENSMUSG00000037904	ANKRD9	1.836	6.41648e-23
ENSMUSG00000037905	BRI3BP	1.179	1.49909e-13
ENSMUSG00000037922	BANK1	-1.198	0.000838451
ENSMUSG00000037972	SNN	-1.282	3.8917e-05
ENSMUSG00000037991	RMI2	1.279	3.25491e-08
ENSMUSG00000038005	HPF1	1.119	1.42282e-09
ENSMUSG00000038020	RAPGEFL1	-1.649	0.0022335
ENSMUSG00000038102	TRAPPC11	1.11	1.6231e-20
ENSMUSG00000038143	STOX2	5.406	3.49242e-48
ENSMUSG00000038152	5033430I15RIK	2.028	5.15071e-07
ENSMUSG00000038175	MYLIP	-1.016	0.000256261
ENSMUSG00000038227	HOXA9	5.806	1.52759e-22
ENSMUSG00000038236	HOXA7	5.586	1.96335e-86
ENSMUSG00000038252	NCAPD2	1.989	3.25041e-44
ENSMUSG00000038253	HOXA5	3.557	9.91791e-22
ENSMUSG00000038331	SATB2	-1.086	0.0134927
ENSMUSG00000038349	PLCL1	1.284	3.49348e-07
ENSMUSG00000038379	TTK	3.254	2.04523e-11
ENSMUSG00000038403	HFE2	3.545	4.7808e-06
ENSMUSG00000038421	FCRLA	-1.107	0.0126449
ENSMUSG00000038482	TFDP1	1.978	2.20692e-27
ENSMUSG00000038517	TBKBP1	-1.095	0.0142668
ENSMUSG00000038540	TMC3	1.34	0.000516357
ENSMUSG00000038587	AKAP12	-1.7	4.64061e-05
ENSMUSG00000038604	RIPOR1	1.758	2.71232e-16
ENSMUSG00000038630	ZKSCAN16	-1.776	0.0108021
ENSMUSG00000038670	MYBPC2	-2.576	1.46239e-07
ENSMUSG00000038725	PKHD1L1	4.818	1.99192e-14
ENSMUSG00000038793	LEFTY1	2.655	3.04436e-14
ENSMUSG00000038936	SCCPDH	3.113	1.94777e-45
ENSMUSG00000038943	PRC1	1.969	0.00144977
ENSMUSG00000038982	BLOC1S5	1.493	1.30576e-15
ENSMUSG00000038997	ASB17	8.618	1.4101e-60
ENSMUSG00000039013	SIGLECF	1.445	0.00572852
ENSMUSG00000039037	ST6GALNAC5	4.337	5.20196e-18
ENSMUSG00000039055	EME1	3.044	1.07516e-24
ENSMUSG00000039067	PSMD7	1.077	2.08087e-13
ENSMUSG00000039103	NEXN	4.147	6.9719e-09
ENSMUSG00000039115	ITGA9	5.518	5.78288e-130
ENSMUSG00000039163	CMC1	1.011	3.02096e-07
ENSMUSG00000039187	FANCI	1.621	2.37347e-14
ENSMUSG00000039197	ADK	2.096	1.4733e-19
ENSMUSG00000039308	NDST2	2.427	2.76586e-38
ENSMUSG00000039328	RNF122	-1.202	0.000497323
ENSMUSG00000039377	HLX	-1.271	0.0136612
ENSMUSG00000039396	NEIL3	3.634	4.9536e-19
ENSMUSG00000039470	ZDHHC2	1.243	0.00277571
ENSMUSG00000039481	NRTN	5.869	2.42122e-30
ENSMUSG00000039512	UHRF1BP1	2.09	3.77263e-50
ENSMUSG00000039530	TUSC3	1.107	8.92089e-13
ENSMUSG00000039640	MRPL12	1.265	1.48828e-09
ENSMUSG00000039682	LAP3	1.306	2.86491e-14
ENSMUSG00000039713	PLEKHG5	1.597	5.88675e-16
ENSMUSG00000039715	WDR34	1.911	6.70229e-15
ENSMUSG00000039735	FNBP1L	1.911	0.00302636
ENSMUSG00000039741	BAHCC1	3.798	4.68155e-76
ENSMUSG00000039748	EXO1	2.906	8.38444e-56
ENSMUSG00000039783	KMO	-1.547	0.00015537
ENSMUSG00000039787	CERCAM	1.96	4.26116e-05
ENSMUSG00000039824	MYL6B	1.412	0.00145981
ENSMUSG00000039943	PLCB4	1.661	0.00309774
ENSMUSG00000039994	TIMELESS	1.211	5.35071e-13
ENSMUSG00000040016	PTGER3	2.837	1.33828e-06
ENSMUSG00000040034	NUP43	1.025	1.90656e-07
ENSMUSG00000040046	TPH1	8.302	1.14782e-24
ENSMUSG00000040147	MAOB	2.956	9.45005e-06
ENSMUSG00000040183	ANKRD6	4.382	5.26478e-47
ENSMUSG00000040189	CCDC114	1.144	3.43821e-05
ENSMUSG00000040204	PCLAF	4.661	2.91066e-49
ENSMUSG00000040265	DNM3	1.364	0.00409439
ENSMUSG00000040269	MRPS28	1.177	2.85798e-09
ENSMUSG00000040270	BACH2	-1.164	0.000807159
ENSMUSG00000040274	CDK6	1.325	1.78541e-06
ENSMUSG00000040312	CCHCR1	1.893	5.23269e-26
ENSMUSG00000040350	TRIM7	-1.113	0.00225828
ENSMUSG00000040354	MARS	1.106	1.79362e-13
ENSMUSG00000040415	DTX3	1.869	5.15438e-27
ENSMUSG00000040488	LTBP4	4.226	3.92178e-24
ENSMUSG00000040495	CHRM4	3.663	4.17072e-12
ENSMUSG00000040563	PLPPR2	-1.053	0.0347238
ENSMUSG00000040592	CD79B	-1.025	0.0322105
ENSMUSG00000040621	GEMIN8	1.475	1.73121e-06
ENSMUSG00000040694	APOBEC2	1.526	2.0239e-05
ENSMUSG00000040732	ERG	5.34	1.18983e-65
ENSMUSG00000040749	SIAH1B	1.101	8.64749e-05
ENSMUSG00000040751	LAT2	-1.113	7.20576e-05
ENSMUSG00000040829	ZMYND15	-1.578	0.0277056
ENSMUSG00000040841	SIX5	2.172	3.70525e-07
ENSMUSG00000040855	REPS2	2.239	0.000999791
ENSMUSG00000040860	CROCC	-1.092	1.26585e-05
ENSMUSG00000040867	BEGAIN	-1.204	0.014823
ENSMUSG00000040899	CCR6	-1.082	0.0102892
ENSMUSG00000040918	SLC19A2	1.06	1.82951e-07
ENSMUSG00000040950	MGL2	1.489	0.0370115
ENSMUSG00000040957	CABLES1	2.893	1.30044e-17
ENSMUSG00000040998	NPNT	5.862	8.6236e-42
ENSMUSG00000041064	PIF1	4.092	5.06301e-26
ENSMUSG00000041075	FZD7	1.08	0.000988558
ENSMUSG00000041134	CYYR1	6.294	7.9932e-24
ENSMUSG00000041147	BRCA2	1.231	2.52248e-09
ENSMUSG00000041180	HECTD2	1.386	6.33955e-07
ENSMUSG00000041237	PKLR	7.867	1.28799e-12
ENSMUSG00000041248	KCNJ1	-1.886	0.000222792
ENSMUSG00000041261	CAR8	3.801	1.35181e-07
ENSMUSG00000041287	SOX15	1.051	0.0476373
ENSMUSG00000041298	KATNAL1	1.055	5.2015e-07
ENSMUSG00000041313	SLC7A1	1.125	1.65036e-08
ENSMUSG00000041329	ATP1B2	5.476	2.3452e-34
ENSMUSG00000041406	BC055324	1.554	2.73772e-17
ENSMUSG00000041431	CCNB1	4.061	1.43504e-48
ENSMUSG00000041506	RRP9	1.122	6.50088e-09
ENSMUSG00000041515	IRF8	-1.315	9.99663e-05
ENSMUSG00000041538	H2-OB	-1.305	0.00136449
ENSMUSG00000041598	CDC42EP4	1.135	3.7347e-06
ENSMUSG00000041859	MCM3	2.003	3.85546e-45
ENSMUSG00000041891	LMAN1	1.07	9.44083e-13
ENSMUSG00000041936	AGRN	1.932	1.39685e-14
ENSMUSG00000041992	RAPGEF5	-1.2	0.00010729
ENSMUSG00000041995	ZBED3	-1.139	0.00109809
ENSMUSG00000042029	NCAPG2	2.928	2.02688e-33
ENSMUSG00000042050	WDR60	2.137	4.21437e-14
ENSMUSG00000042106	INKA1	1.262	0.018579
ENSMUSG00000042155	KLHL23	4.815	1.05057e-51
ENSMUSG00000042210	ABHD14A	1.584	2.04869e-17
ENSMUSG00000042215	BAG2	3.59	2.6799e-42
ENSMUSG00000042225	AMMECR1	1.019	4.00216e-08
ENSMUSG00000042289	HSD3B7	2.526	2.17437e-25
ENSMUSG00000042354	GNL3	1.247	5.91884e-19
ENSMUSG00000042453	RELN	2.316	0.000132813
ENSMUSG00000042462	DCTPP1	2.255	1.07453e-32
ENSMUSG00000042474	FCMR	-1.094	0.0260019
ENSMUSG00000042489	CLSPN	3.706	4.51203e-14
ENSMUSG00000042498	D330045A20RIK	4.573	2.15992e-15
ENSMUSG00000042514	KLHL14	-1.485	0.000456623
ENSMUSG00000042594	SH2B3	-1.165	0.0340188
ENSMUSG00000042606	HIRIP3	1.028	1.50964e-06
ENSMUSG00000042660	WDR55	1.067	4.75965e-08
ENSMUSG00000042680	GAREM1	3.714	6.39557e-07
ENSMUSG00000042684	NPL	5.761	1.18983e-65
ENSMUSG00000042712	TCEAL9	2.291	9.28631e-22
ENSMUSG00000042724	MAP3K9	-1.066	0.000230164
ENSMUSG00000042751	NMNAT2	5.427	1.21816e-101
ENSMUSG00000042807	HECW2	-2.165	0.0202299
ENSMUSG00000042842	SERPINB6B	1.903	1.76381e-11
ENSMUSG00000043051	DISC1	2.247	4.08134e-18
ENSMUSG00000043099	HIC1	2.221	1.33878e-11
ENSMUSG00000043153	ISPD	1.304	8.39688e-05
ENSMUSG00000043154	PPP2R3A	-1.243	0.00120823
ENSMUSG00000043168	4930426D05RIK	-1.732	0.000127279
ENSMUSG00000043219	HOXA6	4.076	6.48781e-16
ENSMUSG00000043243	FAM129C	-1.259	0.00469657
ENSMUSG00000043252	TMEM64	1.276	5.71781e-17
ENSMUSG00000043336	FILIP1L	-1.007	0.00942683
ENSMUSG00000043415	OTUD1	-1.263	1.50111e-05
ENSMUSG00000043419	RNF227	1.094	0.000270698
ENSMUSG00000043487	ACOT6	1.17	0.00270197
ENSMUSG00000043541	CASC1	-1.002	0.0231878
ENSMUSG00000043592	UNC5CL	2.256	1.4955e-38
ENSMUSG00000043635	ADAMTS3	5.101	9.67466e-38
ENSMUSG00000043639	RBM20	3.876	2.12955e-15
ENSMUSG00000043727	F830045P16RIK	2.312	0.000564782
ENSMUSG00000043822	ADAMTSL5	5.815	5.24801e-23
ENSMUSG00000043881	KBTBD7	-1.055	0.00156525
ENSMUSG00000043895	S1PR2	1.383	8.15973e-07
ENSMUSG00000043932	KLRI2	-1.511	0.0127616
ENSMUSG00000043940	WDFY3	1.443	8.66094e-06
ENSMUSG00000043969	EMX2	6.052	1.6588e-07
ENSMUSG00000043993	2900052L18RIK	3.693	2.67094e-23
ENSMUSG00000044005	GLS2	5.25	3.10967e-20
ENSMUSG00000044026	SLC35G1	3.515	1.15433e-54
ENSMUSG00000044056	EFCAB9	-1.417	5.80057e-05
ENSMUSG00000044201	CDC25C	2.959	2.6191e-07
ENSMUSG00000044220	NKX2-3	8.339	2.49115e-30
ENSMUSG00000044252	OSBPL1A	2.142	0.000548875
ENSMUSG00000044303	CDKN2A	3.173	6.17436e-07
ENSMUSG00000044352	SOWAHA	2.465	0.00839938
ENSMUSG00000044433	CAMSAP3	2.67	0.00034265
ENSMUSG00000044453	FFAR1	-2.036	7.40894e-06
ENSMUSG00000044533	RPS2	1.042	6.30571e-11
ENSMUSG00000044534	ACKR2	1.452	2.29608e-05
ENSMUSG00000044694	2010007H06RIK	-1.669	0.000130933
ENSMUSG00000044749	ABCA6	-1.747	0.000514265
ENSMUSG00000044786	ZFP36	-1.098	0.0113654
ENSMUSG00000044934	ZFP367	1.133	2.97875e-11
ENSMUSG00000044966	FBXO48	1.276	1.9922e-08
ENSMUSG00000045031	CETN4	2.464	4.44443e-07
ENSMUSG00000045053	KCNG3	3.878	7.93967e-12
ENSMUSG00000045095	MAGI1	2.693	0.000528164
ENSMUSG00000045216	HS6ST1	1.329	4.63902e-09
ENSMUSG00000045257	MORN2	1.335	6.65809e-05
ENSMUSG00000045273	CENPH	3.159	1.88083e-11
ENSMUSG00000045322	TLR9	-1.045	0.00822705
ENSMUSG00000045328	CENPE	2.6	2.53403e-13
ENSMUSG00000045382	CXCR4	-1.171	0.0129971
ENSMUSG00000045509	GPR150	4.481	1.62158e-30
ENSMUSG00000045608	DBX2	9.728	7.4655e-48
ENSMUSG00000045667	SMTNL2	5.889	1.18593e-37
ENSMUSG00000045672	COL27A1	-1.693	2.06255e-05
ENSMUSG00000045730	ADRB2	-1.453	2.20437e-05
ENSMUSG00000045751	MMS22L	1.286	5.80489e-08
ENSMUSG00000045838	CCDC9B	3.23	1.135e-16
ENSMUSG00000046058	EID2	1.609	0.000100077
ENSMUSG00000046152	FUT10	2.288	8.23319e-06
ENSMUSG00000046159	CHRM3	-2.277	0.00390036
ENSMUSG00000046169	ADAMTS6	-1.061	0.000929073
ENSMUSG00000046179	E2F8	3.153	1.48015e-43
ENSMUSG00000046182	GSG1L	5.098	1.14782e-24
ENSMUSG00000046295	ANKLE1	2.294	2.62303e-07
ENSMUSG00000046314	STXBP6	-1.336	0.011046
ENSMUSG00000046337	FAM178B	9.003	1.56946e-60
ENSMUSG00000046432	BEX3	2.263	3.94378e-27
ENSMUSG00000046442	PPM1E	1.727	6.68015e-08
ENSMUSG00000046490	RNF222	3.837	4.43764e-07
ENSMUSG00000046546	FAM43A	-1.307	1.2032e-06
ENSMUSG00000046567	4930430F08RIK	1.637	1.15269e-15
ENSMUSG00000046572	ZFP518B	-1.206	0.000500544
ENSMUSG00000046591	TICRR	2.799	8.74421e-13
ENSMUSG00000046668	CXXC5	-1.318	0.000313601
ENSMUSG00000046959	SLC26A1	2.932	5.90099e-08
ENSMUSG00000046999	1110032F04RIK	1.324	0.0111075
ENSMUSG00000047003	ZFP41	1.268	1.34045e-10
ENSMUSG00000047037	NIPA1	2.276	0.00380768
ENSMUSG00000047115	FAM221A	1.642	0.000117027
ENSMUSG00000047361	GM973	3.442	2.13262e-21
ENSMUSG00000047369	DNAH14	5.821	7.24823e-09
ENSMUSG00000047394	ODF3B	5.882	4.64657e-46
ENSMUSG00000047409	CTDSPL	1.756	3.26484e-05
ENSMUSG00000047419	CMYA5	-1.208	0.00125271
ENSMUSG00000047443	ERFE	5.811	7.95215e-36
ENSMUSG00000047557	LXN	3.823	1.50042e-35
ENSMUSG00000047631	APOF	-2.13	0.000248763
ENSMUSG00000047671	TCTEX1D4	-1.24	0.0228746
ENSMUSG00000047844	BEX4	7.155	1.67379e-27
ENSMUSG00000047990	C2CD4A	7.472	5.99378e-27
ENSMUSG00000048001	HES5	-1.376	0.0156492
ENSMUSG00000048031	FCRL5	1.337	7.02282e-05
ENSMUSG00000048078	TENM4	4.256	3.43052e-84
ENSMUSG00000048217	NAGS	10.558	6.26091e-79
ENSMUSG00000048218	AMIGO2	2.848	2.8298e-38
ENSMUSG00000048327	CKAP2L	2.116	0.000432152
ENSMUSG00000048376	F2R	1.64	0.000478552
ENSMUSG00000048442	SMIM5	4.255	3.07691e-78
ENSMUSG00000048458	INKA2	3.746	5.80337e-53
ENSMUSG00000048503	TMEM136	2.653	9.27237e-11
ENSMUSG00000048537	PHLDB1	3.768	1.07098e-54
ENSMUSG00000048652	SAMD13	2.066	1.92255e-07
ENSMUSG00000048794	CFAP100	7.227	5.23323e-49
ENSMUSG00000048814	LONRF2	7.959	3.65878e-37
ENSMUSG00000048895	CDK5R1	-1.07	0.00365999
ENSMUSG00000048922	CDCA2	2.977	2.47209e-38
ENSMUSG00000048965	MRGPRE	-1.4	0.000397307
ENSMUSG00000049047	ARMCX3	-1.04	0.0334067
ENSMUSG00000049134	NRAP	1.646	0.0204568
ENSMUSG00000049285	MBLAC1	1.093	0.000265032
ENSMUSG00000049313	SORL1	-1.001	0.0388057
ENSMUSG00000049350	ZG16	6.64	7.03576e-30
ENSMUSG00000049357	4933408B17RIK	-1.299	0.00140333
ENSMUSG00000049404	RARRES1	7.876	7.37486e-40
ENSMUSG00000049511	HTR1B	-2.791	0.00527634
ENSMUSG00000049532	SALL2	1.191	0.000784251
ENSMUSG00000049539	HIST1H1A	3.798	4.37421e-42
ENSMUSG00000049608	GPR55	1.018	0.00154304
ENSMUSG00000049687	PHETA2	3.95	1.07364e-49
ENSMUSG00000049791	FZD4	-1.259	0.0124748
ENSMUSG00000049932	H2AFX	2.084	9.25195e-20
ENSMUSG00000050157	GM867	2.315	0.0182982
ENSMUSG00000050240	HIC2	1.082	5.62995e-05
ENSMUSG00000050382	KIF7	2.841	1.77827e-22
ENSMUSG00000050390	C77080	4.025	2.60014e-10
ENSMUSG00000050410	TCF19	2.193	2.82045e-27
ENSMUSG00000050468	ASTL	-1.742	0.0232464
ENSMUSG00000050534	HTR5B	8.284	4.49634e-66
ENSMUSG00000050549	FAM241A	1.369	1.13237e-09
ENSMUSG00000050556	KCNB1	-1.232	0.0158297
ENSMUSG00000050578	MMP13	2.513	0.00487175
ENSMUSG00000051147	NAT2	1.043	7.87598e-07
ENSMUSG00000051159	CITED1	7.831	3.16301e-25
ENSMUSG00000051220	ERCC6L	1.53	6.52301e-14
ENSMUSG00000051235	GEN1	1.148	2.40343e-06
ENSMUSG00000051236	MSRB3	2.449	3.24463e-05
ENSMUSG00000051278	ZGRF1	1.076	9.60813e-09
ENSMUSG00000051319	MTLN	1.875	5.82219e-18
ENSMUSG00000051331	CACNA1C	3.297	6.15167e-06
ENSMUSG00000051378	KIF18B	4.425	1.7544e-22
ENSMUSG00000051444	BBS12	1.272	5.14275e-09
ENSMUSG00000051457	SPN	1.278	8.84244e-08
ENSMUSG00000051506	WDFY4	-1.099	0.00323057
ENSMUSG00000051517	ARHGEF39	2.599	2.47209e-38
ENSMUSG00000051579	TCEAL8	1.704	0.0354879
ENSMUSG00000051590	MAP3K19	-1.098	0.0111317
ENSMUSG00000051627	HIST1H1E	1.68	1.14627e-06
ENSMUSG00000051804	ADAM6B	-1.693	0.000298935
ENSMUSG00000051817	SOX12	2.31	2.84579e-27
ENSMUSG00000051832	E230016K23RIK	-1.663	0.0205448
ENSMUSG00000051910	SOX6	2.326	0.0158297
ENSMUSG00000051950	B3GLCT	1.524	2.0769e-15
ENSMUSG00000052013	BTLA	-1.271	0.00246961
ENSMUSG00000052271	BHLHA15	-1.147	0.0252236
ENSMUSG00000052336	CX3CR1	-1.009	0.0372967
ENSMUSG00000052373	MPP3	5.616	5.94624e-14
ENSMUSG00000052392	ACOT4	3.859	4.83101e-06
ENSMUSG00000052512	NAV2	2.331	2.31815e-23
ENSMUSG00000052534	PBX1	1.211	0.000288879
ENSMUSG00000052565	HIST1H1D	3.461	1.00779e-31
ENSMUSG00000052616	TERB1	-1.071	0.0230836
ENSMUSG00000052713	ZFP608	-1.204	6.6535e-05
ENSMUSG00000052852	REEP1	2.025	0.0207273
ENSMUSG00000052889	PRKCB	-1.007	0.00174725
ENSMUSG00000052926	RNASEH2A	1.194	1.41466e-18
ENSMUSG00000052955	CPVL	9.773	1.10126e-84
ENSMUSG00000053101	GPR141	-1.134	0.0413201
ENSMUSG00000053121	GM5129	-1.639	0.0271234
ENSMUSG00000053137	MAPK11	-1.056	8.36555e-05
ENSMUSG00000053166	CDH22	-2.719	0.00085034
ENSMUSG00000053198	PRX	1.7	4.15568e-07
ENSMUSG00000053588	A730061H03RIK	-1.062	0.0307939
ENSMUSG00000053702	NEBL	2.105	4.46049e-08
ENSMUSG00000053897	SLC39A8	2.865	2.16606e-07
ENSMUSG00000053931	CNN3	-1.271	0.000424802
ENSMUSG00000053963	STUM	-1.476	0.0100479
ENSMUSG00000054000	TUSC1	1.169	0.0332778
ENSMUSG00000054181	A930012O16RIK	-1.071	0.00683192
ENSMUSG00000054191	KLF1	7.342	3.58384e-44
ENSMUSG00000054203	IFI205	-1.556	0.0161681
ENSMUSG00000054342	KCNN4	1.944	1.16955e-24
ENSMUSG00000054383	PNMA1	-1.323	0.00870224
ENSMUSG00000054408	SPCS3	1.15	4.18305e-14
ENSMUSG00000054520	SH3BP2	-1.05	0.000399324
ENSMUSG00000054640	SLC8A1	1.267	2.45873e-07
ENSMUSG00000054679	SRSF12	1.736	0.000201898
ENSMUSG00000054717	HMGB2	1.314	0.000164107
ENSMUSG00000054932	AFP	-1.101	0.00901666
ENSMUSG00000054999	NAALADL1	2.607	0.00145392
ENSMUSG00000055003	LRTM2	-1.134	0.0295559
ENSMUSG00000055184	FAM72A	1.352	0.000102161
ENSMUSG00000055210	FOXD2	1.532	8.5227e-10
ENSMUSG00000055312	THEM7	7.014	4.07599e-50
ENSMUSG00000055407	MAP6	1.064	0.0332352
ENSMUSG00000055485	SOGA1	2.043	3.07998e-18
ENSMUSG00000055538	ZCCHC24	-1.039	0.00054425
ENSMUSG00000055612	CDCA7	2.76	2.83302e-63
ENSMUSG00000055745	RTL6	-1.277	2.29608e-05
ENSMUSG00000055945	PRR18	-1.17	0.0214363
ENSMUSG00000055980	IRS1	-2.22	0.00773225
ENSMUSG00000056025	CLCA3A1	1.973	0.0308893
ENSMUSG00000056043	RGS9BP	2.137	7.9905e-05
ENSMUSG00000056124	B4GALT6	1.851	0.000605573
ENSMUSG00000056174	COL8A2	-2.92	0.00100978
ENSMUSG00000056367	ACTR3B	4.272	5.30744e-76
ENSMUSG00000056394	LIG1	2.58	1.53685e-67
ENSMUSG00000056612	PPP1R14B	1.537	1.40584e-16
ENSMUSG00000056666	RETSAT	2.683	8.46007e-44
ENSMUSG00000056671	PRELID2	2.973	3.33444e-17
ENSMUSG00000056699	GM5533	-1.518	0.0422421
ENSMUSG00000056904	GM5620	2.088	6.90703e-07
ENSMUSG00000056947	MAB21L1	7.054	6.03195e-06
ENSMUSG00000057098	EBF1	-1.544	2.27558e-05
ENSMUSG00000057135	SCIMP	-1.382	0.000686374
ENSMUSG00000057337	CHST3	-1.625	7.03163e-05
ENSMUSG00000057541	PUS7	1.077	4.75254e-10
ENSMUSG00000057606	COLQ	-1.17	0.000570125
ENSMUSG00000057777	MAB21L2	7.495	4.76295e-78
ENSMUSG00000058183	MMEL1	3.038	0.00104422
ENSMUSG00000058290	ESPL1	1.785	0.00345502
ENSMUSG00000058318	PHF21A	-1.005	0.0325853
ENSMUSG00000058351	SMIM4	1.202	5.26653e-05
ENSMUSG00000058385	HIST1H2BG	2.755	2.01546e-44
ENSMUSG00000058626	CAPN11	-5.131	0.0298175
ENSMUSG00000058756	THRA	1.259	1.31728e-13
ENSMUSG00000058773	HIST1H1B	5.339	2.19782e-94
ENSMUSG00000058833	REX1BD	1.057	2.56555e-11
ENSMUSG00000059027	9630013D21RIK	3.659	2.86636e-29
ENSMUSG00000059060	RAD51B	2.278	4.81845e-10
ENSMUSG00000059277	R74862	-1.729	0.0264639
ENSMUSG00000059278	NAA38	1.17	4.73135e-11
ENSMUSG00000059336	SLC14A1	1.16	0.000951205
ENSMUSG00000059363	FXN	1.402	3.34139e-18
ENSMUSG00000059479	B3GNT8	-1.478	1.21866e-05
ENSMUSG00000059493	NHS	2.675	1.81282e-06
ENSMUSG00000059689	ZFP637	1.286	1.19839e-12
ENSMUSG00000059901	ADAMTS14	-1.956	0.000250541
ENSMUSG00000059994	FCRL1	-1.321	0.0007783
ENSMUSG00000060002	CHPT1	1.104	0.000170661
ENSMUSG00000060093	HIST1H4A	3.513	4.75259e-57
ENSMUSG00000060572	MFAP2	-2.845	0.0444059
ENSMUSG00000060678	HIST1H4C	2.038	4.105e-17
ENSMUSG00000060771	TSGA10	-1.315	0.00596283
ENSMUSG00000060798	INTU	-2.237	0.0344941
ENSMUSG00000060981	HIST1H4H	1.833	1.68065e-09
ENSMUSG00000061013	MKX	4.784	2.00744e-07
ENSMUSG00000061068	MCPT4	6.133	3.51778e-15
ENSMUSG00000061132	BLNK	-1.031	0.00361796
ENSMUSG00000061353	CXCL12	5.026	5.84347e-13
ENSMUSG00000061356	NUGGC	-1.847	0.00765805
ENSMUSG00000061436	HIPK2	1.285	0.0185218
ENSMUSG00000061482	HIST1H4D	2.497	1.76218e-29
ENSMUSG00000061518	COX5B	1.086	5.8317e-15
ENSMUSG00000061615	HIST1H2AB	4.334	7.11259e-66
ENSMUSG00000061723	TNNT3	-1.58	0.0325853
ENSMUSG00000061878	SPHK1	3.648	0.000617962
ENSMUSG00000061981	FLOT2	1.197	0.000263643
ENSMUSG00000061991	HIST1H2AF	5.617	3.21255e-63
ENSMUSG00000062028	IRGC1	-1.984	1.03421e-05
ENSMUSG00000062046	5730460C07RIK	4.838	7.28569e-19
ENSMUSG00000062082	CD200R4	2.533	3.98011e-22
ENSMUSG00000062190	LANCL2	1.571	1.2674e-24
ENSMUSG00000062248	CKS2	1.517	9.15454e-05
ENSMUSG00000062380	TUBB3	1.105	0.00686419
ENSMUSG00000062510	NSL1	2.24	1.82628e-27
ENSMUSG00000062524	NCR1	-1.477	0.0291283
ENSMUSG00000062638	BTNL1	-1.978	0.000776124
ENSMUSG00000062661	NCS1	6.097	3.01374e-78
ENSMUSG00000062727	HIST1H2BK	5.738	3.78595e-88
ENSMUSG00000062729	PPOX	1.58	1.52759e-22
ENSMUSG00000063021	HIST1H2AK	3.932	6.26091e-79
ENSMUSG00000063445	NMRAL1	1.765	2.49219e-14
ENSMUSG00000063522	2010109I03RIK	-1.747	0.00464105
ENSMUSG00000063689	HIST2H2AB	2.31	3.26684e-11
ENSMUSG00000063810	ALMS1	1.006	0.0160164
ENSMUSG00000064032	GM10143	1.693	1.84845e-05
ENSMUSG00000064168	NA	4.514	1.11371e-82
ENSMUSG00000064215	IFI27	1.088	0.000695215
ENSMUSG00000064267	HVCN1	-1.277	0.000929073
ENSMUSG00000064288	HIST1H4K	4.25	5.5217e-75
ENSMUSG00000064326	SIVA1	1.482	5.77086e-13
ENSMUSG00000065036	GM22362	1.491	0.00330022
ENSMUSG00000065265	GM23455	1.167	9.53855e-05
ENSMUSG00000065444	MIR27A	-1.581	0.0100298
ENSMUSG00000065808	GM23037	-1.394	0.00763173
ENSMUSG00000066191	ANKS6	2.014	0.00558406
ENSMUSG00000066197	GPR139	7.771	3.43576e-43
ENSMUSG00000066643	WDR35	1.662	5.26003e-09
ENSMUSG00000066867	OAS1E	2.3	0.00336297
ENSMUSG00000066894	VSIG10	1.578	7.02282e-05
ENSMUSG00000067336	BMPR2	1.182	4.09455e-05
ENSMUSG00000067341	H2-EB2	-1.274	0.000846245
ENSMUSG00000067455	HIST1H4J	3.801	8.5339e-49
ENSMUSG00000067629	SYNGAP1	3.36	1.47325e-53
ENSMUSG00000068079	TCF15	8.613	2.86602e-42
ENSMUSG00000068101	CENPM	3.264	2.3548e-32
ENSMUSG00000068105	TNFRSF13C	-1.576	2.39561e-05
ENSMUSG00000068115	NINL	3.584	9.53607e-10
ENSMUSG00000068129	CST7	1.425	4.39925e-09
ENSMUSG00000068417	PNP2	2.89	7.75353e-11
ENSMUSG00000068735	TRP53I11	-1.256	0.00148163
ENSMUSG00000068744	PSRC1	3.468	6.14563e-20
ENSMUSG00000068855	HIST2H2AC	1.868	3.79864e-13
ENSMUSG00000068874	SELENBP1	2.451	2.75985e-05
ENSMUSG00000069114	ZBTB10	-1.053	0.00212439
ENSMUSG00000069265	HIST1H3A	3	2.22062e-34
ENSMUSG00000069266	HIST1H4B	3.497	6.43003e-27
ENSMUSG00000069267	HIST1H3B	4.931	3.97855e-33
ENSMUSG00000069268	HIST1H2BF	2.305	9.08405e-15
ENSMUSG00000069272	HIST1H2AE	3.558	5.32373e-46
ENSMUSG00000069273	HIST1H3E	2.194	6.99185e-18
ENSMUSG00000069274	HIST1H4F	5.222	8.12324e-106
ENSMUSG00000069300	HIST1H2BJ	3.652	8.72055e-35
ENSMUSG00000069301	HIST1H2AG	4.558	2.0224e-48
ENSMUSG00000069302	HIST1H2AH	6.399	9.82241e-66
ENSMUSG00000069308	HIST1H2BP	3.05	2.65227e-07
ENSMUSG00000069309	HIST1H2AN	3.923	3.71477e-44
ENSMUSG00000069310	HIST1H3C	5.839	4.87717e-85
ENSMUSG00000069515	LYZ1	-1.601	0.00870671
ENSMUSG00000069814	CCDC92B	2.162	0.0288265
ENSMUSG00000069910	SPDL1	1.638	7.92523e-13
ENSMUSG00000070436	SERPINH1	-4.101	0.0126307
ENSMUSG00000070498	TMEM132B	-1.277	0.0222992
ENSMUSG00000070524	FCRLB	-1.769	0.00458253
ENSMUSG00000070526	PEG12	1.861	0.00618132
ENSMUSG00000070576	MN1	4.08	1.5849e-28
ENSMUSG00000070730	RMDN3	2.087	3.7898e-51
ENSMUSG00000070803	CITED4	3.045	3.21185e-09
ENSMUSG00000070980	ACTL7B	-2.258	0.0177309
ENSMUSG00000071014	NDUFB6	1.205	9.6156e-10
ENSMUSG00000071041	IMPDH2-PS	1.343	2.23684e-05
ENSMUSG00000071042	RASGRP3	-1.058	0.000384441
ENSMUSG00000071226	CECR2	-1.333	0.0056154
ENSMUSG00000071478	HIST1H2AD	2.511	1.32345e-18
ENSMUSG00000071516	HIST1H2AI	2.457	9.55067e-15
ENSMUSG00000071547	NT5DC2	3.838	2.21469e-30
ENSMUSG00000071636	RIMBP3	2.109	3.11098e-08
ENSMUSG00000071648	ROM1	3.196	1.89248e-51
ENSMUSG00000071669	SNX29	-1.051	0.000143129
ENSMUSG00000071713	CSF2RB	1.389	0.00462016
ENSMUSG00000071714	CSF2RB2	2.748	9.57533e-14
ENSMUSG00000071722	SPIN4	6.171	5.67811e-29
ENSMUSG00000072082	CCNF	2.375	5.09403e-15
ENSMUSG00000072109	A530040E14RIK	-1.098	0.00440961
ENSMUSG00000072612	GM10382	-1.736	0.0155588
ENSMUSG00000072673	GM10392	-1.08	0.0101199
ENSMUSG00000072704	SMIM10L1	1.069	1.1165e-10
ENSMUSG00000072721	KLRA14-PS	-1.843	0.0429578
ENSMUSG00000072812	AHNAK2	2.92	4.84521e-08
ENSMUSG00000072980	OIP5	2.792	1.0292e-06
ENSMUSG00000073002	VAMP5	3.332	6.07746e-99
ENSMUSG00000073295	NUDT11	7.233	1.24595e-27
ENSMUSG00000073418	C4B	2.561	0.0019778
ENSMUSG00000073430	GM10505	-1.023	0.0136522
ENSMUSG00000073471	RSPH3A	1.028	0.000274444
ENSMUSG00000073628	GM10552	-1.196	0.00206765
ENSMUSG00000073678	PGAP1	-1.286	0.00154013
ENSMUSG00000073787	GM10575	-1.723	0.0283447
ENSMUSG00000074039	4930520O04RIK	3.551	2.98301e-23
ENSMUSG00000074052	BC048644	1.115	0.0120969
ENSMUSG00000074203	G430095P16RIK	1.82	2.70087e-17
ENSMUSG00000074256	GM10655	-1.439	0.0366568
ENSMUSG00000074259	GRAMD2	1.67	0.0059966
ENSMUSG00000074403	HIST2H3B	2.513	4.2656e-17
ENSMUSG00000074476	SPC24	2.776	5.10165e-06
ENSMUSG00000074682	ZCCHC3	1.47	5.58741e-10
ENSMUSG00000074783	AU019990	-1.515	0.0200775
ENSMUSG00000074785	PLXNC1	1.007	5.13587e-10
ENSMUSG00000074794	ARRDC3	-1.059	0.00179055
ENSMUSG00000074796	SLC4A11	-1.398	0.00064179
ENSMUSG00000074867	ZFP808	1.778	1.41221e-07
ENSMUSG00000074899	SPTBN5	-1.445	0.00194801
ENSMUSG00000074923	PAK6	3.47	5.78771e-24
ENSMUSG00000075029	4930558J22RIK	3.562	7.60567e-20
ENSMUSG00000075031	HIST1H2BB	4.28	3.3066e-85
ENSMUSG00000075225	CCDC162	1.472	0.000254022
ENSMUSG00000075266	CENPW	3.052	3.1472e-30
ENSMUSG00000075271	TTC30A1	-1.087	0.0163273
ENSMUSG00000075289	CARNS1	-1.56	1.2488e-06
ENSMUSG00000075334	RPRM	8.911	2.67749e-68
ENSMUSG00000075394	HOXC4	8.42	2.58113e-34
ENSMUSG00000075408	6030408B16RIK	-2.16	0.00847898
ENSMUSG00000075420	SMIM6	3.231	1.11018e-19
ENSMUSG00000075590	NRBP2	3.27	2.38952e-12
ENSMUSG00000075592	NYNRIN	1.782	1.66491e-07
ENSMUSG00000075605	SLURP2	-3.44	0.0284538
ENSMUSG00000075703	SELENOI	1.073	4.77227e-15
ENSMUSG00000076431	SOX4	-1.276	0.000425218
ENSMUSG00000076435	ACSF2	-1.138	0.000712437
ENSMUSG00000076441	ASS1	1.835	4.96393e-20
ENSMUSG00000076469	TRBV13-2	1.067	0.000594396
ENSMUSG00000076508	IGKV17-127	-1.378	0.0121258
ENSMUSG00000076512	IGKV9-123	-1.139	0.0396242
ENSMUSG00000076514	IGKV17-121	-1.066	0.0409289
ENSMUSG00000076522	IGKV16-104	-1.6	0.000338337
ENSMUSG00000076523	IGKV15-103	-1.437	0.00210631
ENSMUSG00000076525	IGKV1-99	-1.673	0.00265266
ENSMUSG00000076526	IGKV12-98	-1.289	0.00912473
ENSMUSG00000076531	IGKV4-92	-1.36	0.0179466
ENSMUSG00000076534	IGKV12-89	1.444	0.039587
ENSMUSG00000076538	IGKV13-84	-1.311	0.0198313
ENSMUSG00000076540	IGKV4-80	-1.128	0.0417658
ENSMUSG00000076545	IGKV4-72	-1.205	0.00505087
ENSMUSG00000076548	IGKV4-69	-1.609	0.00360415
ENSMUSG00000076549	IGKV4-68	-1.023	0.0428961
ENSMUSG00000076555	IGKV4-57-1	-1.007	0.0368502
ENSMUSG00000076556	IGKV4-57	-1.144	0.0142409
ENSMUSG00000076562	IGKV4-50	-1.281	0.014281
ENSMUSG00000076563	IGKV5-48	-1.038	0.0201343
ENSMUSG00000076564	IGKV12-46	-1.096	0.0204273
ENSMUSG00000076576	IGKV6-32	-1.158	0.0175607
ENSMUSG00000076577	IGKV8-30	-1.328	0.00512873
ENSMUSG00000076586	IGKV8-21	-1.09	0.021221
ENSMUSG00000076596	IGKV3-10	-1.126	0.0227138
ENSMUSG00000076605	IGKJ2	-1.011	0.0298252
ENSMUSG00000076607	IGKJ4	-1.369	0.00828634
ENSMUSG00000076608	IGKJ5	-1.083	0.0438538
ENSMUSG00000076609	IGKC	-1.059	0.0282699
ENSMUSG00000076618	IGHJ4	-1.231	0.00302118
ENSMUSG00000076619	IGHJ3	-1.171	0.0279312
ENSMUSG00000076620	IGHJ2	-1.072	0.0126738
ENSMUSG00000076633	IGHV5-2	-1.802	0.000104208
ENSMUSG00000076655	IGHV4-1	-1.316	0.00218511
ENSMUSG00000076665	IGHV7-1	-1.421	0.00639407
ENSMUSG00000076672	IGHV3-6	-1.169	0.00492439
ENSMUSG00000076674	IGHV3-8	-1.24	0.00287769
ENSMUSG00000076676	IGHV12-3	1.258	0.000689754
ENSMUSG00000076680	IGHV6-6	-1.074	0.00184785
ENSMUSG00000076695	IGHV1-18	-1.78	0.000180595
ENSMUSG00000076709	IGHV1-47	-1.662	0.000282447
ENSMUSG00000076731	IGHV8-12	-1.346	0.00291261
ENSMUSG00000076749	TCRG-C1	1.057	0.015952
ENSMUSG00000076752	TCRG-C2	1.181	0.00147386
ENSMUSG00000076754	TRGV2	1.282	0.00125702
ENSMUSG00000076757	TCRG-C4	1.231	0.00193506
ENSMUSG00000076939	IGLV3	-1.418	0.000720202
ENSMUSG00000078349	AW011738	1.673	4.35721e-10
ENSMUSG00000078350	SMIM1	4.496	1.03093e-17
ENSMUSG00000078451	PPIL6	-2.155	0.00678096
ENSMUSG00000078486	PERM1	1.723	1.91969e-09
ENSMUSG00000078521	AUNIP	5.472	8.21623e-61
ENSMUSG00000078566	BNIP3	-1.266	0.00734955
ENSMUSG00000078695	CISD3	-1.05	0.00126931
ENSMUSG00000078812	EIF5A	1.445	1.54397e-22
ENSMUSG00000078816	PRKCG	-1.253	0.00746748
ENSMUSG00000078870	GM14410	1.802	2.56315e-07
ENSMUSG00000078941	AK6	1.08	3.71241e-08
ENSMUSG00000079037	PRNP	2.434	0.00344399
ENSMUSG00000079298	KLRB1B	-2.16	0.00133252
ENSMUSG00000079543	IGKV13-85	-1.713	0.0291505
ENSMUSG00000079550	MPP4	1.216	0.00268139
ENSMUSG00000079553	KIFC1	2.243	6.4007e-08
ENSMUSG00000079560	HOXA3	2.906	2.63447e-12
ENSMUSG00000079654	PRRT4	6.669	3.30404e-54
ENSMUSG00000079685	ULBP1	1.769	1.37332e-13
ENSMUSG00000079852	KLRA4	-2.374	0.00202223
ENSMUSG00000080712	HIST3H2BB-PS	2.061	3.73468e-16
ENSMUSG00000080772	GM12543	-1.638	0.00399528
ENSMUSG00000081078	GM12568	-1.352	0.0308395
ENSMUSG00000081339	GM16044	-1.28	0.0254786
ENSMUSG00000081511	GM11475	-5.367	0.00323519
ENSMUSG00000081564	GM13717	4.425	2.04869e-17
ENSMUSG00000081648	GM13423	-1.276	0.000330271
ENSMUSG00000082057	GM15789	-1.404	0.0386358
ENSMUSG00000082154	GM16464	-1.051	0.0278322
ENSMUSG00000082163	GM14276	1.058	0.000913974
ENSMUSG00000082509	NA	-1.582	0.000965606
ENSMUSG00000083083	GM15382	-1.14	0.00495542
ENSMUSG00000083087	GM11249	1.224	0.00372001
ENSMUSG00000083165	GM11344	-1.958	0.00281865
ENSMUSG00000083822	HMGB1-PS5	-1.111	0.00683192
ENSMUSG00000083953	GM14049	-1.075	0.0393325
ENSMUSG00000083979	GM12527	-1.44	0.0102206
ENSMUSG00000084611	GM24371	-1.092	0.0291579
ENSMUSG00000084621	GM25106	-1.18	0.0262339
ENSMUSG00000084773	GM12159	-1.283	0.0251347
ENSMUSG00000084788	GM11342	-1.967	0.00066035
ENSMUSG00000084789	GM12974	-2.264	0.0241886
ENSMUSG00000084821	GM15880	-1.726	0.00169365
ENSMUSG00000084918	GM12708	-1.169	0.0195481
ENSMUSG00000085078	C030013C21RIK	1.296	0.0204273
ENSMUSG00000085110	GM13920	-1.977	0.0240264
ENSMUSG00000085204	GM15327	-1.599	0.0062253
ENSMUSG00000085315	A430018G15RIK	-1.51	0.0197604
ENSMUSG00000085399	FOXD2OS	1.663	9.60105e-18
ENSMUSG00000085417	GM13919	-1.424	0.00642431
ENSMUSG00000085558	4930412C18RIK	3.992	3.39353e-13
ENSMUSG00000085583	NA	3.397	1.85585e-11
ENSMUSG00000085666	GM9855	4.819	7.52466e-26
ENSMUSG00000085704	4921531C22RIK	-1.289	0.00411255
ENSMUSG00000085723	GM15915	4.082	4.4668e-09
ENSMUSG00000085760	GM14302	-1.998	8.77977e-05
ENSMUSG00000085785	SOX5OS3	-1.627	0.0173639
ENSMUSG00000085844	GM11690	-1.903	7.02888e-05
ENSMUSG00000085861	ARMH2	-1.591	0.0145635
ENSMUSG00000085918	GM13032	3.336	4.21908e-23
ENSMUSG00000085971	GM15411	-1.311	0.00328477
ENSMUSG00000086111	GM15326	-1.523	0.00123215
ENSMUSG00000086119	GM2415	1.999	6.14798e-07
ENSMUSG00000086212	MKLN1OS	1.765	6.438e-08
ENSMUSG00000086236	5830418P13RIK	-1.273	0.00605722
ENSMUSG00000086245	GM16170	-1.351	0.00560846
ENSMUSG00000086344	NA	-1.9	0.000282708
ENSMUSG00000086360	GM16214	-2.569	3.27775e-07
ENSMUSG00000086391	1700042O10RIK	4.688	1.45317e-10
ENSMUSG00000086392	MCCC1OS	-2.381	0.0441328
ENSMUSG00000086424	GM15569	-1.862	0.00213988
ENSMUSG00000086438	ASB17OS	2.615	0.0129971
ENSMUSG00000086448	9330162012RIK	2.538	0.000858628
ENSMUSG00000086449	9030204H09RIK	5.974	3.37781e-18
ENSMUSG00000086451	4933431K23RIK	4.834	1.48873e-11
ENSMUSG00000086479	GM16014	-1.027	0.0342701
ENSMUSG00000086534	GM16758	3.701	2.19839e-05
ENSMUSG00000086560	GM13372	5.445	8.94946e-20
ENSMUSG00000086605	NA	-1.453	0.00176307
ENSMUSG00000086712	AI427809	1.667	0.000561296
ENSMUSG00000086952	GM12596	-1.169	0.0476639
ENSMUSG00000087175	GM15133	-1.07	0.00234166
ENSMUSG00000087221	BC037032	-1.409	8.06426e-05
ENSMUSG00000087266	GM15991	-1.701	0.000100103
ENSMUSG00000087340	GM15228	1.799	4.26321e-06
ENSMUSG00000087443	PPP1R18OS	-1.422	0.000334445
ENSMUSG00000087480	GM15910	-1.174	0.0487802
ENSMUSG00000087538	GM16341	-1.525	0.00144401
ENSMUSG00000087593	GM16174	-1.802	0.00578805
ENSMUSG00000087598	ZFP111	1.493	1.2453e-05
ENSMUSG00000087611	4930458D05RIK	-2.286	3.63841e-05
ENSMUSG00000087633	GM14455	-1.215	0.000925076
ENSMUSG00000087684	1200007C13RIK	-2.936	0.0340888
ENSMUSG00000088151	GM26347	-1.211	0.0351807
ENSMUSG00000088299	GM26414	-1.287	0.00315833
ENSMUSG00000088332	GM22847	-1.821	0.000719623
ENSMUSG00000088891	GM22516	-1.479	0.0143434
ENSMUSG00000089683	4930570N18RIK	-1.024	0.0396397
ENSMUSG00000089714	GM16092	-1.266	0.0226325
ENSMUSG00000089727	KLRA8	-1.739	0.0154478
ENSMUSG00000089746	GM3513	1.801	0.0229954
ENSMUSG00000089766	GM16538	2.732	6.28062e-12
ENSMUSG00000089789	RDH1	-1.533	0.0200849
ENSMUSG00000089838	GM2962	-1.203	0.0232763
ENSMUSG00000090005	GM16540	-1.388	0.0167753
ENSMUSG00000090173	FBXW10	-1.08	0.00191841
ENSMUSG00000090202	4930503B20RIK	1.548	0.0151519
ENSMUSG00000090215	TRIM34B	-1.284	0.00302118
ENSMUSG00000090246	GM17017	-1.574	0.000593854
ENSMUSG00000090622	A930033H14RIK	2.907	1.2047e-14
ENSMUSG00000090812	SAMD15	-1.092	0.0204568
ENSMUSG00000091019	GM7502	-1.961	0.0417597
ENSMUSG00000091405	HIST2H4	2.579	7.96888e-25
ENSMUSG00000091577	GM6211	7.547	3.1458e-39
ENSMUSG00000091906	1700099I09RIK	-1.19	0.00469657
ENSMUSG00000092074	DYNLT1A	1.223	0.00074021
ENSMUSG00000092222	NA	-1.528	0.00188135
ENSMUSG00000092250	GM20467	6.952	2.08764e-20
ENSMUSG00000092415	GM20513	-1.946	0.00204276
ENSMUSG00000092418	GM20406	-2.734	0.0227153
ENSMUSG00000092761	MIR5120	-1.375	0.00774057
ENSMUSG00000093153	GM25033	-6.106	0.00687172
ENSMUSG00000093424	6330562C20RIK	1.304	0.000273357
ENSMUSG00000093656	GM20628	2.522	9.471e-23
ENSMUSG00000093859	GM7882	-2.841	0.00735578
ENSMUSG00000093861	IGKV1-110	-1.172	0.0110936
ENSMUSG00000093894	IGHV1-53	-1.563	0.00115054
ENSMUSG00000093896	IGHV1-76	-1.529	0.000313445
ENSMUSG00000094006	IGKV4-59	-1.202	0.00905595
ENSMUSG00000094075	IGHV1-80	-1.212	0.00303382
ENSMUSG00000094088	IGHV1-64	-1.496	0.00041135
ENSMUSG00000094094	IGKV5-45	-1.461	0.0238397
ENSMUSG00000094102	IGHV9-2	-1.837	0.00145818
ENSMUSG00000094117	IGKV3-12	-1.181	0.0230955
ENSMUSG00000094124	IGHV1-74	-1.197	0.00898178
ENSMUSG00000094134	IGHV5-15	-1.699	0.001633
ENSMUSG00000094194	IGHV5-16	1.047	0.035372
ENSMUSG00000094198	IGHV1-50	-1.442	0.00271943
ENSMUSG00000094338	HIST1H2BL	4.302	1.01807e-62
ENSMUSG00000094345	IGKV14-126	1.01	0.0311984
ENSMUSG00000094356	IGKV8-28	-1.005	0.0398707
ENSMUSG00000094420	IGKV10-96	-1.14	0.0166877
ENSMUSG00000094433	IGKV5-43	-1.012	0.0284325
ENSMUSG00000094491	IGKV1-133	-1.808	0.00313468
ENSMUSG00000094502	IGHV1-69	-1.512	0.00472671
ENSMUSG00000094509	IGHV14-1	-1.525	0.0117784
ENSMUSG00000094546	IGHV1-26	-1.294	0.00331011
ENSMUSG00000094561	IGHV1-22	-1.238	0.0102892
ENSMUSG00000094652	IGHV1-42	-1.534	0.00158919
ENSMUSG00000094689	IGHV1-81	-1.566	0.000279666
ENSMUSG00000094840	MUC3A	-1.667	5.73026e-05
ENSMUSG00000094872	IGKV9-120	-1.171	0.0229954
ENSMUSG00000094930	IGKV6-25	-1.179	0.0254236
ENSMUSG00000094993	IGKV4-51	-1.566	0.00619722
ENSMUSG00000095007	IGKV12-41	-1.388	0.00327493
ENSMUSG00000095105	EDARADD	-1.648	0.000120399
ENSMUSG00000095127	IGHV1-82	-1.286	0.00148994
ENSMUSG00000095130	IGHV1-39	-1.178	0.0116099
ENSMUSG00000095197	IGHV1-59	-1.664	0.00195535
ENSMUSG00000095200	IGHV1-7	-1.221	0.00560326
ENSMUSG00000095285	IGHV5-9	-1.044	0.0239155
ENSMUSG00000095351	IGKV3-2	-1.651	0.00125112
ENSMUSG00000095429	IGHV5-12	-1.223	0.00692262
ENSMUSG00000095442	IGHV1-4	-1.373	0.0140904
ENSMUSG00000095497	IGKV1-122	-1.596	0.00595763
ENSMUSG00000095519	IGHV1-66	-1.92	2.54425e-05
ENSMUSG00000095565	IGHV2-9-1	-1.254	0.00996623
ENSMUSG00000095583	IGHV14-2	-1.482	0.000485202
ENSMUSG00000095633	IGKV4-58	-1.248	0.0196884
ENSMUSG00000095642	IGHV14-3	-1.178	0.0180759
ENSMUSG00000095682	IGKV3-1	-1.358	0.0232505
ENSMUSG00000095700	IGHV10-3	-1.49	0.000555194
ENSMUSG00000095737	IGKV11-125	-1.425	0.0355665
ENSMUSG00000095753	IGKV4-53	-1.254	0.00367958
ENSMUSG00000095789	NUPR1L	-1.435	0.000320049
ENSMUSG00000095863	IGHV1-67	-1.392	0.00531547
ENSMUSG00000095889	IGHV1-58	-2.53	2.89042e-08
ENSMUSG00000096010	HIST4H4	2.193	8.72418e-25
ENSMUSG00000096020	IGHV1-75	-1.163	0.00412626
ENSMUSG00000096108	IGHV11-2	1.698	5.36869e-05
ENSMUSG00000096150	IGHV1-85	-1.613	0.000988558
ENSMUSG00000096336	IGKV1-135	-1.19	0.0115385
ENSMUSG00000096351	SAMD11	2.37	0.0066263
ENSMUSG00000096410	IGHV1-19	-1.867	8.72067e-05
ENSMUSG00000096461	IGKV14-130	-1.947	0.00092351
ENSMUSG00000096490	IGKV10-94	-1.31	0.00848172
ENSMUSG00000096498	IGHV2-5	-1.413	0.00137109
ENSMUSG00000096499	IGHV1-5	-1.685	0.000861733
ENSMUSG00000096515	IGKV14-100	-1.011	0.0482814
ENSMUSG00000096670	IGHV2-6	-1.623	0.000469405
ENSMUSG00000096672	IGHV1-63	-1.49	0.00296753
ENSMUSG00000096805	IGHV9-1	-1.084	0.0311984
ENSMUSG00000096807	NA	5.654	3.88775e-111
ENSMUSG00000096833	IGKV4-55	-1.097	0.0181533
ENSMUSG00000096844	IGKV6-14	-1.18	0.018579
ENSMUSG00000096883	SHISA8	-1.957	0.00133289
ENSMUSG00000096965	3300005D01RIK	-1.076	0.000517023
ENSMUSG00000096982	REDRUM	3.608	4.01904e-05
ENSMUSG00000097039	PVT1	1.491	2.00034e-19
ENSMUSG00000097069	GM16998	-1.419	0.00683401
ENSMUSG00000097075	CDIPTOS	-1.053	0.0387985
ENSMUSG00000097076	PLATR7	-1.452	0.0139117
ENSMUSG00000097080	1700086O06RIK	2.588	2.04003e-25
ENSMUSG00000097081	GM10425	-2.473	0.00584009
ENSMUSG00000097109	GM26580	-1.762	0.00548799
ENSMUSG00000097120	GM26887	-2.424	0.000583399
ENSMUSG00000097123	GM6297	-1.427	0.0452115
ENSMUSG00000097131	D230017M19RIK	-1.464	4.24337e-05
ENSMUSG00000097142	GM26778	-1.535	0.000366746
ENSMUSG00000097145	9230114K14RIK	1.098	0.000176323
ENSMUSG00000097150	GM26513	1.987	2.44908e-13
ENSMUSG00000097154	GM26510	-1.264	0.0320297
ENSMUSG00000097184	4632428C04RIK	-1.209	0.00163815
ENSMUSG00000097233	GM17552	-1.483	0.00303195
ENSMUSG00000097254	C430042M11RIK	1.204	0.000617061
ENSMUSG00000097316	GM10516	2.169	1.87509e-11
ENSMUSG00000097328	TNFSF12	-1.318	0.0236757
ENSMUSG00000097331	F420014N23RIK	2.546	6.60493e-07
ENSMUSG00000097402	GM17399	1.417	0.000226534
ENSMUSG00000097416	GM26670	-1.606	0.00892153
ENSMUSG00000097440	GM6277	3.902	8.77227e-09
ENSMUSG00000097569	GM26640	-1.469	0.0274068
ENSMUSG00000097614	GM26508	-1.105	0.00799972
ENSMUSG00000097619	4833422M21RIK	-1.671	0.000888547
ENSMUSG00000097674	GM26610	-1.142	0.0334067
ENSMUSG00000097707	GM26742	-1.764	0.0055469
ENSMUSG00000097709	2810429I04RIK	-1.895	0.00301598
ENSMUSG00000097860	GM26857	-1.11	0.00178345
ENSMUSG00000097882	0610038B21RIK	1.235	0.000109439
ENSMUSG00000097902	GM26531	-1.738	0.00516644
ENSMUSG00000097922	NA	6.726	1.09706e-22
ENSMUSG00000097993	PTPRV	1.08	8.97263e-05
ENSMUSG00000098197	BC051537	1.732	4.24862e-11
ENSMUSG00000098318	LOCKD	1.966	0.00480056
ENSMUSG00000098557	KCTD12	-1.339	0.000423161
ENSMUSG00000098719	MIR7212	-1.11	0.0452184
ENSMUSG00000099098	1110035H17RIK	-1.166	0.0170474
ENSMUSG00000099105	MIR7007	3.437	2.37581e-05
ENSMUSG00000099310	GM19427	-1.103	0.0150713
ENSMUSG00000099370	PLATR10	-1.625	0.013319
ENSMUSG00000099375	GM28187	1.004	0.000870153
ENSMUSG00000099474	1700097N02RIK	3.245	1.0202e-26
ENSMUSG00000099517	HIST1H3G	5.709	5.89432e-46
ENSMUSG00000099583	HIST1H3D	2.608	1.82541e-13
ENSMUSG00000099600	GM29126	-1.849	0.0205934
ENSMUSG00000099689	ZFP383	-1.015	0.00100567
ENSMUSG00000099954	GM28112	2.674	2.66166e-12
ENSMUSG00000100210	HIST1H3F	3.311	2.93248e-47
ENSMUSG00000100287	GM28068	-1.513	0.0389283
ENSMUSG00000100320	GM29417	-1.969	0.00109651
ENSMUSG00000100354	GM29113	3.739	1.01306e-16
ENSMUSG00000100552	GM29019	-2.632	0.0493091
ENSMUSG00000100615	GM5511	-1.032	0.0222543
ENSMUSG00000100625	1700016G22RIK	-2.868	0.0254786
ENSMUSG00000100629	GM28192	-1.826	0.0449298
ENSMUSG00000100658	F730311O21RIK	-1.084	0.036231
ENSMUSG00000100815	GM29112	2.76	3.90527e-10
ENSMUSG00000100880	GM6610	-1.97	0.0346678
ENSMUSG00000101029	GM29439	-1.585	0.00118442
ENSMUSG00000101188	EIF4A-PS4	1.103	0.000154634
ENSMUSG00000101355	HIST1H3H	3.188	6.1925e-29
ENSMUSG00000101581	C430002N11RIK	2.477	1.1466e-10
ENSMUSG00000101823	GM29438	2.832	3.61453e-21
ENSMUSG00000101880	GM29282	-1.322	0.0194951
ENSMUSG00000101964	GM28693	-1.594	0.000225787
ENSMUSG00000101972	HIST1H3I	2.882	2.17437e-25
ENSMUSG00000102145	GM38056	1.314	0.00211466
ENSMUSG00000102148	GM38059	1.374	0.0111317
ENSMUSG00000102184	GM37192	-1.793	1.1856e-05
ENSMUSG00000102202	GM33280	5.159	2.16942e-62
ENSMUSG00000102235	GM37886	-1.158	0.0129084
ENSMUSG00000102293	GM37541	-1.119	0.0424673
ENSMUSG00000102301	IGHV8-2	-1.117	0.0368502
ENSMUSG00000102376	GM37975	-1.036	0.00633524
ENSMUSG00000102380	GM38140	-1.728	0.0149996
ENSMUSG00000102405	GM37863	-2.149	0.039411
ENSMUSG00000102509	GM37368	1.901	7.84509e-06
ENSMUSG00000102524	IGHV1-2	-1.466	0.00926897
ENSMUSG00000102563	GM37695	-1.745	0.000682073
ENSMUSG00000102594	GM38381	1.155	0.0298568
ENSMUSG00000102625	GM37672	-1.174	0.0162352
ENSMUSG00000102725	GM37939	-1.994	0.000422529
ENSMUSG00000102727	NA	-2.035	0.000122063
ENSMUSG00000102831	GM37382	1.179	0.0401882
ENSMUSG00000102850	GM37082	-1.016	0.00433513
ENSMUSG00000102888	IGHV1-11	-1.283	0.0256802
ENSMUSG00000102912	GM20731	-1.429	0.0135016
ENSMUSG00000102960	GM37943	-1.525	0.000462726
ENSMUSG00000103030	E330011M16RIK	-1.259	0.0342552
ENSMUSG00000103130	F830212C03RIK	6.484	3.66177e-21
ENSMUSG00000103151	GM38292	-1.02	0.0235335
ENSMUSG00000103174	GM37168	-2.563	0.0106359
ENSMUSG00000103198	GM9136	-3.931	0.0276835
ENSMUSG00000103254	IGHV1-15	-1.634	0.000541135
ENSMUSG00000103303	GM37802	-1.39	0.0072084
ENSMUSG00000103445	GM36948	1.789	9.48154e-11
ENSMUSG00000103560	GM38070	2.762	6.69242e-05
ENSMUSG00000103636	GM38331	3.211	5.78865e-08
ENSMUSG00000103672	GM37621	-1.09	0.0137788
ENSMUSG00000103788	GM37527	6.126	1.66928e-22
ENSMUSG00000103857	GM37249	1.319	0.00118661
ENSMUSG00000103995	5730488B01RIK	-1.949	0.000280212
ENSMUSG00000103996	4833421G17RIK	-1.058	0.0171987
ENSMUSG00000104136	GM36955	-1.687	0.000851174
ENSMUSG00000104138	GM36949	-1.366	0.0180051
ENSMUSG00000104213	IGHD	-1.642	0.000536976
ENSMUSG00000104316	GM37909	-1.124	0.00566437
ENSMUSG00000104340	GM10522	-1.132	0.0203552
ENSMUSG00000104348	GM37691	-1.16	0.0106807
ENSMUSG00000104351	GM37125	-1.743	0.019614
ENSMUSG00000104452	IGHV8-8	-1.268	0.00226353
ENSMUSG00000104484	GM33142	-1.446	0.0455095
ENSMUSG00000104517	GM18407	-1.9	0.0219223
ENSMUSG00000104524	GM37333	1.056	0.0426735
ENSMUSG00000104641	GM43290	-1.152	0.00401057
ENSMUSG00000104735	C130075A20RIK	6.053	3.83798e-13
ENSMUSG00000104765	GM43058	-2.538	0.0211989
ENSMUSG00000104906	GM43005	-1.159	0.0432942
ENSMUSG00000104927	GM43388	-1.359	0.00248215
ENSMUSG00000104940	GM42908	-1.184	0.0197368
ENSMUSG00000104955	1700016F12RIK	7.315	6.50595e-22
ENSMUSG00000104994	GM42989	3.022	5.3128e-08
ENSMUSG00000105072	GM44335	3.434	2.95428e-11
ENSMUSG00000105095	8430422M14RIK	-1.041	0.0181452
ENSMUSG00000105107	GM43412	-1.054	0.012837
ENSMUSG00000105128	GM42870	-2.177	9.56632e-07
ENSMUSG00000105160	A530030E21RIK	-1.326	0.00821597
ENSMUSG00000105244	GM5281	-1.331	0.00929846
ENSMUSG00000105345	BC030343	1.19	0.00819739
ENSMUSG00000105437	GM42450	3.387	1.69841e-06
ENSMUSG00000105439	A230098N10RIK	4.294	2.28874e-09
ENSMUSG00000105462	IGKV4-77	-1.315	0.0240481
ENSMUSG00000105482	GM42596	-1.047	0.0468637
ENSMUSG00000105547	IGLC3	-1.073	0.00289572
ENSMUSG00000105553	GM42514	-1.029	0.0102892
ENSMUSG00000105580	GM44454	3.588	7.13841e-19
ENSMUSG00000105624	GM43187	3.265	3.70644e-12
ENSMUSG00000105646	GM30211	-1.207	0.00228823
ENSMUSG00000105681	GM43428	2.88	4.96962e-12
ENSMUSG00000105694	GM43237	-1.085	0.0230439
ENSMUSG00000105703	GM43305	-1.444	0.0358238
ENSMUSG00000105707	GM43753	-1.056	0.0189986
ENSMUSG00000105714	GM43380	-1.541	0.00531547
ENSMUSG00000105761	GM43787	1.664	0.00317056
ENSMUSG00000105813	GM42928	-1.861	0.00054296
ENSMUSG00000105827	HIST2H2BB	3.762	5.45755e-77
ENSMUSG00000105926	GM43386	3.601	5.06732e-17
ENSMUSG00000105935	GM43628	-1.117	0.0261003
ENSMUSG00000105985	GM42993	2.672	4.86399e-10
ENSMUSG00000106019	GM43672	-1.937	0.0250848
ENSMUSG00000106022	GM42929	-1.4	0.0143434
ENSMUSG00000106031	GM8848	-1.588	0.039372
ENSMUSG00000106039	IGLC4	-1.653	0.0112619
ENSMUSG00000106049	GM43019	3.36	2.16664e-14
ENSMUSG00000106175	GM44313	1.47	0.00361798
ENSMUSG00000106178	GM42987	-1.589	0.0108021
ENSMUSG00000106197	GM42717	-1.061	0.0187108
ENSMUSG00000106208	GM4734	-1.019	0.0369879
ENSMUSG00000106211	GM42842	3.483	0.000483398
ENSMUSG00000106269	4930580E04RIK	-2.446	0.0219901
ENSMUSG00000106290	GM43429	2.579	1.1466e-10
ENSMUSG00000106320	GM42992	2.655	6.69066e-10
ENSMUSG00000106321	GM43674	-3.238	0.0423086
ENSMUSG00000106325	IGHV8-10	-3.594	0.000574692
ENSMUSG00000106384	GM43188	3.595	1.18838e-15
ENSMUSG00000106386	GM42991	2.636	7.73536e-09
ENSMUSG00000106405	IGLJ3P	-1.193	0.0330497
ENSMUSG00000106431	GM44492	1.814	1.2453e-05
ENSMUSG00000106436	MIR7015	-1.227	0.0215849
ENSMUSG00000106438	GM32051	3.339	2.38751e-05
ENSMUSG00000106441	GM42921	2.293	0.00322079
ENSMUSG00000106515	GM30382	2.532	3.10295e-06
ENSMUSG00000106518	GM42759	-1.557	0.0251231
ENSMUSG00000106567	2010309G21RIK	-1.854	5.55756e-06
ENSMUSG00000106570	C230071H17RIK	2.908	2.37434e-09
ENSMUSG00000106588	GM17590	8.016	1.00578e-66
ENSMUSG00000106636	GM43813	-1.037	0.00718205
ENSMUSG00000106664	GM17936	3.109	6.92338e-11
ENSMUSG00000106739	GM43499	-1.054	0.0339526
ENSMUSG00000106744	NA	1.048	6.77318e-09
ENSMUSG00000106764	GM42529	-1.052	0.0322923
ENSMUSG00000106822	GM43533	1.263	0.000512852
ENSMUSG00000106847	PEG13	-1.106	0.0433737
ENSMUSG00000106856	GM43761	-1.299	0.00344041
ENSMUSG00000106858	GM43844	1.853	8.59681e-09
ENSMUSG00000106927	GM43598	-1.43	0.00630691
ENSMUSG00000107017	GM43196	-1.399	0.000173706
ENSMUSG00000107195	4930589O11RIK	-1.349	0.00308106
ENSMUSG00000107216	2210412B16RIK	-1.369	0.019945
ENSMUSG00000107262	GM18753	-1.816	0.001479
ENSMUSG00000107370	GM43588	1.218	0.0077045

## Sheet: Table S3 c3vsc1s_DEG_table
Table S3 c3vsc1s_DEG_table
gene	genesym	c3_logFC	c3_qval
ENSMUSG00000000001	GNAI3	1.019	9.63393e-18
ENSMUSG00000000028	CDC45	3.093	3.2817e-125
ENSMUSG00000000049	APOH	-3.84	0.000123275
ENSMUSG00000000056	NARF	1.088	6.26704e-07
ENSMUSG00000000058	CAV2	-1.055	0.00794798
ENSMUSG00000000088	COX5A	-1.277	0.0304031
ENSMUSG00000000120	NGFR	-2.455	2.10301e-17
ENSMUSG00000000142	AXIN2	2.219	8.90924e-44
ENSMUSG00000000148	BRAT1	1.074	1.74674e-12
ENSMUSG00000000168	DLAT	1.006	5.08993e-21
ENSMUSG00000000171	SDHD	1.474	2.92673e-47
ENSMUSG00000000184	CCND2	2.313	2.23603e-52
ENSMUSG00000000204	SLFN4	-2.69	5.43841e-06
ENSMUSG00000000244	TSPAN32	-1.38	1.29938e-19
ENSMUSG00000000253	GMPR	2	0.000109717
ENSMUSG00000000266	MID2	-2.826	0.000467558
ENSMUSG00000000278	SCPEP1	-1.181	1.19377e-10
ENSMUSG00000000290	ITGB2	-1.644	8.87687e-06
ENSMUSG00000000301	PEMT	2.176	4.28876e-37
ENSMUSG00000000303	CDH1	-1.822	0.000113425
ENSMUSG00000000308	CKMT1	-3.995	0.000280406
ENSMUSG00000000320	ALOX12	-2.941	0.000463184
ENSMUSG00000000325	ARVCF	1.567	1.21987e-23
ENSMUSG00000000326	COMT	3.34	2.54502e-149
ENSMUSG00000000346	DAZAP2	-1.095	0.0197184
ENSMUSG00000000359	REM1	-1.483	0.000450733
ENSMUSG00000000365	RNF17	-2.178	0.00065918
ENSMUSG00000000384	TBRG4	1.166	1.40626e-19
ENSMUSG00000000385	TMPRSS2	-3.5	9.91773e-05
ENSMUSG00000000386	MX1	-1.654	2.44431e-08
ENSMUSG00000000399	NDUFA9	1.572	1.54495e-41
ENSMUSG00000000402	EGFL6	-3.055	6.96257e-08
ENSMUSG00000000416	CTTNBP2	4.865	5.10311e-05
ENSMUSG00000000532	ACVR1B	1.684	1.07694e-42
ENSMUSG00000000552	ZFP385A	1.635	3.59937e-31
ENSMUSG00000000555	ITGA5	2.232	4.41438e-18
ENSMUSG00000000562	ADORA3	5.412	7.55886e-87
ENSMUSG00000000563	ATP5F1	1.201	8.82312e-20
ENSMUSG00000000567	SOX9	-5.179	0.000462963
ENSMUSG00000000579	DYNLT1C	-1.493	9.04466e-06
ENSMUSG00000000581	C1D	1.443	3.10739e-35
ENSMUSG00000000682	CD52	-1.283	1.26201e-07
ENSMUSG00000000693	LOXL3	-1.651	0.00638651
ENSMUSG00000000731	AIRE	-1.96	1.70502e-07
ENSMUSG00000000732	ICOSL	-2.559	1.92193e-26
ENSMUSG00000000751	RPA1	1.668	1.74377e-45
ENSMUSG00000000869	IL4	4.127	3.7867e-26
ENSMUSG00000000881	DLG3	-1.446	4.2575e-19
ENSMUSG00000000901	MMP11	-2.765	3.88419e-17
ENSMUSG00000000903	VPREB3	-2.606	4.05837e-17
ENSMUSG00000000915	HIP1R	-2.12	5.52635e-26
ENSMUSG00000000938	HOXA10	8.569	3.48075e-18
ENSMUSG00000000957	MMP14	3.836	9.14383e-20
ENSMUSG00000000982	CCL3	-3.132	0.00292004
ENSMUSG00000000983	WFDC18	-3.121	8.07975e-06
ENSMUSG00000001014	ICAM4	5.564	1.11521e-131
ENSMUSG00000001021	S100A3	-2.404	0.00400507
ENSMUSG00000001025	S100A6	-1.318	0.00111858
ENSMUSG00000001027	SCN4A	-1.449	2.79631e-09
ENSMUSG00000001034	MAPK7	1.114	3.41507e-18
ENSMUSG00000001039	B9D1	3.996	2.12283e-38
ENSMUSG00000001053	N4BP3	-2.108	1.57091e-23
ENSMUSG00000001056	NHP2	1.843	4.78538e-58
ENSMUSG00000001082	MFSD10	1.713	3.30015e-30
ENSMUSG00000001095	SLC13A2	-3.49	3.55377e-05
ENSMUSG00000001098	KCTD10	1.166	1.04833e-15
ENSMUSG00000001100	POLDIP2	1.361	2.35758e-30
ENSMUSG00000001120	PCBP3	1.148	1.04038e-14
ENSMUSG00000001123	LGALS9	2.22	2.29534e-67
ENSMUSG00000001156	MXD1	-1.644	0.000301012
ENSMUSG00000001173	OCRL	1.39	1.36941e-07
ENSMUSG00000001228	UHRF1	4.127	4.94262e-105
ENSMUSG00000001247	LSR	-1.838	2.89407e-07
ENSMUSG00000001248	GRAMD1A	-1.219	1.0298e-09
ENSMUSG00000001249	HPN	5.262	2.61973e-46
ENSMUSG00000001288	RARG	-1.221	1.40467e-05
ENSMUSG00000001300	EFNB2	-1.475	9.60659e-05
ENSMUSG00000001305	RRP15	1.055	2.46986e-20
ENSMUSG00000001313	RND2	2.86	6.18145e-25
ENSMUSG00000001333	SYNC	5.013	1.07608e-16
ENSMUSG00000001349	CNN1	-2.268	0.0191308
ENSMUSG00000001380	HARS	2.333	3.64618e-151
ENSMUSG00000001416	CCT3	1.702	4.6958e-30
ENSMUSG00000001424	SND1	1.145	1.42558e-38
ENSMUSG00000001435	COL18A1	2.717	8.30846e-07
ENSMUSG00000001436	SLC19A1	1.753	9.07102e-45
ENSMUSG00000001440	KPNB1	1.003	3.10657e-17
ENSMUSG00000001467	CYP51	1.5	1.09038e-31
ENSMUSG00000001482	DEF8	2.385	2.41039e-70
ENSMUSG00000001506	COL1A1	-4.15	0.000298448
ENSMUSG00000001507	ITGA3	-1.892	2.99144e-11
ENSMUSG00000001517	FOXM1	2.877	2.64219e-111
ENSMUSG00000001525	TUBB5	2.213	1.86172e-67
ENSMUSG00000001552	JUP	-1.464	0.000774065
ENSMUSG00000001604	TCEA3	-2.428	5.64801e-12
ENSMUSG00000001627	IFRD1	-1.202	0.0096932
ENSMUSG00000001663	GSTT1	2.054	0.000486145
ENSMUSG00000001672	MARVELD3	-3.18	0.000449788
ENSMUSG00000001674	DDX18	1.022	1.04572e-11
ENSMUSG00000001700	GRAMD3	-1.32	2.1279e-13
ENSMUSG00000001707	EEF1E1	2.016	1.93751e-52
ENSMUSG00000001729	AKT1	1.043	1.72035e-12
ENSMUSG00000001741	IL16	-1.73	6.77084e-11
ENSMUSG00000001761	SMO	6.705	1.89218e-144
ENSMUSG00000001785	PWP1	1.261	7.13638e-22
ENSMUSG00000001827	FOLR1	-2.833	0.000434901
ENSMUSG00000001847	RAC1	-1.971	0.00154069
ENSMUSG00000001865	CPA3	8.223	1.60372e-75
ENSMUSG00000001870	LTBP1	-3.271	6.82095e-05
ENSMUSG00000001901	KCNH6	-1.038	0.0157342
ENSMUSG00000001910	NACC1	1.185	6.62839e-26
ENSMUSG00000001930	VWF	-2.428	0.00170959
ENSMUSG00000001942	SIAE	-1.043	0.00369493
ENSMUSG00000001943	VSIG2	-3.346	0.000130884
ENSMUSG00000001946	ESAM	-3.194	9.76022e-05
ENSMUSG00000001948	SPA17	-2.585	0.00107433
ENSMUSG00000001983	TACO1	1.082	2.09579e-18
ENSMUSG00000001986	GRIA3	1.473	2.85583e-12
ENSMUSG00000001995	SIPA1L2	-1.115	2.53937e-08
ENSMUSG00000001999	BLVRA	2.087	8.09693e-72
ENSMUSG00000002007	SRPK3	-3.185	1.22031e-24
ENSMUSG00000002010	IDH3G	1.017	6.71611e-26
ENSMUSG00000002012	PNCK	-2.955	0.000409071
ENSMUSG00000002014	SSR4	1.079	1.36396e-11
ENSMUSG00000002020	LTBP2	-5.19	1.80791e-07
ENSMUSG00000002055	SPAG5	1.358	0.0199565
ENSMUSG00000002057	FOXN1	-2.582	0.0117298
ENSMUSG00000002076	HSF2BP	-4.538	6.8272e-06
ENSMUSG00000002083	BBC3	2.333	1.13466e-87
ENSMUSG00000002100	MYBPC3	-1.753	0.00129168
ENSMUSG00000002190	CLGN	6.879	1.1867e-36
ENSMUSG00000002204	NAPSA	-1.214	6.46904e-08
ENSMUSG00000002233	RHOC	-1.547	0.00666826
ENSMUSG00000002249	TEAD3	-2.409	0.00154359
ENSMUSG00000002274	METRN	1.526	5.0901e-35
ENSMUSG00000002289	ANGPTL4	2.622	1.15848e-19
ENSMUSG00000002297	DBF4	1.648	2.32115e-50
ENSMUSG00000002319	IPO4	1.359	6.02509e-24
ENSMUSG00000002324	REC8	4.103	1.2832e-77
ENSMUSG00000002343	ARMC6	1.684	4.51516e-52
ENSMUSG00000002365	SNX9	-1.378	4.59276e-21
ENSMUSG00000002372	RANBP3	1.107	3.73626e-32
ENSMUSG00000002379	NDUFA11	1.035	8.31498e-10
ENSMUSG00000002477	SNRPD1	2.003	6.87984e-57
ENSMUSG00000002565	SCIN	1.845	0.00128479
ENSMUSG00000002578	IKZF4	1.187	4.76438e-07
ENSMUSG00000002658	GTF2F1	1.512	3.08884e-32
ENSMUSG00000002660	CLPP	1.209	2.47125e-20
ENSMUSG00000002668	DENND1C	-1.411	6.53693e-16
ENSMUSG00000002688	PRKD1	9.312	9.21558e-47
ENSMUSG00000002699	LCP2	1.58	6.54021e-25
ENSMUSG00000002767	MRPL2	1.381	6.99803e-33
ENSMUSG00000002769	GNMT	-1.467	2.95733e-05
ENSMUSG00000002771	GRIN2D	5.274	1.11099e-125
ENSMUSG00000002781	TMEM143	1.052	9.35424e-16
ENSMUSG00000002797	GGCT	-1.398	4.38901e-14
ENSMUSG00000002799	JAG2	-1.728	5.15575e-08
ENSMUSG00000002808	EPDR1	7.296	1.13329e-57
ENSMUSG00000002831	PLIN4	-3.008	2.60614e-05
ENSMUSG00000002835	CHAF1A	3.751	5.73551e-112
ENSMUSG00000002847	PLA1A	-2.344	0.000650026
ENSMUSG00000002870	MCM2	2.904	1.84617e-163
ENSMUSG00000002944	CD36	-2.516	0.00150421
ENSMUSG00000002984	TOMM40	1.162	1.00114e-21
ENSMUSG00000002992	APOC2	-1.401	8.38928e-05
ENSMUSG00000002997	PRKAR2B	-2.105	0.00408185
ENSMUSG00000003032	KLF4	-1.127	1.53268e-08
ENSMUSG00000003051	ELF3	-3.359	5.48015e-05
ENSMUSG00000003070	EFNA2	-1.404	0.0100881
ENSMUSG00000003072	ATP5D	1.18	1.03967e-33
ENSMUSG00000003134	TBC1D8	1.663	1.13972e-36
ENSMUSG00000003178	NA	1.125	0.000789166
ENSMUSG00000003199	MPND	-1.142	1.84546e-15
ENSMUSG00000003271	SULT2B1	-1.649	0.00228201
ENSMUSG00000003283	HCK	-1.781	1.65906e-12
ENSMUSG00000003309	AP1M2	-1.69	2.7118e-09
ENSMUSG00000003355	FKBP11	-1.606	9.81285e-11
ENSMUSG00000003379	CD79A	-2.216	2.90236e-13
ENSMUSG00000003402	PRKCSH	1.024	1.72021e-19
ENSMUSG00000003418	ST8SIA6	-1.331	2.61239e-07
ENSMUSG00000003423	PIH1D1	1.042	1.25219e-23
ENSMUSG00000003438	TIMM50	1.659	8.9286e-37
ENSMUSG00000003452	BICD1	-3.104	1.29574e-05
ENSMUSG00000003469	PHYHIP	-2.335	0.00980626
ENSMUSG00000003484	CYP4F18	-2.105	2.81312e-19
ENSMUSG00000003500	IMPDH1	2.087	1.35113e-57
ENSMUSG00000003528	SLC25A1	2.246	1.14427e-78
ENSMUSG00000003541	IER3	-1.175	0.0233696
ENSMUSG00000003559	AS3MT	-1.295	0.000265638
ENSMUSG00000003573	HOMER3	-1.706	0.00573135
ENSMUSG00000003585	SEC14L2	7.177	6.29572e-198
ENSMUSG00000003746	MAN1A	-1.911	2.45206e-21
ENSMUSG00000003779	KIF20A	4.121	1.29252e-185
ENSMUSG00000003808	FARSA	1.163	1.47882e-43
ENSMUSG00000003810	MAST2	-1.425	0.0264419
ENSMUSG00000003812	DNASE2A	1.71	1.04753e-46
ENSMUSG00000003824	SYCE2	4.658	5.54003e-177
ENSMUSG00000003848	NOB1	1.81	2.68534e-34
ENSMUSG00000003849	NQO1	2.054	0.000127365
ENSMUSG00000003868	RUVBL2	1.439	1.44932e-18
ENSMUSG00000003873	BAX	1.18	1.81742e-29
ENSMUSG00000003948	MMD	-3.702	2.32588e-05
ENSMUSG00000003949	HLF	5.763	1.46592e-76
ENSMUSG00000003955	FAM162A	1.766	1.26441e-42
ENSMUSG00000004018	FANCL	1.117	2.57728e-05
ENSMUSG00000004043	STAT5A	1.592	2.18538e-56
ENSMUSG00000004044	CAVIN1	-2.506	0.00228646
ENSMUSG00000004071	CDIP1	-1.33	6.04107e-12
ENSMUSG00000004085	MAP3K20	1.68	7.56069e-19
ENSMUSG00000004098	COL5A3	-2.766	5.67239e-08
ENSMUSG00000004099	DNMT1	1.75	3.44214e-28
ENSMUSG00000004100	PPAN	1.414	7.38098e-23
ENSMUSG00000004105	ANGPTL2	1.619	1.9857e-16
ENSMUSG00000004110	CACNA1E	-1.985	4.58894e-15
ENSMUSG00000004264	PHB2	1.392	1.49183e-21
ENSMUSG00000004270	LPCAT3	2.973	1.46057e-99
ENSMUSG00000004383	LARGE1	-2.371	3.66177e-07
ENSMUSG00000004446	BID	-1.358	1.868e-05
ENSMUSG00000004451	RALB	-1.158	5.8734e-06
ENSMUSG00000004462	TBCCD1	1.58	9.00835e-57
ENSMUSG00000004473	CLEC11A	2.96	2.80272e-44
ENSMUSG00000004500	ZFP324	1.253	3.8085e-16
ENSMUSG00000004508	GAB2	2.345	1.70744e-25
ENSMUSG00000004552	CTSE	-1.473	0.0423512
ENSMUSG00000004558	NDRG2	3.678	3.13986e-25
ENSMUSG00000004562	ARHGEF40	4.923	2.66277e-93
ENSMUSG00000004565	PNPLA6	1.391	4.94962e-31
ENSMUSG00000004568	ARHGEF18	-1.514	1.48817e-12
ENSMUSG00000004609	CD33	-2.323	1.43003e-05
ENSMUSG00000004610	ETFB	1.94	8.95964e-22
ENSMUSG00000004631	SGCE	-2.761	0.000788054
ENSMUSG00000004633	CHN2	2.455	1.80668e-32
ENSMUSG00000004642	SLBP	1.156	3.03583e-19
ENSMUSG00000004655	AQP1	-1.669	0.0274732
ENSMUSG00000004661	ARID3B	-1.382	2.63996e-20
ENSMUSG00000004665	CNN2	-1.928	0.000811829
ENSMUSG00000004698	HDAC9	-2.942	7.77612e-38
ENSMUSG00000004707	LY9	-1.403	1.55881e-09
ENSMUSG00000004709	CD244A	-1.719	7.61451e-07
ENSMUSG00000004748	MTFP1	2.35	1.58272e-57
ENSMUSG00000004788	EIF2B2	1.247	1.84112e-24
ENSMUSG00000004789	DLST	1.377	3.3112e-64
ENSMUSG00000004814	CCL24	5.961	4.7116e-18
ENSMUSG00000004837	GRAP	-1.649	1.60091e-15
ENSMUSG00000004849	AP1S1	1.095	9.92509e-05
ENSMUSG00000004864	MAPK13	-2.244	6.15691e-05
ENSMUSG00000004897	HDGF	2.651	6.94639e-70
ENSMUSG00000004902	SLC25A18	-1.943	0.000269473
ENSMUSG00000004929	THOP1	2.132	5.13014e-67
ENSMUSG00000004952	RASA4	-1.39	3.00209e-11
ENSMUSG00000004996	MRI1	1.005	1.2421e-24
ENSMUSG00000005043	SGSH	-1.448	3.62918e-11
ENSMUSG00000005057	SH2B2	-1.039	0.00969221
ENSMUSG00000005087	CD44	-1.562	0.00151367
ENSMUSG00000005125	NDRG1	-2.855	1.93563e-05
ENSMUSG00000005148	KLF5	2.053	4.05087e-05
ENSMUSG00000005225	PLEKHA8	-1.173	0.000338967
ENSMUSG00000005233	SPC25	1.573	3.13248e-05
ENSMUSG00000005237	DNAH2	-1.15	8.35809e-05
ENSMUSG00000005251	RIPK4	-4.367	5.04578e-06
ENSMUSG00000005267	ZFP287	-1.713	3.62222e-17
ENSMUSG00000005268	PRLR	-2.923	0.00223401
ENSMUSG00000005338	CADM3	3.314	2.90529e-54
ENSMUSG00000005339	FCER1A	8.799	4.5858e-172
ENSMUSG00000005355	CASP14	-3.489	0.000369794
ENSMUSG00000005360	SLC1A3	7.88	5.88834e-43
ENSMUSG00000005362	CRBN	1.037	4.8371e-22
ENSMUSG00000005364	IL5RA	-1.962	2.76705e-11
ENSMUSG00000005370	MSH6	1.099	6.75989e-23
ENSMUSG00000005410	MCM5	2.71	1.25611e-92
ENSMUSG00000005413	HMOX1	-1.132	0.00463273
ENSMUSG00000005417	MPRIP	-1.001	0.00019272
ENSMUSG00000005470	ASF1B	3.501	2.20755e-100
ENSMUSG00000005481	DDX39	1.305	1.65437e-31
ENSMUSG00000005540	FCER2A	-2.459	4.15839e-15
ENSMUSG00000005547	CYP2A5	-5.38	2.52759e-06
ENSMUSG00000005566	TRIM28	1.189	6.15015e-20
ENSMUSG00000005583	MEF2C	-2.683	1.53394e-35
ENSMUSG00000005667	MTHFD2	1.599	5.47135e-06
ENSMUSG00000005672	KIT	5.883	2.05555e-110
ENSMUSG00000005674	TOMM40L	1.039	1.20486e-17
ENSMUSG00000005683	CS	1.489	4.40599e-32
ENSMUSG00000005686	AMPD3	1.178	9.50588e-09
ENSMUSG00000005718	TFAP4	1.377	1.63591e-20
ENSMUSG00000005732	RANBP1	1.949	4.80565e-57
ENSMUSG00000005779	PSMB4	1.212	1.86046e-41
ENSMUSG00000005802	SLC30A4	-1.028	2.13237e-09
ENSMUSG00000005824	TNFSF14	-1.416	0.000381734
ENSMUSG00000005846	RSL1D1	1.357	7.28269e-25
ENSMUSG00000005873	REEP5	1.76	2.28025e-54
ENSMUSG00000005883	SPO11	-1.536	8.00428e-12
ENSMUSG00000005917	OTX1	-3.379	0.00717224
ENSMUSG00000005947	ITGAE	-1.452	2.78004e-07
ENSMUSG00000005958	EPHB3	-3.246	5.48607e-05
ENSMUSG00000005968	TUFT1	-2.464	1.16111e-06
ENSMUSG00000005973	RCN1	2.267	4.72126e-58
ENSMUSG00000005986	ANKRD13D	-1.966	2.88877e-16
ENSMUSG00000006014	PRG4	-1.141	0.00019482
ENSMUSG00000006095	TBCB	1.514	7.87183e-50
ENSMUSG00000006143	UPK3BL	-3.029	0.000257015
ENSMUSG00000006154	EPS8L1	-1.052	6.98444e-06
ENSMUSG00000006169	CLINT1	1.057	1.05568e-20
ENSMUSG00000006179	PRSS16	-1.09	0.0010023
ENSMUSG00000006235	EPOR	3.231	2.27378e-12
ENSMUSG00000006301	TMBIM1	-1.288	0.0377999
ENSMUSG00000006310	ZBTB32	1.249	1.15901e-07
ENSMUSG00000006315	TMEM147	1.817	7.51937e-46
ENSMUSG00000006342	SUSD2	3.043	5.9423e-29
ENSMUSG00000006344	GGT5	-1.428	0.000192727
ENSMUSG00000006356	CRIP2	3.133	1.41939e-44
ENSMUSG00000006360	CRIP1	2.547	5.5446e-73
ENSMUSG00000006362	CBFA2T3	1.684	9.20358e-53
ENSMUSG00000006369	FBLN1	-3.962	1.71917e-05
ENSMUSG00000006373	PGRMC1	1.854	8.63305e-21
ENSMUSG00000006386	TEK	6.414	3.67143e-35
ENSMUSG00000006389	MPL	-3.122	0.000193946
ENSMUSG00000006390	ELOVL1	2.032	6.82314e-54
ENSMUSG00000006398	CDC20	4.238	1.72381e-209
ENSMUSG00000006403	ADAMTS4	-3.626	0.00178681
ENSMUSG00000006411	NECTIN4	-2.269	6.20917e-05
ENSMUSG00000006435	NEURL1A	-3.286	0.000107166
ENSMUSG00000006442	SRM	3.522	2.10575e-167
ENSMUSG00000006445	EPHA2	-2.164	0.0047237
ENSMUSG00000006457	ACTN3	3.153	5.13393e-13
ENSMUSG00000006462	A530013C23RIK	-3.12	1.01361e-08
ENSMUSG00000006476	NSMF	-1.137	1.6005e-08
ENSMUSG00000006494	PDK1	-1.49	3.814e-10
ENSMUSG00000006498	PTBP1	1.049	2.60982e-15
ENSMUSG00000006567	ATP7B	4.045	9.89178e-11
ENSMUSG00000006576	SLC4A3	-1.942	0.000176011
ENSMUSG00000006586	RUNX1T1	2.104	0.00258357
ENSMUSG00000006587	SNAI3	-1.233	2.70475e-07
ENSMUSG00000006589	APRT	1.56	1.07265e-24
ENSMUSG00000006641	SLC5A6	1.428	3.57262e-25
ENSMUSG00000006675	P4HTM	2.423	1.69372e-58
ENSMUSG00000006678	POLA1	1.939	2.08911e-13
ENSMUSG00000006715	GMNN	3.11	7.61056e-159
ENSMUSG00000006720	ZFP184	-1.785	2.86655e-08
ENSMUSG00000006728	CDK4	1.6	1.87139e-33
ENSMUSG00000006736	TSPAN31	1.615	3.89668e-37
ENSMUSG00000006763	SAAL1	1.832	1.41943e-42
ENSMUSG00000006777	KRT23	-3.414	0.000114225
ENSMUSG00000006782	CNP	-1.457	7.26139e-07
ENSMUSG00000006906	STAMBP	1.184	1.20765e-41
ENSMUSG00000006930	HAP1	-1.813	2.54198e-08
ENSMUSG00000006998	PSMD2	1.305	2.26795e-39
ENSMUSG00000007034	SLC44A4	-3.516	4.6969e-05
ENSMUSG00000007035	MSH5	1.418	1.17706e-21
ENSMUSG00000007036	ABHD16A	1.824	1.13378e-39
ENSMUSG00000007039	DDAH2	4.262	4.9037e-134
ENSMUSG00000007041	CLIC1	1.796	2.09764e-48
ENSMUSG00000007050	LSM2	1.512	1.28543e-34
ENSMUSG00000007080	POLE	3.15	2.39284e-176
ENSMUSG00000007216	ZFP775	-1.006	5.66611e-06
ENSMUSG00000007279	SCUBE2	8.992	6.73779e-46
ENSMUSG00000007415	GATAD1	-2.084	0.00182485
ENSMUSG00000007458	M6PR	1.065	1.4637e-10
ENSMUSG00000007570	FANCE	1.729	1.90026e-63
ENSMUSG00000007617	HOMER1	1.49	1.80931e-18
ENSMUSG00000007659	BCL2L1	-2.028	0.0196166
ENSMUSG00000007670	KHSRP	1.047	1.46452e-21
ENSMUSG00000007739	CCT4	1.213	2.47487e-14
ENSMUSG00000007777	0610009B22RIK	1.147	2.40494e-12
ENSMUSG00000007783	CPT1C	3.341	3.30563e-29
ENSMUSG00000007872	ID3	-1.984	2.19654e-14
ENSMUSG00000007891	CTSD	-1.175	0.0142513
ENSMUSG00000007908	HMGCLL1	-2.725	4.07014e-10
ENSMUSG00000008136	FHL2	-2.312	3.19019e-10
ENSMUSG00000008193	SPIB	-2.471	5.61284e-18
ENSMUSG00000008373	PRPF31	1.1	8.60111e-21
ENSMUSG00000008398	ELK3	-1.773	5.65719e-16
ENSMUSG00000008496	POU2F2	-1.758	1.1332e-15
ENSMUSG00000008575	NFIB	-4.25	3.35021e-05
ENSMUSG00000008601	RAB25	-2.802	1.06003e-05
ENSMUSG00000008604	UBQLN4	1.01	1.76088e-14
ENSMUSG00000008658	RBFOX1	4.981	5.67776e-20
ENSMUSG00000008730	HIPK1	-1.109	0.0340036
ENSMUSG00000008734	GPRC5B	-1.444	2.79371e-05
ENSMUSG00000008822	ACYP1	1.284	5.28953e-25
ENSMUSG00000008843	CLDN13	5.709	7.25108e-30
ENSMUSG00000008999	BMP7	5.622	7.70191e-132
ENSMUSG00000009092	DERL3	-2.226	4.83827e-06
ENSMUSG00000009112	BCL2L13	2.017	4.11346e-141
ENSMUSG00000009246	TRPM5	-2.367	3.29592e-11
ENSMUSG00000009291	PTTG1IP	-2.511	0.00111967
ENSMUSG00000009292	TRPM2	-3.119	5.85988e-13
ENSMUSG00000009350	MPO	4.053	1.15872e-18
ENSMUSG00000009376	MET	-1.245	0.00122683
ENSMUSG00000009378	SLC16A12	-4.169	3.79575e-06
ENSMUSG00000009551	6330409D20RIK	-4.912	6.76232e-10
ENSMUSG00000009575	CBX5	1.933	1.33226e-110
ENSMUSG00000009588	ST6GALNAC1	-3.96	4.69177e-05
ENSMUSG00000009614	SARDH	-1.873	0.00384623
ENSMUSG00000009621	VAV2	-1.928	6.61337e-26
ENSMUSG00000009628	TEX15	-2.541	4.35523e-08
ENSMUSG00000009633	G0S2	-2.396	0.00364197
ENSMUSG00000009654	OIT3	-1.859	0.00898543
ENSMUSG00000009681	BCR	-2.669	4.25071e-07
ENSMUSG00000009687	FXYD5	-1.254	2.41564e-06
ENSMUSG00000009731	KCND1	1.228	2.72573e-08
ENSMUSG00000009733	TFCP2	3.488	2.50118e-144
ENSMUSG00000009739	POU6F1	-2.017	1.04555e-22
ENSMUSG00000009772	NUAK2	-1.528	3.22668e-12
ENSMUSG00000009905	KDSR	1.198	6.01335e-26
ENSMUSG00000010021	KIF19A	-2.268	3.29183e-18
ENSMUSG00000010044	ZMYND10	-1.034	0.000236998
ENSMUSG00000010047	HYAL2	2.421	8.04044e-64
ENSMUSG00000010048	IFRD2	1.346	0.000475224
ENSMUSG00000010066	CACNA2D2	-1.061	1.89537e-05
ENSMUSG00000010080	EPN3	-3.157	7.35728e-05
ENSMUSG00000010095	SLC3A2	1.943	9.77036e-18
ENSMUSG00000010136	PIFO	-1.912	2.41944e-07
ENSMUSG00000010142	TNFRSF13B	-1.006	1.08478e-06
ENSMUSG00000010154	SPIRE2	2.585	8.50816e-08
ENSMUSG00000010307	TMEM86A	-1.007	0.000824236
ENSMUSG00000010406	MRPL52	1.961	1.16409e-61
ENSMUSG00000010461	EYA4	7.665	1.80645e-79
ENSMUSG00000010601	APOL7A	-3.165	0.000130174
ENSMUSG00000010607	PIGYL	1.628	2.78215e-28
ENSMUSG00000010609	PSEN2	2.026	9.7837e-99
ENSMUSG00000010660	PLCD1	-1.159	0.0306535
ENSMUSG00000010663	FADS1	3.885	3.42617e-167
ENSMUSG00000010721	LMBR1	-1.315	9.69979e-05
ENSMUSG00000010751	TNFRSF22	-1.196	8.16534e-07
ENSMUSG00000010797	WNT2	11.798	4.77781e-82
ENSMUSG00000010911	APIP	2.399	2.96831e-78
ENSMUSG00000010914	PDHX	1.245	2.22067e-40
ENSMUSG00000011008	MCOLN2	-1.678	1.85773e-12
ENSMUSG00000011034	SLC5A1	-3.441	5.72034e-05
ENSMUSG00000011114	TBRG1	1.53	2.19042e-42
ENSMUSG00000011179	ODC1	-1.645	0.0183658
ENSMUSG00000011254	THG1L	1.244	1.53649e-18
ENSMUSG00000011256	ADAM19	-2.101	1.10783e-15
ENSMUSG00000011257	PABPC4	1.18	0.0010642
ENSMUSG00000011263	EXOC3L2	-1.169	0.0175974
ENSMUSG00000011305	PLIN5	-3.667	1.26854e-06
ENSMUSG00000011752	PGAM1	1.147	3.2514e-10
ENSMUSG00000011837	SNAPC2	1.328	3.46512e-23
ENSMUSG00000012123	CRYBG2	-2.795	6.55257e-05
ENSMUSG00000012126	UBXN11	-1.827	2.04502e-31
ENSMUSG00000012187	MOGAT1	-3.302	0.0154721
ENSMUSG00000012350	NA	-1.898	0.0119485
ENSMUSG00000012428	STEAP4	-2.156	0.000313484
ENSMUSG00000012429	MPLKIP	1.084	4.29408e-18
ENSMUSG00000012443	KIF11	4.386	4.41976e-35
ENSMUSG00000012483	RPA3	1.806	1.28004e-36
ENSMUSG00000012519	MLKL	2.992	4.11062e-54
ENSMUSG00000012705	RETN	-3.047	2.60452e-07
ENSMUSG00000012819	CDH23	-4.326	7.42055e-07
ENSMUSG00000013033	ADGRL1	2.815	1.42884e-94
ENSMUSG00000013076	AMOTL1	2.018	0.00110274
ENSMUSG00000013155	ENKD1	2.306	6.08738e-49
ENSMUSG00000013236	PTPRS	1.325	1.27106e-20
ENSMUSG00000013275	SLC41A1	-1.353	7.15566e-11
ENSMUSG00000013338	FER1L4	-3.366	0.000341239
ENSMUSG00000013353	4931406B18RIK	-3.398	6.45855e-06
ENSMUSG00000013418	B4GALNT2	-3.05	5.91593e-20
ENSMUSG00000013523	BCAS1	-2.687	0.00032778
ENSMUSG00000013539	TANGO2	1.796	2.95171e-23
ENSMUSG00000013593	NDUFS2	1.07	1.65491e-32
ENSMUSG00000013611	SNX31	-3.589	1.67259e-05
ENSMUSG00000013629	CAD	1.402	9.9387e-24
ENSMUSG00000013662	ATAD1	1.003	1.50567e-15
ENSMUSG00000013698	PEA15A	-1.459	0.000383483
ENSMUSG00000013766	LY6G6E	-3.647	0.00104158
ENSMUSG00000013936	MYL2	-2.458	4.60545e-05
ENSMUSG00000013974	MCEMP1	-1.988	2.84328e-05
ENSMUSG00000014030	PAX5	-2.686	1.27158e-18
ENSMUSG00000014075	TCTEX1D2	-1.686	2.13089e-07
ENSMUSG00000014164	KLHL3	-1.134	1.20752e-05
ENSMUSG00000014177	TVP23B	1.279	7.3618e-42
ENSMUSG00000014361	MERTK	3.199	4.06732e-10
ENSMUSG00000014444	PIEZO1	1.276	1.04434e-26
ENSMUSG00000014453	BLK	-2.193	3.8754e-18
ENSMUSG00000014503	PKD2L2	1.522	0.000167386
ENSMUSG00000014543	KLRA17	-1.343	0.00338154
ENSMUSG00000014599	CSF1	-2.058	6.82616e-06
ENSMUSG00000014606	SLC25A11	1.537	1.23176e-41
ENSMUSG00000014633	CMC2	2.07	4.59631e-69
ENSMUSG00000014668	CHFR	1.457	8.82533e-84
ENSMUSG00000014686	CEACAM16	-2.338	3.40902e-13
ENSMUSG00000014725	ADAM28	-3.726	0.000126265
ENSMUSG00000014748	TEX261	1.155	2.4735e-26
ENSMUSG00000014769	PSMB1	1.106	1.11108e-28
ENSMUSG00000014773	DLL1	-2.583	2.09856e-18
ENSMUSG00000014786	SLC9A5	-1.832	5.10712e-05
ENSMUSG00000014846	TPPP3	1.586	1.63667e-09
ENSMUSG00000014856	TMEM208	1.168	6.10409e-33
ENSMUSG00000014859	E2F4	1.118	7.89433e-29
ENSMUSG00000014907	NAF1	1.79	1.78825e-45
ENSMUSG00000014932	YES1	-1.294	6.97959e-06
ENSMUSG00000014956	PPP1CB	-2.295	0.00591059
ENSMUSG00000014980	TSEN15	1.452	2.78597e-17
ENSMUSG00000015053	GATA2	3.842	1.76773e-28
ENSMUSG00000015093	CLIC3	-2.594	0.000308296
ENSMUSG00000015094	NPDC1	-2.214	0.0074114
ENSMUSG00000015134	ALDH1A3	-3.618	0.00281696
ENSMUSG00000015143	ACTN1	-2.052	0.000172721
ENSMUSG00000015176	NOLC1	1.27	1.45183e-18
ENSMUSG00000015189	CASD1	-1.108	0.00244657
ENSMUSG00000015202	CNKSR3	-1.997	1.22854e-50
ENSMUSG00000015217	HMGB3	4.978	5.00836e-210
ENSMUSG00000015222	MAP2	-2.337	6.78463e-10
ENSMUSG00000015243	ABCA1	-2.344	6.21973e-27
ENSMUSG00000015289	LAGE3	1.121	1.36303e-20
ENSMUSG00000015290	UBL4A	1.077	1.75216e-34
ENSMUSG00000015291	GDI1	-1.094	4.13286e-05
ENSMUSG00000015312	GADD45B	-2.547	2.0401e-06
ENSMUSG00000015314	SLAMF6	-1.766	1.53475e-15
ENSMUSG00000015316	SLAMF1	-3.533	2.39865e-05
ENSMUSG00000015340	CYBB	-1.241	1.58659e-05
ENSMUSG00000015377	DENND6B	-1.571	2.56635e-12
ENSMUSG00000015452	AGER	-1.094	7.55148e-07
ENSMUSG00000015533	ITGA2	-3.814	7.0758e-06
ENSMUSG00000015542	NAT9	2.197	5.90197e-62
ENSMUSG00000015597	ZFP318	-2.893	3.68472e-30
ENSMUSG00000015599	TTBK1	-2.475	9.73676e-19
ENSMUSG00000015619	GATA3	2.237	3.71536e-51
ENSMUSG00000015647	LAMA5	-1.683	0.000984873
ENSMUSG00000015671	PSMA2	1.103	4.42463e-30
ENSMUSG00000015714	CERS2	1.373	4.43531e-39
ENSMUSG00000015745	PLEKHO1	-1.556	1.36068e-23
ENSMUSG00000015759	CNIH1	1.187	2.0512e-21
ENSMUSG00000015776	MED22	1.145	7.756e-34
ENSMUSG00000015806	QDPR	1.472	5.953e-48
ENSMUSG00000015850	ADAMTSL4	-1.75	0.0025456
ENSMUSG00000015852	FCRLS	1.683	8.33228e-05
ENSMUSG00000015879	FAM184B	5.011	1.2385e-28
ENSMUSG00000015880	NCAPG	4.32	1.43156e-33
ENSMUSG00000015889	LTA4H	1.322	7.58034e-23
ENSMUSG00000015950	NCF1	-1.768	1.28036e-15
ENSMUSG00000015966	IL17RB	-1.247	0.000132835
ENSMUSG00000015968	CACNA1D	-2.186	2.04881e-17
ENSMUSG00000015970	CHDH	-1.3	0.00527309
ENSMUSG00000015980	LRRC27	-2.13	3.0979e-07
ENSMUSG00000016087	FLI1	-1.201	0.000198792
ENSMUSG00000016128	STARD13	6.835	4.41313e-31
ENSMUSG00000016194	HSD11B1	-1.067	8.82954e-09
ENSMUSG00000016200	SYT14	-2.226	0.0175304
ENSMUSG00000016206	H2-M3	-1.258	1.43193e-15
ENSMUSG00000016255	TUBB1	-2.833	0.00063084
ENSMUSG00000016257	PRELID3B	1.629	6.39094e-75
ENSMUSG00000016308	UBE2A	1.053	3.87143e-23
ENSMUSG00000016319	SLC25A5	1.475	4.5136e-32
ENSMUSG00000016382	PLS3	-3.101	9.25685e-05
ENSMUSG00000016386	MPPED2	7.214	6.69911e-47
ENSMUSG00000016458	WT1	10.242	3.08703e-79
ENSMUSG00000016487	PPFIBP1	-1.986	4.69469e-07
ENSMUSG00000016493	CD46	-1.424	2.39576e-10
ENSMUSG00000016494	CD34	1.439	0.000420355
ENSMUSG00000016495	PLGRKT	1.444	3.62989e-43
ENSMUSG00000016496	CD274	-1.088	0.0107277
ENSMUSG00000016503	GTF3A	1.519	2.40035e-29
ENSMUSG00000016526	DYRK3	4.228	5.79679e-158
ENSMUSG00000016534	LAMP2	-1.072	0.0249207
ENSMUSG00000016552	FOXRED2	-1.103	1.09144e-06
ENSMUSG00000016554	EIF3D	1.212	8.98487e-18
ENSMUSG00000016624	PHF21B	-1.013	7.48614e-06
ENSMUSG00000016637	IFT27	1.142	4.38458e-22
ENSMUSG00000016664	PACSIN2	-1.459	0.00858698
ENSMUSG00000016756	CMAH	-2.392	3.52899e-27
ENSMUSG00000016757	TTLL12	2.776	8.46965e-173
ENSMUSG00000016833	MRPS18C	1.336	1.60294e-22
ENSMUSG00000017002	SLPI	-1.483	0.000311415
ENSMUSG00000017009	SDC4	-3.099	1.18954e-32
ENSMUSG00000017057	IL13RA1	-1.474	0.000238452
ENSMUSG00000017132	CYTH1	-1.226	3.62738e-12
ENSMUSG00000017144	RND3	-1.682	2.9385e-06
ENSMUSG00000017146	BRCA1	2.524	8.98531e-110
ENSMUSG00000017167	CNTNAP1	-2.719	6.10634e-06
ENSMUSG00000017176	NT5C3B	1.396	1.60947e-20
ENSMUSG00000017221	PSMD3	1.354	3.0759e-33
ENSMUSG00000017286	GLOD4	1.235	5.34331e-29
ENSMUSG00000017314	MPP2	2.635	9.2116e-06
ENSMUSG00000017316	PPY	7.833	6.18602e-50
ENSMUSG00000017376	NLK	-1.572	0.0019025
ENSMUSG00000017400	STAC2	-2.251	4.83575e-18
ENSMUSG00000017417	PLXDC1	2.822	8.07268e-54
ENSMUSG00000017446	C1QTNF1	4.938	1.46626e-32
ENSMUSG00000017466	TIMP2	-1.502	4.35687e-05
ENSMUSG00000017499	CDC6	3.178	3.41128e-26
ENSMUSG00000017550	ATAD5	2.685	5.7191e-56
ENSMUSG00000017615	TNFAIP1	-1.287	1.47562e-20
ENSMUSG00000017639	RAB11FIP4	-1.61	9.25663e-09
ENSMUSG00000017652	CD40	-2.115	1.96821e-17
ENSMUSG00000017679	TTPAL	-1.13	4.07478e-08
ENSMUSG00000017692	RHBDL3	-1.559	0.000282583
ENSMUSG00000017697	ADA	2.902	3.36199e-65
ENSMUSG00000017713	THA1	-1.178	3.32924e-09
ENSMUSG00000017716	BIRC5	3.468	2.80195e-20
ENSMUSG00000017721	PIGT	1.002	8.62476e-15
ENSMUSG00000017723	WFDC2	-4.807	0.000245635
ENSMUSG00000017737	MMP9	-1.961	0.000458601
ENSMUSG00000017740	SLC12A5	-1.493	0.000123951
ENSMUSG00000017765	SLC12A4	2.227	1.97389e-70
ENSMUSG00000017767	SPATA25	-2.96	7.66662e-10
ENSMUSG00000017861	MYBL2	3.56	2.06938e-62
ENSMUSG00000017897	EYA2	-1.645	1.20597e-08
ENSMUSG00000017978	CADPS2	-3.156	0.00705676
ENSMUSG00000018001	CYTH3	2.802	1.87656e-63
ENSMUSG00000018102	HIST1H2BC	-2.22	0.00501518
ENSMUSG00000018143	MAFK	1.13	4.14061e-22
ENSMUSG00000018166	ERBB3	2.373	5.51236e-23
ENSMUSG00000018168	IKZF3	-2.379	1.18169e-20
ENSMUSG00000018169	MFNG	-1.357	1.67139e-13
ENSMUSG00000018189	UCHL5	1.794	6.42349e-63
ENSMUSG00000018199	TROVE2	-2.41	0.000966014
ENSMUSG00000018239	ZCCHC10	1.887	1.91167e-60
ENSMUSG00000018286	PSMB6	1.284	2.46174e-32
ENSMUSG00000018287	SPAG7	1.059	6.70047e-20
ENSMUSG00000018339	GPX3	1.947	2.09831e-07
ENSMUSG00000018341	IL12RB2	2.09	3.50942e-17
ENSMUSG00000018362	KPNA2	1.698	2.60249e-34
ENSMUSG00000018363	SMURF2	-1.099	9.07103e-05
ENSMUSG00000018378	CUEDC1	-1.236	0.0239295
ENSMUSG00000018379	SRSF1	1.06	7.61849e-25
ENSMUSG00000018381	ABI3	-1.042	8.41252e-11
ENSMUSG00000018395	KIF3A	2.997	8.32574e-90
ENSMUSG00000018398	2019-09-08	5.618	9.88235e-73
ENSMUSG00000018417	MYO1B	-3.204	0.00488339
ENSMUSG00000018427	YPEL2	-1.559	0.00128458
ENSMUSG00000018428	AKAP1	3.978	2.08482e-164
ENSMUSG00000018446	C1QBP	1.992	9.75669e-48
ENSMUSG00000018449	RPAIN	1.25	1.63353e-22
ENSMUSG00000018509	CENPV	2.914	2.60253e-21
ENSMUSG00000018537	PCGF2	1.837	1.77088e-11
ENSMUSG00000018548	TRIM37	1.427	4.92521e-08
ENSMUSG00000018565	ELP5	1.859	6.5536e-90
ENSMUSG00000018566	SLC2A4	-3.686	0.00121162
ENSMUSG00000018569	CLDN7	-3.823	0.000107261
ENSMUSG00000018574	ACADVL	1.147	2.68216e-28
ENSMUSG00000018583	G3BP1	1.148	1.39742e-24
ENSMUSG00000018585	ATOX1	-1.35	0.0222307
ENSMUSG00000018648	DUSP14	-2.68	0.000189888
ENSMUSG00000018651	TADA2A	1.058	2.40404e-15
ENSMUSG00000018677	SLC25A39	-2.275	0.0167357
ENSMUSG00000018698	LHX1	-3.905	4.0857e-07
ENSMUSG00000018750	ZBTB4	-1.551	9.03311e-14
ENSMUSG00000018770	ATP5G3	1.315	3.96461e-35
ENSMUSG00000018819	LSP1	-1.525	2.26101e-09
ENSMUSG00000018820	ZFYVE27	1.084	2.27218e-25
ENSMUSG00000018830	MYH11	2.231	9.43189e-06
ENSMUSG00000018844	FNDC8	6.262	5.464e-41
ENSMUSG00000018848	RARS	1.224	2.33218e-31
ENSMUSG00000018849	WWC1	-3.21	9.27197e-05
ENSMUSG00000018882	MRPL45	1.368	3.18245e-27
ENSMUSG00000018899	IRF1	-1.684	8.1579e-19
ENSMUSG00000018907	ALOX12E	-4.41	9.06816e-06
ENSMUSG00000018920	CXCL16	-1.671	0.00938803
ENSMUSG00000018924	ALOX15	-4.038	5.86617e-10
ENSMUSG00000018927	CCL6	-1.341	0.000174687
ENSMUSG00000018930	CCL4	-3.208	0.000589474
ENSMUSG00000018932	MAP2K3	-1.236	0.0420864
ENSMUSG00000018965	YWHAH	-2.338	0.00132923
ENSMUSG00000018983	E2F2	-1.946	0.00860115
ENSMUSG00000019027	DNAH1	-2.247	1.64115e-08
ENSMUSG00000019102	ALDH3A1	-3.054	0.000335747
ENSMUSG00000019124	SCRN1	3.59	1.07556e-10
ENSMUSG00000019139	ISYNA1	2.224	4.28214e-64
ENSMUSG00000019158	TMEM160	1.543	3.89141e-31
ENSMUSG00000019179	MDH2	1.135	1.60385e-28
ENSMUSG00000019194	SCN1B	1.687	9.0226e-06
ENSMUSG00000019214	CHTF18	1.857	2.52713e-41
ENSMUSG00000019301	HSD17B1	-1.298	1.86252e-06
ENSMUSG00000019312	GRB7	-2.647	1.71258e-07
ENSMUSG00000019320	NOXO1	-1.967	2.11643e-07
ENSMUSG00000019368	SEC14L4	-3.208	0.0461778
ENSMUSG00000019373	COPS3	1.063	1.76732e-34
ENSMUSG00000019429	FFAR3	-3.608	1.62148e-09
ENSMUSG00000019437	TLCD1	1.656	1.39888e-18
ENSMUSG00000019461	PLSCR3	1.371	1.40696e-31
ENSMUSG00000019467	ARHGEF25	9.213	4.15544e-167
ENSMUSG00000019471	CDC37	1.129	2.35827e-35
ENSMUSG00000019478	RAB4A	5.464	3.35132e-172
ENSMUSG00000019494	COPS6	1.257	4.02133e-47
ENSMUSG00000019505	UBB	-1.582	0.014153
ENSMUSG00000019528	GYG	1.222	7.65856e-12
ENSMUSG00000019579	MYDGF	1.22	8.12808e-26
ENSMUSG00000019590	CYB561	3.019	7.58849e-20
ENSMUSG00000019689	FMC1	1.823	7.7022e-40
ENSMUSG00000019699	AKT3	-1.417	0.0031855
ENSMUSG00000019726	LYST	-1.093	5.3541e-07
ENSMUSG00000019737	SYNE4	-1.235	9.64327e-07
ENSMUSG00000019761	KRT10	-1.446	0.0110518
ENSMUSG00000019768	ESR1	-1.991	5.57938e-23
ENSMUSG00000019773	FBXO5	2.006	4.42973e-40
ENSMUSG00000019777	HDAC2	1.414	1.18416e-30
ENSMUSG00000019779	FRK	-3.153	0.000214234
ENSMUSG00000019795	PCMT1	-1.381	0.031526
ENSMUSG00000019814	LTV1	1.038	2.84451e-16
ENSMUSG00000019822	SMPD2	-1.389	4.38445e-15
ENSMUSG00000019828	GRM1	-2.962	2.53887e-06
ENSMUSG00000019842	TRAF3IP2	-1.812	4.69691e-18
ENSMUSG00000019845	TUBE1	1.116	1.53186e-12
ENSMUSG00000019846	LAMA4	3.103	0.000438206
ENSMUSG00000019849	PREP	2.173	1.59091e-24
ENSMUSG00000019851	PERP	1.511	0.0267791
ENSMUSG00000019853	HEBP2	-4.322	9.0656e-05
ENSMUSG00000019856	FAM184A	-1.384	0.0366392
ENSMUSG00000019857	ASF1A	1.026	3.84206e-17
ENSMUSG00000019864	RTN4IP1	-3.086	2.37443e-05
ENSMUSG00000019866	CRYBG1	-1.276	1.26144e-14
ENSMUSG00000019872	SMPDL3A	1.14	5.54472e-10
ENSMUSG00000019876	PKIB	-1.626	6.8042e-12
ENSMUSG00000019883	ECHDC1	1.787	1.14299e-38
ENSMUSG00000019889	PTPRK	-3.343	1.32921e-05
ENSMUSG00000019891	DCBLD1	-1.504	1.42614e-08
ENSMUSG00000019920	LIMS1	-1.1	0.0404322
ENSMUSG00000019942	CDK1	5.794	4.2179e-136
ENSMUSG00000019944	RHOBTB1	4.44	4.38499e-139
ENSMUSG00000019947	ARID5B	-1.539	5.42523e-12
ENSMUSG00000019960	DUSP6	-2.004	3.10013e-13
ENSMUSG00000019961	TMPO	1.037	3.37975e-14
ENSMUSG00000019970	SGK1	-1.32	1.28529e-09
ENSMUSG00000019971	CEP290	2.276	1.93636e-36
ENSMUSG00000019975	IKBIP	1.24	5.48427e-13
ENSMUSG00000019977	HBS1L	1.352	3.7422e-68
ENSMUSG00000019978	EPB41L2	-1.532	4.74257e-40
ENSMUSG00000019979	APAF1	1.119	1.14041e-21
ENSMUSG00000019982	MYB	4.132	3.48895e-275
ENSMUSG00000019986	AHI1	1.16	2.20602e-19
ENSMUSG00000019987	ARG1	-2.845	0.0073833
ENSMUSG00000019988	NEDD1	1.3	1.34973e-24
ENSMUSG00000019989	ENPP3	-3.472	0.000129292
ENSMUSG00000019990	PDE7B	-4.405	9.06739e-07
ENSMUSG00000019992	MTFR2	2.915	2.36572e-25
ENSMUSG00000019996	MAP7	1.84	2.20932e-22
ENSMUSG00000019997	CCN2	-2.741	0.0180864
ENSMUSG00000019998	STX7	-1.014	0.00940998
ENSMUSG00000020010	VNN3	-1.822	6.73354e-05
ENSMUSG00000020018	SNRPF	1.556	1.32269e-40
ENSMUSG00000020019	NTN4	5.96	4.91159e-51
ENSMUSG00000020021	FGD6	1.297	2.71981e-32
ENSMUSG00000020022	NDUFA12	1.792	9.57639e-65
ENSMUSG00000020023	TMCC3	2.058	1.34319e-36
ENSMUSG00000020027	SOCS2	5.315	4.281e-114
ENSMUSG00000020032	NUAK1	3.668	2.11903e-60
ENSMUSG00000020038	CRY1	1.29	1.65203e-28
ENSMUSG00000020042	BTBD11	-1.056	1.30288e-06
ENSMUSG00000020044	TIMP3	-3.786	4.07764e-05
ENSMUSG00000020053	IGF1	3.727	5.1427e-09
ENSMUSG00000020062	SLC5A8	-3.71	2.69374e-05
ENSMUSG00000020070	RUFY2	-1.219	1.16655e-13
ENSMUSG00000020072	PBLD2	-2.163	1.90222e-07
ENSMUSG00000020075	DDX21	1.273	1.62119e-20
ENSMUSG00000020078	VPS26A	1.185	4.9116e-24
ENSMUSG00000020089	PPA1	2.367	2.16704e-73
ENSMUSG00000020092	PALD1	-1.068	0.0021471
ENSMUSG00000020097	SGPL1	-1.311	1.89622e-09
ENSMUSG00000020099	UNC5B	-3.661	0.000100338
ENSMUSG00000020102	SLC16A7	-1.527	2.89879e-10
ENSMUSG00000020105	LRIG3	-1.906	2.66649e-09
ENSMUSG00000020108	DDIT4	1.556	8.21687e-15
ENSMUSG00000020111	MICU1	-1.52	0.00179738
ENSMUSG00000020114	CAND1	1.147	1.29088e-15
ENSMUSG00000020116	PNO1	1.46	7.25962e-32
ENSMUSG00000020120	PLEK	-1.998	0.00613822
ENSMUSG00000020121	SRGAP1	-1.674	0.00359412
ENSMUSG00000020122	EGFR	-2.901	0.000213664
ENSMUSG00000020125	ELANE	3.624	1.23685e-05
ENSMUSG00000020131	PCSK4	1.263	6.04703e-13
ENSMUSG00000020134	PELI1	-1.112	1.08148e-13
ENSMUSG00000020140	LGR5	-2.69	8.8127e-10
ENSMUSG00000020155	KCNMB1	-2.133	0.0130899
ENSMUSG00000020160	MEIS1	1.29	0.0017478
ENSMUSG00000020173	COBL	-3.047	0.000477999
ENSMUSG00000020175	RAB36	-2.595	6.09095e-06
ENSMUSG00000020176	GRB10	3.44	4.59708e-11
ENSMUSG00000020180	SNRPD3	1.328	9.75676e-23
ENSMUSG00000020182	DDC	4.433	1.09164e-34
ENSMUSG00000020183	CPM	-2.203	6.1105e-26
ENSMUSG00000020185	E2F7	5.951	7.16443e-101
ENSMUSG00000020186	CSRP2	-1.862	4.0159e-10
ENSMUSG00000020219	TIMM13	1.344	5.62431e-32
ENSMUSG00000020253	PPM1M	-1.183	4.91853e-14
ENSMUSG00000020262	ADARB1	-3.399	1.01608e-06
ENSMUSG00000020263	APPL2	-1.824	6.72449e-21
ENSMUSG00000020265	SUMO3	1.127	2.3987e-27
ENSMUSG00000020267	HINT1	1.63	1.14957e-31
ENSMUSG00000020275	REL	-1.92	5.27714e-21
ENSMUSG00000020279	IL9R	2.869	8.43535e-44
ENSMUSG00000020282	RHBDF1	1.439	1.61589e-10
ENSMUSG00000020295	HBQ1A	-2.308	0.0168775
ENSMUSG00000020300	CPEB4	-1.4	0.0164307
ENSMUSG00000020303	STC2	4.035	4.88537e-28
ENSMUSG00000020305	ASB3	-1.474	0.00257506
ENSMUSG00000020309	CHAC2	-1.548	0.0299593
ENSMUSG00000020311	ERLEC1	-1.119	0.0241249
ENSMUSG00000020319	WDPCP	-1.755	0.00929025
ENSMUSG00000020328	NUDCD2	2.327	1.22425e-104
ENSMUSG00000020330	HMMR	4.011	1.40675e-19
ENSMUSG00000020333	ACSL6	-5.542	0.000462472
ENSMUSG00000020358	HNRNPAB	1.447	9.98257e-31
ENSMUSG00000020363	GFPT2	3.405	1.32675e-17
ENSMUSG00000020368	CANX	1.023	5.49102e-15
ENSMUSG00000020372	RACK1	1.345	1.26499e-15
ENSMUSG00000020376	RNF130	2.011	5.75661e-30
ENSMUSG00000020377	LTC4S	4.438	3.11183e-49
ENSMUSG00000020380	RAD50	1.308	1.31474e-41
ENSMUSG00000020383	IL13	8.159	1.27658e-83
ENSMUSG00000020389	CDKL3	-1.636	2.63342e-06
ENSMUSG00000020390	UBE2B	-1.597	0.0154918
ENSMUSG00000020392	CDKN2AIPNL	1.049	4.15353e-23
ENSMUSG00000020393	KREMEN1	-1.411	2.34421e-15
ENSMUSG00000020396	NEFH	4.374	1.62636e-89
ENSMUSG00000020397	MED7	1.1	4.70136e-19
ENSMUSG00000020399	HAVCR2	2.585	4.28429e-40
ENSMUSG00000020401	FAM71B	-1.76	8.7875e-09
ENSMUSG00000020407	UPP1	-1.941	0.00300342
ENSMUSG00000020415	PTTG1	-1.55	0.00886714
ENSMUSG00000020419	HORMAD2	-4.488	6.08518e-06
ENSMUSG00000020422	TNS3	-1.526	1.60803e-17
ENSMUSG00000020423	BTG2	-1.219	1.57484e-07
ENSMUSG00000020424	CASTOR1	1.992	1.91619e-41
ENSMUSG00000020427	IGFBP3	-5.359	0.000203156
ENSMUSG00000020430	PES1	1.184	3.67737e-19
ENSMUSG00000020439	SMTN	-2.846	5.34797e-05
ENSMUSG00000020453	PATZ1	1.024	1.91903e-21
ENSMUSG00000020457	DRG1	1.228	1.41994e-40
ENSMUSG00000020467	EFEMP1	-4.198	0.000896834
ENSMUSG00000020471	POLD2	1.638	3.21035e-24
ENSMUSG00000020486	2019-09-04	-1.272	7.72258e-06
ENSMUSG00000020490	BTNL10	-2.226	0.0193138
ENSMUSG00000020492	SKA2	1.464	2.32861e-31
ENSMUSG00000020493	PRR11	3.6	6.94918e-30
ENSMUSG00000020514	MRPL22	1.195	6.76239e-25
ENSMUSG00000020526	ZNHIT3	1.109	5.75618e-11
ENSMUSG00000020534	SHMT1	2.074	3.46428e-45
ENSMUSG00000020538	SREBF1	1.759	2.45762e-37
ENSMUSG00000020541	TOM1L1	3.022	4.34886e-10
ENSMUSG00000020547	BZW2	3.13	1.25661e-135
ENSMUSG00000020549	ELAC2	1.08	1.03112e-13
ENSMUSG00000020577	TSPAN13	1.624	8.90085e-43
ENSMUSG00000020592	SDC1	-2.943	1.50157e-10
ENSMUSG00000020593	LPIN1	2.706	2.08334e-126
ENSMUSG00000020599	RGS9	-3.027	6.68174e-05
ENSMUSG00000020607	FAM84A	-3.375	6.48241e-05
ENSMUSG00000020614	FAM20A	1.649	6.05229e-07
ENSMUSG00000020620	ABCA8B	-2.815	2.8102e-12
ENSMUSG00000020628	TRAPPC12	1.104	9.71253e-31
ENSMUSG00000020629	ADI1	1.16	1.70584e-15
ENSMUSG00000020635	FKBP1B	1.328	1.0824e-06
ENSMUSG00000020642	RNF144A	-1.019	7.60527e-08
ENSMUSG00000020644	ID2	1.242	2.3112e-13
ENSMUSG00000020647	NCOA1	-1.138	4.52328e-06
ENSMUSG00000020649	RRM2	3.447	3.32807e-21
ENSMUSG00000020650	BCAP29	1.558	3.42644e-29
ENSMUSG00000020651	SLC26A4	-3.633	0.00376991
ENSMUSG00000020653	KLF11	2.383	5.55569e-44
ENSMUSG00000020654	ADCY3	-1.302	3.2065e-12
ENSMUSG00000020658	EFR3B	1.896	0.00336216
ENSMUSG00000020664	DLD	1.046	1.67799e-19
ENSMUSG00000020668	KIF3C	-1.456	3.66251e-05
ENSMUSG00000020669	SH3YL1	-2.956	0.000111471
ENSMUSG00000020674	PXDN	-3.034	0.0285785
ENSMUSG00000020681	ACE	-1.521	1.96795e-06
ENSMUSG00000020682	MMP28	2.098	2.3347e-19
ENSMUSG00000020689	ITGB3	-2.089	0.00550744
ENSMUSG00000020697	LIG3	1.282	8.88235e-25
ENSMUSG00000020708	PSMC5	1.333	1.27349e-45
ENSMUSG00000020713	GH	-2.346	4.66826e-07
ENSMUSG00000020717	PECAM1	-2.448	2.90168e-07
ENSMUSG00000020718	POLG2	-1.206	1.38541e-07
ENSMUSG00000020720	PSMD12	1.211	1.88902e-29
ENSMUSG00000020728	CEP112	-3.531	2.80986e-05
ENSMUSG00000020732	RAB37	1.121	0.000491377
ENSMUSG00000020733	SLC9A3R1	1.281	9.71565e-21
ENSMUSG00000020736	NT5C	1.176	1.65118e-22
ENSMUSG00000020737	JPT1	1.047	2.33045e-12
ENSMUSG00000020739	NUP85	1.592	3.15015e-37
ENSMUSG00000020741	CLUH	1.138	2.28141e-20
ENSMUSG00000020758	ITGB4	-2.438	0.000998105
ENSMUSG00000020766	GALK1	1.972	3.11306e-67
ENSMUSG00000020773	TRIM47	5.747	1.04527e-116
ENSMUSG00000020774	ASPA	-2.619	0.00501444
ENSMUSG00000020780	SRP68	1.064	1.17148e-14
ENSMUSG00000020787	P2RX1	-1.877	0.0135971
ENSMUSG00000020788	ATP2A3	-1.575	0.00304467
ENSMUSG00000020798	SPNS3	-1.408	2.25651e-10
ENSMUSG00000020802	UBE2O	-2.487	0.00989036
ENSMUSG00000020806	RHBDF2	-1.861	2.5911e-26
ENSMUSG00000020808	PIMREG	5.908	7.31843e-53
ENSMUSG00000020826	NOS2	-2.528	0.0176606
ENSMUSG00000020828	PLD2	-1.268	5.46698e-05
ENSMUSG00000020829	SLC46A1	-1.327	0.00317847
ENSMUSG00000020831	0610010K14RIK	-1.011	0.0087367
ENSMUSG00000020832	ERAL1	1.051	1.66317e-16
ENSMUSG00000020834	DHRS13	2.237	7.54125e-32
ENSMUSG00000020836	CORO6	-2.767	8.97371e-05
ENSMUSG00000020838	SLC6A4	-2.403	0.00161818
ENSMUSG00000020840	BLMH	1.883	3.24453e-98
ENSMUSG00000020841	CPD	3.422	3.5994e-42
ENSMUSG00000020846	RFLNB	-1.085	2.07757e-05
ENSMUSG00000020847	RPH3AL	-1.293	0.000861273
ENSMUSG00000020866	CACNA1G	-2.741	0.00774604
ENSMUSG00000020868	XYLT2	-1.003	3.08913e-11
ENSMUSG00000020869	LRRC59	1.363	4.56005e-36
ENSMUSG00000020882	CACNB1	-1.156	4.989e-09
ENSMUSG00000020886	DLG4	-1.35	0.00926651
ENSMUSG00000020889	NR1D1	-1.641	0.000951293
ENSMUSG00000020892	ALOXE3	-3.234	7.42227e-05
ENSMUSG00000020893	PER1	1.054	2.24444e-06
ENSMUSG00000020895	TMEM107	3.584	2.10552e-106
ENSMUSG00000020897	AURKB	3.13	4.03291e-128
ENSMUSG00000020900	MYH10	4.331	3.32074e-24
ENSMUSG00000020901	PIK3R5	-1.351	1.44828e-08
ENSMUSG00000020902	NTN1	-1.953	0.00887029
ENSMUSG00000020905	USP43	-4.361	9.62212e-05
ENSMUSG00000020911	KRT19	-3.478	0.000157101
ENSMUSG00000020914	TOP2A	3.551	9.60976e-22
ENSMUSG00000020921	TMEM101	1.625	1.93687e-52
ENSMUSG00000020922	LSM12	-3.432	5.08009e-05
ENSMUSG00000020925	CCDC43	1.635	2.34927e-39
ENSMUSG00000020929	EFTUD2	1.194	5.94984e-19
ENSMUSG00000020932	GFAP	1.558	0.0261756
ENSMUSG00000020937	PLCD3	-1.748	0.00277317
ENSMUSG00000020940	1700023F06RIK	-2.486	0.00559555
ENSMUSG00000020941	MAP3K14	-1.637	2.24446e-16
ENSMUSG00000020954	STRN3	-1.096	0.00854305
ENSMUSG00000020961	STON2	-2.86	6.33465e-05
ENSMUSG00000020974	POLE2	2.26	1.66593e-98
ENSMUSG00000020978	KLHDC2	1.163	2.4684e-25
ENSMUSG00000020988	L2HGDH	1.439	1.89554e-27
ENSMUSG00000020990	CDKL1	-2.988	2.04338e-06
ENSMUSG00000021018	POLR2H	1.433	1.62975e-29
ENSMUSG00000021023	1110008L16RIK	1.218	4.07259e-22
ENSMUSG00000021024	PSMA6	1.112	9.04515e-29
ENSMUSG00000021025	NFKBIA	-1.272	2.6308e-05
ENSMUSG00000021040	SLIRP	1.07	1.18052e-16
ENSMUSG00000021048	MTHFD1	3.258	1.18746e-301
ENSMUSG00000021054	SGPP1	1.146	8.78654e-23
ENSMUSG00000021056	TEX21	8.122	2.22993e-61
ENSMUSG00000021057	AKAP5	-1.197	0.00689569
ENSMUSG00000021072	TMX1	1.024	3.90013e-05
ENSMUSG00000021079	TIMM9	1.225	6.52267e-18
ENSMUSG00000021087	RTN1	-1.872	1.57518e-11
ENSMUSG00000021108	PRKCH	-1.162	4.59566e-10
ENSMUSG00000021112	MPP5	-1.164	0.0206939
ENSMUSG00000021115	VRK1	1.446	1.60462e-44
ENSMUSG00000021116	EIF2S1	1.899	8.85842e-96
ENSMUSG00000021118	PLEK2	7.473	1.75726e-45
ENSMUSG00000021123	RDH12	-1.936	9.57731e-12
ENSMUSG00000021125	ARG2	-2.57	2.85285e-05
ENSMUSG00000021136	SMOC1	-1.336	0.00476285
ENSMUSG00000021144	MTA1	1.295	1.84805e-32
ENSMUSG00000021171	ESYT2	1.8	9.13335e-71
ENSMUSG00000021175	CDCA7L	2.257	8.27476e-68
ENSMUSG00000021178	PSMC1	1.289	9.42012e-31
ENSMUSG00000021193	PITRM1	2.037	3.81327e-31
ENSMUSG00000021196	PFKP	2.035	9.00199e-73
ENSMUSG00000021203	OTUB2	4.439	3.45518e-177
ENSMUSG00000021208	IFI27L2B	6.085	7.82226e-09
ENSMUSG00000021213	AKR1C13	1.402	1.72354e-12
ENSMUSG00000021215	NET1	1.645	1.169e-23
ENSMUSG00000021217	TSHZ3	1.362	0.000156945
ENSMUSG00000021219	RGS6	-2.435	0.0074041
ENSMUSG00000021221	DPF3	2.944	7.70031e-10
ENSMUSG00000021222	DCAF4	1.007	3.46512e-23
ENSMUSG00000021243	FCF1	1.207	5.65652e-19
ENSMUSG00000021250	FOS	-1.298	0.00373168
ENSMUSG00000021252	ERG28	1.23	8.18833e-21
ENSMUSG00000021253	TGFB3	-1.966	9.14355e-13
ENSMUSG00000021257	ANGEL1	-1.536	5.81318e-19
ENSMUSG00000021262	EVL	-1.61	7.6248e-17
ENSMUSG00000021263	DEGS2	-1.902	1.20231e-11
ENSMUSG00000021265	SLC25A29	-1.69	3.4866e-13
ENSMUSG00000021273	FDFT1	2.031	7.02357e-45
ENSMUSG00000021278	AMN	-1.961	0.000188719
ENSMUSG00000021279	CDC42BPB	-1.421	0.000524227
ENSMUSG00000021282	EIF5	-1.33	0.0215658
ENSMUSG00000021286	ZFYVE21	1.033	3.94951e-11
ENSMUSG00000021287	XRCC3	1.506	1.12816e-14
ENSMUSG00000021298	GPR132	-1.419	1.30925e-10
ENSMUSG00000021313	RYR2	-2.229	1.39039e-14
ENSMUSG00000021319	SFRP4	6.989	1.1072e-30
ENSMUSG00000021322	AOAH	-1.199	0.000275283
ENSMUSG00000021336	SLC17A4	4.9	9.82016e-36
ENSMUSG00000021340	GPLD1	1.519	0.00026682
ENSMUSG00000021356	IRF4	-1.527	1.05194e-09
ENSMUSG00000021359	TFAP2A	-3.063	0.000219483
ENSMUSG00000021361	TMEM14C	2.046	1.50547e-38
ENSMUSG00000021362	GCM2	3.364	1.79338e-47
ENSMUSG00000021365	NEDD9	-1.288	1.50496e-09
ENSMUSG00000021368	TBC1D7	1.06	4.78146e-14
ENSMUSG00000021375	KIF13A	1.078	7.73292e-06
ENSMUSG00000021377	DEK	1.02	6.00632e-21
ENSMUSG00000021384	SUSD3	-1.796	1.51806e-33
ENSMUSG00000021391	CENPP	3.034	2.05435e-36
ENSMUSG00000021400	WRNIP1	1.433	4.73401e-31
ENSMUSG00000021403	SERPINB9B	-1.524	0.00116799
ENSMUSG00000021411	PXDC1	-2.321	1.82016e-28
ENSMUSG00000021423	LY86	-1.007	2.24191e-05
ENSMUSG00000021457	SYK	-2.031	5.90063e-23
ENSMUSG00000021460	AUH	-1.042	0.00103969
ENSMUSG00000021466	PTCH1	1.119	2.68966e-13
ENSMUSG00000021476	HABP4	-1.2	3.61973e-16
ENSMUSG00000021485	MXD3	3.691	5.86674e-48
ENSMUSG00000021492	F12	-3.895	6.26683e-18
ENSMUSG00000021493	PDLIM7	-1.92	0.000924961
ENSMUSG00000021509	SLC25A48	-3.353	6.06193e-05
ENSMUSG00000021518	PTDSS1	1.174	2.54942e-17
ENSMUSG00000021520	UQCRB	1.334	4.34538e-25
ENSMUSG00000021537	CETN3	1.249	1.13132e-28
ENSMUSG00000021540	SMAD5	1.11	6.71508e-41
ENSMUSG00000021548	CCNH	1.003	5.8587e-19
ENSMUSG00000021550	2210016F16RIK	1.236	2.45206e-21
ENSMUSG00000021552	GKAP1	3.537	4.79779e-92
ENSMUSG00000021553	SLC28A3	-3.6	3.65337e-05
ENSMUSG00000021556	GOLM1	1.078	2.75088e-12
ENSMUSG00000021569	TRIP13	2.849	4.21747e-83
ENSMUSG00000021573	TPPP	2.511	5.87551e-28
ENSMUSG00000021595	NSUN2	1.437	2.86296e-44
ENSMUSG00000021596	MCTP1	-3.98	5.32619e-06
ENSMUSG00000021606	NDUFS6	1.101	3.83721e-16
ENSMUSG00000021607	MRPL36	1.331	1.21887e-27
ENSMUSG00000021611	TERT	-1.891	8.36651e-15
ENSMUSG00000021624	CD180	-1.713	2.26096e-17
ENSMUSG00000021636	MARVELD2	-1.753	3.10507e-13
ENSMUSG00000021638	OCLN	-3.224	6.4998e-05
ENSMUSG00000021640	NAIP1	-2.985	0.000134455
ENSMUSG00000021643	SERF1	3.053	1.31283e-51
ENSMUSG00000021660	BTF3	1.071	1.52592e-27
ENSMUSG00000021662	ARHGEF28	-2.69	0.0012022
ENSMUSG00000021670	HMGCR	1.471	1.16301e-66
ENSMUSG00000021675	F2RL2	-2.421	0.0024787
ENSMUSG00000021676	IQGAP2	1.34	1.54496e-22
ENSMUSG00000021687	SCAMP1	-1.607	0.0274711
ENSMUSG00000021690	JMY	1.091	6.03778e-38
ENSMUSG00000021693	KIF2A	-2.586	0.000424737
ENSMUSG00000021701	PLK2	-2.973	2.59226e-07
ENSMUSG00000021703	SERINC5	-1.912	5.51481e-21
ENSMUSG00000021704	MTX3	-1.233	2.47673e-12
ENSMUSG00000021707	DHFR	2.502	3.12184e-89
ENSMUSG00000021708	RASGRF2	-2.438	2.74743e-08
ENSMUSG00000021711	TRAPPC13	1.02	1.7252e-30
ENSMUSG00000021719	RGS7BP	5.574	5.47616e-45
ENSMUSG00000021725	PARP8	-1.75	1.44173e-15
ENSMUSG00000021731	MRPS30	1.141	2.41704e-18
ENSMUSG00000021733	SLC4A7	-1.354	7.95453e-15
ENSMUSG00000021737	PSMD6	1.182	3.35323e-38
ENSMUSG00000021745	PTPRG	-2.643	0.00414222
ENSMUSG00000021749	OIT1	-4.269	0.000462458
ENSMUSG00000021751	ACOX2	-3.222	0.0485494
ENSMUSG00000021758	DDX4	2.602	2.6954e-19
ENSMUSG00000021759	PLPP1	2.021	7.92147e-05
ENSMUSG00000021760	GPX8	-1.915	0.00188953
ENSMUSG00000021771	VDAC2	1.491	1.76692e-72
ENSMUSG00000021773	COMTD1	1.102	4.7638e-11
ENSMUSG00000021775	NR1D2	-1.258	1.87735e-20
ENSMUSG00000021779	THRB	-2.05	2.2524e-05
ENSMUSG00000021782	DLG5	-2.63	8.55948e-08
ENSMUSG00000021785	NGLY1	1.247	1.05362e-21
ENSMUSG00000021794	GLUD1	1.119	4.02565e-13
ENSMUSG00000021795	SFTPD	-3.881	0.0102817
ENSMUSG00000021796	BMPR1A	-1.466	5.7692e-05
ENSMUSG00000021798	LDB3	-3.596	0.00147954
ENSMUSG00000021806	NID2	-1.137	2.26347e-05
ENSMUSG00000021815	MSS51	-1.027	4.18847e-08
ENSMUSG00000021830	TXNDC16	-2.259	1.48428e-21
ENSMUSG00000021831	ERO1L	2.737	1.23156e-64
ENSMUSG00000021832	PSMC6	1.309	3.33947e-48
ENSMUSG00000021835	BMP4	6.483	4.29322e-50
ENSMUSG00000021838	SAMD4	-2.496	0.00745286
ENSMUSG00000021846	PELI2	-1.099	0.00195883
ENSMUSG00000021884	HACL1	1.281	5.72653e-32
ENSMUSG00000021890	EAF1	1.332	2.89564e-25
ENSMUSG00000021892	SH3BP5	-1.81	2.69448e-22
ENSMUSG00000021895	ARHGEF3	-1.158	1.00536e-09
ENSMUSG00000021904	SEMA3G	-2.29	1.72659e-08
ENSMUSG00000021916	GLT8D1	1.007	2.36332e-18
ENSMUSG00000021929	KPNA3	1.153	1.31051e-19
ENSMUSG00000021932	RNASEH2B	1.93	6.75419e-84
ENSMUSG00000021947	CRYL1	1.374	2.92746e-25
ENSMUSG00000021950	ANXA8	-4.333	0.000104254
ENSMUSG00000021957	TKT	2.173	1.54785e-66
ENSMUSG00000021965	SKA3	4.035	1.01063e-62
ENSMUSG00000021967	MRPL57	1.57	7.8664e-43
ENSMUSG00000021978	EXTL3	1.142	1.27932e-26
ENSMUSG00000021986	AMER2	-3.039	1.62523e-07
ENSMUSG00000021996	ESD	-2.008	0.00311071
ENSMUSG00000022010	TSC22D1	-4.097	2.19199e-05
ENSMUSG00000022012	ENOX1	-3.765	0.000170863
ENSMUSG00000022014	EPSTI1	-1.126	5.80149e-10
ENSMUSG00000022016	AKAP11	-1.551	1.26274e-18
ENSMUSG00000022019	TDRD3	1.26	6.82659e-10
ENSMUSG00000022026	OLFM4	-2.84	0.000403332
ENSMUSG00000022033	PBK	6.772	1.62605e-69
ENSMUSG00000022034	ESCO2	1.404	0.0463387
ENSMUSG00000022037	CLU	-2.97	0.000535662
ENSMUSG00000022048	DPYSL2	1.382	1.65971e-37
ENSMUSG00000022051	BNIP3L	-2.489	0.00587295
ENSMUSG00000022057	ADAMDEC1	2.096	9.68905e-08
ENSMUSG00000022070	BORA	2.497	1.10986e-120
ENSMUSG00000022085	PEBP4	-3.872	0.00140582
ENSMUSG00000022090	PDLIM2	-1.714	5.69833e-17
ENSMUSG00000022091	SORBS3	-2.136	1.86947e-12
ENSMUSG00000022092	PPP3CC	-1.521	6.86263e-17
ENSMUSG00000022098	BMP1	3.999	3.84199e-17
ENSMUSG00000022099	DMTN	2.134	0.000885202
ENSMUSG00000022103	GFRA2	7.223	8.07328e-73
ENSMUSG00000022114	SPRY2	1.294	5.70715e-10
ENSMUSG00000022122	EDNRB	4.697	1.43065e-11
ENSMUSG00000022123	SCEL	-3.035	8.25195e-05
ENSMUSG00000022126	ACOD1	-4.023	0.00149795
ENSMUSG00000022132	CLDN10	-1.864	8.42681e-11
ENSMUSG00000022139	MBNL2	-1.65	0.00082937
ENSMUSG00000022142	NUP155	1.131	1.86111e-26
ENSMUSG00000022146	OSMR	-3.326	0.000200921
ENSMUSG00000022150	DAB2	2.614	2.55866e-10
ENSMUSG00000022157	MCPT8	2.164	1.23083e-07
ENSMUSG00000022176	REM2	2.994	2.51835e-10
ENSMUSG00000022177	HAUS4	1.73	3.74143e-67
ENSMUSG00000022180	SLC7A8	7.009	5.80376e-258
ENSMUSG00000022191	DROSHA	1.351	2.29506e-68
ENSMUSG00000022195	6030458C11RIK	1.298	1.80104e-34
ENSMUSG00000022197	PDZD2	2.709	2.18125e-37
ENSMUSG00000022199	SLC22A17	-1.527	1.03636e-06
ENSMUSG00000022201	ZFR	-1.271	0.00773635
ENSMUSG00000022203	EFS	-4.118	0.00354158
ENSMUSG00000022210	DHRS4	1.049	8.1259e-26
ENSMUSG00000022211	CARMIL3	-1.381	1.54515e-08
ENSMUSG00000022217	EMC9	1.509	2.01562e-27
ENSMUSG00000022221	RIPK3	1.068	6.55658e-12
ENSMUSG00000022225	CMA1	5.805	5.10426e-78
ENSMUSG00000022226	MCPT2	9.936	1.08845e-61
ENSMUSG00000022227	MCPT1	11.182	2.16559e-36
ENSMUSG00000022234	CCT5	1.515	1.50067e-27
ENSMUSG00000022237	ANKRD33B	2.13	1.07489e-11
ENSMUSG00000022241	TARS	1.548	3.08818e-34
ENSMUSG00000022244	AMACR	-1.108	4.73536e-08
ENSMUSG00000022246	RAI14	1.062	0.0116715
ENSMUSG00000022257	LAPTM4B	-1.377	8.81316e-05
ENSMUSG00000022261	SDC2	-2.992	0.00241943
ENSMUSG00000022270	RETREG1	-1.814	5.35355e-27
ENSMUSG00000022272	MYO10	-1.885	7.36282e-06
ENSMUSG00000022283	PABPC1	-1.882	0.0230359
ENSMUSG00000022286	GRHL2	3.389	3.78466e-05
ENSMUSG00000022299	SLC25A32	1.209	8.05697e-18
ENSMUSG00000022300	DCAF13	1.124	3.17897e-23
ENSMUSG00000022303	DCSTAMP	-2.818	0.00338255
ENSMUSG00000022304	DPYS	-4.776	5.96874e-06
ENSMUSG00000022305	LRP12	3.781	3.14961e-89
ENSMUSG00000022309	ANGPT1	-3.488	9.5058e-05
ENSMUSG00000022314	RAD21	1.485	1.75604e-56
ENSMUSG00000022322	SHCBP1	4.401	3.79631e-30
ENSMUSG00000022323	RIDA	-2.811	0.000444875
ENSMUSG00000022325	POP1	1.652	9.03697e-28
ENSMUSG00000022332	KHDRBS3	-3.463	3.84758e-05
ENSMUSG00000022336	EIF3E	1.107	7.17311e-14
ENSMUSG00000022337	EMC2	1.635	2.89967e-27
ENSMUSG00000022338	ENY2	1.319	3.59029e-26
ENSMUSG00000022346	MYC	2.7	3.50536e-103
ENSMUSG00000022351	SQLE	2.445	1.81463e-30
ENSMUSG00000022358	FBXO32	-1.862	1.46765e-30
ENSMUSG00000022359	WDYHV1	1.02	1.02879e-13
ENSMUSG00000022360	ATAD2	1.703	1.91519e-60
ENSMUSG00000022364	TBC1D31	1.315	3.26432e-10
ENSMUSG00000022367	HAS2	-5.059	0.00311536
ENSMUSG00000022370	MRPL13	1.101	1.41201e-24
ENSMUSG00000022382	WNT7B	-4.025	0.000373242
ENSMUSG00000022383	PPARA	-2.671	0.0169173
ENSMUSG00000022385	GTSE1	3.449	5.56275e-102
ENSMUSG00000022403	ST13	1.187	1.64691e-23
ENSMUSG00000022404	SLC25A17	1.079	8.15836e-37
ENSMUSG00000022407	ADSL	1.063	8.43452e-18
ENSMUSG00000022414	TAB1	1.433	2.67781e-23
ENSMUSG00000022415	SYNGR1	3.153	5.50246e-08
ENSMUSG00000022416	CACNA1I	-2.777	1.09618e-22
ENSMUSG00000022419	DEPTOR	1.123	1.17005e-09
ENSMUSG00000022422	DSCC1	2.67	9.63644e-65
ENSMUSG00000022434	FAM118A	-1.035	6.77696e-07
ENSMUSG00000022438	PARVB	-2.403	0.00220273
ENSMUSG00000022439	PARVG	1.272	2.72559e-16
ENSMUSG00000022441	EFCAB6	-2.638	0.0021527
ENSMUSG00000022442	TTLL1	-1.839	0.00106875
ENSMUSG00000022443	MYH9	-1.601	0.000459263
ENSMUSG00000022450	NDUFA6	1.219	3.46116e-35
ENSMUSG00000022451	TWF1	-2.107	0.000514808
ENSMUSG00000022453	NAGA	1.29	4.67466e-19
ENSMUSG00000022456	2019-09-03	1.567	1.85652e-06
ENSMUSG00000022468	ENDOU	-2.41	3.3962e-09
ENSMUSG00000022471	XRCC6	1.197	3.55378e-44
ENSMUSG00000022474	PMM1	2.254	4.21003e-32
ENSMUSG00000022476	POLR3H	1.131	1.96113e-14
ENSMUSG00000022477	ACO2	1.467	1.88135e-54
ENSMUSG00000022479	VDR	-1.072	0.014288
ENSMUSG00000022485	HOXC5	7.673	7.02309e-18
ENSMUSG00000022489	PDE1B	-1.158	5.56812e-08
ENSMUSG00000022500	LITAF	-3.461	1.53286e-05
ENSMUSG00000022504	CIITA	-1.873	1.69184e-13
ENSMUSG00000022505	EMP2	-3.863	2.39632e-05
ENSMUSG00000022508	BCL6	-1.747	2.75563e-12
ENSMUSG00000022510	TRP63	-4.233	0.0206676
ENSMUSG00000022512	CLDN1	-2.96	2.17206e-05
ENSMUSG00000022517	MGRN1	-1.519	3.18593e-26
ENSMUSG00000022526	ZFP251	1.03	1.90567e-13
ENSMUSG00000022528	HES1	-1.564	1.78606e-15
ENSMUSG00000022533	ATP13A3	2.152	2.03172e-107
ENSMUSG00000022534	MEFV	-1.238	0.00492443
ENSMUSG00000022537	TMEM44	5.875	5.31438e-62
ENSMUSG00000022540	ROGDI	-1.978	3.51869e-28
ENSMUSG00000022543	4930451G09RIK	-1.931	5.66466e-11
ENSMUSG00000022550	ADCK5	2.283	1.10852e-71
ENSMUSG00000022551	CYC1	1.268	1.69991e-28
ENSMUSG00000022555	DGAT1	-1.304	6.28542e-05
ENSMUSG00000022558	MROH1	1.311	1.90429e-22
ENSMUSG00000022561	GPAA1	1.362	1.76278e-38
ENSMUSG00000022562	OPLAH	1.651	4.79281e-13
ENSMUSG00000022564	GRINA	-1.512	0.0123519
ENSMUSG00000022565	PLEC	1.352	1.70732e-17
ENSMUSG00000022570	TSTA3	1.325	2.04829e-32
ENSMUSG00000022571	PYCRL	1.188	2.19571e-16
ENSMUSG00000022574	NAPRT	2.753	7.49635e-89
ENSMUSG00000022586	LY6I	-2.75	1.03822e-11
ENSMUSG00000022594	LYNX1	-2.689	8.86697e-19
ENSMUSG00000022598	PSCA	-3.385	0.000335747
ENSMUSG00000022602	ARC	-2.085	4.97562e-07
ENSMUSG00000022610	MAPK12	-2.341	1.00941e-16
ENSMUSG00000022614	LMF2	1.047	3.26576e-19
ENSMUSG00000022621	RABL2	1.045	1.38132e-05
ENSMUSG00000022623	SHANK3	5.412	1.00878e-40
ENSMUSG00000022629	KIF21A	-4.536	0.000290212
ENSMUSG00000022634	YAF2	-1.712	0.00476902
ENSMUSG00000022636	ALCAM	-2.188	4.36776e-19
ENSMUSG00000022659	GCSAM	-1.87	0.0187068
ENSMUSG00000022661	CD200	-2.37	6.99732e-24
ENSMUSG00000022667	CD200R1	1.725	1.04909e-12
ENSMUSG00000022668	GTPBP8	1.038	4.1926e-12
ENSMUSG00000022671	MZT2	1.757	1.56891e-33
ENSMUSG00000022673	MCM4	1.89	5.39844e-73
ENSMUSG00000022683	PLA2G10	-2.9	0.000901235
ENSMUSG00000022686	B3GNT5	-2.709	1.37325e-24
ENSMUSG00000022687	BOC	-3.198	0.000615178
ENSMUSG00000022696	SIDT1	-1.279	1.45449e-09
ENSMUSG00000022698	NAA50	1.462	1.51954e-38
ENSMUSG00000022706	MRPL40	1.398	5.39378e-36
ENSMUSG00000022707	GBE1	-1.521	8.94591e-06
ENSMUSG00000022708	ZBTB20	-1.193	1.4058e-11
ENSMUSG00000022722	ARL6	2.073	4.84852e-20
ENSMUSG00000022723	CRYBG3	-2.011	2.43952e-29
ENSMUSG00000022742	CPOX	2.899	7.8581e-28
ENSMUSG00000022747	ST3GAL6	-1.213	1.00663e-11
ENSMUSG00000022748	CMSS1	1.859	2.08995e-29
ENSMUSG00000022750	KLHL22	3.353	7.86252e-174
ENSMUSG00000022751	NIT2	1.307	7.17961e-15
ENSMUSG00000022752	TOMM70A	1.521	6.3601e-44
ENSMUSG00000022755	ADGRG7	2.781	1.36483e-15
ENSMUSG00000022756	SLC7A4	5.2	1.84966e-52
ENSMUSG00000022757	TFG	1.154	2.0883e-27
ENSMUSG00000022762	NCAM2	-2.095	0.00930773
ENSMUSG00000022773	YPEL1	-1.127	2.17886e-06
ENSMUSG00000022780	MELTF	-1.807	0.00599718
ENSMUSG00000022788	FGD4	-1.53	1.89428e-06
ENSMUSG00000022790	IGSF11	8.344	5.87251e-31
ENSMUSG00000022814	UMPS	1.367	7.33892e-17
ENSMUSG00000022817	ITGB5	-3.548	9.24936e-06
ENSMUSG00000022818	CYP2AB1	-1.367	5.55579e-06
ENSMUSG00000022820	NDUFB4	1.683	6.11354e-28
ENSMUSG00000022824	MUC13	1.489	0.00669246
ENSMUSG00000022833	CCDC14	2.238	8.33835e-66
ENSMUSG00000022836	MYLK	-2.754	0.000506171
ENSMUSG00000022837	IQCB1	-1.059	1.00824e-07
ENSMUSG00000022838	EAF2	-1.703	3.66212e-10
ENSMUSG00000022840	ADCY5	-2.495	0.00163217
ENSMUSG00000022842	ECE2	1.507	1.7586e-27
ENSMUSG00000022843	CLCN2	1.464	2.63613e-23
ENSMUSG00000022844	PDIA5	-1.507	0.00138405
ENSMUSG00000022861	DGKG	-2.098	3.23704e-08
ENSMUSG00000022864	D16ERTD472E	1.317	7.51948e-31
ENSMUSG00000022865	CXADR	-2.941	3.51474e-06
ENSMUSG00000022876	SAMSN1	2.151	1.2257e-28
ENSMUSG00000022881	RFC4	2.554	9.87872e-88
ENSMUSG00000022885	ST6GAL1	-1.436	1.3646e-08
ENSMUSG00000022890	ATP5J	1.023	1.08457e-19
ENSMUSG00000022895	ETS2	-1.196	0.00548475
ENSMUSG00000022899	SLC15A2	-1.002	0.0340304
ENSMUSG00000022900	ILDR1	-2.008	6.02849e-06
ENSMUSG00000022901	CD86	-1.249	1.15901e-07
ENSMUSG00000022902	STFA2	1.706	0.0408382
ENSMUSG00000022912	PROS1	-1.904	0.00951689
ENSMUSG00000022913	PSMG1	1.683	3.42015e-32
ENSMUSG00000022914	BRWD1	-1.317	1.30774e-11
ENSMUSG00000022915	NA	-1.575	0.000109526
ENSMUSG00000022938	FAM3B	1.651	0.000556179
ENSMUSG00000022945	CHAF1B	4.104	4.55722e-232
ENSMUSG00000022948	SETD4	-1.131	2.99639e-09
ENSMUSG00000022949	CLIC6	-4.029	0.0016906
ENSMUSG00000022952	RUNX1	1.584	1.49198e-55
ENSMUSG00000022956	ATP5O	1.468	1.53921e-55
ENSMUSG00000022957	ITSN1	-1.994	0.00191788
ENSMUSG00000022962	GART	1.402	9.50776e-25
ENSMUSG00000022964	TMEM50B	-1.605	6.8474e-11
ENSMUSG00000022972	CFAP298	1.405	2.4241e-23
ENSMUSG00000022986	KRT75	-2.542	0.00620937
ENSMUSG00000022994	ADCY6	2.616	7.11526e-10
ENSMUSG00000022995	ENAH	1.508	0.0196991
ENSMUSG00000022996	WNT10B	-1.563	4.31873e-05
ENSMUSG00000022999	LMBR1L	-1.446	3.36491e-25
ENSMUSG00000023004	TUBA1B	3.038	8.8695e-181
ENSMUSG00000023007	PRPF40B	-1.338	8.15377e-11
ENSMUSG00000023008	FMNL3	-1.62	6.56422e-29
ENSMUSG00000023009	NCKAP5L	-1.451	6.88169e-11
ENSMUSG00000023015	RACGAP1	2.163	7.51202e-99
ENSMUSG00000023019	GPD1	-1.268	0.000736645
ENSMUSG00000023030	SLC11A2	1.524	1.37324e-21
ENSMUSG00000023031	CELA1	-3.411	0.00019506
ENSMUSG00000023032	SLC4A8	-1.657	1.28741e-17
ENSMUSG00000023033	SCN8A	-4.133	3.09168e-15
ENSMUSG00000023034	NR4A1	-1.182	0.00033253
ENSMUSG00000023039	KRT7	-3.341	6.57121e-05
ENSMUSG00000023041	KRT6B	-3.491	0.000124693
ENSMUSG00000023043	KRT18	-2.098	0.0364714
ENSMUSG00000023044	CSAD	-1.312	1.29722e-17
ENSMUSG00000023045	SOAT2	1.212	0.000348996
ENSMUSG00000023046	IGFBP6	-1.317	0.0374139
ENSMUSG00000023047	AMHR2	-1.225	0.000869829
ENSMUSG00000023052	NPFF	-1.323	9.27344e-09
ENSMUSG00000023067	CDKN1A	2.36	2.69148e-11
ENSMUSG00000023079	GTF2IRD1	-1.081	0.000426368
ENSMUSG00000023084	LRRC71	-2.331	3.08417e-09
ENSMUSG00000023089	NDUFA5	1.288	1.01212e-19
ENSMUSG00000023092	FHL1	-4.044	7.64512e-06
ENSMUSG00000023094	MSRB2	-1.65	9.88279e-11
ENSMUSG00000023104	RFC2	2.057	2.59994e-75
ENSMUSG00000023110	PRMT5	1.228	2.87815e-18
ENSMUSG00000023132	GZMA	-1.533	0.00013304
ENSMUSG00000023150	IVNS1ABP	1.39	3.35661e-24
ENSMUSG00000023169	SLC38A1	-1.399	6.85393e-11
ENSMUSG00000023186	VWA5A	1.443	5.51407e-16
ENSMUSG00000023206	IL15RA	-1.307	7.30775e-14
ENSMUSG00000023232	SERINC2	-3.461	0.00019411
ENSMUSG00000023243	KCNK5	1.526	7.75368e-17
ENSMUSG00000023247	GUCA2A	1.574	0.00246795
ENSMUSG00000023249	PARP3	-1.235	7.07434e-09
ENSMUSG00000023267	GABRR2	-1.544	1.92442e-06
ENSMUSG00000023328	ACHE	1.489	0.00448333
ENSMUSG00000023330	DTWD1	1.727	4.43278e-32
ENSMUSG00000023341	MX2	-2.339	5.1768e-15
ENSMUSG00000023345	POC1A	1.981	3.16752e-62
ENSMUSG00000023393	SLC17A9	1.286	7.62128e-22
ENSMUSG00000023467	TULP2	4.434	2.28506e-43
ENSMUSG00000023473	CELSR3	-1.809	1.97748e-05
ENSMUSG00000023495	PCBP4	1.328	1.86933e-21
ENSMUSG00000023505	CDCA3	3.097	5.16749e-21
ENSMUSG00000023571	C1QTNF12	5.545	1.34545e-218
ENSMUSG00000023572	CCNDBP1	-2.607	0.00293837
ENSMUSG00000023800	TIAM2	-1.222	6.65065e-08
ENSMUSG00000023805	SYNJ2	-1.113	4.97485e-17
ENSMUSG00000023806	RSPH3B	1.496	1.95256e-14
ENSMUSG00000023809	RPS6KA2	4.397	8.23843e-109
ENSMUSG00000023826	PRKN	-1.69	0.00904603
ENSMUSG00000023828	SLC22A3	5.03	5.81897e-32
ENSMUSG00000023830	IGF2R	-1.384	1.03931e-11
ENSMUSG00000023832	ACAT2	1.087	9.01194e-16
ENSMUSG00000023868	PDE10A	-2.441	0.00234456
ENSMUSG00000023873	1700010I14RIK	-1.765	1.56192e-17
ENSMUSG00000023883	PHF10	1.864	1.29225e-72
ENSMUSG00000023909	PAQR4	4.958	2.99597e-143
ENSMUSG00000023912	SLC25A27	-1.911	1.02228e-15
ENSMUSG00000023918	ADGRF4	-2.781	0.00369096
ENSMUSG00000023921	MUT	1.478	7.25961e-53
ENSMUSG00000023926	RHAG	1.489	0.0278824
ENSMUSG00000023927	SATB1	-1.721	4.07496e-13
ENSMUSG00000023940	SGO1	4.094	1.39396e-48
ENSMUSG00000023942	SLC29A1	3.53	4.76949e-146
ENSMUSG00000023944	HSP90AB1	1.299	7.31552e-14
ENSMUSG00000023951	VEGFA	1.255	0.00665892
ENSMUSG00000023953	POLH	1.35	1.54482e-38
ENSMUSG00000023959	CLIC5	-3.314	5.891e-05
ENSMUSG00000023960	ENPP5	3.582	9.16344e-22
ENSMUSG00000023961	ENPP4	4.171	3.72742e-193
ENSMUSG00000023963	CYP39A1	-1.176	2.56945e-07
ENSMUSG00000023966	RSPH9	1.589	9.74954e-05
ENSMUSG00000023968	CRIP3	-3.562	4.15829e-20
ENSMUSG00000023972	PTK7	-2.669	0.0161561
ENSMUSG00000023979	GUCA1B	-1.521	2.12512e-08
ENSMUSG00000023988	BYSL	1.174	1.00882e-33
ENSMUSG00000023990	TFEB	-1.489	1.56135e-15
ENSMUSG00000023992	TREM2	1.234	5.8652e-05
ENSMUSG00000023993	TREML1	-2.342	0.00324633
ENSMUSG00000024008	CPNE5	-2.815	1.79115e-21
ENSMUSG00000024011	PI16	-1.067	0.0046358
ENSMUSG00000024013	FGD2	-2.22	1.02127e-23
ENSMUSG00000024026	GLO1	2.182	4.19862e-15
ENSMUSG00000024032	TFF1	-3.99	0.0183083
ENSMUSG00000024038	NDUFV3	1.049	3.38156e-23
ENSMUSG00000024042	SIK1	-2.222	1.11499e-13
ENSMUSG00000024043	ARHGAP28	-2.891	0.00012445
ENSMUSG00000024049	MYOM1	-2.721	0.000739447
ENSMUSG00000024052	LPIN2	-1.049	0.0270255
ENSMUSG00000024056	NDC80	1.605	2.75439e-39
ENSMUSG00000024059	CLIP4	-4.489	4.86299e-05
ENSMUSG00000024063	LBH	-2.06	2.62349e-20
ENSMUSG00000024064	GALNT14	-3.668	6.0136e-12
ENSMUSG00000024065	EHD3	-1.181	6.30917e-09
ENSMUSG00000024066	XDH	-1.24	0.000132398
ENSMUSG00000024067	DPY30	1.405	2.71552e-27
ENSMUSG00000024072	YIPF4	-1.707	0.0273405
ENSMUSG00000024078	TTC27	1.286	5.71984e-42
ENSMUSG00000024095	HNRNPLL	1.013	1.93299e-06
ENSMUSG00000024098	TWSG1	1.957	4.06617e-41
ENSMUSG00000024099	NDUFV2	1.334	3.19283e-46
ENSMUSG00000024109	NRXN1	-2.225	6.35997e-08
ENSMUSG00000024112	CACNA1H	-3.248	8.1078e-25
ENSMUSG00000024120	LRPPRC	1.116	1.14375e-45
ENSMUSG00000024131	SLC3A1	-1.215	3.37063e-07
ENSMUSG00000024134	SIX2	-3.274	0.0382571
ENSMUSG00000024136	DNASE1L2	-1.275	1.55277e-07
ENSMUSG00000024140	EPAS1	-1.589	0.00265719
ENSMUSG00000024143	RHOQ	-1.634	1.04508e-16
ENSMUSG00000024158	HAGH	-1.939	0.0233507
ENSMUSG00000024165	JPT2	1.898	1.32763e-65
ENSMUSG00000024177	NME4	1.509	1.965e-11
ENSMUSG00000024186	RGS11	-1.032	0.00121108
ENSMUSG00000024190	DUSP1	-2.603	1.34808e-11
ENSMUSG00000024193	PHF1	-1.234	2.73158e-24
ENSMUSG00000024194	CUTA	1.55	8.6209e-60
ENSMUSG00000024206	RFX2	1.285	0.00103788
ENSMUSG00000024208	UQCC2	1.219	6.14054e-21
ENSMUSG00000024213	NUDT3	-2.416	0.000795229
ENSMUSG00000024215	SPDEF	-4.254	0.000182236
ENSMUSG00000024228	NUDT12	2.831	7.94322e-11
ENSMUSG00000024231	CUL2	1.136	6.98036e-17
ENSMUSG00000024232	BAMBI	1.031	5.37878e-06
ENSMUSG00000024235	MAP3K8	-1.722	2.50596e-17
ENSMUSG00000024242	MAP4K3	1.155	3.88577e-30
ENSMUSG00000024258	POLR2D	1.247	5.7307e-26
ENSMUSG00000024268	CELF4	-1.478	2.93621e-05
ENSMUSG00000024270	SLC39A6	-1.009	0.00411411
ENSMUSG00000024299	ADAMTS10	-1.484	1.51128e-22
ENSMUSG00000024300	MYO1F	-1.089	0.000111373
ENSMUSG00000024301	KIFC5B	1.503	1.67118e-22
ENSMUSG00000024302	DTNA	-4.611	3.99938e-05
ENSMUSG00000024309	PFDN6	1.024	3.01995e-26
ENSMUSG00000024330	COL11A2	-1.703	1.29112e-13
ENSMUSG00000024331	DSC2	-4.823	0.000112931
ENSMUSG00000024334	H2-OA	-1.074	8.03667e-06
ENSMUSG00000024340	BTNL2	-3.328	2.03637e-34
ENSMUSG00000024347	PSD2	-3.278	5.81136e-07
ENSMUSG00000024349	TMEM173	-1.322	1.48942e-10
ENSMUSG00000024352	SPATA24	1.164	5.61663e-09
ENSMUSG00000024353	MZB1	-1.535	1.27767e-09
ENSMUSG00000024354	SLC23A1	-1.738	0.000226499
ENSMUSG00000024357	SIL1	1.042	3.03874e-25
ENSMUSG00000024359	HSPA9	1.374	8.7114e-32
ENSMUSG00000024360	ETF1	1.147	2.57647e-21
ENSMUSG00000024369	NELFE	1.004	2.01893e-22
ENSMUSG00000024378	STARD4	1.427	5.50618e-19
ENSMUSG00000024381	BIN1	-2.34	1.65903e-06
ENSMUSG00000024399	LTB	-1.719	1.91505e-14
ENSMUSG00000024401	TNF	-2.081	0.000184602
ENSMUSG00000024402	LTA	-2.188	3.29572e-20
ENSMUSG00000024404	RIOK3	-2.016	0.00839223
ENSMUSG00000024411	AQP4	-4.741	0.000564188
ENSMUSG00000024414	MRPL27	1.376	1.76276e-32
ENSMUSG00000024420	ZFP521	4.738	1.6118e-39
ENSMUSG00000024421	LAMA3	-2.892	0.00105064
ENSMUSG00000024430	CABYR	1.923	1.55732e-13
ENSMUSG00000024442	DELE1	1.696	1.79081e-41
ENSMUSG00000024451	ARAP3	1.666	2.74138e-12
ENSMUSG00000024462	GABBR1	-1.03	1.65136e-12
ENSMUSG00000024479	MAL2	-3.373	0.00020652
ENSMUSG00000024486	HBEGF	-3.08	0.000122839
ENSMUSG00000024493	LARS	1.387	6.63668e-47
ENSMUSG00000024501	DPYSL3	-3.203	0.000439648
ENSMUSG00000024507	HSD17B4	1.092	1.87669e-23
ENSMUSG00000024521	PMAIP1	-1.424	4.76154e-10
ENSMUSG00000024526	CIDEA	-4.051	9.71251e-06
ENSMUSG00000024537	PSMG2	1.864	2.26249e-55
ENSMUSG00000024539	PTPN2	1.074	2.01206e-25
ENSMUSG00000024548	SETBP1	-2.232	1.20439e-22
ENSMUSG00000024552	SLC14A2	-3.439	9.81258e-05
ENSMUSG00000024556	ME2	1.663	5.3063e-39
ENSMUSG00000024561	MBD1	1.056	6.41739e-34
ENSMUSG00000024570	RBFA	1.939	1.09917e-92
ENSMUSG00000024571	GM16286	1.155	3.08304e-47
ENSMUSG00000024579	PCYOX1L	1.281	6.02813e-14
ENSMUSG00000024583	TXNL1	1.73	8.22924e-30
ENSMUSG00000024588	FECH	-2.179	0.0243871
ENSMUSG00000024590	LMNB1	1.19	4.96274e-06
ENSMUSG00000024597	SLC12A2	-1.263	1.51333e-05
ENSMUSG00000024610	CD74	-1.547	1.18467e-06
ENSMUSG00000024617	CAMK2A	-1.254	1.4802e-05
ENSMUSG00000024639	GNAQ	-1.073	0.013949
ENSMUSG00000024640	PSAT1	3.519	1.51891e-174
ENSMUSG00000024659	ANXA1	-1.357	0.000476168
ENSMUSG00000024660	INCENP	1.401	1.59276e-08
ENSMUSG00000024661	FTH1	-1.691	0.0127071
ENSMUSG00000024665	FADS2	1.298	0.0213382
ENSMUSG00000024672	MS4A7	1.215	0.00150421
ENSMUSG00000024673	MS4A1	-2.068	1.00434e-12
ENSMUSG00000024675	MS4A4C	-1.523	1.51914e-10
ENSMUSG00000024678	MS4A4D	-1.848	1.04555e-07
ENSMUSG00000024679	MS4A6D	1.056	0.0162796
ENSMUSG00000024680	MS4A2	8.133	4.75731e-178
ENSMUSG00000024683	MRPL16	1.533	1.00618e-24
ENSMUSG00000024697	GNA14	7.502	1.8142e-82
ENSMUSG00000024726	CARNMT1	2.012	1.87084e-54
ENSMUSG00000024727	TRPM6	-3.041	0.000594072
ENSMUSG00000024735	PRPF19	1.144	5.44699e-14
ENSMUSG00000024736	TMEM132A	-1.425	4.54666e-05
ENSMUSG00000024737	SLC15A3	-1.293	0.00540856
ENSMUSG00000024738	PGA5	8.973	3.66405e-53
ENSMUSG00000024740	DDB1	1.694	6.40708e-59
ENSMUSG00000024742	FEN1	2.358	8.01376e-86
ENSMUSG00000024743	SYT7	-2.906	0.0456378
ENSMUSG00000024747	ALDH1A7	-2.969	0.00119744
ENSMUSG00000024749	TMC1	-3.542	5.77883e-05
ENSMUSG00000024759	ATL3	1.42	1.5422e-53
ENSMUSG00000024761	GM16437	-1.554	0.0329786
ENSMUSG00000024774	ANKRD22	-1.836	0.000700881
ENSMUSG00000024776	STAMBPL1	-1.72	7.5837e-16
ENSMUSG00000024778	FAS	-1.422	1.19346e-06
ENSMUSG00000024782	AK3	1.613	6.17233e-32
ENSMUSG00000024784	GPHA2	-1.993	0.0443742
ENSMUSG00000024785	RCL1	1.49	1.64063e-40
ENSMUSG00000024790	SAC3D1	1.976	7.92224e-48
ENSMUSG00000024791	CDCA5	4.757	4.67751e-130
ENSMUSG00000024795	KIF20B	1.562	9.47096e-34
ENSMUSG00000024800	RPP30	1.074	1.50082e-15
ENSMUSG00000024810	IL33	-4.545	0.00354824
ENSMUSG00000024812	TJP2	-2.53	0.000110138
ENSMUSG00000024826	DPF2	1.042	5.51946e-42
ENSMUSG00000024829	MRPL21	1.151	1.78018e-16
ENSMUSG00000024833	POLA2	1.184	6.89273e-28
ENSMUSG00000024844	BANF1	1.708	7.98068e-62
ENSMUSG00000024871	DOC2G	-1.186	1.36952e-07
ENSMUSG00000024875	YIF1A	1.204	1.01672e-17
ENSMUSG00000024883	RIN1	-1.093	0.000287424
ENSMUSG00000024896	MINPP1	3.122	2.79339e-188
ENSMUSG00000024899	PAPSS2	4.064	3.62363e-44
ENSMUSG00000024901	PELI3	-2.084	3.43922e-11
ENSMUSG00000024922	OVOL1	-2.942	5.00407e-05
ENSMUSG00000024924	VLDLR	-2.354	0.00572901
ENSMUSG00000024925	RNASEH2C	1.284	1.70208e-32
ENSMUSG00000024935	SLC1A1	-3.049	0.000156978
ENSMUSG00000024944	ARL2	1.104	4.47132e-21
ENSMUSG00000024948	MAP4K2	-1.795	4.52317e-19
ENSMUSG00000024953	PRDX5	-1.082	0.00128003
ENSMUSG00000024959	BAD	1.286	1.32701e-27
ENSMUSG00000024960	PLCB3	1.235	7.09319e-26
ENSMUSG00000024962	VEGFB	1.725	4.12986e-33
ENSMUSG00000024966	STIP1	1.049	4.41323e-07
ENSMUSG00000024968	RCOR2	-1.968	3.06922e-17
ENSMUSG00000024974	SMC3	1.141	1.23445e-38
ENSMUSG00000024978	GPAM	1.191	6.39576e-15
ENSMUSG00000024981	ACSL5	1.907	4.24855e-97
ENSMUSG00000024982	ZDHHC6	1.098	2.55918e-21
ENSMUSG00000024987	CYP26A1	2.102	1.4203e-09
ENSMUSG00000024989	CEP55	3.121	2.38229e-62
ENSMUSG00000024997	PRDX3	2.399	5.41741e-18
ENSMUSG00000024998	PLCE1	-1.722	0.00140984
ENSMUSG00000025001	HELLS	1.894	1.11078e-40
ENSMUSG00000025007	ALDH18A1	2.036	6.43446e-104
ENSMUSG00000025017	PIK3AP1	-1.963	1.72197e-18
ENSMUSG00000025025	MXI1	-1.723	0.0115914
ENSMUSG00000025027	XPNPEP1	1.629	1.02103e-08
ENSMUSG00000025044	MSR1	-1.364	0.00334788
ENSMUSG00000025064	COL17A1	-3.083	0.0040794
ENSMUSG00000025068	GSTO1	-3.375	0.000135817
ENSMUSG00000025076	CASP7	1.775	7.75306e-18
ENSMUSG00000025077	DCLRE1A	2.239	6.97668e-58
ENSMUSG00000025085	ABLIM1	-1.615	6.34385e-12
ENSMUSG00000025092	HSPA12A	-1.135	2.11029e-05
ENSMUSG00000025094	SLC18A2	3.04	7.98987e-11
ENSMUSG00000025130	P4HB	1.048	2.4907e-13
ENSMUSG00000025134	ALYREF	1.841	2.7094e-64
ENSMUSG00000025139	TOLLIP	-1.397	0.0173095
ENSMUSG00000025140	PYCR1	1.736	5.3882e-05
ENSMUSG00000025141	MYADML2	-3.176	9.4808e-06
ENSMUSG00000025147	MOB2	-1.108	0.0097155
ENSMUSG00000025150	CBR2	-3.886	0.000140593
ENSMUSG00000025151	MAGED1	-1.52	3.32467e-05
ENSMUSG00000025154	ARHGAP19	2.577	4.01869e-67
ENSMUSG00000025157	ZDHHC16	1.108	1.77145e-42
ENSMUSG00000025163	CD7	-1.535	0.000613333
ENSMUSG00000025189	CNNM1	9.716	7.78223e-112
ENSMUSG00000025194	ABCC2	-1.862	3.59145e-06
ENSMUSG00000025202	SCD3	-3.976	0.0168869
ENSMUSG00000025203	SCD2	2.503	4.04609e-72
ENSMUSG00000025204	NDUFB8	1.337	1.13952e-18
ENSMUSG00000025212	SFXN3	1.372	4.21364e-35
ENSMUSG00000025213	KAZALD1	6.387	7.3501e-151
ENSMUSG00000025217	BTRC	1.363	5.57355e-32
ENSMUSG00000025227	MFSD13A	1.986	2.84933e-24
ENSMUSG00000025241	FYCO1	-1.862	3.38378e-06
ENSMUSG00000025246	TBL1X	1.013	4.90206e-17
ENSMUSG00000025260	HSD17B10	1.013	6.68927e-18
ENSMUSG00000025266	GNL3L	1.086	1.15299e-33
ENSMUSG00000025268	MAGED2	-3.521	5.56711e-05
ENSMUSG00000025270	ALAS2	-2.887	0.00678695
ENSMUSG00000025277	ABHD6	-1.383	5.22004e-10
ENSMUSG00000025278	FLNB	2.492	1.5848e-65
ENSMUSG00000025314	PTPRJ	-2.018	0.000345256
ENSMUSG00000025328	PADI3	6.838	3.13691e-141
ENSMUSG00000025330	PADI4	-1.945	1.16158e-05
ENSMUSG00000025350	RDH5	-1.242	6.04015e-08
ENSMUSG00000025352	GDF11	-2.221	1.04508e-16
ENSMUSG00000025353	ORMDL2	1.545	2.84723e-48
ENSMUSG00000025355	MMP19	-3.541	2.26156e-05
ENSMUSG00000025357	DGKA	-1.126	1.36153e-10
ENSMUSG00000025358	CDK2	1.261	2.53447e-22
ENSMUSG00000025362	RPS26	1.287	2.33741e-24
ENSMUSG00000025364	PA2G4	1.948	2.14252e-72
ENSMUSG00000025366	ESYT1	1.397	1.69145e-23
ENSMUSG00000025372	BAIAP2	-2.241	5.43984e-21
ENSMUSG00000025375	AATK	-2.227	3.58218e-07
ENSMUSG00000025380	FSCN2	-2.558	6.9708e-05
ENSMUSG00000025381	CNPY2	2.132	1.52855e-78
ENSMUSG00000025383	IL23A	-2.816	0.0155922
ENSMUSG00000025393	ATP5B	1.084	0.000669009
ENSMUSG00000025395	PRIM1	2.271	2.10914e-60
ENSMUSG00000025400	TAC2	2.331	0.0122881
ENSMUSG00000025401	MYO1A	-1.732	9.26966e-08
ENSMUSG00000025403	SHMT2	2.244	8.40121e-74
ENSMUSG00000025417	PIP4K2C	1.778	1.60356e-101
ENSMUSG00000025427	RNF165	-3.6	3.15095e-06
ENSMUSG00000025428	ATP5A1	1.256	1.25548e-27
ENSMUSG00000025429	PSTPIP2	2.572	2.58811e-43
ENSMUSG00000025433	CRISP3	-1.864	2.27629e-06
ENSMUSG00000025461	CD163L1	-1.231	0.000405962
ENSMUSG00000025473	ADAM8	-1.787	0.00018213
ENSMUSG00000025474	TUBGCP2	1.061	5.02265e-18
ENSMUSG00000025477	INPP5A	-1.75	0.000421382
ENSMUSG00000025481	URAH	-3.693	0.0024039
ENSMUSG00000025489	IFITM5	-2.014	0.00045304
ENSMUSG00000025491	IFITM1	-2.903	7.42529e-07
ENSMUSG00000025492	IFITM3	-1.216	0.00022601
ENSMUSG00000025500	LMNTD2	-2.163	4.38529e-18
ENSMUSG00000025503	TALDO1	-1.632	0.00584862
ENSMUSG00000025504	EPS8L2	-3.115	0.00010377
ENSMUSG00000025507	PIDD1	1.27	1.3047e-19
ENSMUSG00000025510	CD151	-2.086	0.00462576
ENSMUSG00000025511	TSPAN4	3.726	3.03639e-106
ENSMUSG00000025533	ASL	1.352	1.27901e-46
ENSMUSG00000025545	CLYBL	1.071	5.41299e-17
ENSMUSG00000025555	FARP1	-1.134	0.00151426
ENSMUSG00000025557	SLC15A1	-3.105	3.90207e-05
ENSMUSG00000025558	DOCK9	1.419	1.54975e-35
ENSMUSG00000025573	6030468B19RIK	2.998	1.24624e-43
ENSMUSG00000025574	TK1	2.223	5.93315e-56
ENSMUSG00000025580	EIF4A3	1.05	9.65212e-13
ENSMUSG00000025591	TMA16	1.223	1.16542e-15
ENSMUSG00000025597	KLHL4	-1.941	1.0121e-07
ENSMUSG00000025608	PODXL	9.007	9.02703e-115
ENSMUSG00000025613	CCT8	1.522	2.86023e-49
ENSMUSG00000025630	HPRT	2.052	2.96764e-72
ENSMUSG00000025647	SHISA5	-1.272	3.84499e-08
ENSMUSG00000025648	PFKFB4	-2.254	2.4018e-11
ENSMUSG00000025650	COL7A1	-1.386	0.000228409
ENSMUSG00000025651	UQCRC1	1.275	8.9307e-41
ENSMUSG00000025656	ARHGEF9	-1.293	0.0152479
ENSMUSG00000025701	ALOX5	4.219	1.43728e-55
ENSMUSG00000025728	PIGQ	1.336	3.21654e-06
ENSMUSG00000025732	MCRIP2	2.578	1.2379e-50
ENSMUSG00000025746	IL6	4.1	3.51154e-36
ENSMUSG00000025747	TYMS	3.426	7.48615e-57
ENSMUSG00000025754	AGBL1	-2.236	3.86444e-08
ENSMUSG00000025758	PLK4	2.065	1.44104e-14
ENSMUSG00000025781	ATP5C1	1.076	1.00931e-29
ENSMUSG00000025784	CLEC3B	-3.452	1.41906e-05
ENSMUSG00000025785	EXOSC7	1.302	1.13254e-33
ENSMUSG00000025786	ZDHHC3	1.059	5.31297e-21
ENSMUSG00000025794	RPL14	1.696	1.04313e-32
ENSMUSG00000025795	RASSF3	-1.025	1.67057e-07
ENSMUSG00000025804	CCR1	-1.613	0.00209084
ENSMUSG00000025812	PARD3	-2.95	0.000132716
ENSMUSG00000025813	HOMER2	4.881	4.33762e-31
ENSMUSG00000025817	NUDT5	1.522	1.24723e-41
ENSMUSG00000025825	ISCU	-1.948	0.00474055
ENSMUSG00000025856	PDGFA	-3.821	7.13761e-06
ENSMUSG00000025858	GET4	1.164	9.67091e-24
ENSMUSG00000025867	CPLX2	1.085	5.86131e-05
ENSMUSG00000025869	NOP16	1.618	1.41712e-33
ENSMUSG00000025871	4833439L19RIK	-1.383	0.0109372
ENSMUSG00000025875	TSPAN17	-3.008	0.000198797
ENSMUSG00000025877	HK3	-1.666	7.71497e-06
ENSMUSG00000025880	SMAD7	-1.307	1.03965e-12
ENSMUSG00000025885	MYO5B	-3.533	0.000341386
ENSMUSG00000025888	CASP1	-1.264	7.37883e-10
ENSMUSG00000025889	SNCA	-2.893	0.00527306
ENSMUSG00000025899	ALKBH8	1.677	2.29697e-79
ENSMUSG00000025912	MYBL1	1.313	1.43735e-13
ENSMUSG00000025917	COPS5	1.382	6.71406e-46
ENSMUSG00000025920	STAU2	-2.956	4.21033e-05
ENSMUSG00000025927	TFAP2B	-5.061	0.000768674
ENSMUSG00000025932	EYA1	-3.166	5.41719e-32
ENSMUSG00000025933	TMEM14A	-1.462	0.036137
ENSMUSG00000025934	GSTA3	-2.25	0.0163318
ENSMUSG00000025936	GM4956	1.155	2.28284e-06
ENSMUSG00000025938	SLCO5A1	-3.13	5.8784e-22
ENSMUSG00000025940	TMEM70	1.045	8.93266e-19
ENSMUSG00000025962	FASTKD2	1.112	1.04321e-13
ENSMUSG00000025977	BOLL	1.117	1.17482e-06
ENSMUSG00000025978	RFTN2	-1.755	3.74872e-10
ENSMUSG00000025980	HSPD1	1.475	4.91604e-18
ENSMUSG00000025983	CCDC150	-3.668	1.25927e-05
ENSMUSG00000025997	IKZF2	4.574	3.84814e-156
ENSMUSG00000026003	ACADL	1.792	4.44901e-65
ENSMUSG00000026012	CD28	-1.25	3.18899e-06
ENSMUSG00000026014	RAPH1	-1.008	0.000329238
ENSMUSG00000026020	NOP58	1.722	2.71214e-51
ENSMUSG00000026024	ALS2	2.369	3.68247e-132
ENSMUSG00000026027	STRADB	-2.35	0.0010851
ENSMUSG00000026031	CFLAR	-1.088	0.000289095
ENSMUSG00000026032	NDUFB3	1.101	6.56958e-22
ENSMUSG00000026035	PPIL3	-1.271	0.00730572
ENSMUSG00000026037	ORC2	1.347	4.29294e-34
ENSMUSG00000026039	SGO2A	3.367	1.49265e-57
ENSMUSG00000026043	COL3A1	-4.249	0.000725756
ENSMUSG00000026047	KDELC1	2.276	5.09952e-94
ENSMUSG00000026049	TEX30	1.354	9.77579e-23
ENSMUSG00000026065	SLC9A4	-2.242	0.0404322
ENSMUSG00000026068	IL18RAP	-1.795	8.76451e-09
ENSMUSG00000026069	IL1RL1	8.478	2.22721e-280
ENSMUSG00000026072	IL1R1	4.127	6.18951e-32
ENSMUSG00000026073	IL1R2	-2.881	1.85744e-06
ENSMUSG00000026077	NPAS2	-2.119	0.00261434
ENSMUSG00000026080	CHST10	-1.202	1.48927e-08
ENSMUSG00000026083	EIF5B	1.333	1.54997e-45
ENSMUSG00000026090	2010300C02RIK	-2.169	0.00149197
ENSMUSG00000026094	STK17B	-1.33	4.99031e-13
ENSMUSG00000026102	INPP1	-1.292	1.66113e-18
ENSMUSG00000026107	NABP1	-1.319	9.08201e-14
ENSMUSG00000026112	COA5	-1.357	0.0236876
ENSMUSG00000026113	INPP4A	-2.062	5.31374e-09
ENSMUSG00000026116	TMEM131	1.184	6.56518e-19
ENSMUSG00000026121	SEMA4C	2.773	1.70475e-36
ENSMUSG00000026126	PTPN18	-1.843	0.000671554
ENSMUSG00000026134	PRIM2	1.366	3.47591e-14
ENSMUSG00000026153	FAM135A	-2.097	3.06529e-05
ENSMUSG00000026155	SMAP1	-1.344	0.0437508
ENSMUSG00000026158	OGFRL1	-1.696	1.73843e-06
ENSMUSG00000026167	WNT10A	-2.899	5.0776e-10
ENSMUSG00000026170	CYP27A1	-2.02	1.27694e-20
ENSMUSG00000026172	BCS1L	1.137	2.96765e-14
ENSMUSG00000026174	CNOT9	1.508	4.94033e-36
ENSMUSG00000026177	SLC11A1	-1.223	0.000425999
ENSMUSG00000026180	CXCR2	-1.953	0.00049693
ENSMUSG00000026185	IGFBP5	-3.582	0.00161808
ENSMUSG00000026192	ATIC	1.52	4.62331e-53
ENSMUSG00000026196	BARD1	1.911	4.31111e-06
ENSMUSG00000026201	STK16	1.027	1.11951e-21
ENSMUSG00000026202	TUBA4A	1.018	0.0117111
ENSMUSG00000026203	DNAJB2	-1.651	0.00864409
ENSMUSG00000026204	PTPRN	-2.014	0.00804685
ENSMUSG00000026209	DNPEP	1.416	2.1757e-50
ENSMUSG00000026220	SLC16A14	-3.049	2.49136e-09
ENSMUSG00000026222	SP100	-1.076	7.27135e-13
ENSMUSG00000026223	ITM2C	1.46	1.74946e-28
ENSMUSG00000026229	PSMD1	1.429	3.99507e-73
ENSMUSG00000026235	EPHA4	-2.4	8.46544e-05
ENSMUSG00000026239	PDE6D	1.548	1.41916e-45
ENSMUSG00000026249	SERPINE2	-3.015	0.00031263
ENSMUSG00000026260	NDUFA10	1.207	6.71199e-35
ENSMUSG00000026274	PASK	3.409	6.79935e-117
ENSMUSG00000026278	BOK	-2.753	0.0214927
ENSMUSG00000026279	THAP4	1.106	1.48072e-25
ENSMUSG00000026281	DTYMK	1.566	1.14015e-38
ENSMUSG00000026303	MLPH	-2.846	0.0238009
ENSMUSG00000026308	KLHL30	-1.631	0.00138922
ENSMUSG00000026315	SERPINB8	-1.926	0.000573303
ENSMUSG00000026327	SERPINB11	-3.484	0.00016779
ENSMUSG00000026335	PAM	-1.504	0.0104149
ENSMUSG00000026342	SLC35F5	-1.663	8.1556e-06
ENSMUSG00000026344	LYPD1	1.548	0.0341473
ENSMUSG00000026347	TMEM163	-2.391	1.27656e-27
ENSMUSG00000026355	MCM6	2.946	5.09518e-167
ENSMUSG00000026356	DARS	1.373	7.15634e-51
ENSMUSG00000026357	RGS18	-2.61	0.00167109
ENSMUSG00000026358	RGS1	3.154	7.45995e-35
ENSMUSG00000026360	RGS2	-1.154	0.000140257
ENSMUSG00000026374	TSN	1.056	8.7295e-31
ENSMUSG00000026377	NIFK	1.514	1.33814e-33
ENSMUSG00000026380	TFCP2L1	-2.756	0.0137762
ENSMUSG00000026383	EPB41L5	-2.071	1.159e-15
ENSMUSG00000026385	DBI	1.696	6.81463e-24
ENSMUSG00000026389	STEAP3	4.415	4.68357e-136
ENSMUSG00000026395	PTPRC	-1.58	4.11378e-09
ENSMUSG00000026401	CD55B	-1.283	5.94973e-05
ENSMUSG00000026411	TMEM9	4.662	1.69494e-251
ENSMUSG00000026417	PIGR	-3.757	1.40134e-05
ENSMUSG00000026427	EIF2D	2.5	5.04048e-159
ENSMUSG00000026429	UBE2T	1.719	4.17517e-32
ENSMUSG00000026435	SLC45A3	5.938	1.70197e-30
ENSMUSG00000026437	CDK18	-2.896	0.000871719
ENSMUSG00000026447	PIK3C2B	-1.751	7.96342e-27
ENSMUSG00000026450	CHIT1	-3.679	8.40141e-05
ENSMUSG00000026457	ADIPOR1	-2.087	0.00866844
ENSMUSG00000026458	PPFIA4	-1.132	9.0164e-05
ENSMUSG00000026475	RGS16	-1.748	0.00587789
ENSMUSG00000026478	LAMC1	1.345	5.76524e-07
ENSMUSG00000026480	NCF2	-1.051	5.10598e-05
ENSMUSG00000026482	RGL1	2.571	5.14189e-89
ENSMUSG00000026489	COQ8A	-1.444	5.04725e-14
ENSMUSG00000026490	CDC42BPA	-3.071	0.000112873
ENSMUSG00000026494	KIF26B	9.039	4.203e-101
ENSMUSG00000026495	EFCAB2	-1.188	7.59593e-06
ENSMUSG00000026504	SDCCAG8	-1.033	0.00124606
ENSMUSG00000026514	CNIH3	-4.133	6.59623e-05
ENSMUSG00000026519	TMEM63A	1.152	1.34162e-41
ENSMUSG00000026520	PYCR2	1.68	9.47696e-46
ENSMUSG00000026532	SPTA1	-2.506	0.0119558
ENSMUSG00000026535	IFI202B	-4.098	0.000142868
ENSMUSG00000026536	IFI211	-1.545	0.000171552
ENSMUSG00000026544	DUSP23	-3.129	8.80429e-05
ENSMUSG00000026556	VANGL2	-2.475	4.33366e-21
ENSMUSG00000026558	UCK2	2.946	5.49514e-136
ENSMUSG00000026563	TADA1	1.174	8.45923e-18
ENSMUSG00000026576	ATP1B1	-1.314	1.06067e-09
ENSMUSG00000026579	F5	-3.358	9.13784e-05
ENSMUSG00000026580	SELP	-1.907	0.00837286
ENSMUSG00000026581	SELL	-1.575	2.4983e-08
ENSMUSG00000026589	SEC16B	-1.497	3.01082e-08
ENSMUSG00000026594	RALGPS2	-2.104	1.22461e-29
ENSMUSG00000026603	SMYD2	2.479	7.56646e-37
ENSMUSG00000026605	CENPF	2.971	7.76533e-12
ENSMUSG00000026614	SLC30A10	8.998	8.20689e-76
ENSMUSG00000026615	EPRS	1.238	9.98161e-47
ENSMUSG00000026616	CR2	-1.936	1.45508e-11
ENSMUSG00000026618	IARS2	1.329	6.76551e-28
ENSMUSG00000026621	2019-03-01	-1.638	0.000256865
ENSMUSG00000026622	NEK2	3.94	6.08492e-91
ENSMUSG00000026623	LPGAT1	-1.991	4.72313e-18
ENSMUSG00000026628	ATF3	-1.141	0.0112131
ENSMUSG00000026637	TRAF5	-1.226	3.81168e-13
ENSMUSG00000026638	IRF6	-1.401	0.000284569
ENSMUSG00000026639	LAMB3	-2.724	3.47836e-23
ENSMUSG00000026643	NMT2	1.561	3.47937e-30
ENSMUSG00000026646	SUV39H2	2.817	6.40435e-75
ENSMUSG00000026649	CFAP126	1.746	1.0547e-13
ENSMUSG00000026657	FRMD4A	3.488	4.51738e-114
ENSMUSG00000026662	SEPHS1	1.331	3.24128e-22
ENSMUSG00000026669	MCM10	3.923	7.24006e-32
ENSMUSG00000026670	UAP1	2.32	6.09552e-134
ENSMUSG00000026672	OPTN	1.207	0.0384042
ENSMUSG00000026674	DDR2	-3.455	0.0045977
ENSMUSG00000026675	HSD17B7	-1.331	1.30224e-09
ENSMUSG00000026676	CCDC3	-4.751	0.0057771
ENSMUSG00000026679	ENKUR	1.589	7.65264e-13
ENSMUSG00000026683	NUF2	4.944	1.63515e-56
ENSMUSG00000026687	ALDH9A1	1.29	9.74768e-23
ENSMUSG00000026688	MGST3	1.886	0.0001494
ENSMUSG00000026701	PRDX6	-2.208	0.00152319
ENSMUSG00000026708	CENPL	1.429	7.74384e-35
ENSMUSG00000026709	DARS2	1.024	3.29394e-19
ENSMUSG00000026712	MRC1	1.57	3.51652e-05
ENSMUSG00000026721	RABGAP1L	-1.478	6.81082e-07
ENSMUSG00000026728	VIM	1.417	1.99867e-08
ENSMUSG00000026748	PLXDC2	3.808	4.50205e-27
ENSMUSG00000026749	NEK6	-1.221	0.000762623
ENSMUSG00000026750	PSMB7	1.266	6.40052e-42
ENSMUSG00000026755	ARPC5L	-1.174	3.2617e-14
ENSMUSG00000026765	LYPD6B	1.106	0.000179243
ENSMUSG00000026766	MMADHC	1.086	7.85081e-28
ENSMUSG00000026768	ITGA8	-2.992	2.42775e-14
ENSMUSG00000026773	PFKFB3	-1.575	4.63082e-07
ENSMUSG00000026779	MASTL	2.734	7.97469e-16
ENSMUSG00000026782	ABI2	-2.893	9.84373e-05
ENSMUSG00000026785	PKN3	1.082	0.000442765
ENSMUSG00000026791	SLC2A8	1.316	1.7715e-20
ENSMUSG00000026796	FAM129B	1.683	7.48754e-09
ENSMUSG00000026797	STXBP1	2.234	2.15548e-13
ENSMUSG00000026811	ST6GALNAC6	1.404	2.10666e-24
ENSMUSG00000026814	ENG	2.302	1.39742e-24
ENSMUSG00000026815	GFI1B	3.134	8.08466e-12
ENSMUSG00000026816	GTF3C5	1.451	7.85425e-29
ENSMUSG00000026821	RALGDS	-1.769	4.44186e-15
ENSMUSG00000026825	DNM1	-2.803	0.0049986
ENSMUSG00000026826	NR4A2	2.231	4.36577e-15
ENSMUSG00000026833	OLFM1	2.895	1.49307e-21
ENSMUSG00000026835	FCNB	2.017	0.000282092
ENSMUSG00000026836	ACVR1	2.297	7.10337e-22
ENSMUSG00000026837	COL5A1	8.091	7.17621e-104
ENSMUSG00000026843	FUBP3	1.38	6.17806e-54
ENSMUSG00000026866	KYNU	-1.728	5.385e-15
ENSMUSG00000026869	PSMD5	1.044	8.91173e-29
ENSMUSG00000026873	PHF19	1.712	4.36548e-19
ENSMUSG00000026875	TRAF1	-1.09	1.74203e-07
ENSMUSG00000026880	STOM	-1.538	0.0269176
ENSMUSG00000026883	DAB2IP	-2.099	1.45272e-08
ENSMUSG00000026885	TTLL11	-3.515	5.42183e-05
ENSMUSG00000026893	GCA	-1.852	2.97916e-08
ENSMUSG00000026895	NDUFA8	1.309	1.13439e-28
ENSMUSG00000026914	PSMD14	1.299	3.02849e-48
ENSMUSG00000026915	STRBP	-1.428	2.91358e-16
ENSMUSG00000026921	EGFL7	7.593	1.19941e-116
ENSMUSG00000026923	NOTCH1	-1.452	5.82964e-07
ENSMUSG00000026926	PMPCA	1.055	2.80458e-23
ENSMUSG00000026928	CARD9	-1.473	5.13182e-06
ENSMUSG00000026930	GPSM1	-1.173	8.47533e-05
ENSMUSG00000026932	NACC2	-1.745	0.00444254
ENSMUSG00000026941	MAMDC4	-1.153	1.5554e-07
ENSMUSG00000026955	SAPCD2	5.198	2.48327e-41
ENSMUSG00000026961	LRRC26	-3.532	0.000294197
ENSMUSG00000026966	SSNA1	1.458	4.41212e-49
ENSMUSG00000026971	ITGB6	-3.071	0.00442822
ENSMUSG00000026974	ZMYND19	1.756	7.86966e-46
ENSMUSG00000026979	PSD4	-1.069	7.00389e-09
ENSMUSG00000026980	LY75	-1.313	1.41726e-12
ENSMUSG00000026981	IL1RN	-2.862	0.000143902
ENSMUSG00000026984	IL1F6	-3.413	0.000500188
ENSMUSG00000026985	IL1F8	-2.995	0.00467571
ENSMUSG00000026986	HNMT	-1.761	9.88107e-05
ENSMUSG00000026988	WDSUB1	1.366	1.6052e-30
ENSMUSG00000026991	PKP4	-1.626	1.85652e-06
ENSMUSG00000026994	GALNT3	-3.06	2.1323e-05
ENSMUSG00000027015	CYBRD1	2.233	1.94527e-11
ENSMUSG00000027018	HAT1	2.135	2.7399e-66
ENSMUSG00000027030	STK39	-1.017	0.000347021
ENSMUSG00000027035	CERS6	-1.201	0.000482062
ENSMUSG00000027067	SSRP1	1.138	5.20705e-15
ENSMUSG00000027068	DHRS9	-2.133	0.000174488
ENSMUSG00000027074	SLC43A3	2.835	2.07289e-10
ENSMUSG00000027075	SLC43A1	3.447	1.52479e-18
ENSMUSG00000027076	TIMM10	2.137	3.08326e-83
ENSMUSG00000027078	UBE2L6	-2.626	0.00898133
ENSMUSG00000027099	MTX2	1.628	1.25452e-35
ENSMUSG00000027108	OLA1	1.191	4.91772e-26
ENSMUSG00000027111	ITGA6	-2.769	0.000304278
ENSMUSG00000027115	KIF18A	1.608	6.13351e-12
ENSMUSG00000027133	NOP10	1.14	2.02587e-16
ENSMUSG00000027134	LPCAT4	-1.732	1.49288e-07
ENSMUSG00000027160	CCDC34	1.5	3.3308e-26
ENSMUSG00000027167	ELP4	1.677	9.06609e-50
ENSMUSG00000027168	PAX6	4.97	7.84924e-16
ENSMUSG00000027171	PRRG4	-1.519	6.63644e-13
ENSMUSG00000027175	TCP11L1	-1.346	0.0299271
ENSMUSG00000027180	FBXO3	1.553	1.2294e-58
ENSMUSG00000027184	CAPRIN1	1.033	2.00884e-21
ENSMUSG00000027186	ELF5	-3.945	0.000496195
ENSMUSG00000027187	CAT	-2.018	0.0141395
ENSMUSG00000027188	PAMR1	-4.505	5.47135e-06
ENSMUSG00000027189	TRIM44	-1.29	4.69919e-17
ENSMUSG00000027193	API5	1.116	8.99303e-19
ENSMUSG00000027195	HSD17B12	1.012	7.22194e-14
ENSMUSG00000027198	EXT2	1.186	3.54595e-26
ENSMUSG00000027199	GATM	2.048	1.0214e-09
ENSMUSG00000027200	SEMA6D	-2.691	0.000266202
ENSMUSG00000027202	SLC12A1	9.243	2.67479e-104
ENSMUSG00000027203	DUT	1.77	8.51087e-06
ENSMUSG00000027204	FBN1	-1.563	0.00774795
ENSMUSG00000027210	MEIS2	6.036	1.6416e-20
ENSMUSG00000027219	SLC28A2	-1.705	1.56574e-16
ENSMUSG00000027220	SYT13	-1.569	0.0272502
ENSMUSG00000027221	CHST1	2.727	4.18372e-08
ENSMUSG00000027225	DUOXA2	-3.231	0.000361099
ENSMUSG00000027230	CREB3L1	-1.799	0.0141814
ENSMUSG00000027238	FRMD5	3.301	9.42529e-15
ENSMUSG00000027242	WDR76	1.055	1.48883e-18
ENSMUSG00000027248	PDIA3	1.226	3.19427e-21
ENSMUSG00000027249	F2	3.061	4.74691e-20
ENSMUSG00000027254	MAP1A	-3.324	8.69442e-05
ENSMUSG00000027257	PACSIN3	1.489	0.0126804
ENSMUSG00000027270	LAMP5	-3.346	0.000768117
ENSMUSG00000027285	HAUS2	1.225	5.19957e-19
ENSMUSG00000027287	SNAP23	-1.766	0.0069485
ENSMUSG00000027293	EHD4	-2.102	0.000425468
ENSMUSG00000027297	LTK	-2.563	2.26499e-18
ENSMUSG00000027298	TYRO3	-1.407	0.000105661
ENSMUSG00000027303	PTPRA	1.182	3.40553e-29
ENSMUSG00000027313	CHAC1	-2.986	2.21366e-05
ENSMUSG00000027323	RAD51	4.022	4.8628e-179
ENSMUSG00000027324	RPUSD2	1.101	9.23396e-17
ENSMUSG00000027326	KNL1	1.487	0.00108683
ENSMUSG00000027329	SPEF1	2.553	5.10334e-79
ENSMUSG00000027331	KNSTRN	2.038	6.08439e-75
ENSMUSG00000027332	IVD	-1.695	1.32106e-21
ENSMUSG00000027339	RASSF2	-1.926	9.14061e-17
ENSMUSG00000027340	SLC23A2	-1.374	1.1715e-12
ENSMUSG00000027342	PCNA	1.963	1.75009e-55
ENSMUSG00000027344	FSIP1	-2.618	1.28021e-15
ENSMUSG00000027346	GPCPD1	-1.286	4.89487e-08
ENSMUSG00000027347	RASGRP1	-1.42	3.28007e-09
ENSMUSG00000027351	SPRED1	2.156	1.52255e-37
ENSMUSG00000027353	MCM8	1.786	2.27148e-43
ENSMUSG00000027356	FERMT1	-4.762	0.00147374
ENSMUSG00000027357	CRLS1	1.375	4.49527e-33
ENSMUSG00000027359	SLC27A2	-6.147	9.43302e-10
ENSMUSG00000027360	HDC	3.121	1.62045e-14
ENSMUSG00000027368	DUSP2	-2.24	7.87015e-17
ENSMUSG00000027375	MAL	-3.466	6.39115e-05
ENSMUSG00000027376	PROM2	-3.403	0.00345678
ENSMUSG00000027377	MALL	-3.42	0.000181263
ENSMUSG00000027378	NPHP1	3.036	4.4251e-21
ENSMUSG00000027379	BUB1	4.504	3.4937e-30
ENSMUSG00000027384	NDUFAF5	1.005	5.56047e-24
ENSMUSG00000027395	POLR1B	1.111	6.57075e-13
ENSMUSG00000027398	IL1B	-3.038	3.49355e-07
ENSMUSG00000027399	IL1A	-3.354	0.00047359
ENSMUSG00000027401	TGM3	-2.456	1.36506e-11
ENSMUSG00000027404	SNRPB	1.402	2.33121e-25
ENSMUSG00000027412	LPIN3	-2.271	0.00310241
ENSMUSG00000027435	CD93	-1.369	0.00319511
ENSMUSG00000027447	CST3	-1.126	0.000542364
ENSMUSG00000027452	ACSS1	1.089	7.46151e-17
ENSMUSG00000027454	GINS1	2.913	1.66714e-83
ENSMUSG00000027456	SDCBP2	-2.303	0.000657219
[truncated: 5,157 more rows]

## Sheet: Table S4 c2vsc1_DEG_table
Table S4 c2vsc1_DEG_table
gene	genesym	c2c1_logFC	c2c1_qval
ENSMUSG00000000028	CDC45	2.345	9.10591e-27
ENSMUSG00000000326	COMT	1.623	1.87825e-12
ENSMUSG00000000416	CTTNBP2	5.835	0.000310436
ENSMUSG00000000562	ADORA3	1.323	0.0459995
ENSMUSG00000000869	IL4	2.011	0.0203379
ENSMUSG00000000938	HOXA10	5.735	0.000200431
ENSMUSG00000000957	MMP14	2.3	0.00767314
ENSMUSG00000001014	ICAM4	2.716	4.92646e-11
ENSMUSG00000001056	NHP2	1.118	1.42361e-08
ENSMUSG00000001123	LGALS9	1.017	1.84195e-05
ENSMUSG00000001228	UHRF1	2.76	6.81389e-17
ENSMUSG00000001249	HPN	2.027	0.015503
ENSMUSG00000001380	HARS	1.12	3.68035e-13
ENSMUSG00000001436	SLC19A1	1.095	7.74501e-07
ENSMUSG00000001482	DEF8	1.195	1.04835e-06
ENSMUSG00000001517	FOXM1	2.131	2.84654e-23
ENSMUSG00000001525	TUBB5	1.039	6.40409e-06
ENSMUSG00000001707	EEF1E1	1.198	1.65348e-07
ENSMUSG00000001761	SMO	4.449	2.77231e-21
ENSMUSG00000001865	CPA3	2.305	0.0145766
ENSMUSG00000001901	KCNH6	-1.994	0.0213877
ENSMUSG00000002007	SRPK3	-1.008	0.0487035
ENSMUSG00000002190	CLGN	4.832	4.52739e-07
ENSMUSG00000002297	DBF4	1.074	9.8739e-09
ENSMUSG00000002343	ARMC6	1.347	2.832e-13
ENSMUSG00000002477	SNRPD1	1.24	8.13091e-09
ENSMUSG00000002688	PRKD1	3.932	0.00408154
ENSMUSG00000002771	GRIN2D	2.304	1.15991e-07
ENSMUSG00000002808	EPDR1	3.909	9.08555e-06
ENSMUSG00000002835	CHAF1A	2.763	6.4048e-22
ENSMUSG00000002870	MCM2	2.076	1.95189e-31
ENSMUSG00000003355	FKBP11	-1.217	0.00676298
ENSMUSG00000003438	TIMM50	1.13	4.30365e-07
ENSMUSG00000003585	SEC14L2	3.839	1.79025e-18
ENSMUSG00000003779	KIF20A	2.717	1.98829e-28
ENSMUSG00000003824	SYCE2	3.481	9.88792e-34
ENSMUSG00000003949	HLF	2.764	2.68402e-06
ENSMUSG00000004085	MAP3K20	1.088	0.0017559
ENSMUSG00000004105	ANGPTL2	1.085	0.00451074
ENSMUSG00000004270	LPCAT3	1.26	2.13236e-06
ENSMUSG00000004328	HIF3A	-1.366	0.0227224
ENSMUSG00000004473	CLEC11A	1.834	1.24343e-06
ENSMUSG00000004562	ARHGEF40	2.079	1.13258e-05
ENSMUSG00000004565	PNPLA6	1.067	1.34831e-07
ENSMUSG00000004748	MTFP1	1.684	3.11213e-11
ENSMUSG00000004897	HDGF	1.515	9.62465e-09
ENSMUSG00000004929	THOP1	1.127	3.74832e-07
ENSMUSG00000005148	KLF5	2.256	0.0169399
ENSMUSG00000005338	CADM3	1.581	0.000154198
ENSMUSG00000005339	FCER1A	3.648	3.40318e-10
ENSMUSG00000005360	SLC1A3	4.274	0.000510592
ENSMUSG00000005410	MCM5	2.162	1.6933e-22
ENSMUSG00000005470	ASF1B	2.678	3.66634e-22
ENSMUSG00000005583	MEF2C	-1.049	0.00129557
ENSMUSG00000005672	KIT	2.007	0.000191571
ENSMUSG00000005732	RANBP1	1.266	7.97901e-10
ENSMUSG00000006235	EPOR	2.139	0.0315735
ENSMUSG00000006342	SUSD2	2.47	1.84836e-07
ENSMUSG00000006356	CRIP2	1.324	0.00333582
ENSMUSG00000006386	TEK	2.73	0.01675
ENSMUSG00000006390	ELOVL1	1.049	8.52658e-06
ENSMUSG00000006398	CDC20	2.792	2.20457e-32
ENSMUSG00000006442	SRM	1.874	3.75736e-17
ENSMUSG00000006567	ATP7B	4.533	7.20573e-09
ENSMUSG00000006678	POLA1	1.507	0.00196929
ENSMUSG00000006715	GMNN	1.983	8.49711e-24
ENSMUSG00000007035	MSH5	1.029	0.000113672
ENSMUSG00000007039	DDAH2	2.817	2.14005e-23
ENSMUSG00000007050	LSM2	1.164	1.11201e-08
ENSMUSG00000007080	POLE	2.132	1.11241e-29
ENSMUSG00000008658	RBFOX1	3.728	0.000431146
ENSMUSG00000008843	CLDN13	3.108	0.00342085
ENSMUSG00000008999	BMP7	2.576	6.709e-10
ENSMUSG00000009112	BCL2L13	1.014	2.43086e-13
ENSMUSG00000009575	CBX5	1.232	6.98134e-18
ENSMUSG00000009733	TFCP2	2.362	1.4007e-23
ENSMUSG00000010021	KIF19A	-1.271	0.00311741
ENSMUSG00000010047	HYAL2	1.266	1.55672e-06
ENSMUSG00000010136	PIFO	-1.638	0.015503
ENSMUSG00000010461	EYA4	7.838	1.67783e-26
ENSMUSG00000010663	FADS1	1.707	7.89537e-11
ENSMUSG00000010797	WNT2	4.019	0.000917373
ENSMUSG00000010911	APIP	1.514	7.10315e-12
ENSMUSG00000012443	KIF11	3.24	4.53855e-07
ENSMUSG00000012483	RPA3	1.186	1.808e-06
ENSMUSG00000012519	MLKL	1.044	0.0123401
ENSMUSG00000013033	ADGRL1	1.398	2.01164e-08
ENSMUSG00000013155	ENKD1	1.934	4.66875e-13
ENSMUSG00000014633	CMC2	1.446	4.78775e-13
ENSMUSG00000014980	TSEN15	1.13	0.000253875
ENSMUSG00000015053	GATA2	2.206	0.00173176
ENSMUSG00000015217	HMGB3	2.944	2.60381e-26
ENSMUSG00000015542	NAT9	1.128	2.8519e-06
ENSMUSG00000015597	ZFP318	-1.069	0.00676274
ENSMUSG00000015879	FAM184B	3.111	0.000320834
ENSMUSG00000015880	NCAPG	3.164	9.76636e-07
ENSMUSG00000016128	STARD13	3.863	0.000248221
ENSMUSG00000016386	MPPED2	3.038	0.00413818
ENSMUSG00000016458	WT1	6.061	6.67176e-11
ENSMUSG00000016526	DYRK3	1.821	1.06137e-09
ENSMUSG00000016757	TTLL12	1.616	2.68639e-21
ENSMUSG00000017146	BRCA1	2.085	1.06589e-28
ENSMUSG00000017400	STAC2	-1.192	0.0050042
ENSMUSG00000017417	PLXDC1	1.68	4.99744e-07
ENSMUSG00000017499	CDC6	2.623	1.22067e-06
ENSMUSG00000017550	ATAD5	1.848	2.69053e-10
ENSMUSG00000017716	BIRC5	2.52	0.000353522
ENSMUSG00000017765	SLC12A4	1.389	1.40404e-10
ENSMUSG00000017861	MYBL2	2.6	1.92924e-12
ENSMUSG00000018001	CYTH3	1.421	4.69386e-06
ENSMUSG00000018166	ERBB3	1.119	0.0303257
ENSMUSG00000018189	UCHL5	1.051	1.07538e-08
ENSMUSG00000018341	IL12RB2	1.171	0.0225283
ENSMUSG00000018395	KIF3A	1.354	1.3489e-06
ENSMUSG00000018398	2019-09-08	3.062	3.36049e-07
ENSMUSG00000018428	AKAP1	2.104	3.5925e-16
ENSMUSG00000018446	C1QBP	1.139	2.93e-06
ENSMUSG00000018509	CENPV	1.934	0.000998367
ENSMUSG00000018844	FNDC8	3.157	0.000855464
ENSMUSG00000019214	CHTF18	1.52	3.94828e-11
ENSMUSG00000019301	HSD17B1	-1.19	0.031884
ENSMUSG00000019429	FFAR3	-2.033	0.0494292
ENSMUSG00000019467	ARHGEF25	4.115	7.82789e-12
ENSMUSG00000019478	RAB4A	2.709	2.98243e-14
ENSMUSG00000019590	CYB561	2.246	0.000198422
ENSMUSG00000019689	FMC1	1.199	6.13137e-07
ENSMUSG00000019773	FBXO5	1.547	8.7488e-10
ENSMUSG00000019942	CDK1	3.987	2.39403e-22
ENSMUSG00000019944	RHOBTB1	1.999	1.71152e-09
ENSMUSG00000019971	CEP290	1.718	3.507e-08
ENSMUSG00000019982	MYB	2.481	9.88792e-34
ENSMUSG00000019992	MTFR2	2.168	2.97828e-05
ENSMUSG00000020018	SNRPF	1.062	6.2137e-08
ENSMUSG00000020019	NTN4	2.85	0.000423826
ENSMUSG00000020022	NDUFA12	1.025	2.13737e-08
ENSMUSG00000020027	SOCS2	2.58	1.03844e-08
ENSMUSG00000020032	NUAK1	2.933	9.1395e-14
ENSMUSG00000020089	PPA1	1.216	1.63988e-07
ENSMUSG00000020185	E2F7	3.419	1.00184e-11
ENSMUSG00000020328	NUDCD2	1.603	1.78491e-19
ENSMUSG00000020330	HMMR	3.013	0.000384777
ENSMUSG00000020377	LTC4S	2.09	0.000523029
ENSMUSG00000020383	IL13	2.265	0.0145766
ENSMUSG00000020396	NEFH	2.987	2.35342e-15
ENSMUSG00000020471	POLD2	1.028	0.000486471
ENSMUSG00000020492	SKA2	1.18	2.21912e-08
ENSMUSG00000020493	PRR11	2.523	1.53152e-05
ENSMUSG00000020534	SHMT1	1.167	1.3317e-05
ENSMUSG00000020547	BZW2	1.112	4.54219e-06
ENSMUSG00000020593	LPIN1	1.513	1.84061e-14
ENSMUSG00000020649	RRM2	2.179	0.00234938
ENSMUSG00000020682	MMP28	1.421	0.00225106
ENSMUSG00000020739	NUP85	1.28	5.21193e-10
ENSMUSG00000020773	TRIM47	3.158	1.38084e-12
ENSMUSG00000020808	PIMREG	2.09	0.0125178
ENSMUSG00000020834	DHRS13	1.604	1.30897e-06
ENSMUSG00000020841	CPD	1.431	0.00670619
ENSMUSG00000020895	TMEM107	2.605	2.50092e-20
ENSMUSG00000020897	AURKB	2.483	2.45111e-30
ENSMUSG00000020900	MYH10	2.438	0.00694961
ENSMUSG00000020914	TOP2A	2.484	0.000340622
ENSMUSG00000020974	POLE2	1.454	1.61739e-15
ENSMUSG00000021048	MTHFD1	2.092	7.78119e-45
ENSMUSG00000021056	TEX21	3.751	9.35558e-05
ENSMUSG00000021118	PLEK2	3.564	0.0011289
ENSMUSG00000021175	CDCA7L	1.016	3.00369e-05
ENSMUSG00000021203	OTUB2	2.313	3.94729e-16
ENSMUSG00000021215	NET1	1.079	0.000268889
ENSMUSG00000021221	DPF3	2.375	0.0143844
ENSMUSG00000021250	FOS	-1.739	0.0479535
ENSMUSG00000021253	TGFB3	-1.301	0.00841929
ENSMUSG00000021287	XRCC3	1.072	0.00386832
ENSMUSG00000021319	SFRP4	5.851	2.09966e-07
ENSMUSG00000021361	TMEM14C	1.406	1.31752e-07
ENSMUSG00000021391	CENPP	2.434	6.66036e-09
ENSMUSG00000021485	MXD3	2.303	2.92278e-07
ENSMUSG00000021552	GKAP1	2.143	1.09022e-11
ENSMUSG00000021569	TRIP13	2.234	1.96387e-19
ENSMUSG00000021643	SERF1	1.254	0.00527894
ENSMUSG00000021707	DHFR	2.078	6.00553e-24
ENSMUSG00000021831	ERO1L	1.215	7.91097e-05
ENSMUSG00000021835	BMP4	4.902	1.3593e-08
ENSMUSG00000021932	RNASEH2B	1.267	3.48344e-14
ENSMUSG00000021965	SKA3	2.463	1.88289e-08
ENSMUSG00000022033	PBK	3.981	6.07697e-09
ENSMUSG00000022070	BORA	1.577	8.57971e-18
ENSMUSG00000022177	HAUS4	1.05	1.05663e-09
ENSMUSG00000022180	SLC7A8	2.374	2.75786e-09
ENSMUSG00000022197	PDZD2	1.646	2.96967e-05
ENSMUSG00000022225	CMA1	1.646	0.0138333
ENSMUSG00000022322	SHCBP1	3.271	4.63458e-06
ENSMUSG00000022325	POP1	1.225	2.14328e-06
ENSMUSG00000022346	MYC	1.116	1.43703e-06
ENSMUSG00000022360	ATAD2	1.313	5.49818e-15
ENSMUSG00000022385	GTSE1	2.331	1.38902e-17
ENSMUSG00000022422	DSCC1	2.309	1.76359e-18
ENSMUSG00000022474	PMM1	1.433	3.42546e-05
ENSMUSG00000022485	HOXC5	9.096	2.42474e-09
ENSMUSG00000022537	TMEM44	2.91	4.42969e-05
ENSMUSG00000022574	NAPRT	1.129	2.1112e-05
ENSMUSG00000022623	SHANK3	2.931	0.000494708
ENSMUSG00000022661	CD200	-1.017	0.00744011
ENSMUSG00000022673	MCM4	1.231	1.88227e-12
ENSMUSG00000022722	ARL6	1.711	3.181e-05
ENSMUSG00000022742	CPOX	1.832	0.000233019
ENSMUSG00000022750	KLHL22	2.136	4.17825e-26
ENSMUSG00000022756	SLC7A4	2.742	3.57979e-05
ENSMUSG00000022790	IGSF11	6.752	2.64023e-07
ENSMUSG00000022820	NDUFB4	1.223	3.66469e-06
ENSMUSG00000022833	CCDC14	1.618	4.58896e-13
ENSMUSG00000022881	RFC4	2.344	2.18433e-29
ENSMUSG00000022945	CHAF1B	2.619	1.89167e-32
ENSMUSG00000023004	TUBA1B	1.819	2.12452e-24
ENSMUSG00000023015	RACGAP1	1.352	2.35342e-15
ENSMUSG00000023030	SLC11A2	1.261	3.39627e-06
ENSMUSG00000023033	SCN8A	-2.082	0.0212332
ENSMUSG00000023089	NDUFA5	1.117	1.85381e-06
ENSMUSG00000023345	POC1A	1.301	4.4686e-10
ENSMUSG00000023505	CDCA3	2.207	0.000312769
ENSMUSG00000023571	C1QTNF12	2.634	5.81921e-17
ENSMUSG00000023809	RPS6KA2	1.977	1.14073e-07
ENSMUSG00000023828	SLC22A3	2.942	0.000603739
ENSMUSG00000023883	PHF10	1.363	9.04199e-16
ENSMUSG00000023909	PAQR4	3.267	5.27274e-23
ENSMUSG00000023940	SGO1	2.978	1.94562e-09
ENSMUSG00000023942	SLC29A1	2.321	6.84499e-23
ENSMUSG00000023960	ENPP5	1.974	0.0147423
ENSMUSG00000023961	ENPP4	1.958	1.29126e-14
ENSMUSG00000024008	CPNE5	-1.358	0.00494736
ENSMUSG00000024056	NDC80	1.082	2.77111e-07
ENSMUSG00000024301	KIFC5B	1.28	1.49797e-06
ENSMUSG00000024340	BTNL2	-1.109	0.00802051
ENSMUSG00000024420	ZFP521	2.747	0.00018184
ENSMUSG00000024640	PSAT1	2.168	3.10113e-24
ENSMUSG00000024680	MS4A2	3.158	3.04334e-09
ENSMUSG00000024697	GNA14	3.492	2.25863e-06
ENSMUSG00000024726	CARNMT1	1.376	3.55791e-09
ENSMUSG00000024742	FEN1	1.703	7.48151e-18
ENSMUSG00000024791	CDCA5	2.943	7.66584e-18
ENSMUSG00000024795	KIF20B	1.204	2.01288e-08
ENSMUSG00000024896	MINPP1	1.873	1.4499e-24
ENSMUSG00000024899	PAPSS2	1.511	0.0217066
ENSMUSG00000024966	STIP1	1.005	0.00831792
ENSMUSG00000024968	RCOR2	-1.039	0.0170972
ENSMUSG00000024989	CEP55	1.294	0.000876632
ENSMUSG00000025001	HELLS	1.849	3.7652e-16
ENSMUSG00000025007	ALDH18A1	1.029	3.87137e-10
ENSMUSG00000025076	CASP7	1.137	0.00359752
ENSMUSG00000025077	DCLRE1A	1.312	1.19467e-07
ENSMUSG00000025134	ALYREF	1.185	7.89537e-11
ENSMUSG00000025154	ARHGAP19	1.786	2.11111e-12
ENSMUSG00000025189	CNNM1	3.385	2.17928e-05
ENSMUSG00000025194	ABCC2	-2.63	0.000850664
ENSMUSG00000025203	SCD2	1.348	2.07758e-08
ENSMUSG00000025213	KAZALD1	3.695	6.81237e-18
ENSMUSG00000025278	FLNB	1.068	0.000107758
ENSMUSG00000025328	PADI3	2.442	5.77408e-06
ENSMUSG00000025364	PA2G4	1.174	1.89611e-10
ENSMUSG00000025395	PRIM1	1.772	2.03488e-14
ENSMUSG00000025400	TAC2	3.754	0.022964
ENSMUSG00000025403	SHMT2	1.424	1.54212e-11
ENSMUSG00000025507	PIDD1	1.159	8.89084e-07
ENSMUSG00000025511	TSPAN4	2.212	3.08456e-13
ENSMUSG00000025573	6030468B19RIK	1.049	0.0331352
ENSMUSG00000025574	TK1	1.964	1.91712e-17
ENSMUSG00000025608	PODXL	3.692	9.52801e-07
ENSMUSG00000025701	ALOX5	1.566	0.00417586
ENSMUSG00000025732	MCRIP2	1.356	2.97625e-05
ENSMUSG00000025747	TYMS	2.174	1.90651e-08
ENSMUSG00000025758	PLK4	1.488	0.00351926
ENSMUSG00000025867	CPLX2	1.416	0.00310824
ENSMUSG00000025912	MYBL1	1.183	0.000177098
ENSMUSG00000025980	HSPD1	1.139	0.000144181
ENSMUSG00000025997	IKZF2	1.902	8.61257e-09
ENSMUSG00000026020	NOP58	1.078	3.35222e-08
ENSMUSG00000026024	ALS2	1.069	5.83756e-10
ENSMUSG00000026037	ORC2	1.061	7.09744e-09
ENSMUSG00000026039	SGO2A	2.373	6.68321e-11
ENSMUSG00000026047	KDELC1	1.283	4.61746e-11
ENSMUSG00000026069	IL1RL1	2.776	6.36779e-10
ENSMUSG00000026134	PRIM2	1.333	1.17151e-05
ENSMUSG00000026274	PASK	2.751	3.30099e-28
ENSMUSG00000026281	DTYMK	1.25	4.39827e-10
ENSMUSG00000026355	MCM6	1.815	2.84654e-23
ENSMUSG00000026389	STEAP3	3.042	1.09527e-22
ENSMUSG00000026411	TMEM9	2.352	6.52913e-22
ENSMUSG00000026427	EIF2D	1.252	1.78269e-14
ENSMUSG00000026429	UBE2T	1.497	5.82653e-10
ENSMUSG00000026435	SLC45A3	2.994	0.00555329
ENSMUSG00000026494	KIF26B	4.697	1.71152e-09
ENSMUSG00000026558	UCK2	1.156	2.14118e-07
ENSMUSG00000026589	SEC16B	-1.352	0.00567907
ENSMUSG00000026605	CENPF	2.335	0.00679525
ENSMUSG00000026614	SLC30A10	5.162	6.18131e-09
ENSMUSG00000026622	NEK2	2.359	1.80096e-11
ENSMUSG00000026646	SUV39H2	1.862	7.52047e-12
ENSMUSG00000026657	FRMD4A	1.377	3.70339e-06
ENSMUSG00000026669	MCM10	2.492	0.000133452
ENSMUSG00000026670	UAP1	1.223	4.94124e-14
ENSMUSG00000026683	NUF2	3.548	2.34093e-10
ENSMUSG00000026779	MASTL	1.697	0.0137031
ENSMUSG00000026815	GFI1B	2.172	0.0280802
ENSMUSG00000026837	COL5A1	2.852	0.000238695
ENSMUSG00000026921	EGFL7	3.762	7.15452e-10
ENSMUSG00000026955	SAPCD2	2.775	0.00013782
ENSMUSG00000026974	ZMYND19	1.148	5.58002e-08
ENSMUSG00000027018	HAT1	1.434	3.88381e-12
ENSMUSG00000027075	SLC43A1	1.955	0.0217066
ENSMUSG00000027076	TIMM10	1.052	9.01268e-08
ENSMUSG00000027115	KIF18A	1.019	0.0315735
ENSMUSG00000027160	CCDC34	1.132	3.96953e-06
ENSMUSG00000027168	PAX6	3.039	0.0130018
ENSMUSG00000027202	SLC12A1	4.36	1.96429e-09
ENSMUSG00000027203	DUT	1.589	0.0464147
ENSMUSG00000027210	MEIS2	4.581	0.000168056
ENSMUSG00000027323	RAD51	2.844	4.32784e-32
ENSMUSG00000027329	SPEF1	1.12	1.45779e-05
ENSMUSG00000027331	KNSTRN	1.329	2.57766e-12
ENSMUSG00000027342	PCNA	1.211	1.59222e-08
ENSMUSG00000027353	MCM8	1.565	8.12057e-13
ENSMUSG00000027368	DUSP2	-1.153	0.00979148
ENSMUSG00000027378	NPHP1	3.112	1.38967e-08
ENSMUSG00000027379	BUB1	3.058	3.16795e-05
ENSMUSG00000027454	GINS1	2.241	1.36736e-18
ENSMUSG00000027463	SLC52A3	1.398	3.95182e-05
ENSMUSG00000027489	NECAB3	1.98	3.17931e-05
ENSMUSG00000027490	E2F1	1.823	5.67217e-10
ENSMUSG00000027496	AURKA	2.051	2.21277e-16
ENSMUSG00000027555	CAR13	3.877	7.60859e-16
ENSMUSG00000027556	CAR1	3.65	0.000115871
ENSMUSG00000027559	CAR3	4.74	0.000966011
ENSMUSG00000027583	ZBTB46	1.223	0.00232906
ENSMUSG00000027635	DSN1	1.05	6.89136e-08
ENSMUSG00000027669	GNB4	2.789	4.06649e-24
ENSMUSG00000027676	CCDC39	5.529	4.1423e-07
ENSMUSG00000027699	ECT2	1.908	4.73473e-05
ENSMUSG00000027752	EXOSC8	1.031	3.70147e-05
ENSMUSG00000027776	IL12A	-1.161	0.00295588
ENSMUSG00000027811	4930579G24RIK	1.52	9.33723e-11
ENSMUSG00000027883	GPSM2	1.576	0.000358241
ENSMUSG00000027895	KCNC4	4.3	3.15662e-07
ENSMUSG00000027977	NDST3	3.625	0.0281585
ENSMUSG00000028044	CKS1B	2.811	2.98826e-26
ENSMUSG00000028068	IQGAP3	2.53	0.00840597
ENSMUSG00000028184	ADGRL2	1.61	0.03782
ENSMUSG00000028185	DNASE2B	2.656	1.57461e-06
ENSMUSG00000028223	DECR1	1.903	2.96862e-20
ENSMUSG00000028224	NBN	1.349	2.62988e-14
ENSMUSG00000028256	ODF2L	1.059	5.71785e-08
ENSMUSG00000028289	EPHA7	4.577	2.18669e-15
ENSMUSG00000028312	SMC2	1.602	8.51121e-15
ENSMUSG00000028334	NANS	1.081	1.60129e-08
ENSMUSG00000028339	COL15A1	1.367	0.0165723
ENSMUSG00000028393	ALAD	1.992	1.49496e-17
ENSMUSG00000028399	PTPRD	5.129	0.0266939
ENSMUSG00000028438	KIF24	1.265	0.0308804
ENSMUSG00000028457	ATP8B5	2.542	0.0136004
ENSMUSG00000028521	SLC35D1	1.467	6.83329e-17
ENSMUSG00000028524	SGIP1	3.472	1.7334e-06
ENSMUSG00000028528	DNAJC6	2.167	9.58173e-11
ENSMUSG00000028551	CDKN2C	1.754	0.00270067
ENSMUSG00000028565	NFIA	2.217	6.84639e-20
ENSMUSG00000028614	NDC1	1.152	2.38124e-11
ENSMUSG00000028633	CTPS	1.26	2.58592e-14
ENSMUSG00000028643	SVBP	1.001	0.0198134
ENSMUSG00000028644	ERMAP	2.908	0.00373749
ENSMUSG00000028678	KIF2C	3.224	2.03553e-08
ENSMUSG00000028702	RAD54L	2.762	5.60177e-21
ENSMUSG00000028718	STIL	2.462	0.0016653
ENSMUSG00000028807	ZBTB8A	1.076	6.91643e-06
ENSMUSG00000028832	STMN1	2.182	2.29375e-13
ENSMUSG00000028836	SLC30A2	2.832	0.000287228
ENSMUSG00000028873	CDCA8	2.797	2.27443e-11
ENSMUSG00000028896	RCC1	1.343	2.4855e-16
ENSMUSG00000028927	PADI2	-1.044	0.00756801
ENSMUSG00000028943	ESPN	1.741	2.82418e-09
ENSMUSG00000029090	ADGRA3	1.804	0.00832266
ENSMUSG00000029167	PPARGC1A	-1.176	0.0057585
ENSMUSG00000029177	CENPA	1.326	6.95927e-12
ENSMUSG00000029310	NUDT9	1.636	2.87799e-28
ENSMUSG00000029363	RFC5	1.249	1.09169e-09
ENSMUSG00000029414	KNTC1	2.492	0.00105286
ENSMUSG00000029430	RAN	1.084	5.93949e-11
ENSMUSG00000029463	FAM216A	1.261	3.11646e-09
ENSMUSG00000029499	PXMP2	2.851	6.92285e-19
ENSMUSG00000029521	CHEK2	1.349	0.00469633
ENSMUSG00000029564	4930519G04RIK	-3.128	0.0173208
ENSMUSG00000029591	UNG	1.162	4.49625e-08
ENSMUSG00000029610	AIMP2	1.114	1.18602e-05
ENSMUSG00000029641	RASL11A	3.144	1.97803e-08
ENSMUSG00000029648	FLT1	-1.038	0.0227224
ENSMUSG00000029673	AUTS2	2.058	3.51173e-05
ENSMUSG00000029716	TFR2	3.072	3.01537e-12
ENSMUSG00000029730	MCM7	1.521	2.52718e-18
ENSMUSG00000029752	ASNS	3.324	6.99881e-05
ENSMUSG00000029802	ABCG2	1.85	0.0055082
ENSMUSG00000029910	MAD2L1	2.052	1.47366e-25
ENSMUSG00000029999	TGFA	2.25	0.0420534
ENSMUSG00000030048	GKN3	3.022	0.0106333
ENSMUSG00000030051	APLF	1.407	0.001702
ENSMUSG00000030074	GXYLT2	5.187	3.99792e-05
ENSMUSG00000030075	CNTN3	4.161	1.64651e-05
ENSMUSG00000030089	SLC41A3	1.857	1.85245e-15
ENSMUSG00000030103	BHLHE40	1.564	0.000300076
ENSMUSG00000030245	GOLT1B	1.127	8.37393e-12
ENSMUSG00000030303	FAR2	2.745	0.00015722
ENSMUSG00000030346	RAD51AP1	3.506	4.65916e-30
ENSMUSG00000030357	FKBP4	1.135	2.57377e-05
ENSMUSG00000030431	TMEM238	1.116	1.37622e-05
ENSMUSG00000030515	TARSL2	1.5	4.76824e-13
ENSMUSG00000030528	BLM	2.038	5.74307e-27
ENSMUSG00000030545	PEX11A	1.661	0.031525
ENSMUSG00000030559	RAB38	3.606	2.47688e-09
ENSMUSG00000030584	DPF1	3.581	6.9665e-07
ENSMUSG00000030641	DDIAS	2.019	1.09869e-12
ENSMUSG00000030664	SOX6OS	3.101	0.000233019
ENSMUSG00000030677	KIF22	3.035	8.5353e-27
ENSMUSG00000030711	SULT1A1	-1.316	0.0373383
ENSMUSG00000030768	DISP1	1.14	2.63615e-07
ENSMUSG00000030867	PLK1	2.848	5.65922e-29
ENSMUSG00000030978	RRM1	1.98	1.88051e-38
ENSMUSG00000031004	MKI67	2.182	0.0141036
ENSMUSG00000031016	WEE1	2.284	1.81304e-17
ENSMUSG00000031262	CENPI	2.43	2.3402e-07
ENSMUSG00000031438	RNF128	3.286	4.58984e-11
ENSMUSG00000031506	PTPN7	1.252	3.68214e-09
ENSMUSG00000031565	FGFR1	1.967	2.23284e-06
ENSMUSG00000031616	EDNRA	3.973	2.74929e-05
ENSMUSG00000031628	CASP3	1.91	0.00196167
ENSMUSG00000031629	CENPU	1.604	2.1519e-06
ENSMUSG00000031661	NKD1	2.75	0.00108
ENSMUSG00000031697	ORC6	1.879	4.25715e-21
ENSMUSG00000031727	PMFBP1	7.399	3.02839e-10
ENSMUSG00000031732	PHLPP2	1.109	1.45668e-11
ENSMUSG00000031736	CRNDE	2.95	0.000446811
ENSMUSG00000031756	CENPN	2.795	3.77427e-31
ENSMUSG00000031780	CCL17	2.289	0.0136166
ENSMUSG00000031821	GINS2	2.304	1.8763e-22
ENSMUSG00000031870	PGR	4.946	1.83295e-05
ENSMUSG00000031877	CES2G	3.496	2.42939e-05
ENSMUSG00000031883	CAR7	3.946	6.08453e-39
ENSMUSG00000031948	KARS	1.432	2.13869e-12
ENSMUSG00000031951	TMEM231	1.468	7.01888e-06
ENSMUSG00000031974	ABCB10	2.405	9.91159e-12
ENSMUSG00000031996	APLP2	1.23	7.29496e-06
ENSMUSG00000032014	OAF	2.142	5.27017e-08
ENSMUSG00000032024	CLMP	-2.814	0.00785313
ENSMUSG00000032051	FDX1	2.036	3.40866e-17
ENSMUSG00000032076	CADM1	5.506	3.57194e-17
ENSMUSG00000032101	DDX25	-1.495	0.0212332
ENSMUSG00000032113	CHEK1	1.881	4.87309e-06
ENSMUSG00000032131	ABCG4	3.176	6.03349e-06
ENSMUSG00000032174	ICAM5	2.255	6.2137e-08
ENSMUSG00000032204	AQP9	1.28	0.0390522
ENSMUSG00000032218	CCNB2	1.782	0.0411942
ENSMUSG00000032221	MNS1	2.06	7.15452e-10
ENSMUSG00000032279	IDH3A	1.092	5.80848e-08
ENSMUSG00000032300	1700017B05RIK	1.404	5.35279e-13
ENSMUSG00000032344	CGAS	1.292	4.99271e-06
ENSMUSG00000032369	PLSCR1	1.351	0.0233744
ENSMUSG00000032374	PLOD2	2.864	1.80096e-11
ENSMUSG00000032377	PLSCR4	2.379	3.96008e-05
ENSMUSG00000032397	TIPIN	1.688	4.19211e-12
ENSMUSG00000032478	NME6	1.026	0.000113672
ENSMUSG00000032547	RYK	2.303	6.26102e-06
ENSMUSG00000032558	NPHP3	-1.1	0.000672104
ENSMUSG00000032578	CISH	1.633	0.000100627
ENSMUSG00000032609	KLHDC8B	2.577	1.53957e-12
ENSMUSG00000032783	TROAP	2.79	9.99218e-09
ENSMUSG00000032815	FANCA	1.393	5.13173e-08
ENSMUSG00000032826	ANK2	5.923	3.39924e-07
ENSMUSG00000033007	ASIC4	6.344	1.08261e-15
ENSMUSG00000033031	CIP2A	2.098	4.25505e-09
ENSMUSG00000033065	PFKM	1.96	1.14073e-07
ENSMUSG00000033256	SHF	1.976	7.68692e-23
ENSMUSG00000033386	FRRS1	1.073	8.42088e-07
ENSMUSG00000033697	ARHGAP39	1.001	0.000812662
ENSMUSG00000033717	ADRA2A	2.221	0.000957767
ENSMUSG00000033762	RECQL4	2.067	8.05675e-10
ENSMUSG00000033847	PLA2G4C	1.891	0.00267329
ENSMUSG00000033952	ASPM	2.435	3.63231e-06
ENSMUSG00000033960	JCAD	2.361	0.00129563
ENSMUSG00000033970	RFC3	1.216	2.39761e-06
ENSMUSG00000034101	CTNND1	1.031	0.0328417
ENSMUSG00000034109	GOLIM4	1.411	6.4321e-16
ENSMUSG00000034175	RHBDD3	1.557	9.24238e-16
ENSMUSG00000034206	POLQ	1.741	1.33251e-13
ENSMUSG00000034311	KIF4	2.288	0.0108858
ENSMUSG00000034329	BRIP1	2.07	3.06218e-05
ENSMUSG00000034424	GCSH	1.082	2.23139e-06
ENSMUSG00000034462	PKD2	1.469	0.000520399
ENSMUSG00000034764	1700006J14RIK	2.51	0.00370139
ENSMUSG00000034773	BC030867	3.85	1.68565e-09
ENSMUSG00000034796	CPNE7	2.913	7.35559e-15
ENSMUSG00000034825	NRIP3	4.102	3.01067e-10
ENSMUSG00000034867	ANKRD27	1.115	2.05491e-12
ENSMUSG00000034883	LRR1	3.479	0.000813766
ENSMUSG00000034906	NCAPH	2.98	1.07574e-33
ENSMUSG00000034957	CEBPA	-1.225	0.0102938
ENSMUSG00000034990	OTOA	1.871	0.000871588
ENSMUSG00000034997	HTR2A	3.018	0.00157338
ENSMUSG00000035064	EEF2K	1.496	1.82737e-14
ENSMUSG00000035198	TUBG1	1.03	2.30513e-05
ENSMUSG00000035378	SHQ1	1.156	5.79003e-05
ENSMUSG00000035413	TMEM98	3.392	0.000277997
ENSMUSG00000035455	FIGNL1	3.285	1.10134e-35
ENSMUSG00000035458	TNNI3	3.18	8.93828e-13
ENSMUSG00000035594	CHRNA5	4.037	2.06487e-06
ENSMUSG00000035891	CERK	-1.008	0.0421587
ENSMUSG00000035914	CD276	2.06	1.57297e-07
ENSMUSG00000035936	ALDH5A1	2.74	5.8979e-14
ENSMUSG00000035960	APEX1	1.025	0.000232989
ENSMUSG00000035969	RUSC2	1.479	0.0376741
ENSMUSG00000036136	FAM110C	3.054	6.57636e-05
ENSMUSG00000036158	PRICKLE1	2.152	0.000576442
ENSMUSG00000036172	CD200R3	1.446	0.00986329
ENSMUSG00000036185	SAPCD1	3.597	1.95225e-20
ENSMUSG00000036223	SKA1	3.828	1.01288e-07
ENSMUSG00000036249	RBM43	1.015	9.69053e-09
ENSMUSG00000036381	P2RY14	1.962	6.05279e-07
ENSMUSG00000036473	TBC1D24	2.424	9.49195e-13
ENSMUSG00000036620	MGAT4B	1.464	8.86822e-06
ENSMUSG00000036639	NUDT1	1.154	3.74832e-07
ENSMUSG00000036676	TMTC3	1.593	5.83151e-08
ENSMUSG00000036718	MICALL2	2.152	0.0172471
ENSMUSG00000036768	KIF15	2.271	0.00149738
ENSMUSG00000036777	ANLN	2.286	0.00222185
ENSMUSG00000036781	RPS27L	1.128	4.54219e-06
ENSMUSG00000036814	SLC6A20A	4.367	1.72529e-06
ENSMUSG00000036863	SYDE2	2.254	1.77218e-10
ENSMUSG00000036882	ARHGAP33	1.801	1.71258e-09
ENSMUSG00000037010	APLN	-1.608	0.0188003
ENSMUSG00000037020	WDR62	1.181	1.94062e-08
ENSMUSG00000037031	TSPAN15	3.707	1.29719e-06
ENSMUSG00000037225	FGF2	2.691	0.000319807
ENSMUSG00000037278	TMEM97	1.665	1.29437e-11
ENSMUSG00000037313	TACC3	1.654	2.2629e-15
ENSMUSG00000037406	HTRA4	-1.742	0.0487943
ENSMUSG00000037451	SLC22A20	-4.053	0.00384055
ENSMUSG00000037474	DTL	3.519	4.13933e-22
ENSMUSG00000037482	ERV3	3.311	0.00613623
ENSMUSG00000037499	NENF	1.404	1.70422e-08
ENSMUSG00000037544	DLGAP5	1.799	1.0243e-11
ENSMUSG00000037572	WDHD1	1.23	5.69986e-13
ENSMUSG00000037710	CISD1	1.732	1.79025e-18
ENSMUSG00000037725	CKAP2	2.769	4.46043e-08
ENSMUSG00000037904	ANKRD9	1.371	1.47081e-09
ENSMUSG00000037905	BRI3BP	1.121	8.72593e-10
ENSMUSG00000038005	HPF1	1.162	1.81753e-08
ENSMUSG00000038102	TRAPPC11	1.032	2.83235e-14
ENSMUSG00000038143	STOX2	4.699	2.02902e-19
ENSMUSG00000038227	HOXA9	3.913	1.28844e-05
ENSMUSG00000038236	HOXA7	4.792	6.18728e-34
ENSMUSG00000038252	NCAPD2	1.727	1.20504e-24
ENSMUSG00000038253	HOXA5	3.716	3.51985e-15
ENSMUSG00000038349	PLCL1	1.014	0.00107784
ENSMUSG00000038379	TTK	2.948	1.63322e-06
ENSMUSG00000038482	TFDP1	1.531	3.83042e-12
ENSMUSG00000038604	RIPOR1	1.57	7.65663e-10
ENSMUSG00000038670	MYBPC2	-1.486	0.00671201
ENSMUSG00000038725	PKHD1L1	2.911	0.00318461
ENSMUSG00000038763	ALPK3	-1.048	0.030167
ENSMUSG00000038793	LEFTY1	2.349	5.4275e-08
ENSMUSG00000038936	SCCPDH	2.763	3.20549e-24
ENSMUSG00000038943	PRC1	1.825	0.0217556
ENSMUSG00000038982	BLOC1S5	1.281	5.97562e-09
ENSMUSG00000038997	ASB17	4.969	4.57059e-11
ENSMUSG00000039037	ST6GALNAC5	3.945	3.64504e-09
ENSMUSG00000039055	EME1	2.338	5.89581e-10
ENSMUSG00000039067	PSMD7	1.002	2.07294e-09
ENSMUSG00000039103	NEXN	3.728	0.000166637
ENSMUSG00000039115	ITGA9	3.759	1.02819e-31
ENSMUSG00000039187	FANCI	1.469	3.42942e-09
ENSMUSG00000039197	ADK	1.314	1.43583e-05
ENSMUSG00000039308	NDST2	1.936	8.53104e-17
ENSMUSG00000039396	NEIL3	3.027	1.0753e-08
ENSMUSG00000039481	NRTN	2.875	0.000329539
ENSMUSG00000039512	UHRF1BP1	1.575	2.09238e-20
ENSMUSG00000039640	MRPL12	1.086	1.12396e-05
ENSMUSG00000039713	PLEKHG5	1.348	9.4391e-09
ENSMUSG00000039715	WDR34	1.648	1.30301e-08
ENSMUSG00000039735	FNBP1L	2.165	0.00446998
ENSMUSG00000039741	BAHCC1	3.262	1.19192e-33
ENSMUSG00000039748	EXO1	2.614	1.60091e-31
ENSMUSG00000039787	CERCAM	1.543	0.0161979
ENSMUSG00000039824	MYL6B	1.257	0.0265665
ENSMUSG00000039943	PLCB4	1.521	0.0353303
ENSMUSG00000039994	TIMELESS	1.015	2.90888e-07
ENSMUSG00000040016	PTGER3	2.274	0.00395402
ENSMUSG00000040183	ANKRD6	3.265	6.03291e-16
ENSMUSG00000040189	CCDC114	1.389	3.86141e-06
ENSMUSG00000040204	PCLAF	3.209	3.95381e-14
ENSMUSG00000040265	DNM3	1.199	0.0492067
ENSMUSG00000040269	MRPS28	1.06	4.45969e-06
ENSMUSG00000040274	CDK6	1.384	1.22506e-05
ENSMUSG00000040312	CCHCR1	1.619	2.58671e-14
ENSMUSG00000040354	MARS	1.029	2.07115e-09
ENSMUSG00000040415	DTX3	1.176	8.47824e-08
ENSMUSG00000040488	LTBP4	4.161	3.98126e-14
ENSMUSG00000040495	CHRM4	3.125	1.08991e-05
ENSMUSG00000040621	GEMIN8	1.423	8.54247e-05
ENSMUSG00000040732	ERG	2.733	4.84077e-09
ENSMUSG00000040855	REPS2	2.406	0.00311741
ENSMUSG00000040918	SLC19A2	1.142	4.77555e-07
ENSMUSG00000040957	CABLES1	1.748	0.000183951
ENSMUSG00000040998	NPNT	4.958	2.377e-16
ENSMUSG00000041064	PIF1	2.859	6.51803e-08
ENSMUSG00000041134	CYYR1	4.14	3.55439e-05
ENSMUSG00000041147	BRCA2	1.218	2.41054e-07
ENSMUSG00000041237	PKLR	6.607	1.89838e-06
ENSMUSG00000041261	CAR8	3.44	0.00066427
ENSMUSG00000041287	SOX15	1.341	0.0289029
ENSMUSG00000041329	ATP1B2	3.393	1.90671e-07
ENSMUSG00000041406	BC055324	1.739	3.75736e-17
ENSMUSG00000041431	CCNB1	2.957	2.33802e-16
ENSMUSG00000041598	CDC42EP4	1.101	0.000113266
ENSMUSG00000041859	MCM3	1.753	1.14018e-25
ENSMUSG00000041936	AGRN	1.638	9.36114e-08
ENSMUSG00000041984	RPTN	5.361	0.0224738
ENSMUSG00000042029	NCAPG2	2.384	4.7287e-15
ENSMUSG00000042050	WDR60	1.567	7.30273e-06
ENSMUSG00000042106	INKA1	1.355	0.0353541
ENSMUSG00000042155	KLHL23	3.141	6.99696e-13
ENSMUSG00000042210	ABHD14A	1.064	3.15581e-06
ENSMUSG00000042215	BAG2	2.899	2.22538e-18
ENSMUSG00000042225	AMMECR1	1.106	7.51597e-08
ENSMUSG00000042289	HSD3B7	1.965	1.08018e-10
ENSMUSG00000042453	RELN	1.785	0.0312635
ENSMUSG00000042462	DCTPP1	1.803	5.93643e-15
ENSMUSG00000042489	CLSPN	3.071	3.42835e-06
ENSMUSG00000042498	D330045A20RIK	4.05	2.18087e-07
ENSMUSG00000042660	WDR55	1.014	6.86764e-06
ENSMUSG00000042680	GAREM1	2.994	0.00519627
ENSMUSG00000042684	NPL	3.166	1.32439e-10
ENSMUSG00000042712	TCEAL9	2.132	9.83532e-14
ENSMUSG00000042751	NMNAT2	4.245	3.84788e-32
ENSMUSG00000042842	SERPINB6B	1.846	3.25097e-08
ENSMUSG00000043051	DISC1	2.209	7.11367e-13
ENSMUSG00000043099	HIC1	1.601	0.000184249
ENSMUSG00000043153	ISPD	1.484	6.7955e-05
ENSMUSG00000043219	HOXA6	4.412	1.11212e-11
ENSMUSG00000043252	TMEM64	1.078	1.44382e-09
ENSMUSG00000043419	RNF227	1.005	0.00545809
ENSMUSG00000043541	CASC1	-1.216	0.012367
ENSMUSG00000043592	UNC5CL	1.635	3.36062e-14
ENSMUSG00000043635	ADAMTS3	3.766	2.13252e-11
ENSMUSG00000043639	RBM20	2.786	4.08122e-05
ENSMUSG00000043822	ADAMTSL5	3.187	0.00108671
ENSMUSG00000043940	WDFY3	1.193	0.00371663
ENSMUSG00000043969	EMX2	7.149	9.45036e-07
ENSMUSG00000043993	2900052L18RIK	3.104	3.12897e-10
ENSMUSG00000044005	GLS2	3.384	3.47446e-05
ENSMUSG00000044026	SLC35G1	2.215	5.40813e-13
ENSMUSG00000044056	EFCAB9	-1.176	0.00401365
ENSMUSG00000044201	CDC25C	2.796	0.000137871
ENSMUSG00000044220	NKX2-3	5.512	2.57846e-07
ENSMUSG00000044303	CDKN2A	1.9	0.0349479
ENSMUSG00000044433	CAMSAP3	2.372	0.0157668
ENSMUSG00000044453	FFAR1	-1.22	0.0190341
ENSMUSG00000044694	2010007H06RIK	-1.112	0.0299688
ENSMUSG00000044734	SERPINB1A	1.186	0.000157091
ENSMUSG00000044934	ZFP367	1.255	3.24762e-11
ENSMUSG00000044966	FBXO48	1.453	1.01916e-08
ENSMUSG00000045031	CETN4	1.693	0.00805155
ENSMUSG00000045053	KCNG3	3.408	3.23688e-06
ENSMUSG00000045095	MAGI1	3.101	0.00125545
ENSMUSG00000045216	HS6ST1	1.141	2.58334e-05
ENSMUSG00000045273	CENPH	3.06	1.37119e-07
ENSMUSG00000045328	CENPE	2.26	2.92278e-07
ENSMUSG00000045509	GPR150	3.199	6.20265e-10
ENSMUSG00000045608	DBX2	4.882	3.15602e-06
ENSMUSG00000045667	SMTNL2	3.681	2.36506e-08
ENSMUSG00000045730	ADRB2	-1.131	0.00306484
ENSMUSG00000045751	MMS22L	1.322	9.03307e-07
ENSMUSG00000045838	CCDC9B	2.809	2.35473e-08
ENSMUSG00000046152	FUT10	1.828	0.0051587
ENSMUSG00000046159	CHRM3	-2.052	0.0211146
ENSMUSG00000046179	E2F8	2.51	6.98134e-18
ENSMUSG00000046295	ANKLE1	1.731	0.0034587
ENSMUSG00000046337	FAM178B	4.917	1.05891e-08
ENSMUSG00000046432	BEX3	1.747	1.34215e-11
ENSMUSG00000046442	PPM1E	1.293	0.0017928
ENSMUSG00000046567	4930430F08RIK	1.594	9.33014e-12
ENSMUSG00000046572	ZFP518B	-1.011	0.0115421
ENSMUSG00000046591	TICRR	2.685	2.34701e-08
ENSMUSG00000046959	SLC26A1	2.49	0.000276968
ENSMUSG00000047003	ZFP41	1.103	2.08979e-06
ENSMUSG00000047361	GM973	1.221	0.0487936
ENSMUSG00000047369	DNAH14	4.266	0.0392372
ENSMUSG00000047394	ODF3B	4.007	4.16426e-13
ENSMUSG00000047409	CTDSPL	1.462	0.00766914
ENSMUSG00000047443	ERFE	3.553	2.14118e-07
ENSMUSG00000047557	LXN	2.843	8.09344e-12
ENSMUSG00000047604	FRAT2	1.024	1.05614e-05
ENSMUSG00000047631	APOF	-1.722	0.0107014
ENSMUSG00000047671	TCTEX1D4	-1.934	0.000359666
ENSMUSG00000047844	BEX4	3.578	0.00160227
ENSMUSG00000048078	TENM4	3.518	3.10592e-33
ENSMUSG00000048217	NAGS	6.94	4.80998e-17
ENSMUSG00000048218	AMIGO2	2.155	1.43932e-14
ENSMUSG00000048327	CKAP2L	2.049	0.00620139
ENSMUSG00000048442	SMIM5	2.733	2.14809e-18
ENSMUSG00000048458	INKA2	2.666	2.4556e-16
ENSMUSG00000048503	TMEM136	1.439	0.0138981
ENSMUSG00000048537	PHLDB1	2.686	3.82029e-17
ENSMUSG00000048612	MYOF	-1.026	0.0478212
ENSMUSG00000048652	SAMD13	1.771	0.000367791
ENSMUSG00000048794	CFAP100	3.66	2.9629e-06
ENSMUSG00000048814	LONRF2	3.902	6.65283e-05
ENSMUSG00000048922	CDCA2	2.473	7.66584e-18
ENSMUSG00000049285	MBLAC1	1.202	0.000419072
ENSMUSG00000049350	ZG16	3.973	2.24043e-06
ENSMUSG00000049404	RARRES1	4.129	1.83295e-05
ENSMUSG00000049539	HIST1H1A	3.378	4.79764e-23
ENSMUSG00000049687	PHETA2	2.623	4.97853e-13
ENSMUSG00000049791	FZD4	-1.165	0.049456
ENSMUSG00000049932	H2AFX	1.922	1.30937e-12
ENSMUSG00000050382	KIF7	1.926	3.4829e-07
ENSMUSG00000050390	C77080	2.762	0.00296155
ENSMUSG00000050410	TCF19	1.724	3.88381e-12
ENSMUSG00000050534	HTR5B	6.91	2.29331e-20
ENSMUSG00000050549	FAM241A	1.076	8.95955e-05
ENSMUSG00000051147	NAT2	1.034	1.90587e-05
ENSMUSG00000051159	CITED1	5.078	2.32802e-06
ENSMUSG00000051220	ERCC6L	1.501	1.55528e-10
ENSMUSG00000051235	GEN1	1.106	9.2055e-05
ENSMUSG00000051236	MSRB3	3.007	1.05706e-05
ENSMUSG00000051278	ZGRF1	1.077	4.11253e-07
ENSMUSG00000051319	MTLN	1.445	3.74797e-08
ENSMUSG00000051378	KIF18B	3.225	4.2273e-07
ENSMUSG00000051444	BBS12	1.087	2.60427e-05
ENSMUSG00000051517	ARHGEF39	2.014	1.19006e-16
ENSMUSG00000051590	MAP3K19	-1.052	0.0358145
ENSMUSG00000051627	HIST1H1E	1.687	3.20954e-05
ENSMUSG00000051804	ADAM6B	-1.211	0.032364
ENSMUSG00000051817	SOX12	2.112	2.15817e-16
ENSMUSG00000051950	B3GLCT	1.283	1.54414e-08
ENSMUSG00000052373	MPP3	4.117	0.000353821
ENSMUSG00000052392	ACOT4	2.722	0.031884
ENSMUSG00000052512	NAV2	1.73	4.92136e-09
ENSMUSG00000052565	HIST1H1D	3.092	2.4556e-16
ENSMUSG00000052926	RNASEH2A	1.017	8.70516e-11
ENSMUSG00000052955	CPVL	6.074	1.95613e-15
ENSMUSG00000053121	GM5129	-1.908	0.0198134
ENSMUSG00000053198	PRX	1.488	0.000290352
ENSMUSG00000053702	NEBL	1.503	0.00409321
ENSMUSG00000053897	SLC39A8	3.112	2.7683e-06
ENSMUSG00000054181	A930012O16RIK	-1.014	0.0280802
ENSMUSG00000054191	KLF1	4.195	1.50112e-07
ENSMUSG00000054342	KCNN4	1.122	7.29496e-06
ENSMUSG00000054408	SPCS3	1.022	5.75977e-09
ENSMUSG00000054640	SLC8A1	1.049	0.000445045
ENSMUSG00000054672	5830411N06RIK	-1.09	0.0373288
ENSMUSG00000054717	HMGB2	1.508	8.9238e-05
ENSMUSG00000054932	AFP	-1.185	0.0122246
ENSMUSG00000055184	FAM72A	1.232	0.00299135
ENSMUSG00000055210	FOXD2	1.645	8.93559e-09
ENSMUSG00000055312	THEM7	5.806	6.06788e-18
ENSMUSG00000055485	SOGA1	1.166	0.000240164
ENSMUSG00000055538	ZCCHC24	-1.003	0.00269991
ENSMUSG00000055612	CDCA7	2.575	9.18803e-38
ENSMUSG00000055745	RTL6	-1.024	0.00252939
ENSMUSG00000056043	RGS9BP	2.096	0.00149492
ENSMUSG00000056367	ACTR3B	3.973	4.88952e-39
ENSMUSG00000056394	LIG1	2.129	1.25127e-31
ENSMUSG00000056399	PRSS34	-2.266	0.0340341
ENSMUSG00000056612	PPP1R14B	1.098	1.51351e-06
ENSMUSG00000056666	RETSAT	2.303	1.4371e-22
ENSMUSG00000056671	PRELID2	2.456	1.63399e-08
ENSMUSG00000056904	GM5620	1.745	0.000813766
ENSMUSG00000056947	MAB21L1	6.672	0.000208541
ENSMUSG00000057777	MAB21L2	6.502	3.24606e-30
ENSMUSG00000058385	HIST1H2BG	2.606	1.31872e-27
ENSMUSG00000058773	HIST1H1B	4.008	1.12605e-28
ENSMUSG00000059027	9630013D21RIK	2.696	1.36854e-10
ENSMUSG00000059060	RAD51B	1.981	8.11662e-06
ENSMUSG00000059363	FXN	1.296	2.74605e-12
ENSMUSG00000059493	NHS	2.464	0.000517103
ENSMUSG00000059689	ZFP637	1.157	3.77941e-08
ENSMUSG00000060002	CHPT1	1.036	0.00327913
ENSMUSG00000060093	HIST1H4A	2.925	1.16096e-25
ENSMUSG00000060678	HIST1H4C	2.047	3.39185e-13
ENSMUSG00000060981	HIST1H4H	1.986	1.11201e-08
ENSMUSG00000061013	MKX	4.286	0.000358241
ENSMUSG00000061311	RAG1	1.513	0.0247251
ENSMUSG00000061356	NUGGC	-1.813	0.0215548
ENSMUSG00000061482	HIST1H4D	2.249	4.62145e-17
ENSMUSG00000061615	HIST1H2AB	3.374	4.08015e-23
ENSMUSG00000061878	SPHK1	3.321	0.0299688
ENSMUSG00000061991	HIST1H2AF	3.561	9.79306e-14
ENSMUSG00000062028	IRGC1	-1.542	0.00209736
ENSMUSG00000062046	5730460C07RIK	2.006	0.0158728
ENSMUSG00000062082	CD200R4	1.64	1.29273e-06
ENSMUSG00000062190	LANCL2	1.39	5.31966e-15
ENSMUSG00000062248	CKS2	1.647	0.000246376
ENSMUSG00000062510	NSL1	1.997	2.8708e-16
ENSMUSG00000062661	NCS1	3.699	1.22895e-15
ENSMUSG00000062727	HIST1H2BK	3.904	3.79304e-22
ENSMUSG00000062729	PPOX	1.33	2.67933e-12
ENSMUSG00000063021	HIST1H2AK	3.202	1.23457e-31
ENSMUSG00000063445	NMRAL1	1.814	6.7134e-12
ENSMUSG00000063689	HIST2H2AB	2.355	1.82099e-08
ENSMUSG00000063810	ALMS1	1.32	0.00347157
ENSMUSG00000064032	GM10143	1.183	0.0251994
ENSMUSG00000064168	NA	3.36	5.65536e-26
ENSMUSG00000064288	HIST1H4K	3.371	5.80971e-28
ENSMUSG00000064326	SIVA1	1.323	4.38938e-08
ENSMUSG00000066191	ANKS6	2.274	0.0119308
ENSMUSG00000066197	GPR139	6.74	1.5446e-14
ENSMUSG00000066643	WDR35	1.718	1.10581e-07
ENSMUSG00000066894	VSIG10	1.813	5.79003e-05
ENSMUSG00000067336	BMPR2	1.025	0.00387037
ENSMUSG00000067341	H2-EB2	-1.022	0.021302
ENSMUSG00000067455	HIST1H4J	3.162	4.7646e-21
ENSMUSG00000067629	SYNGAP1	2.228	9.51685e-15
ENSMUSG00000068079	TCF15	6.577	1.89119e-12
ENSMUSG00000068101	CENPM	2.963	2.20728e-18
ENSMUSG00000068115	NINL	2.901	0.000282509
ENSMUSG00000068417	PNP2	1.915	0.00214871
ENSMUSG00000068744	PSRC1	2.358	4.87309e-06
ENSMUSG00000068855	HIST2H2AC	1.756	9.67185e-09
ENSMUSG00000068874	SELENBP1	1.96	0.0138709
ENSMUSG00000069265	HIST1H3A	2.718	5.4622e-19
ENSMUSG00000069266	HIST1H4B	3.3	6.78634e-16
ENSMUSG00000069267	HIST1H3B	3.67	1.86322e-10
ENSMUSG00000069268	HIST1H2BF	2.401	8.50301e-12
ENSMUSG00000069272	HIST1H2AE	3.115	7.68692e-23
ENSMUSG00000069273	HIST1H3E	1.941	3.09449e-10
ENSMUSG00000069274	HIST1H4F	3.703	1.64929e-29
ENSMUSG00000069300	HIST1H2BJ	2.889	8.79259e-14
ENSMUSG00000069301	HIST1H2AG	3.562	2.06501e-17
ENSMUSG00000069302	HIST1H2AH	4.099	8.17915e-15
ENSMUSG00000069308	HIST1H2BP	2.475	0.00198786
ENSMUSG00000069309	HIST1H2AN	3.342	3.41813e-20
ENSMUSG00000069310	HIST1H3C	4.13	5.50117e-24
ENSMUSG00000069713	4933406P04RIK	-1.015	0.0190899
ENSMUSG00000069910	SPDL1	1.738	2.32351e-11
ENSMUSG00000070392	GM20634	-1.031	0.0348922
ENSMUSG00000070576	MN1	3.523	4.9373e-13
ENSMUSG00000070730	RMDN3	1.807	4.90462e-28
ENSMUSG00000070803	CITED4	2.694	5.28206e-05
ENSMUSG00000070823	NA	-1.104	0.0123141
ENSMUSG00000070980	ACTL7B	-2.427	0.0238123
ENSMUSG00000071478	HIST1H2AD	2.435	8.24573e-13
ENSMUSG00000071516	HIST1H2AI	2.422	2.12289e-10
ENSMUSG00000071547	NT5DC2	2.226	5.85553e-06
ENSMUSG00000071636	RIMBP3	2.311	2.50469e-07
ENSMUSG00000071648	ROM1	2.526	5.96245e-21
ENSMUSG00000071714	CSF2RB2	1.212	0.0464463
ENSMUSG00000071722	SPIN4	4.464	6.07105e-09
ENSMUSG00000072082	CCNF	2.307	1.74296e-10
ENSMUSG00000072673	GM10392	-1.218	0.00871839
ENSMUSG00000072980	OIP5	2.045	0.0107698
ENSMUSG00000073002	VAMP5	2.933	3.60887e-50
ENSMUSG00000073295	NUDT11	4.157	9.8847e-06
ENSMUSG00000073705	CENPS	1.044	0.000992563
ENSMUSG00000074039	4930520O04RIK	2.384	6.48637e-07
ENSMUSG00000074203	G430095P16RIK	1.211	7.89405e-06
ENSMUSG00000074227	SPINT2	1.062	0.0236592
ENSMUSG00000074403	HIST2H3B	2.423	2.06384e-11
ENSMUSG00000074476	SPC24	2.176	0.0102491
ENSMUSG00000074682	ZCCHC3	1.265	7.6953e-06
ENSMUSG00000074867	ZFP808	1.594	8.83588e-05
ENSMUSG00000074896	IFIT3	-1.03	0.0316598
ENSMUSG00000074899	SPTBN5	-1.338	0.0109834
ENSMUSG00000074923	PAK6	2.454	6.94156e-08
ENSMUSG00000075029	4930558J22RIK	3.462	1.29553e-12
ENSMUSG00000075031	HIST1H2BB	3.396	2.80395e-31
ENSMUSG00000075266	CENPW	2.525	2.32711e-14
ENSMUSG00000075289	CARNS1	-1.106	0.00204771
ENSMUSG00000075334	RPRM	5.519	2.90361e-13
ENSMUSG00000075394	HOXC4	8.247	1.24765e-18
ENSMUSG00000075420	SMIM6	1.991	4.92497e-05
ENSMUSG00000075590	NRBP2	3.142	1.10058e-07
ENSMUSG00000076522	IGKV16-104	-1.176	0.0239435
ENSMUSG00000076548	IGKV4-69	-1.34	0.0457675
ENSMUSG00000076695	IGHV1-18	-1.182	0.0349532
ENSMUSG00000078350	SMIM1	3.067	7.03898e-05
ENSMUSG00000078451	PPIL6	-1.906	0.0386081
ENSMUSG00000078486	PERM1	1.036	0.00798655
ENSMUSG00000078521	AUNIP	3.824	1.5065e-17
ENSMUSG00000078812	EIF5A	1.242	5.75882e-13
ENSMUSG00000078870	GM14410	1.534	0.000298639
ENSMUSG00000079553	KIFC1	1.731	0.00150118
ENSMUSG00000079560	HOXA3	3.322	5.38972e-11
ENSMUSG00000079654	PRRT4	4.143	7.96995e-11
ENSMUSG00000079685	ULBP1	1.587	1.76783e-08
ENSMUSG00000080712	HIST3H2BB-PS	1.969	2.46539e-11
ENSMUSG00000081511	GM11475	-5.252	0.00825666
ENSMUSG00000081564	GM13717	3.325	4.27748e-07
ENSMUSG00000081603	GM14681	1.082	0.0054809
ENSMUSG00000082057	GM15789	-1.605	0.0354916
ENSMUSG00000082163	GM14276	1.043	0.00569425
ENSMUSG00000084821	GM15880	-1.46	0.022764
ENSMUSG00000085167	GM12063	1.188	0.0328417
ENSMUSG00000085204	GM15327	-1.735	0.00720132
ENSMUSG00000085399	FOXD2OS	1.771	1.45371e-15
ENSMUSG00000085558	4930412C18RIK	2.201	0.0135497
ENSMUSG00000085583	NA	2.659	3.55745e-05
ENSMUSG00000085666	GM9855	3.324	6.8642e-08
ENSMUSG00000085704	4921531C22RIK	-1.326	0.00814682
ENSMUSG00000085723	GM15915	3.282	0.00108458
ENSMUSG00000085918	GM13032	2.352	1.90651e-08
ENSMUSG00000086015	4833417C18RIK	1.2	1.93715e-05
ENSMUSG00000086111	GM15326	-1.317	0.0140397
ENSMUSG00000086119	GM2415	1.637	0.00150251
ENSMUSG00000086212	MKLN1OS	1.382	0.000609633
ENSMUSG00000086245	GM16170	-1.243	0.0299688
ENSMUSG00000086344	NA	-1.314	0.0420675
ENSMUSG00000086360	GM16214	-1.645	0.00536118
ENSMUSG00000086424	GM15569	-1.71	0.0142527
ENSMUSG00000086448	9330162012RIK	2.101	0.0477012
ENSMUSG00000086449	9030204H09RIK	4.903	3.49295e-07
ENSMUSG00000086451	4933431K23RIK	3.793	8.73362e-05
ENSMUSG00000086560	GM13372	2.823	0.00513718
ENSMUSG00000086605	NA	-1.147	0.0368653
ENSMUSG00000086712	AI427809	1.782	0.00188658
ENSMUSG00000087221	BC037032	-1.284	0.0013067
ENSMUSG00000087266	GM15991	-1.269	0.0115711
ENSMUSG00000087443	PPP1R18OS	-1.264	0.00512172
ENSMUSG00000087593	GM16174	-1.841	0.0117236
ENSMUSG00000087598	ZFP111	1.022	0.0302387
ENSMUSG00000089746	GM3513	2.15	0.0276985
ENSMUSG00000089766	GM16538	1.44	0.0129321
ENSMUSG00000089789	RDH1	-1.736	0.0175958
ENSMUSG00000090622	A930033H14RIK	2.194	4.34313e-06
ENSMUSG00000090812	SAMD15	-1.121	0.0384052
ENSMUSG00000091405	HIST2H4	2.389	4.02488e-15
ENSMUSG00000091577	GM6211	3.705	2.83798e-05
ENSMUSG00000092074	DYNLT1A	1.325	0.00157061
ENSMUSG00000092250	GM20467	5.136	3.99792e-05
ENSMUSG00000092415	GM20513	-1.714	0.0166241
ENSMUSG00000093656	GM20628	2.37	1.64662e-14
ENSMUSG00000093859	GM7882	-2.787	0.0184569
ENSMUSG00000094338	HIST1H2BL	3.435	3.9074e-24
ENSMUSG00000094840	MUC3A	-1.113	0.0239696
ENSMUSG00000095007	IGKV12-41	-1.263	0.0198134
ENSMUSG00000095351	IGKV3-2	-1.194	0.0495218
ENSMUSG00000095583	IGHV14-2	-1.026	0.0447817
ENSMUSG00000095700	IGHV10-3	-1.115	0.0295532
ENSMUSG00000095789	NUPR1L	-1.284	0.00460482
ENSMUSG00000095889	IGHV1-58	-2.145	1.73428e-05
ENSMUSG00000096010	HIST4H4	2.072	8.66265e-17
ENSMUSG00000096410	IGHV1-19	-1.224	0.0293333
ENSMUSG00000096461	IGKV14-130	-1.555	0.02669
ENSMUSG00000096498	IGHV2-5	-1.243	0.0157895
ENSMUSG00000096807	NA	3.983	6.47371e-30
ENSMUSG00000097039	PVT1	1.13	1.23337e-08
ENSMUSG00000097069	GM16998	-1.351	0.0261234
ENSMUSG00000097080	1700086O06RIK	1.994	6.68321e-11
ENSMUSG00000097109	GM26580	-1.759	0.0137986
ENSMUSG00000097120	GM26887	-2.392	0.00178563
ENSMUSG00000097142	GM26778	-1.265	0.0107801
ENSMUSG00000097150	GM26513	1.691	2.01797e-07
ENSMUSG00000097233	GM17552	-1.216	0.0387805
ENSMUSG00000097316	GM10516	1.83	2.23284e-06
ENSMUSG00000097402	GM17399	1.092	0.0250575
ENSMUSG00000097416	GM26670	-1.591	0.0226193
ENSMUSG00000097440	GM6277	2.302	0.0217946
ENSMUSG00000097519	4930558J18RIK	1.232	0.0127637
ENSMUSG00000097569	GM26640	-1.633	0.0306114
ENSMUSG00000097577	6230400D17RIK	-1.115	0.00802996
ENSMUSG00000097614	GM26508	-1.058	0.030073
ENSMUSG00000097922	NA	6.917	1.27113e-12
ENSMUSG00000098090	2700099C18RIK	1.227	0.000181347
ENSMUSG00000098197	BC051537	1.789	4.13398e-09
ENSMUSG00000098557	KCTD12	-1.108	0.0103229
ENSMUSG00000099474	1700097N02RIK	2.476	9.98473e-11
ENSMUSG00000099517	HIST1H3G	3.609	1.13627e-09
ENSMUSG00000099583	HIST1H3D	2.492	7.09744e-09
ENSMUSG00000099954	GM28112	1.549	0.00603522
ENSMUSG00000100210	HIST1H3F	2.745	7.40719e-21
ENSMUSG00000100615	GM5511	-1.107	0.031875
ENSMUSG00000100625	1700016G22RIK	-2.884	0.048428
ENSMUSG00000100815	GM29112	1.655	0.0104016
ENSMUSG00000101355	HIST1H3H	3.005	2.82696e-17
ENSMUSG00000101581	C430002N11RIK	2.062	1.4266e-05
ENSMUSG00000101823	GM29438	1.882	1.9403e-06
ENSMUSG00000101972	HIST1H3I	2.584	6.07841e-14
ENSMUSG00000102145	GM38056	1.17	0.0288111
ENSMUSG00000102184	GM37192	-1.202	0.0130825
ENSMUSG00000102202	GM33280	3.366	1.99851e-15
ENSMUSG00000102380	GM38140	-1.869	0.0197598
ENSMUSG00000102411	GM36936	1.031	0.0113801
ENSMUSG00000102509	GM37368	1.523	0.00461077
ENSMUSG00000102725	GM37939	-1.555	0.0200363
ENSMUSG00000102727	NA	-1.36	0.0381272
ENSMUSG00000102912	GM20731	-1.396	0.0368786
ENSMUSG00000103105	GM18752	-1.125	0.0414767
ENSMUSG00000103788	GM37527	3.294	0.00054542
ENSMUSG00000103857	GM37249	1.692	0.000176206
ENSMUSG00000104136	GM36955	-1.218	0.0399626
ENSMUSG00000104213	IGHD	-1.123	0.0453359
ENSMUSG00000104273	A530064N14RIK	1.109	0.0238473
ENSMUSG00000104351	GM37125	-1.917	0.0221733
ENSMUSG00000104517	GM18407	-1.933	0.0403026
ENSMUSG00000104735	C130075A20RIK	4.342	0.000238727
ENSMUSG00000104765	GM43058	-2.674	0.0302642
ENSMUSG00000104955	1700016F12RIK	2.992	0.0288111
ENSMUSG00000104994	GM42989	2.66	0.000139754
ENSMUSG00000105072	GM44335	3.219	1.01405e-06
ENSMUSG00000105107	GM43412	-1.167	0.013659
ENSMUSG00000105128	GM42870	-1.114	0.0312635
ENSMUSG00000105345	BC030343	1.154	0.0390967
ENSMUSG00000105580	GM44454	3.022	5.79612e-09
ENSMUSG00000105624	GM43187	2.402	0.000144133
ENSMUSG00000105681	GM43428	2.284	1.4814e-05
ENSMUSG00000105707	GM43753	-1.053	0.0435922
ENSMUSG00000105761	GM43787	1.701	0.0143437
ENSMUSG00000105813	GM42928	-1.457	0.0232482
ENSMUSG00000105827	HIST2H2BB	3.117	4.71969e-33
ENSMUSG00000105926	GM43386	1.531	0.0252416
ENSMUSG00000105985	GM42993	2.025	0.000412111
ENSMUSG00000106049	GM43019	2.852	6.22543e-07
ENSMUSG00000106175	GM44313	1.359	0.0359875
ENSMUSG00000106211	GM42842	2.952	0.0425696
ENSMUSG00000106269	4930580E04RIK	-2.664	0.0258783
ENSMUSG00000106290	GM43429	2.102	3.16253e-05
ENSMUSG00000106320	GM42992	2.057	0.000320834
ENSMUSG00000106384	GM43188	2.83	2.31052e-06
ENSMUSG00000106386	GM42991	2.031	0.000620447
ENSMUSG00000106431	GM44492	1.668	0.00107825
ENSMUSG00000106518	GM42759	-1.629	0.0403026
ENSMUSG00000106570	C230071H17RIK	1.966	0.00282783
ENSMUSG00000106588	GM17590	4.533	6.40626e-10
ENSMUSG00000106664	GM17936	2.609	2.58334e-05
ENSMUSG00000106822	GM43533	1.012	0.0316315
ENSMUSG00000106858	GM43844	1.112	0.0121128
ENSMUSG00000106927	GM43598	-1.625	0.00441222
ENSMUSG00000107195	4930589O11RIK	-1.296	0.0121717
ENSMUSG00000107370	GM43588	1.178	0.0356607

## Sheet: Table S5 c3vsc1_DEG_table
Table S5 c3vsc1_DEG_table
gene	genesym	c3c1_logFC	c3c1_qval
ENSMUSG00000000001	GNAI3	1.016	5.23001e-13
ENSMUSG00000000028	CDC45	2.757	4.27656e-56
ENSMUSG00000000049	APOH	-2.848	0.00495183
ENSMUSG00000000120	NGFR	-1.836	1.06957e-09
ENSMUSG00000000142	AXIN2	1.608	8.83279e-15
ENSMUSG00000000148	BRAT1	1.103	1.3036e-09
ENSMUSG00000000168	DLAT	1.011	1.51826e-15
ENSMUSG00000000171	SDHD	1.363	5.03502e-28
ENSMUSG00000000184	CCND2	1.803	7.59678e-20
ENSMUSG00000000204	SLFN4	-2.498	5.8384e-05
ENSMUSG00000000244	TSPAN32	-1.326	8.64046e-16
ENSMUSG00000000253	GMPR	2.076	0.00160928
ENSMUSG00000000266	MID2	-1.921	0.0208015
ENSMUSG00000000278	SCPEP1	-1.033	1.932e-07
ENSMUSG00000000290	ITGB2	-1.584	7.10457e-05
ENSMUSG00000000301	PEMT	1.623	4.89479e-14
ENSMUSG00000000303	CDH1	-1.286	0.00999468
ENSMUSG00000000308	CKMT1	-2.743	0.0120436
ENSMUSG00000000320	ALOX12	-2.613	0.0030241
ENSMUSG00000000325	ARVCF	1.658	2.87709e-18
ENSMUSG00000000326	COMT	2.769	1.90454e-57
ENSMUSG00000000365	RNF17	-1.809	0.00760182
ENSMUSG00000000384	TBRG4	1.12	4.7595e-13
ENSMUSG00000000385	TMPRSS2	-2.612	0.00428669
ENSMUSG00000000386	MX1	-1.602	4.28906e-07
ENSMUSG00000000399	NDUFA9	1.397	2.09044e-22
ENSMUSG00000000409	LCK	-1.366	6.21329e-07
ENSMUSG00000000416	CTTNBP2	5.287	0.000405303
ENSMUSG00000000531	GRASP	-1.151	1.00488e-07
ENSMUSG00000000532	ACVR1B	1.469	2.88127e-22
ENSMUSG00000000552	ZFP385A	1.495	5.12448e-18
ENSMUSG00000000555	ITGA5	2.16	2.93167e-11
ENSMUSG00000000562	ADORA3	3.435	8.56667e-19
ENSMUSG00000000563	ATP5F1	1.063	2.54842e-11
ENSMUSG00000000567	SOX9	-4.242	0.00381212
ENSMUSG00000000581	C1D	1.375	3.91675e-22
ENSMUSG00000000627	SEMA4F	-1.42	1.30151e-07
ENSMUSG00000000682	CD52	-1.346	3.47674e-07
ENSMUSG00000000693	LOXL3	-1.503	0.0222831
ENSMUSG00000000731	AIRE	-2.29	1.44319e-08
ENSMUSG00000000732	ICOSL	-2.258	1.78131e-19
ENSMUSG00000000751	RPA1	1.481	4.12574e-24
ENSMUSG00000000782	TCF7	-1.403	0.000110719
ENSMUSG00000000869	IL4	3.374	8.70281e-10
ENSMUSG00000000881	DLG3	-1.468	7.69743e-17
ENSMUSG00000000901	MMP11	-1.879	5.84805e-08
ENSMUSG00000000903	VPREB3	-1.324	2.3143e-05
ENSMUSG00000000915	HIP1R	-1.509	3.94643e-13
ENSMUSG00000000938	HOXA10	5.907	4.59139e-05
ENSMUSG00000000957	MMP14	3.772	1.29695e-10
ENSMUSG00000000983	WFDC18	-2.311	0.00113037
ENSMUSG00000001014	ICAM4	3.92	3.07873e-32
ENSMUSG00000001025	S100A6	-1.065	0.0149276
ENSMUSG00000001027	SCN4A	-1.092	2.66929e-05
ENSMUSG00000001039	B9D1	2.824	1.99789e-11
ENSMUSG00000001053	N4BP3	-1.727	6.91743e-15
ENSMUSG00000001056	NHP2	1.597	6.62962e-29
ENSMUSG00000001082	MFSD10	1.515	2.93252e-16
ENSMUSG00000001095	SLC13A2	-3.089	0.000425972
ENSMUSG00000001098	KCTD10	1.086	4.70079e-10
ENSMUSG00000001100	POLDIP2	1.292	4.72694e-19
ENSMUSG00000001120	PCBP3	1.128	2.70911e-10
ENSMUSG00000001123	LGALS9	1.831	6.86238e-29
ENSMUSG00000001156	MXD1	-1.534	0.0018515
ENSMUSG00000001173	OCRL	1.493	2.89276e-06
ENSMUSG00000001228	UHRF1	3.198	1.33362e-32
ENSMUSG00000001247	LSR	-1.133	0.00259306
ENSMUSG00000001248	GRAMD1A	-1.275	4.62395e-09
ENSMUSG00000001249	HPN	3.558	3.48224e-11
ENSMUSG00000001288	RARG	-1.202	8.93206e-05
ENSMUSG00000001313	RND2	2.308	9.6922e-11
ENSMUSG00000001333	SYNC	5.101	1.01454e-09
ENSMUSG00000001366	FBXO9	-1.717	0.0243089
ENSMUSG00000001380	HARS	2.165	4.68822e-82
ENSMUSG00000001416	CCT3	1.544	9.48748e-17
ENSMUSG00000001436	SLC19A1	1.495	1.80348e-21
ENSMUSG00000001467	CYP51	1.317	2.55974e-17
ENSMUSG00000001482	DEF8	1.958	2.91058e-29
ENSMUSG00000001506	COL1A1	-2.446	0.0263746
ENSMUSG00000001507	ITGA3	-1.712	2.02583e-08
ENSMUSG00000001517	FOXM1	2.683	2.98898e-56
ENSMUSG00000001525	TUBB5	1.877	5.00425e-31
ENSMUSG00000001552	JUP	-1.706	0.000344709
ENSMUSG00000001583	TNK1	-2.023	0.0438004
ENSMUSG00000001604	TCEA3	-1.701	6.18715e-06
ENSMUSG00000001672	MARVELD3	-2.533	0.00673188
ENSMUSG00000001700	GRAMD3	-1.438	2.18882e-13
ENSMUSG00000001707	EEF1E1	1.823	2.23923e-28
ENSMUSG00000001741	IL16	-1.641	7.4183e-09
ENSMUSG00000001761	SMO	5.193	4.29983e-38
ENSMUSG00000001768	RIN2	-1.029	0.00282145
ENSMUSG00000001785	PWP1	1.174	1.64397e-13
ENSMUSG00000001827	FOLR1	-1.975	0.0169593
ENSMUSG00000001847	RAC1	-1.554	0.0184681
ENSMUSG00000001865	CPA3	4.874	1.09426e-14
ENSMUSG00000001870	LTBP1	-2.752	0.00113191
ENSMUSG00000001901	KCNH6	-1.462	0.00229181
ENSMUSG00000001910	NACC1	1.068	3.94044e-15
ENSMUSG00000001930	VWF	-2.349	0.00451451
ENSMUSG00000001943	VSIG2	-2.501	0.00500448
ENSMUSG00000001946	ESAM	-2.909	0.000664626
ENSMUSG00000001948	SPA17	-2.294	0.00608428
ENSMUSG00000001983	TACO1	1.067	5.60903e-13
ENSMUSG00000001999	BLVRA	1.829	1.55685e-35
ENSMUSG00000002007	SRPK3	-2.455	4.62805e-15
ENSMUSG00000002012	PNCK	-2.652	0.00285195
ENSMUSG00000002020	LTBP2	-4.136	2.3577e-05
ENSMUSG00000002033	CD3G	-1.306	2.5009e-06
ENSMUSG00000002055	SPAG5	1.427	0.0478704
ENSMUSG00000002076	HSF2BP	-3.507	0.000541425
ENSMUSG00000002083	BBC3	1.97	4.47688e-39
ENSMUSG00000002100	MYBPC3	-1.796	0.00228258
ENSMUSG00000002190	CLGN	5.285	1.40339e-11
ENSMUSG00000002204	NAPSA	-1.054	1.39808e-05
ENSMUSG00000002228	PPM1J	-1.099	2.20091e-06
ENSMUSG00000002249	TEAD3	-1.905	0.0172205
ENSMUSG00000002274	METRN	1.432	3.17134e-21
ENSMUSG00000002289	ANGPTL4	2.161	3.8777e-09
ENSMUSG00000002297	DBF4	1.515	8.58337e-29
ENSMUSG00000002319	IPO4	1.135	5.51381e-12
ENSMUSG00000002324	REC8	1.985	2.12775e-10
ENSMUSG00000002343	ARMC6	1.668	6.2491e-34
ENSMUSG00000002365	SNX9	-1.013	9.50146e-11
ENSMUSG00000002372	RANBP3	1.063	2.16264e-21
ENSMUSG00000002477	SNRPD1	1.761	4.44684e-29
ENSMUSG00000002500	RPL3L	-1.068	0.00497782
ENSMUSG00000002602	AXL	-1.143	0.00105569
ENSMUSG00000002658	GTF2F1	1.424	7.08581e-20
ENSMUSG00000002660	CLPP	1.201	2.07587e-14
ENSMUSG00000002668	DENND1C	-1.334	1.50113e-12
ENSMUSG00000002688	PRKD1	5.733	2.52408e-08
ENSMUSG00000002699	LCP2	1.201	3.313e-10
ENSMUSG00000002767	MRPL2	1.278	7.74491e-20
ENSMUSG00000002769	GNMT	-1.355	0.000372219
ENSMUSG00000002771	GRIN2D	3.694	1.63154e-29
ENSMUSG00000002797	GGCT	-1.226	8.85571e-10
ENSMUSG00000002799	JAG2	-2.018	4.55575e-09
ENSMUSG00000002808	EPDR1	4.745	1.76961e-11
ENSMUSG00000002831	PLIN4	-3.248	1.92708e-05
ENSMUSG00000002835	CHAF1A	3.369	5.8415e-48
ENSMUSG00000002870	MCM2	2.438	1.89053e-66
ENSMUSG00000002944	CD36	-2.66	0.00195085
ENSMUSG00000002984	TOMM40	1.104	3.55222e-14
ENSMUSG00000002997	PRKAR2B	-1.835	0.0187076
ENSMUSG00000003032	KLF4	-1.065	8.3349e-07
ENSMUSG00000003051	ELF3	-2.659	0.00177975
ENSMUSG00000003070	EFNA2	-1.821	0.00241577
ENSMUSG00000003072	ATP5D	1.017	5.33809e-18
ENSMUSG00000003134	TBC1D8	1.429	2.52057e-18
ENSMUSG00000003199	MPND	-1.089	3.20601e-12
ENSMUSG00000003206	EBI3	-1.002	0.00071156
ENSMUSG00000003271	SULT2B1	-1.378	0.0193128
ENSMUSG00000003283	HCK	-1.466	3.88129e-08
ENSMUSG00000003309	AP1M2	-1.182	0.000102828
ENSMUSG00000003355	FKBP11	-1.622	2.01536e-09
ENSMUSG00000003379	CD79A	-1.797	1.38321e-08
ENSMUSG00000003418	ST8SIA6	-1.546	4.54205e-08
ENSMUSG00000003423	PIH1D1	1.008	3.42408e-16
ENSMUSG00000003438	TIMM50	1.643	1.1875e-24
ENSMUSG00000003452	BICD1	-2.591	0.000414236
ENSMUSG00000003469	PHYHIP	-2.516	0.0105245
ENSMUSG00000003484	CYP4F18	-1.62	3.21788e-11
ENSMUSG00000003500	IMPDH1	1.739	1.10399e-25
ENSMUSG00000003528	SLC25A1	2.181	3.32597e-47
ENSMUSG00000003559	AS3MT	-1.118	0.00385913
ENSMUSG00000003585	SEC14L2	4.624	2.38889e-36
ENSMUSG00000003746	MAN1A	-1.768	1.50932e-16
ENSMUSG00000003779	KIF20A	3.352	1.40042e-63
ENSMUSG00000003808	FARSA	1.23	1.178e-34
ENSMUSG00000003809	GCDH	1.009	1.24709e-12
ENSMUSG00000003812	DNASE2A	1.744	7.50412e-33
ENSMUSG00000003813	RAD23A	-1.593	0.0348996
ENSMUSG00000003824	SYCE2	4.041	3.72014e-65
ENSMUSG00000003848	NOB1	1.676	1.48007e-19
ENSMUSG00000003849	NQO1	1.397	0.0486665
ENSMUSG00000003868	RUVBL2	1.347	1.54614e-11
ENSMUSG00000003873	BAX	1.076	1.07768e-17
ENSMUSG00000003882	IL7R	-1.378	7.56177e-06
ENSMUSG00000003948	MMD	-2.994	0.000726048
ENSMUSG00000003949	HLF	3.186	1.88895e-12
ENSMUSG00000003955	FAM162A	1.505	1.06109e-20
ENSMUSG00000004018	FANCL	1.288	4.40367e-05
ENSMUSG00000004043	STAT5A	1.396	2.10442e-29
ENSMUSG00000004044	CAVIN1	-2.077	0.0166964
ENSMUSG00000004071	CDIP1	-1.153	3.22911e-08
ENSMUSG00000004085	MAP3K20	1.532	4.96255e-11
ENSMUSG00000004099	DNMT1	1.315	5.16788e-11
ENSMUSG00000004100	PPAN	1.315	5.334e-14
ENSMUSG00000004105	ANGPTL2	1.156	2.2794e-06
ENSMUSG00000004110	CACNA1E	-1.939	6.55748e-13
ENSMUSG00000004264	PHB2	1.298	2.82895e-13
ENSMUSG00000004270	LPCAT3	2.554	4.54371e-42
ENSMUSG00000004383	LARGE1	-1.843	0.000154831
ENSMUSG00000004446	BID	-1.035	0.00248712
ENSMUSG00000004451	RALB	-1.151	3.77101e-05
ENSMUSG00000004462	TBCCD1	1.496	2.38339e-34
ENSMUSG00000004473	CLEC11A	2.515	2.62783e-19
ENSMUSG00000004500	ZFP324	1.275	5.76754e-12
ENSMUSG00000004508	GAB2	2.408	4.7421e-17
ENSMUSG00000004552	CTSE	-1.903	0.0191961
ENSMUSG00000004558	NDRG2	2.678	4.59799e-08
ENSMUSG00000004562	ARHGEF40	3.579	1.31394e-25
ENSMUSG00000004565	PNPLA6	1.338	8.23725e-20
ENSMUSG00000004568	ARHGEF18	-1.335	6.02528e-09
ENSMUSG00000004609	CD33	-2.157	0.000138507
ENSMUSG00000004610	ETFB	1.817	8.63134e-13
ENSMUSG00000004631	SGCE	-2.385	0.00582954
ENSMUSG00000004633	CHN2	1.989	2.60479e-13
ENSMUSG00000004642	SLBP	1.22	2.45296e-15
ENSMUSG00000004655	AQP1	-1.652	0.0448846
ENSMUSG00000004661	ARID3B	-1.213	4.88909e-14
ENSMUSG00000004665	CNN2	-1.741	0.00488266
ENSMUSG00000004668	ABCA13	-1.312	0.0249461
ENSMUSG00000004698	HDAC9	-2.061	3.98853e-19
ENSMUSG00000004707	LY9	-1.503	2.66535e-09
ENSMUSG00000004709	CD244A	-1.383	0.00017443
ENSMUSG00000004748	MTFP1	2.165	1.00085e-30
ENSMUSG00000004789	DLST	1.302	4.20101e-40
ENSMUSG00000004814	CCL24	2.545	0.00711031
ENSMUSG00000004837	GRAP	-1.611	4.28881e-13
ENSMUSG00000004849	AP1S1	1.113	0.00096569
ENSMUSG00000004864	MAPK13	-1.768	0.00249644
ENSMUSG00000004897	HDGF	2.4	1.32579e-34
ENSMUSG00000004929	THOP1	1.868	4.6965e-33
ENSMUSG00000004952	RASA4	-1.374	1.04387e-09
ENSMUSG00000005043	SGSH	-1.438	1.21521e-09
ENSMUSG00000005087	CD44	-1.152	0.0290509
ENSMUSG00000005125	NDRG1	-2.44	0.000443248
ENSMUSG00000005148	KLF5	3.13	4.89986e-07
ENSMUSG00000005225	PLEKHA8	-1.268	0.000434749
ENSMUSG00000005233	SPC25	1.956	2.28359e-05
ENSMUSG00000005251	RIPK4	-3.783	0.000108317
ENSMUSG00000005267	ZFP287	-1.897	7.49388e-18
ENSMUSG00000005268	PRLR	-3.047	0.00328063
ENSMUSG00000005338	CADM3	3.187	6.80631e-29
ENSMUSG00000005339	FCER1A	5.649	3.72623e-31
ENSMUSG00000005355	CASP14	-3.148	0.00224574
ENSMUSG00000005360	SLC1A3	4.716	8.27193e-08
ENSMUSG00000005364	IL5RA	-1.668	9.29939e-08
ENSMUSG00000005370	MSH6	1.254	1.90429e-21
ENSMUSG00000005410	MCM5	2.484	6.20827e-46
ENSMUSG00000005447	PAFAH1B3	1.207	7.3491e-09
ENSMUSG00000005470	ASF1B	3.001	1.38898e-40
ENSMUSG00000005481	DDX39	1.255	1.6522e-20
ENSMUSG00000005540	FCER2A	-2.003	6.17686e-10
ENSMUSG00000005547	CYP2A5	-3.374	0.0017248
ENSMUSG00000005566	TRIM28	1.144	2.45681e-13
ENSMUSG00000005583	MEF2C	-2.199	3.12661e-23
ENSMUSG00000005672	KIT	3.735	2.67103e-22
ENSMUSG00000005683	CS	1.385	3.08397e-19
ENSMUSG00000005686	AMPD3	1.04	2.92483e-05
ENSMUSG00000005696	SH2D1A	-1.256	7.49702e-06
ENSMUSG00000005718	TFAP4	1.049	8.82008e-09
ENSMUSG00000005732	RANBP1	1.754	2.07486e-30
ENSMUSG00000005763	CD247	-1.225	6.29433e-05
ENSMUSG00000005779	PSMB4	1.064	8.92739e-23
ENSMUSG00000005800	MMP8	-1.467	0.0317997
ENSMUSG00000005824	TNFSF14	-1.204	0.00524109
ENSMUSG00000005846	RSL1D1	1.218	3.33628e-14
ENSMUSG00000005873	REEP5	1.733	1.88144e-35
ENSMUSG00000005883	SPO11	-1.372	1.77065e-08
ENSMUSG00000005917	OTX1	-2.931	0.0235254
ENSMUSG00000005947	ITGAE	-1.6	2.14195e-07
ENSMUSG00000005958	EPHB3	-2.889	0.000570932
ENSMUSG00000005968	TUFT1	-1.926	0.000261086
ENSMUSG00000005973	RCN1	1.96	1.17887e-27
ENSMUSG00000005986	ANKRD13D	-1.667	4.2576e-11
ENSMUSG00000006014	PRG4	-1.269	0.000187268
ENSMUSG00000006095	TBCB	1.419	3.28677e-30
ENSMUSG00000006143	UPK3BL	-2.206	0.00932563
ENSMUSG00000006169	CLINT1	1.006	1.16622e-13
ENSMUSG00000006235	EPOR	2.69	2.25284e-05
ENSMUSG00000006315	TMEM147	1.655	1.15546e-25
ENSMUSG00000006342	SUSD2	2.359	1.0763e-10
ENSMUSG00000006344	GGT5	-1.814	1.72484e-05
ENSMUSG00000006345	GGT1	-1.583	3.89425e-07
ENSMUSG00000006356	CRIP2	2.245	7.81286e-14
ENSMUSG00000006360	CRIP1	2.147	2.80831e-32
ENSMUSG00000006362	CBFA2T3	1.329	2.89674e-22
ENSMUSG00000006369	FBLN1	-2.915	0.00157885
ENSMUSG00000006373	PGRMC1	1.949	1.87988e-15
ENSMUSG00000006386	TEK	4.3	1.33621e-08
ENSMUSG00000006389	MPL	-2.812	0.00134081
ENSMUSG00000006390	ELOVL1	1.975	3.24663e-33
ENSMUSG00000006398	CDC20	3.577	1.47486e-76
ENSMUSG00000006411	NECTIN4	-1.863	0.00171235
ENSMUSG00000006435	NEURL1A	-2.856	0.00118612
ENSMUSG00000006442	SRM	2.932	8.95831e-65
ENSMUSG00000006457	ACTN3	3.183	4.90482e-08
ENSMUSG00000006462	A530013C23RIK	-2.649	2.35733e-06
ENSMUSG00000006494	PDK1	-1.564	1.40592e-09
ENSMUSG00000006567	ATP7B	4.099	6.76321e-09
ENSMUSG00000006574	SLC4A1	-2.685	0.0147261
ENSMUSG00000006575	RUNDC3A	-1.424	0.014436
ENSMUSG00000006576	SLC4A3	-2.127	0.000151982
ENSMUSG00000006586	RUNX1T1	2.633	0.00214408
ENSMUSG00000006587	SNAI3	-1.587	1.57362e-09
ENSMUSG00000006589	APRT	1.241	3.56091e-11
ENSMUSG00000006641	SLC5A6	1.418	2.38585e-17
ENSMUSG00000006675	P4HTM	1.617	1.18864e-16
ENSMUSG00000006678	POLA1	2.005	1.25208e-09
ENSMUSG00000006715	GMNN	2.766	6.34019e-74
ENSMUSG00000006720	ZFP184	-1.434	6.77495e-05
ENSMUSG00000006728	CDK4	1.38	3.8649e-17
ENSMUSG00000006736	TSPAN31	1.289	2.16473e-16
ENSMUSG00000006763	SAAL1	1.697	6.49165e-24
ENSMUSG00000006777	KRT23	-2.536	0.00453157
ENSMUSG00000006782	CNP	-1.178	0.000198688
ENSMUSG00000006906	STAMBP	1.078	2.06295e-24
ENSMUSG00000006930	HAP1	-1.496	3.03335e-05
ENSMUSG00000006998	PSMD2	1.04	1.41736e-17
ENSMUSG00000007034	SLC44A4	-2.603	0.0028133
ENSMUSG00000007035	MSH5	1.767	8.38839e-23
ENSMUSG00000007036	ABHD16A	1.612	1.50814e-20
ENSMUSG00000007039	DDAH2	4.576	9.27438e-83
ENSMUSG00000007041	CLIC1	1.662	5.23488e-28
ENSMUSG00000007050	LSM2	1.474	9.30776e-23
ENSMUSG00000007080	POLE	2.799	4.30796e-78
ENSMUSG00000007216	ZFP775	-1.143	2.75134e-06
ENSMUSG00000007279	SCUBE2	6.653	4.8639e-15
ENSMUSG00000007415	GATAD1	-1.456	0.0378379
ENSMUSG00000007458	M6PR	1.089	3.74852e-08
ENSMUSG00000007570	FANCE	1.671	1.05457e-39
ENSMUSG00000007617	HOMER1	1.64	1.30354e-15
ENSMUSG00000007659	BCL2L1	-2.575	0.008093
ENSMUSG00000007739	CCT4	1.127	4.78016e-09
ENSMUSG00000007777	0610009B22RIK	1.141	7.08582e-09
ENSMUSG00000007783	CPT1C	2.213	8.21669e-08
ENSMUSG00000007872	ID3	-1.385	3.41639e-07
ENSMUSG00000007908	HMGCLL1	-1.678	0.000320454
ENSMUSG00000008129	4930432K21RIK	-1.012	0.000465291
ENSMUSG00000008136	FHL2	-1.306	0.00123515
ENSMUSG00000008193	SPIB	-1.682	8.41946e-09
ENSMUSG00000008373	PRPF31	1.036	1.71414e-13
ENSMUSG00000008398	ELK3	-1.661	1.30694e-12
ENSMUSG00000008496	POU2F2	-1.474	2.26284e-10
ENSMUSG00000008575	NFIB	-3.514	0.000711329
ENSMUSG00000008601	RAB25	-1.796	0.00532627
ENSMUSG00000008658	RBFOX1	4.833	1.36482e-09
ENSMUSG00000008730	HIPK1	-1.431	0.0147283
ENSMUSG00000008734	GPRC5B	-1.919	4.62517e-07
ENSMUSG00000008822	ACYP1	1.018	1.91995e-11
ENSMUSG00000008843	CLDN13	3.481	5.67758e-06
ENSMUSG00000008999	BMP7	4.16	1.92799e-37
ENSMUSG00000009092	DERL3	-1.36	0.00738812
ENSMUSG00000009112	BCL2L13	1.826	3.09263e-73
ENSMUSG00000009246	TRPM5	-1.255	0.00131736
ENSMUSG00000009291	PTTG1IP	-2.174	0.00737554
ENSMUSG00000009292	TRPM2	-2.903	1.14489e-10
ENSMUSG00000009350	MPO	1.786	0.00749737
ENSMUSG00000009376	MET	-1.344	0.00135481
ENSMUSG00000009378	SLC16A12	-3.278	0.000284739
ENSMUSG00000009551	6330409D20RIK	-3.762	2.94167e-06
ENSMUSG00000009575	CBX5	1.766	4.95939e-60
ENSMUSG00000009588	ST6GALNAC1	-2.471	0.00913758
ENSMUSG00000009614	SARDH	-2.275	0.00145101
ENSMUSG00000009621	VAV2	-1.475	1.35732e-14
ENSMUSG00000009628	TEX15	-2.033	4.17036e-05
ENSMUSG00000009647	MCU	1.056	0.0021758
ENSMUSG00000009681	BCR	-2.336	2.21208e-05
ENSMUSG00000009687	FXYD5	-1.413	1.20116e-06
ENSMUSG00000009731	KCND1	1.012	0.000161864
ENSMUSG00000009733	TFCP2	3.353	4.77158e-73
ENSMUSG00000009739	POU6F1	-1.903	2.8762e-18
ENSMUSG00000009772	NUAK2	-1.153	8.00603e-07
ENSMUSG00000009905	KDSR	1.125	2.79536e-16
ENSMUSG00000010021	KIF19A	-1.892	6.07537e-12
ENSMUSG00000010047	HYAL2	2.232	1.00542e-33
ENSMUSG00000010066	CACNA2D2	-1.263	4.27794e-06
ENSMUSG00000010080	EPN3	-2.752	0.000907573
ENSMUSG00000010095	SLC3A2	1.765	5.7848e-10
ENSMUSG00000010136	PIFO	-2.057	2.98943e-07
ENSMUSG00000010154	SPIRE2	2.831	8.04262e-06
ENSMUSG00000010307	TMEM86A	-1.092	0.00106019
ENSMUSG00000010406	MRPL52	1.662	2.45966e-29
ENSMUSG00000010461	EYA4	8.356	4.83297e-36
ENSMUSG00000010601	APOL7A	-2.574	0.00260603
ENSMUSG00000010607	PIGYL	1.688	8.90754e-21
ENSMUSG00000010609	PSEN2	1.9	6.75805e-56
ENSMUSG00000010660	PLCD1	-1.414	0.0167772
ENSMUSG00000010663	FADS1	2.998	2.61753e-53
ENSMUSG00000010721	LMBR1	-1.165	0.00155884
ENSMUSG00000010751	TNFRSF22	-1.591	2.64099e-09
ENSMUSG00000010797	WNT2	4.987	1.22249e-07
ENSMUSG00000010911	APIP	2.191	1.48372e-40
ENSMUSG00000010914	PDHX	1.28	2.93925e-30
ENSMUSG00000011008	MCOLN2	-1.879	3.63037e-13
ENSMUSG00000011034	SLC5A1	-2.588	0.00282827
ENSMUSG00000011114	TBRG1	1.349	1.64362e-22
ENSMUSG00000011254	THG1L	1.089	2.68256e-10
ENSMUSG00000011256	ADAM19	-1.911	5.2141e-12
ENSMUSG00000011263	EXOC3L2	-1.958	0.000381073
ENSMUSG00000011305	PLIN5	-3.796	1.86836e-06
ENSMUSG00000011752	PGAM1	1.115	3.94638e-07
ENSMUSG00000011837	SNAPC2	1.256	1.08712e-14
ENSMUSG00000012123	CRYBG2	-2.204	0.00231399
ENSMUSG00000012126	UBXN11	-1.716	1.0514e-24
ENSMUSG00000012187	MOGAT1	-3.423	0.0178181
ENSMUSG00000012211	TEX22	-1.113	0.00128782
ENSMUSG00000012428	STEAP4	-2.166	0.000696212
ENSMUSG00000012429	MPLKIP	1.222	2.07676e-16
ENSMUSG00000012443	KIF11	3.846	5.47398e-14
ENSMUSG00000012483	RPA3	1.747	3.83904e-23
ENSMUSG00000012519	MLKL	2.559	2.00997e-24
ENSMUSG00000012705	RETN	-2.793	8.29452e-06
ENSMUSG00000012819	CDH23	-3.492	6.96165e-05
ENSMUSG00000012889	PODNL1	-1.188	6.28609e-05
ENSMUSG00000013033	ADGRL1	2.229	2.88192e-34
ENSMUSG00000013076	AMOTL1	2.687	0.000456977
ENSMUSG00000013155	ENKD1	2.287	1.65212e-30
ENSMUSG00000013236	PTPRS	1.202	3.06327e-12
ENSMUSG00000013275	SLC41A1	-1.3	7.00251e-09
ENSMUSG00000013338	FER1L4	-2.539	0.008093
ENSMUSG00000013353	4931406B18RIK	-3.147	6.84226e-05
ENSMUSG00000013418	B4GALNT2	-2.404	3.91356e-11
ENSMUSG00000013419	ZFP651	-1.387	0.0367739
ENSMUSG00000013523	BCAS1	-1.781	0.0199891
ENSMUSG00000013539	TANGO2	1.602	1.71757e-12
ENSMUSG00000013593	NDUFS2	1.039	4.04651e-22
ENSMUSG00000013611	SNX31	-3.052	0.000405176
ENSMUSG00000013629	CAD	1.294	2.89471e-14
ENSMUSG00000013698	PEA15A	-1.005	0.0227578
ENSMUSG00000013766	LY6G6E	-2.242	0.0391973
ENSMUSG00000013936	MYL2	-2.331	0.000306226
ENSMUSG00000013974	MCEMP1	-1.963	0.000114553
ENSMUSG00000014030	PAX5	-2.08	2.55075e-11
ENSMUSG00000014074	RNF168	1.076	1.52787e-22
ENSMUSG00000014075	TCTEX1D2	-1.342	0.000120033
ENSMUSG00000014077	CHP1	-1.277	0.0387567
ENSMUSG00000014164	KLHL3	-1.875	8.30221e-11
ENSMUSG00000014177	TVP23B	1.316	7.37312e-31
ENSMUSG00000014444	PIEZO1	1.192	2.09745e-16
ENSMUSG00000014453	BLK	-1.873	1.34426e-12
ENSMUSG00000014543	KLRA17	-2.137	3.44148e-05
ENSMUSG00000014599	CSF1	-1.329	0.00514043
ENSMUSG00000014606	SLC25A11	1.512	7.80082e-28
ENSMUSG00000014633	CMC2	1.969	2.22186e-40
ENSMUSG00000014668	CHFR	1.407	7.46154e-54
ENSMUSG00000014686	CEACAM16	-2.024	2.00807e-09
ENSMUSG00000014725	ADAM28	-2.388	0.0127321
ENSMUSG00000014748	TEX261	1.056	7.18641e-16
ENSMUSG00000014773	DLL1	-2.313	1.70087e-13
ENSMUSG00000014786	SLC9A5	-1.227	0.0102984
ENSMUSG00000014846	TPPP3	1.434	6.35749e-06
ENSMUSG00000014856	TMEM208	1.106	4.4646e-21
ENSMUSG00000014859	E2F4	1.035	1.15634e-17
ENSMUSG00000014907	NAF1	1.648	9.15272e-26
ENSMUSG00000014932	YES1	-1.445	4.5684e-06
ENSMUSG00000014956	PPP1CB	-2.327	0.00990715
ENSMUSG00000014980	TSEN15	1.356	1.52697e-10
ENSMUSG00000015053	GATA2	3.332	9.7245e-12
ENSMUSG00000015093	CLIC3	-1.731	0.0189284
ENSMUSG00000015143	ACTN1	-2.035	0.000553134
ENSMUSG00000015176	NOLC1	1.105	2.58431e-10
ENSMUSG00000015202	CNKSR3	-1.816	2.50853e-37
ENSMUSG00000015217	HMGB3	4.108	5.4233e-73
ENSMUSG00000015222	MAP2	-1.192	0.0030241
ENSMUSG00000015243	ABCA1	-1.924	2.10486e-17
ENSMUSG00000015289	LAGE3	1.008	4.92024e-12
ENSMUSG00000015312	GADD45B	-1.558	0.0039162
ENSMUSG00000015314	SLAMF6	-1.937	6.04451e-16
ENSMUSG00000015316	SLAMF1	-3.011	0.000454366
ENSMUSG00000015340	CYBB	-1.205	0.000112221
ENSMUSG00000015377	DENND6B	-1.319	3.73404e-08
ENSMUSG00000015452	AGER	-1.019	2.51003e-05
ENSMUSG00000015476	PRRT1	-1.39	2.44431e-07
ENSMUSG00000015533	ITGA2	-3.171	0.000246335
ENSMUSG00000015542	NAT9	2.257	1.39672e-41
ENSMUSG00000015597	ZFP318	-2.301	4.55287e-19
ENSMUSG00000015599	TTBK1	-2.436	2.44734e-16
ENSMUSG00000015619	GATA3	1.405	6.5702e-13
ENSMUSG00000015709	ARNT2	-1.152	0.0322831
ENSMUSG00000015714	CERS2	1.28	6.13773e-24
ENSMUSG00000015745	PLEKHO1	-1.413	1.93321e-17
ENSMUSG00000015759	CNIH1	1.196	1.32081e-15
ENSMUSG00000015806	QDPR	1.348	5.83394e-28
ENSMUSG00000015879	FAM184B	4.432	1.09072e-12
ENSMUSG00000015880	NCAPG	3.857	4.64817e-14
ENSMUSG00000015889	LTA4H	1.049	1.86722e-10
ENSMUSG00000015950	NCF1	-1.402	2.06247e-09
ENSMUSG00000015966	IL17RB	-1.693	2.70858e-06
ENSMUSG00000015968	CACNA1D	-1.905	1.91954e-12
ENSMUSG00000015970	CHDH	-1.911	0.000259102
ENSMUSG00000015980	LRRC27	-2.146	1.52865e-06
ENSMUSG00000016018	MTREX	1.003	1.73543e-15
ENSMUSG00000016028	NA	-1.392	2.56641e-07
ENSMUSG00000016128	STARD13	6.736	2.32477e-15
ENSMUSG00000016194	HSD11B1	-1.298	2.21426e-10
ENSMUSG00000016200	SYT14	-2.452	0.0173922
ENSMUSG00000016206	H2-M3	-1.262	1.70142e-13
ENSMUSG00000016239	LONRF3	-1.194	0.0132728
ENSMUSG00000016255	TUBB1	-2.635	0.00265592
ENSMUSG00000016257	PRELID3B	1.506	2.15572e-43
ENSMUSG00000016308	UBE2A	1.022	5.57822e-16
ENSMUSG00000016319	SLC25A5	1.228	1.10875e-15
ENSMUSG00000016382	PLS3	-2.006	0.0116921
ENSMUSG00000016386	MPPED2	4.431	4.66993e-09
ENSMUSG00000016458	WT1	8.453	4.98775e-22
ENSMUSG00000016477	E2F3	1.084	9.78742e-06
ENSMUSG00000016487	PPFIBP1	-1.74	3.34897e-05
ENSMUSG00000016493	CD46	-1.291	1.25367e-07
ENSMUSG00000016495	PLGRKT	1.415	1.24418e-28
ENSMUSG00000016503	GTF3A	1.399	2.83836e-17
ENSMUSG00000016526	DYRK3	3.361	3.67127e-51
ENSMUSG00000016552	FOXRED2	-1.308	1.33676e-07
ENSMUSG00000016554	EIF3D	1.038	1.31694e-09
ENSMUSG00000016624	PHF21B	-1.174	2.71656e-06
ENSMUSG00000016756	CMAH	-2.148	2.0837e-20
ENSMUSG00000016757	TTLL12	2.128	4.3349e-59
ENSMUSG00000016833	MRPS18C	1.302	3.67716e-15
ENSMUSG00000016933	PLCG1	-1.25	9.55555e-10
ENSMUSG00000017002	SLPI	-1.318	0.00309204
ENSMUSG00000017009	SDC4	-1.819	1.65947e-12
ENSMUSG00000017057	IL13RA1	-1.314	0.00237398
ENSMUSG00000017132	CYTH1	-1.046	4.13003e-08
ENSMUSG00000017144	RND3	-1.508	8.18113e-05
ENSMUSG00000017146	BRCA1	2.331	3.7631e-56
ENSMUSG00000017167	CNTNAP1	-2.58	4.56892e-05
ENSMUSG00000017176	NT5C3B	1.128	1.15283e-09
ENSMUSG00000017221	PSMD3	1.223	4.96595e-19
ENSMUSG00000017286	GLOD4	1.174	1.42617e-18
ENSMUSG00000017314	MPP2	2.148	0.00633533
ENSMUSG00000017316	PPY	6.465	6.23437e-13
ENSMUSG00000017376	NLK	-1.587	0.00399337
ENSMUSG00000017400	STAC2	-1.946	8.70128e-13
ENSMUSG00000017417	PLXDC1	2.53	1.08994e-25
ENSMUSG00000017446	C1QTNF1	4.516	4.26329e-14
ENSMUSG00000017466	TIMP2	-1.411	0.000385746
ENSMUSG00000017499	CDC6	2.621	1.74797e-10
ENSMUSG00000017548	SUZ12	1.077	8.61825e-19
ENSMUSG00000017550	ATAD5	2.397	7.61947e-27
ENSMUSG00000017615	TNFAIP1	-1.103	1.92744e-13
ENSMUSG00000017639	RAB11FIP4	-1.721	1.51753e-08
ENSMUSG00000017652	CD40	-1.712	4.86017e-11
ENSMUSG00000017692	RHBDL3	-1.723	0.000234852
ENSMUSG00000017697	ADA	2.082	2.1695e-21
ENSMUSG00000017713	THA1	-1.532	3.22754e-12
ENSMUSG00000017716	BIRC5	2.712	1.94692e-07
ENSMUSG00000017737	MMP9	-2.145	0.000422985
ENSMUSG00000017740	SLC12A5	-1.244	0.00346598
ENSMUSG00000017756	SLC12A7	-1.588	2.31034e-08
ENSMUSG00000017765	SLC12A4	2.223	2.91252e-44
ENSMUSG00000017767	SPATA25	-2.853	2.00052e-08
ENSMUSG00000017861	MYBL2	3	2.39391e-24
ENSMUSG00000017897	EYA2	-2.065	8.25341e-11
ENSMUSG00000017978	CADPS2	-2.763	0.0248006
ENSMUSG00000018001	CYTH3	2.508	6.14624e-30
ENSMUSG00000018102	HIST1H2BC	-1.685	0.0428137
ENSMUSG00000018143	MAFK	1.057	5.17585e-14
ENSMUSG00000018166	ERBB3	2.41	4.25621e-15
ENSMUSG00000018168	IKZF3	-2.007	4.00139e-14
ENSMUSG00000018169	MFNG	-1.356	1.01638e-11
ENSMUSG00000018189	UCHL5	1.796	4.03461e-42
ENSMUSG00000018199	TROVE2	-1.956	0.0105773
ENSMUSG00000018239	ZCCHC10	1.895	9.08838e-40
ENSMUSG00000018286	PSMB6	1.158	1.21573e-18
ENSMUSG00000018287	SPAG7	1.053	2.63173e-14
ENSMUSG00000018340	ANXA6	-1.045	5.26534e-08
ENSMUSG00000018341	IL12RB2	2.283	1.85403e-13
ENSMUSG00000018362	KPNA2	1.695	9.67508e-23
ENSMUSG00000018379	SRSF1	1.181	2.74098e-22
ENSMUSG00000018395	KIF3A	2.379	4.23835e-33
ENSMUSG00000018398	2019-09-08	4.114	4.05449e-18
ENSMUSG00000018427	YPEL2	-1.079	0.0372583
ENSMUSG00000018428	AKAP1	3.172	2.96863e-56
ENSMUSG00000018446	C1QBP	1.677	4.87842e-22
ENSMUSG00000018449	RPAIN	1.264	2.54902e-16
ENSMUSG00000018509	CENPV	2.573	4.05967e-10
ENSMUSG00000018537	PCGF2	1.879	2.84577e-08
ENSMUSG00000018548	TRIM37	1.177	0.000289639
ENSMUSG00000018565	ELP5	1.644	4.07496e-46
ENSMUSG00000018566	SLC2A4	-3.61	0.00270647
ENSMUSG00000018569	CLDN7	-2.737	0.00520713
ENSMUSG00000018583	G3BP1	1.048	8.62686e-15
ENSMUSG00000018648	DUSP14	-2.261	0.00263971
ENSMUSG00000018659	PNPO	-2.026	0.0218584
ENSMUSG00000018666	CBX1	1.032	7.86655e-20
ENSMUSG00000018677	SLC25A39	-2.638	0.01214
ENSMUSG00000018698	LHX1	-3.88	1.52412e-06
ENSMUSG00000018750	ZBTB4	-1.505	1.81224e-11
ENSMUSG00000018770	ATP5G3	1.259	7.2535e-23
ENSMUSG00000018819	LSP1	-1.471	8.4184e-08
ENSMUSG00000018820	ZFYVE27	1.081	3.46064e-18
ENSMUSG00000018844	FNDC8	4.73	8.49739e-12
ENSMUSG00000018848	RARS	1.163	3.27375e-20
ENSMUSG00000018849	WWC1	-2.646	0.00182487
ENSMUSG00000018882	MRPL45	1.296	3.79533e-17
ENSMUSG00000018899	IRF1	-1.518	8.22838e-14
ENSMUSG00000018907	ALOX12E	-3.874	0.000134233
ENSMUSG00000018924	ALOX15	-3.691	2.50574e-08
ENSMUSG00000018927	CCL6	-1.257	0.00118514
ENSMUSG00000018965	YWHAH	-1.646	0.029677
ENSMUSG00000018983	E2F2	-2.248	0.00606486
ENSMUSG00000019102	ALDH3A1	-1.948	0.0238803
ENSMUSG00000019139	ISYNA1	2.089	1.03174e-35
ENSMUSG00000019158	TMEM160	1.373	3.61763e-17
ENSMUSG00000019194	SCN1B	1.499	0.000991202
ENSMUSG00000019214	CHTF18	1.88	5.29126e-28
ENSMUSG00000019301	HSD17B1	-1.033	0.000680091
ENSMUSG00000019312	GRB7	-2.266	2.03971e-05
ENSMUSG00000019320	NOXO1	-1.395	0.000488194
ENSMUSG00000019373	COPS3	1.06	1.22269e-24
ENSMUSG00000019429	FFAR3	-3.009	7.34071e-07
ENSMUSG00000019437	TLCD1	1.294	4.24059e-08
ENSMUSG00000019461	PLSCR3	1.237	3.80618e-18
ENSMUSG00000019467	ARHGEF25	5.671	1.29321e-28
ENSMUSG00000019478	RAB4A	4.283	2.24124e-50
ENSMUSG00000019494	COPS6	1.112	4.89335e-26
ENSMUSG00000019505	UBB	-1.585	0.0248095
ENSMUSG00000019528	GYG	1.078	6.34633e-07
ENSMUSG00000019579	MYDGF	1.038	1.06406e-13
ENSMUSG00000019590	CYB561	3.279	4.20771e-14
ENSMUSG00000019689	FMC1	1.798	6.33936e-26
ENSMUSG00000019737	SYNE4	-1.208	1.4901e-05
ENSMUSG00000019768	ESR1	-1.814	3.01958e-17
ENSMUSG00000019773	FBXO5	1.943	1.01428e-24
ENSMUSG00000019777	HDAC2	1.349	1.78334e-19
ENSMUSG00000019779	FRK	-2.403	0.00566463
ENSMUSG00000019822	SMPD2	-1.071	1.89747e-08
ENSMUSG00000019828	GRM1	-2.136	0.00131113
ENSMUSG00000019842	TRAF3IP2	-1.774	2.35377e-15
ENSMUSG00000019845	TUBE1	1.216	1.975e-10
ENSMUSG00000019846	LAMA4	2.359	0.0388415
ENSMUSG00000019849	PREP	2.065	2.46634e-14
ENSMUSG00000019850	TNFAIP3	1.136	0.00165006
ENSMUSG00000019851	PERP	2.402	0.00251133
ENSMUSG00000019853	HEBP2	-3.126	0.00427507
ENSMUSG00000019857	ASF1A	1.035	1.14928e-12
ENSMUSG00000019864	RTN4IP1	-2.292	0.00203849
ENSMUSG00000019866	CRYBG1	-1.061	2.66122e-09
ENSMUSG00000019876	PKIB	-1.372	5.28838e-08
ENSMUSG00000019877	SERINC1	-1.748	0.0171254
ENSMUSG00000019883	ECHDC1	1.553	1.30593e-19
ENSMUSG00000019889	PTPRK	-2.611	0.000881648
ENSMUSG00000019891	DCBLD1	-1.292	7.62588e-06
ENSMUSG00000019942	CDK1	4.563	4.11968e-39
ENSMUSG00000019944	RHOBTB1	3.834	1.79554e-53
ENSMUSG00000019947	ARID5B	-1.201	4.67207e-07
ENSMUSG00000019960	DUSP6	-1.732	2.26479e-09
ENSMUSG00000019961	TMPO	1.009	6.46834e-10
ENSMUSG00000019970	SGK1	-1.094	3.05312e-06
ENSMUSG00000019971	CEP290	2.306	9.35489e-24
ENSMUSG00000019975	IKBIP	1.191	1.05787e-08
ENSMUSG00000019977	HBS1L	1.264	3.65157e-41
ENSMUSG00000019978	EPB41L2	-1.318	1.50892e-26
ENSMUSG00000019979	APAF1	1.197	8.89069e-18
ENSMUSG00000019982	MYB	3.487	3.53026e-99
ENSMUSG00000019986	AHI1	1.233	1.7361e-15
ENSMUSG00000019988	NEDD1	1.294	3.72756e-17
ENSMUSG00000019989	ENPP3	-2.279	0.0111439
ENSMUSG00000019990	PDE7B	-3.196	0.000285624
ENSMUSG00000019992	MTFR2	2.35	2.76211e-10
ENSMUSG00000019996	MAP7	2.048	2.3187e-18
ENSMUSG00000020010	VNN3	-2.192	1.16749e-05
ENSMUSG00000020018	SNRPF	1.264	1.12635e-18
ENSMUSG00000020019	NTN4	3.903	8.08888e-11
ENSMUSG00000020021	FGD6	1.326	1.82571e-23
ENSMUSG00000020022	NDUFA12	1.553	3.04314e-32
ENSMUSG00000020023	TMCC3	1.992	4.46611e-22
ENSMUSG00000020027	SOCS2	3.745	5.09575e-27
ENSMUSG00000020032	NUAK1	4.486	6.04565e-46
ENSMUSG00000020038	CRY1	1.211	9.68424e-18
ENSMUSG00000020042	BTBD11	-1.537	2.4948e-10
ENSMUSG00000020044	TIMP3	-2.894	0.00182727
ENSMUSG00000020062	SLC5A8	-2.723	0.00209004
ENSMUSG00000020070	RUFY2	-1.202	1.79063e-11
ENSMUSG00000020072	PBLD2	-1.814	4.2132e-05
ENSMUSG00000020075	DDX21	1.106	3.4183e-11
ENSMUSG00000020078	VPS26A	1.141	3.59323e-16
ENSMUSG00000020089	PPA1	2.002	5.11116e-33
ENSMUSG00000020097	SGPL1	-1.229	1.89325e-07
ENSMUSG00000020099	UNC5B	-2.651	0.00518074
ENSMUSG00000020102	SLC16A7	-1.437	3.63451e-08
ENSMUSG00000020105	LRIG3	-1.774	3.39849e-07
ENSMUSG00000020108	DDIT4	1.799	2.13822e-13
ENSMUSG00000020114	CAND1	1.056	1.03875e-09
ENSMUSG00000020116	PNO1	1.333	1.57232e-18
ENSMUSG00000020121	SRGAP1	-1.985	0.00164187
ENSMUSG00000020122	EGFR	-2.087	0.00906991
ENSMUSG00000020124	USP15	-1.395	0.0453781
ENSMUSG00000020134	PELI1	-1.21	1.55817e-13
ENSMUSG00000020140	LGR5	-1.474	0.00161059
ENSMUSG00000020155	KCNMB1	-1.834	0.0473329
ENSMUSG00000020160	MEIS1	1.167	0.0178039
ENSMUSG00000020173	COBL	-2.118	0.0168638
ENSMUSG00000020175	RAB36	-2.168	0.000298045
ENSMUSG00000020176	GRB10	1.953	0.00653801
ENSMUSG00000020182	DDC	2.569	5.05178e-07
ENSMUSG00000020183	CPM	-2.057	1.58166e-20
ENSMUSG00000020185	E2F7	4.18	3.23269e-24
ENSMUSG00000020219	TIMM13	1.234	5.25547e-19
ENSMUSG00000020253	PPM1M	-1.091	1.44192e-10
ENSMUSG00000020262	ADARB1	-3.029	2.41323e-05
ENSMUSG00000020263	APPL2	-1.943	1.81943e-20
ENSMUSG00000020265	SUMO3	1.115	3.32681e-19
ENSMUSG00000020267	HINT1	1.339	8.87395e-15
ENSMUSG00000020275	REL	-1.52	1.35582e-12
ENSMUSG00000020279	IL9R	1.533	6.54528e-08
ENSMUSG00000020295	HBQ1A	-2.382	0.0229934
ENSMUSG00000020297	NSG2	-1.439	2.62319e-06
ENSMUSG00000020300	CPEB4	-1.732	0.007775
ENSMUSG00000020303	STC2	4.085	1.9681e-18
ENSMUSG00000020309	CHAC2	-1.807	0.0227578
ENSMUSG00000020325	FSTL3	1.082	1.26539e-05
ENSMUSG00000020328	NUDCD2	2.113	1.76288e-54
ENSMUSG00000020330	HMMR	3.702	3.86589e-09
ENSMUSG00000020333	ACSL6	-4.278	0.00361779
ENSMUSG00000020358	HNRNPAB	1.331	2.97087e-18
ENSMUSG00000020363	GFPT2	2.742	4.322e-07
ENSMUSG00000020376	RNF130	1.876	1.9103e-17
ENSMUSG00000020377	LTC4S	3.48	2.72728e-18
ENSMUSG00000020380	RAD50	1.317	2.05342e-29
ENSMUSG00000020383	IL13	4.369	5.58608e-12
ENSMUSG00000020389	CDKL3	-1.314	0.000423352
ENSMUSG00000020390	UBE2B	-2.027	0.00607501
ENSMUSG00000020393	KREMEN1	-1.527	3.09981e-15
ENSMUSG00000020395	ITK	-1.386	3.43073e-05
ENSMUSG00000020396	NEFH	3.824	4.55643e-35
ENSMUSG00000020397	MED7	1.393	1.98151e-21
ENSMUSG00000020399	HAVCR2	2.587	7.27805e-25
ENSMUSG00000020401	FAM71B	-1.934	6.29111e-09
ENSMUSG00000020407	UPP1	-1.401	0.0422437
ENSMUSG00000020415	PTTG1	-1.897	0.00400176
ENSMUSG00000020419	HORMAD2	-3.536	0.000358392
ENSMUSG00000020422	TNS3	-1.455	4.20582e-14
ENSMUSG00000020423	BTG2	-1.038	3.53353e-05
ENSMUSG00000020424	CASTOR1	1.602	2.2071e-17
ENSMUSG00000020427	IGFBP3	-3.979	0.00467277
ENSMUSG00000020430	PES1	1.103	4.23765e-12
ENSMUSG00000020439	SMTN	-2.487	0.000715481
ENSMUSG00000020453	PATZ1	1.065	8.96796e-17
ENSMUSG00000020457	DRG1	1.137	1.23744e-24
ENSMUSG00000020459	MTIF2	1.041	3.39365e-16
ENSMUSG00000020467	EFEMP1	-3.029	0.0165605
ENSMUSG00000020471	POLD2	1.333	3.14524e-11
ENSMUSG00000020490	BTNL10	-2.887	0.0068594
ENSMUSG00000020492	SKA2	1.475	7.32656e-22
ENSMUSG00000020493	PRR11	3.305	4.1425e-14
ENSMUSG00000020514	MRPL22	1.16	1.37266e-16
ENSMUSG00000020526	ZNHIT3	1.15	1.47851e-08
ENSMUSG00000020534	SHMT1	1.807	2.41966e-22
ENSMUSG00000020538	SREBF1	1.501	3.10769e-18
ENSMUSG00000020541	TOM1L1	2.822	1.86685e-05
ENSMUSG00000020547	BZW2	2.554	1.20182e-51
ENSMUSG00000020577	TSPAN13	1.478	2.98282e-24
ENSMUSG00000020592	SDC1	-1.61	0.000430234
ENSMUSG00000020593	LPIN1	2.436	3.61567e-60
ENSMUSG00000020599	RGS9	-2.858	0.000334359
ENSMUSG00000020607	FAM84A	-2.606	0.00243879
ENSMUSG00000020620	ABCA8B	-2.382	5.56593e-08
ENSMUSG00000020629	ADI1	1.015	7.00579e-09
ENSMUSG00000020635	FKBP1B	1.305	7.62607e-05
ENSMUSG00000020638	CMPK2	-1.147	2.53008e-07
ENSMUSG00000020641	RSAD2	-2.541	0.0177158
ENSMUSG00000020644	ID2	1.049	2.57741e-07
ENSMUSG00000020649	RRM2	2.683	1.03427e-07
ENSMUSG00000020650	BCAP29	1.495	1.4107e-18
ENSMUSG00000020653	KLF11	2.391	1.12146e-27
ENSMUSG00000020654	ADCY3	-1.606	5.99033e-15
ENSMUSG00000020664	DLD	1.093	1.61501e-15
ENSMUSG00000020668	KIF3C	-1.223	0.00128614
ENSMUSG00000020669	SH3YL1	-3.087	0.000170679
ENSMUSG00000020681	ACE	-1.238	0.000292984
ENSMUSG00000020682	MMP28	2.102	1.71172e-12
ENSMUSG00000020689	ITGB3	-2.225	0.00657134
ENSMUSG00000020697	LIG3	1.158	2.55583e-14
ENSMUSG00000020708	PSMC5	1.195	1.18374e-25
ENSMUSG00000020713	GH	-1.892	9.02612e-05
ENSMUSG00000020717	PECAM1	-2.278	6.07303e-06
ENSMUSG00000020718	POLG2	-1.229	8.03977e-07
ENSMUSG00000020720	PSMD12	1.085	5.5496e-17
ENSMUSG00000020728	CEP112	-2.766	0.00123161
ENSMUSG00000020733	SLC9A3R1	1.29	5.99033e-15
ENSMUSG00000020736	NT5C	1.045	6.3647e-13
ENSMUSG00000020739	NUP85	1.564	1.55637e-24
ENSMUSG00000020741	CLUH	1.046	1.5618e-12
ENSMUSG00000020758	ITGB4	-2.02	0.00972183
ENSMUSG00000020766	GALK1	1.807	7.7236e-37
ENSMUSG00000020773	TRIM47	4.879	2.81602e-40
ENSMUSG00000020787	P2RX1	-1.872	0.0236161
ENSMUSG00000020788	ATP2A3	-1.316	0.0217646
ENSMUSG00000020802	UBE2O	-2.95	0.00564612
ENSMUSG00000020806	RHBDF2	-1.441	5.35294e-15
ENSMUSG00000020808	PIMREG	3.962	1.63707e-13
ENSMUSG00000020829	SLC46A1	-1.32	0.008154
ENSMUSG00000020831	0610010K14RIK	-1.027	0.0154237
ENSMUSG00000020834	DHRS13	1.935	1.90302e-15
ENSMUSG00000020836	CORO6	-2.715	0.000253224
ENSMUSG00000020838	SLC6A4	-2.092	0.00982532
ENSMUSG00000020840	BLMH	1.77	1.20242e-56
ENSMUSG00000020841	CPD	3.065	2.58859e-19
ENSMUSG00000020846	RFLNB	-1.454	2.47921e-07
ENSMUSG00000020847	RPH3AL	-1.487	0.000514597
ENSMUSG00000020866	CACNA1G	-2.723	0.0140045
ENSMUSG00000020868	XYLT2	-1.173	1.68361e-12
ENSMUSG00000020869	LRRC59	1.328	4.93537e-24
ENSMUSG00000020882	CACNB1	-1.25	7.67704e-09
ENSMUSG00000020886	DLG4	-1.479	0.00964852
ENSMUSG00000020889	NR1D1	-1.154	0.0287037
ENSMUSG00000020891	ALOX8	-1.12	0.00125765
ENSMUSG00000020892	ALOXE3	-3.36	9.90898e-05
ENSMUSG00000020893	PER1	1.053	8.40627e-05
ENSMUSG00000020895	TMEM107	3.147	1.7162e-45
ENSMUSG00000020897	AURKB	2.99	1.04811e-66
ENSMUSG00000020900	MYH10	3.101	5.84489e-07
ENSMUSG00000020901	PIK3R5	-1.569	1.76121e-09
ENSMUSG00000020902	NTN1	-1.906	0.0190759
ENSMUSG00000020905	USP43	-3.381	0.0026386
ENSMUSG00000020911	KRT19	-2.592	0.00507487
ENSMUSG00000020914	TOP2A	3.005	4.44396e-09
ENSMUSG00000020921	TMEM101	1.546	3.07873e-32
ENSMUSG00000020922	LSM12	-2.548	0.00285365
ENSMUSG00000020925	CCDC43	1.518	2.49015e-23
ENSMUSG00000020929	EFTUD2	1.142	1.69738e-12
ENSMUSG00000020940	1700023F06RIK	-3.228	0.00112151
ENSMUSG00000020941	MAP3K14	-1.595	9.20157e-14
ENSMUSG00000020961	STON2	-2.474	0.000893355
ENSMUSG00000020974	POLE2	1.955	3.30448e-46
ENSMUSG00000020988	L2HGDH	1.391	8.66534e-18
ENSMUSG00000020990	CDKL1	-2.882	1.46923e-05
ENSMUSG00000021018	POLR2H	1.349	3.97229e-18
ENSMUSG00000021023	1110008L16RIK	1.184	8.18038e-15
ENSMUSG00000021024	PSMA6	1.024	1.01921e-17
ENSMUSG00000021048	MTHFD1	2.718	1.58792e-117
ENSMUSG00000021056	TEX21	5.217	9.83048e-12
ENSMUSG00000021062	RAB15	2.421	0.0460038
ENSMUSG00000021072	TMX1	1.067	0.000313618
ENSMUSG00000021079	TIMM9	1.096	2.03975e-10
ENSMUSG00000021087	RTN1	-1.573	1.0153e-07
ENSMUSG00000021108	PRKCH	-1.306	1.69925e-10
ENSMUSG00000021115	VRK1	1.395	1.23609e-28
ENSMUSG00000021116	EIF2S1	1.615	2.02961e-45
ENSMUSG00000021118	PLEK2	5.026	1.37754e-09
ENSMUSG00000021123	RDH12	-1.704	1.58595e-08
ENSMUSG00000021125	ARG2	-2.109	0.000973056
ENSMUSG00000021171	ESYT2	1.573	1.46559e-35
ENSMUSG00000021175	CDCA7L	1.679	1.39602e-23
ENSMUSG00000021176	EFCAB11	1.054	0.0230284
ENSMUSG00000021178	PSMC1	1.236	3.71496e-20
ENSMUSG00000021193	PITRM1	1.194	2.09436e-07
ENSMUSG00000021196	PFKP	1.861	2.28863e-39
ENSMUSG00000021203	OTUB2	3.515	1.94314e-55
ENSMUSG00000021208	IFI27L2B	3.57	0.0140843
ENSMUSG00000021215	NET1	1.717	1.97129e-17
ENSMUSG00000021217	TSHZ3	1.597	0.000114213
ENSMUSG00000021221	DPF3	2.994	3.16393e-06
ENSMUSG00000021243	FCF1	1.121	8.32507e-12
ENSMUSG00000021250	FOS	-1.391	0.00452052
ENSMUSG00000021252	ERG28	1.183	8.16707e-14
ENSMUSG00000021253	TGFB3	-1.571	1.01466e-07
ENSMUSG00000021257	ANGEL1	-1.523	4.0701e-16
ENSMUSG00000021262	EVL	-1.672	1.1093e-15
ENSMUSG00000021263	DEGS2	-1.992	7.62074e-11
ENSMUSG00000021265	SLC25A29	-1.505	2.60561e-09
ENSMUSG00000021273	FDFT1	1.827	4.82915e-24
ENSMUSG00000021278	AMN	-1.981	0.000439471
ENSMUSG00000021279	CDC42BPB	-1.403	0.00168819
ENSMUSG00000021282	EIF5	-1.612	0.0124828
ENSMUSG00000021287	XRCC3	1.177	9.02084e-07
ENSMUSG00000021298	GPR132	-1.618	1.85178e-11
ENSMUSG00000021313	RYR2	-2.054	1.94495e-11
ENSMUSG00000021319	SFRP4	6.197	5.94615e-11
ENSMUSG00000021322	AOAH	-1.339	0.000211529
ENSMUSG00000021336	SLC17A4	4.478	8.67627e-15
ENSMUSG00000021340	GPLD1	1.098	0.0310525
ENSMUSG00000021356	IRF4	-1.309	9.37611e-07
ENSMUSG00000021359	TFAP2A	-2.055	0.0151078
ENSMUSG00000021361	TMEM14C	2.039	2.73331e-25
ENSMUSG00000021362	GCM2	1.93	2.30529e-09
ENSMUSG00000021365	NEDD9	-1.141	7.31284e-07
ENSMUSG00000021375	KIF13A	1.107	0.000108201
ENSMUSG00000021377	DEK	1.088	1.88123e-17
ENSMUSG00000021384	SUSD3	-1.549	1.20335e-22
ENSMUSG00000021391	CENPP	2.792	1.7816e-18
ENSMUSG00000021400	WRNIP1	1.4	9.04621e-21
ENSMUSG00000021411	PXDC1	-2.095	2.14082e-21
ENSMUSG00000021423	LY86	-1.105	2.09098e-05
ENSMUSG00000021457	SYK	-1.625	4.36687e-14
ENSMUSG00000021476	HABP4	-1.231	1.92146e-14
ENSMUSG00000021485	MXD3	2.962	4.58506e-18
ENSMUSG00000021492	F12	-3.178	1.47379e-11
ENSMUSG00000021493	PDLIM7	-1.472	0.0169457
ENSMUSG00000021509	SLC25A48	-2.76	0.00136786
ENSMUSG00000021518	PTDSS1	1.137	9.81071e-12
ENSMUSG00000021520	UQCRB	1.156	1.31683e-13
ENSMUSG00000021537	CETN3	1.157	1.17876e-17
ENSMUSG00000021540	SMAD5	1.088	5.48598e-28
ENSMUSG00000021548	CCNH	1.083	4.90731e-16
ENSMUSG00000021550	2210016F16RIK	1.022	1.05801e-10
ENSMUSG00000021552	GKAP1	3.21	5.43626e-42
ENSMUSG00000021553	SLC28A3	-2.762	0.00173684
ENSMUSG00000021556	GOLM1	1.098	2.80792e-09
ENSMUSG00000021559	DAPK1	1.212	0.0228933
ENSMUSG00000021565	SLC6A19	-1.557	8.20743e-06
ENSMUSG00000021569	TRIP13	2.784	4.00774e-46
ENSMUSG00000021573	TPPP	1.872	1.56117e-10
ENSMUSG00000021587	PCSK1	-1.254	0.00163484
ENSMUSG00000021595	NSUN2	1.209	9.72229e-22
ENSMUSG00000021596	MCTP1	-3.151	0.000327588
ENSMUSG00000021607	MRPL36	1.206	3.39754e-16
ENSMUSG00000021611	TERT	-1.938	1.75624e-13
ENSMUSG00000021624	CD180	-1.463	9.13205e-12
ENSMUSG00000021636	MARVELD2	-1.431	2.33081e-08
ENSMUSG00000021638	OCLN	-2.801	0.000840841
ENSMUSG00000021640	NAIP1	-2.302	0.00408301
ENSMUSG00000021643	SERF1	2.583	1.90124e-22
ENSMUSG00000021661	ANKRA2	1.001	2.37304e-16
ENSMUSG00000021662	ARHGEF28	-1.963	0.0227052
ENSMUSG00000021670	HMGCR	1.397	1.46438e-41
ENSMUSG00000021675	F2RL2	-2.133	0.0119804
ENSMUSG00000021678	F2RL1	-1.328	5.70458e-06
ENSMUSG00000021693	KIF2A	-1.95	0.0101897
ENSMUSG00000021701	PLK2	-2.224	0.000145771
ENSMUSG00000021703	SERINC5	-1.17	2.92302e-08
ENSMUSG00000021704	MTX3	-1.181	7.12683e-10
ENSMUSG00000021707	DHFR	2.429	3.35694e-51
ENSMUSG00000021708	RASGRF2	-1.969	1.74676e-05
ENSMUSG00000021711	TRAPPC13	1.024	2.90604e-22
ENSMUSG00000021719	RGS7BP	4.796	2.89793e-17
ENSMUSG00000021725	PARP8	-1.74	1.26689e-13
ENSMUSG00000021728	EMB	-1.181	0.000824612
ENSMUSG00000021731	MRPS30	1.02	8.84679e-11
ENSMUSG00000021733	SLC4A7	-1.134	1.26739e-09
ENSMUSG00000021737	PSMD6	1.131	5.2551e-25
ENSMUSG00000021745	PTPRG	-2.364	0.0165174
ENSMUSG00000021749	OIT1	-2.644	0.0258243
ENSMUSG00000021756	IL6ST	-1.409	1.16595e-07
ENSMUSG00000021758	DDX4	1.854	1.06817e-06
ENSMUSG00000021759	PLPP1	2.389	0.000213931
ENSMUSG00000021771	VDAC2	1.47	1.97473e-48
ENSMUSG00000021773	COMTD1	1.092	5.72395e-08
ENSMUSG00000021775	NR1D2	-1.277	5.05762e-18
ENSMUSG00000021779	THRB	-1.941	0.000199002
ENSMUSG00000021782	DLG5	-1.904	0.000206844
ENSMUSG00000021785	NGLY1	1.273	4.83489e-16
ENSMUSG00000021796	BMPR1A	-1.221	0.00209004
ENSMUSG00000021830	TXNDC16	-1.93	6.03615e-15
ENSMUSG00000021831	ERO1L	2.753	1.97239e-39
ENSMUSG00000021832	PSMC6	1.239	2.09343e-30
ENSMUSG00000021835	BMP4	5.669	3.24586e-18
ENSMUSG00000021838	SAMD4	-2.882	0.00484209
ENSMUSG00000021846	PELI2	-1.348	0.000606732
ENSMUSG00000021884	HACL1	1.162	1.59378e-18
ENSMUSG00000021886	GPR65	-1.031	9.12465e-05
ENSMUSG00000021890	EAF1	1.28	1.60726e-16
ENSMUSG00000021892	SH3BP5	-1.694	1.48564e-17
ENSMUSG00000021895	ARHGEF3	-1.082	1.47259e-07
ENSMUSG00000021922	ITIH4	-2.024	0.0152439
ENSMUSG00000021929	KPNA3	1.22	6.90776e-16
ENSMUSG00000021932	RNASEH2B	1.764	2.98179e-45
ENSMUSG00000021939	CTSB	-1.281	0.0388133
ENSMUSG00000021947	CRYL1	1.141	1.78842e-12
ENSMUSG00000021950	ANXA8	-2.922	0.0071073
ENSMUSG00000021957	TKT	1.778	1.44925e-28
ENSMUSG00000021965	SKA3	3.25	9.52419e-23
ENSMUSG00000021967	MRPL57	1.432	2.65479e-24
ENSMUSG00000021978	EXTL3	1.039	6.55317e-16
ENSMUSG00000021986	AMER2	-2.728	7.20985e-06
ENSMUSG00000022010	TSC22D1	-3.052	0.00145692
ENSMUSG00000022012	ENOX1	-2.934	0.00398647
ENSMUSG00000022013	DNAJC15	-1.056	8.68211e-08
ENSMUSG00000022014	EPSTI1	-1.335	2.20016e-11
ENSMUSG00000022016	AKAP11	-1.499	2.24491e-15
ENSMUSG00000022018	RGCC	-1.137	0.0017943
ENSMUSG00000022019	TDRD3	1.249	4.20072e-07
ENSMUSG00000022026	OLFM4	-2.014	0.0142544
ENSMUSG00000022033	PBK	4.784	1.38935e-16
ENSMUSG00000022035	CCDC25	1.069	4.59192e-26
ENSMUSG00000022037	CLU	-2.613	0.00352706
ENSMUSG00000022048	DPYSL2	1.25	1.36378e-21
ENSMUSG00000022051	BNIP3L	-2.497	0.0104511
ENSMUSG00000022057	ADAMDEC1	1.542	0.00139722
ENSMUSG00000022070	BORA	2.339	1.61504e-64
ENSMUSG00000022085	PEBP4	-2.868	0.0195994
ENSMUSG00000022090	PDLIM2	-1.562	9.0937e-13
ENSMUSG00000022091	SORBS3	-2.1	8.34569e-11
ENSMUSG00000022092	PPP3CC	-1.371	2.18077e-12
ENSMUSG00000022094	SLC39A14	-1.003	0.000267915
ENSMUSG00000022098	BMP1	4.129	2.15313e-09
ENSMUSG00000022100	XPO7	-1.402	0.0168785
ENSMUSG00000022103	GFRA2	2.809	1.27644e-06
ENSMUSG00000022114	SPRY2	1.714	4.11204e-12
ENSMUSG00000022120	RNF219	1.007	2.09436e-07
ENSMUSG00000022122	EDNRB	2.106	0.0216221
ENSMUSG00000022123	SCEL	-2.238	0.00448896
ENSMUSG00000022132	CLDN10	-1.5	1.61216e-06
ENSMUSG00000022139	MBNL2	-1.229	0.0199183
ENSMUSG00000022142	NUP155	1.174	1.77884e-20
ENSMUSG00000022146	OSMR	-2.215	0.0135746
ENSMUSG00000022176	REM2	2.452	9.81853e-05
ENSMUSG00000022177	HAUS4	1.658	3.85481e-41
ENSMUSG00000022180	SLC7A8	5.221	6.90836e-64
ENSMUSG00000022191	DROSHA	1.347	5.75168e-47
ENSMUSG00000022195	6030458C11RIK	1.06	2.95495e-16
ENSMUSG00000022197	PDZD2	2.721	1.14191e-22
ENSMUSG00000022199	SLC22A17	-1.711	5.75227e-07
ENSMUSG00000022203	EFS	-3.987	0.006164
ENSMUSG00000022217	EMC9	1.146	3.13303e-11
ENSMUSG00000022221	RIPK3	1.04	1.98363e-08
ENSMUSG00000022225	CMA1	6.267	7.87589e-47
ENSMUSG00000022226	MCPT2	4.179	2.60295e-06
ENSMUSG00000022227	MCPT1	3.298	0.00790018
ENSMUSG00000022228	ZSCAN26	-1.006	3.00507e-07
ENSMUSG00000022231	SEMA5A	1.084	0.00153479
ENSMUSG00000022234	CCT5	1.36	1.78022e-15
ENSMUSG00000022237	ANKRD33B	2.18	4.60247e-08
ENSMUSG00000022241	TARS	1.439	1.77891e-20
ENSMUSG00000022244	AMACR	-1.164	2.01471e-07
ENSMUSG00000022257	LAPTM4B	-1.117	0.00339772
ENSMUSG00000022270	RETREG1	-1.641	5.67291e-20
ENSMUSG00000022272	MYO10	-1.802	6.06346e-05
ENSMUSG00000022283	PABPC1	-2.23	0.0153663
ENSMUSG00000022286	GRHL2	3.453	0.000606237
ENSMUSG00000022299	SLC25A32	1.169	5.61494e-12
ENSMUSG00000022300	DCAF13	1.089	9.72675e-16
ENSMUSG00000022304	DPYS	-3.321	0.00126057
ENSMUSG00000022305	LRP12	2.804	5.40921e-28
ENSMUSG00000022309	ANGPT1	-2.667	0.0033131
ENSMUSG00000022314	RAD21	1.469	3.3521e-38
ENSMUSG00000022322	SHCBP1	3.971	1.21308e-12
ENSMUSG00000022323	RIDA	-2.22	0.00772524
ENSMUSG00000022324	MATN2	-1.147	0.00625465
ENSMUSG00000022325	POP1	1.605	8.94804e-18
ENSMUSG00000022332	KHDRBS3	-2.922	0.000729524
ENSMUSG00000022337	EMC2	1.726	1.0066e-20
ENSMUSG00000022338	ENY2	1.257	5.53192e-17
ENSMUSG00000022346	MYC	2.07	1.24061e-36
ENSMUSG00000022351	SQLE	2.024	9.10902e-14
ENSMUSG00000022358	FBXO32	-1.804	2.46342e-25
ENSMUSG00000022359	WDYHV1	1.142	2.22027e-12
ENSMUSG00000022360	ATAD2	1.655	2.02392e-38
ENSMUSG00000022364	TBC1D31	1.465	5.37012e-09
ENSMUSG00000022382	WNT7B	-2.592	0.0186741
ENSMUSG00000022383	PPARA	-3.019	0.0143331
ENSMUSG00000022385	GTSE1	2.835	2.44187e-39
ENSMUSG00000022403	ST13	1.195	4.57516e-17
ENSMUSG00000022414	TAB1	1.196	1.45754e-11
ENSMUSG00000022415	SYNGR1	2.369	0.00328615
ENSMUSG00000022416	CACNA1I	-2.325	1.50368e-15
ENSMUSG00000022422	DSCC1	2.501	5.64129e-34
ENSMUSG00000022434	FAM118A	-1.383	1.85184e-09
ENSMUSG00000022437	SAMM50	1.014	6.41617e-06
ENSMUSG00000022438	PARVB	-2.133	0.0104961
ENSMUSG00000022439	PARVG	1.274	9.35275e-12
ENSMUSG00000022441	EFCAB6	-2.004	0.0261432
ENSMUSG00000022442	TTLL1	-1.684	0.00526417
ENSMUSG00000022443	MYH9	-1.545	0.00183238
ENSMUSG00000022445	CYP2D26	-1.821	0.0102383
ENSMUSG00000022450	NDUFA6	1.085	5.08767e-20
ENSMUSG00000022451	TWF1	-1.427	0.0245416
ENSMUSG00000022453	NAGA	1.259	4.04131e-13
ENSMUSG00000022471	XRCC6	1.269	4.77933e-35
ENSMUSG00000022474	PMM1	2.383	9.17816e-23
ENSMUSG00000022476	POLR3H	1.389	2.16373e-15
ENSMUSG00000022477	ACO2	1.334	6.36672e-31
ENSMUSG00000022485	HOXC5	7.073	9.29113e-08
ENSMUSG00000022500	LITAF	-2.613	0.00125963
ENSMUSG00000022504	CIITA	-1.615	1.75106e-09
ENSMUSG00000022505	EMP2	-3.236	0.000527574
ENSMUSG00000022508	BCL6	-1.439	5.70285e-08
ENSMUSG00000022510	TRP63	-3.849	0.036064
ENSMUSG00000022512	CLDN1	-1.546	0.0279594
ENSMUSG00000022517	MGRN1	-1.28	6.55968e-17
ENSMUSG00000022528	HES1	-1.023	1.14512e-06
ENSMUSG00000022533	ATP13A3	2.106	2.29957e-66
ENSMUSG00000022534	MEFV	-1.144	0.0167966
ENSMUSG00000022537	TMEM44	3.329	2.39865e-10
ENSMUSG00000022540	ROGDI	-1.514	8.54578e-16
ENSMUSG00000022543	4930451G09RIK	-1.469	3.60684e-06
ENSMUSG00000022550	ADCK5	1.856	1.73697e-29
ENSMUSG00000022551	CYC1	1.108	1.2064e-15
ENSMUSG00000022555	DGAT1	-1.059	0.0026107
ENSMUSG00000022558	MROH1	1.34	1.43592e-16
ENSMUSG00000022561	GPAA1	1.212	1.81825e-21
ENSMUSG00000022562	OPLAH	1.193	3.7382e-05
ENSMUSG00000022564	GRINA	-1.774	0.0083269
ENSMUSG00000022565	PLEC	1.208	4.60563e-10
ENSMUSG00000022570	TSTA3	1.192	1.6271e-18
ENSMUSG00000022571	PYCRL	1.102	2.87277e-10
ENSMUSG00000022574	NAPRT	2.366	1.7323e-39
ENSMUSG00000022582	LY6G	-1.545	0.0393706
ENSMUSG00000022586	LY6I	-1.9	4.03336e-06
ENSMUSG00000022594	LYNX1	-1.956	2.79638e-10
ENSMUSG00000022602	ARC	-1.735	6.299e-05
ENSMUSG00000022610	MAPK12	-2.293	1.59243e-14
ENSMUSG00000022621	RABL2	1.123	9.21755e-05
ENSMUSG00000022623	SHANK3	3.971	1.19064e-10
ENSMUSG00000022629	KIF21A	-3.446	0.00533781
ENSMUSG00000022636	ALCAM	-1.722	1.58722e-11
ENSMUSG00000022651	RETNLG	-1.781	0.00697238
ENSMUSG00000022657	CD96	-1.259	3.25911e-06
ENSMUSG00000022661	CD200	-2.064	4.70373e-17
ENSMUSG00000022667	CD200R1	1.112	0.000291841
ENSMUSG00000022671	MZT2	1.444	3.34963e-15
ENSMUSG00000022673	MCM4	1.713	3.62455e-39
ENSMUSG00000022683	PLA2G10	-2.202	0.0152687
ENSMUSG00000022686	B3GNT5	-2.152	2.10894e-15
ENSMUSG00000022687	BOC	-2.205	0.0216107
ENSMUSG00000022696	SIDT1	-1.654	1.31833e-12
ENSMUSG00000022698	NAA50	1.451	1.54658e-26
ENSMUSG00000022706	MRPL40	1.226	2.81229e-19
ENSMUSG00000022707	GBE1	-1.201	0.00107885
ENSMUSG00000022708	ZBTB20	-1.353	3.03519e-12
ENSMUSG00000022722	ARL6	1.97	4.82738e-12
ENSMUSG00000022723	CRYBG3	-1.64	2.43846e-18
ENSMUSG00000022742	CPOX	2.239	3.32549e-10
ENSMUSG00000022747	ST3GAL6	-1.069	3.5488e-08
ENSMUSG00000022748	CMSS1	1.48	1.30283e-12
ENSMUSG00000022750	KLHL22	3.227	1.09509e-89
ENSMUSG00000022751	NIT2	1.066	2.40544e-07
ENSMUSG00000022752	TOMM70A	1.462	6.19256e-28
ENSMUSG00000022755	ADGRG7	1.215	0.00824293
ENSMUSG00000022756	SLC7A4	4.152	6.13531e-17
ENSMUSG00000022757	TFG	1.108	4.22235e-18
ENSMUSG00000022762	NCAM2	-2.093	0.0165191
ENSMUSG00000022763	AIFM3	-1.602	0.0184118
ENSMUSG00000022774	NCBP2	1.016	2.323e-13
ENSMUSG00000022788	FGD4	-1.419	4.0545e-05
ENSMUSG00000022790	IGSF11	7.774	4.38861e-12
ENSMUSG00000022814	UMPS	1.272	1.77784e-10
ENSMUSG00000022817	ITGB5	-3.043	0.00020506
ENSMUSG00000022818	CYP2AB1	-1.054	0.00118227
ENSMUSG00000022820	NDUFB4	1.567	1.52392e-16
ENSMUSG00000022824	MUC13	1.517	0.0252958
ENSMUSG00000022833	CCDC14	2.123	4.91008e-37
ENSMUSG00000022836	MYLK	-2.463	0.00304357
ENSMUSG00000022840	ADCY5	-2.268	0.00716499
ENSMUSG00000022842	ECE2	1.249	2.6099e-13
ENSMUSG00000022843	CLCN2	1.393	1.22069e-14
ENSMUSG00000022844	PDIA5	-1.171	0.0216491
ENSMUSG00000022861	DGKG	-2.113	1.96694e-07
ENSMUSG00000022864	D16ERTD472E	1.15	1.5649e-16
ENSMUSG00000022865	CXADR	-2.071	0.00143417
ENSMUSG00000022876	SAMSN1	2.215	1.56013e-19
ENSMUSG00000022881	RFC4	2.453	2.97548e-49
ENSMUSG00000022883	ROBO1	-1.858	0.0116343
ENSMUSG00000022885	ST6GAL1	-1.301	1.83567e-06
ENSMUSG00000022900	ILDR1	-1.627	0.00053456
ENSMUSG00000022901	CD86	-1.519	4.03914e-09
ENSMUSG00000022913	PSMG1	1.432	5.82921e-16
ENSMUSG00000022915	NA	-1.385	0.00175036
ENSMUSG00000022938	FAM3B	2.012	0.000606543
ENSMUSG00000022941	RIPPLY3	1.57	0.0335786
ENSMUSG00000022945	CHAF1B	3.544	1.13214e-88
ENSMUSG00000022948	SETD4	-1.118	8.57786e-08
ENSMUSG00000022952	RUNX1	1.57	2.50853e-37
ENSMUSG00000022956	ATP5O	1.223	1.71056e-26
ENSMUSG00000022957	ITSN1	-2.151	0.00218588
ENSMUSG00000022962	GART	1.113	3.99465e-11
ENSMUSG00000022964	TMEM50B	-1.143	1.2029e-05
ENSMUSG00000022972	CFAP298	1.324	1.63759e-14
ENSMUSG00000022978	MIS18A	1.137	6.16813e-20
ENSMUSG00000022986	KRT75	-2.016	0.0437158
ENSMUSG00000022994	ADCY6	2.371	2.62602e-05
ENSMUSG00000022995	ENAH	2.283	0.00282963
ENSMUSG00000022999	LMBR1L	-1.29	7.47006e-18
ENSMUSG00000023004	TUBA1B	2.598	2.55879e-77
ENSMUSG00000023007	PRPF40B	-1.383	6.8846e-10
ENSMUSG00000023008	FMNL3	-1.391	2.9337e-19
ENSMUSG00000023009	NCKAP5L	-1.777	2.85331e-13
ENSMUSG00000023015	RACGAP1	1.936	2.39461e-50
ENSMUSG00000023019	GPD1	-1.36	0.000976384
ENSMUSG00000023030	SLC11A2	1.494	2.48597e-14
ENSMUSG00000023031	CELA1	-2.694	0.00374968
ENSMUSG00000023032	SLC4A8	-1.615	1.11114e-14
ENSMUSG00000023033	SCN8A	-2.979	3.79025e-08
ENSMUSG00000023039	KRT7	-2.274	0.00663782
ENSMUSG00000023041	KRT6B	-2.214	0.0138961
ENSMUSG00000023044	CSAD	-1.135	9.32567e-12
ENSMUSG00000023045	SOAT2	1.401	0.000592136
ENSMUSG00000023047	AMHR2	-1.188	0.00352706
ENSMUSG00000023052	NPFF	-1.277	4.68039e-07
ENSMUSG00000023067	CDKN1A	2.865	7.17888e-11
ENSMUSG00000023079	GTF2IRD1	-1.596	2.72347e-06
ENSMUSG00000023084	LRRC71	-2.555	1.35706e-09
ENSMUSG00000023089	NDUFA5	1.049	1.08294e-09
ENSMUSG00000023092	FHL1	-3.289	0.000307088
ENSMUSG00000023094	MSRB2	-1.629	3.3665e-09
ENSMUSG00000023104	RFC2	2.114	1.79174e-51
ENSMUSG00000023110	PRMT5	1.118	5.32295e-11
ENSMUSG00000023150	IVNS1ABP	1.59	5.24871e-22
ENSMUSG00000023169	SLC38A1	-1.185	2.54484e-07
ENSMUSG00000023186	VWA5A	1.158	1.21161e-07
ENSMUSG00000023206	IL15RA	-1.477	1.19968e-14
ENSMUSG00000023216	EPB42	-2.496	0.0167007
ENSMUSG00000023232	SERINC2	-2.181	0.0179181
ENSMUSG00000023236	SCG5	-1.162	0.000101156
ENSMUSG00000023243	KCNK5	1.648	1.22464e-13
ENSMUSG00000023249	PARP3	-1.165	5.11665e-07
ENSMUSG00000023267	GABRR2	-2.234	4.06683e-10
ENSMUSG00000023274	CD4	-1.556	1.52017e-05
ENSMUSG00000023328	ACHE	1.359	0.0376628
ENSMUSG00000023330	DTWD1	1.579	7.18075e-18
ENSMUSG00000023341	MX2	-2.016	1.1799e-10
ENSMUSG00000023345	POC1A	1.886	1.81145e-36
ENSMUSG00000023393	SLC17A9	1.051	1.65794e-10
ENSMUSG00000023467	TULP2	3.151	8.98292e-13
ENSMUSG00000023473	CELSR3	-1.872	4.14735e-05
ENSMUSG00000023505	CDCA3	2.302	3.23993e-07
ENSMUSG00000023571	C1QTNF12	3.955	1.27277e-54
ENSMUSG00000023572	CCNDBP1	-2.639	0.00523565
ENSMUSG00000023800	TIAM2	-1.115	5.64013e-06
ENSMUSG00000023805	SYNJ2	-1.239	2.21806e-17
ENSMUSG00000023806	RSPH3B	1.245	2.94433e-07
ENSMUSG00000023809	RPS6KA2	3.702	8.95892e-40
ENSMUSG00000023828	SLC22A3	4.254	1.94798e-11
ENSMUSG00000023830	IGF2R	-1.479	2.63911e-11
ENSMUSG00000023832	ACAT2	1.12	3.03393e-12
ENSMUSG00000023868	PDE10A	-2.115	0.0126512
ENSMUSG00000023873	1700010I14RIK	-1.679	5.92739e-14
ENSMUSG00000023883	PHF10	1.788	7.51447e-44
ENSMUSG00000023903	MMP25	-1.68	0.00151063
ENSMUSG00000023909	PAQR4	4.394	1.14365e-55
ENSMUSG00000023912	SLC25A27	-2.24	5.52156e-18
ENSMUSG00000023913	PLA2G7	-1.185	0.00915473
ENSMUSG00000023921	MUT	1.293	4.41669e-28
ENSMUSG00000023927	SATB1	-1.936	5.53958e-14
ENSMUSG00000023940	SGO1	3.575	1.93007e-19
ENSMUSG00000023942	SLC29A1	2.893	2.83519e-53
ENSMUSG00000023944	HSP90AB1	1.151	5.63316e-08
ENSMUSG00000023951	VEGFA	2.027	0.000225893
ENSMUSG00000023953	POLH	1.376	7.10435e-28
ENSMUSG00000023959	CLIC5	-2.522	0.00259306
ENSMUSG00000023960	ENPP5	3.404	9.1437e-11
ENSMUSG00000023961	ENPP4	3.445	2.22632e-68
ENSMUSG00000023963	CYP39A1	-1.328	9.73024e-08
ENSMUSG00000023966	RSPH9	1.908	0.000123343
ENSMUSG00000023968	CRIP3	-2.897	5.81728e-13
ENSMUSG00000023979	GUCA1B	-1.471	5.5369e-07
ENSMUSG00000023988	BYSL	1.095	6.99741e-21
ENSMUSG00000023990	TFEB	-1.074	6.32983e-08
ENSMUSG00000023993	TREML1	-2.298	0.00718099
ENSMUSG00000024008	CPNE5	-2.312	8.69249e-14
ENSMUSG00000024011	PI16	-1.311	0.00167
ENSMUSG00000024013	FGD2	-1.686	1.54827e-13
ENSMUSG00000024026	GLO1	1.572	1.35419e-05
ENSMUSG00000024042	SIK1	-1.756	1.68932e-08
ENSMUSG00000024043	ARHGAP28	-2.427	0.00196219
ENSMUSG00000024049	MYOM1	-2.523	0.00324629
ENSMUSG00000024056	NDC80	1.741	1.29549e-31
ENSMUSG00000024059	CLIP4	-3.44	0.00192391
ENSMUSG00000024063	LBH	-1.788	2.58186e-14
ENSMUSG00000024064	GALNT14	-1.899	0.00125278
ENSMUSG00000024065	EHD3	-1.516	1.47304e-11
ENSMUSG00000024066	XDH	-1.271	0.00033224
ENSMUSG00000024067	DPY30	1.273	8.96504e-16
ENSMUSG00000024072	YIPF4	-2.242	0.00994499
ENSMUSG00000024074	CRIM1	-1.238	1.83933e-08
ENSMUSG00000024078	TTC27	1.085	5.94572e-21
ENSMUSG00000024095	HNRNPLL	1.035	4.27352e-05
ENSMUSG00000024098	TWSG1	1.942	3.75771e-27
ENSMUSG00000024099	NDUFV2	1.199	2.69186e-26
ENSMUSG00000024112	CACNA1H	-1.91	1.61646e-09
ENSMUSG00000024120	LRPPRC	1.036	4.71585e-28
ENSMUSG00000024131	SLC3A1	-1.333	2.97859e-07
ENSMUSG00000024136	DNASE1L2	-1.006	0.000135515
ENSMUSG00000024143	RHOQ	-1.198	9.18588e-09
ENSMUSG00000024158	HAGH	-2.41	0.0117133
ENSMUSG00000024165	JPT2	1.797	4.30863e-39
ENSMUSG00000024186	RGS11	-1.648	4.10269e-06
ENSMUSG00000024190	DUSP1	-2.357	4.24875e-09
ENSMUSG00000024193	PHF1	-1.023	5.2813e-15
ENSMUSG00000024194	CUTA	1.532	3.61102e-40
ENSMUSG00000024213	NUDT3	-1.777	0.017842
ENSMUSG00000024215	SPDEF	-2.788	0.0118093
ENSMUSG00000024228	NUDT12	1.786	0.00192354
ENSMUSG00000024231	CUL2	1.142	2.00602e-12
ENSMUSG00000024232	BAMBI	1.234	3.11641e-06
ENSMUSG00000024235	MAP3K8	-1.374	1.92469e-10
ENSMUSG00000024247	PKDCC	-1.003	0.0030772
ENSMUSG00000024253	DYNC2LI1	-1.038	0.0139092
ENSMUSG00000024258	POLR2D	1.157	6.44358e-16
ENSMUSG00000024299	ADAMTS10	-1.453	7.80966e-19
ENSMUSG00000024300	MYO1F	-1.104	0.000352592
ENSMUSG00000024301	KIFC5B	1.389	2.45396e-13
ENSMUSG00000024302	DTNA	-3.638	0.00118209
ENSMUSG00000024309	PFDN6	1.019	6.56266e-19
ENSMUSG00000024330	COL11A2	-1.626	3.66195e-11
ENSMUSG00000024331	DSC2	-3.929	0.00156872
ENSMUSG00000024340	BTNL2	-2.611	4.4247e-21
ENSMUSG00000024347	PSD2	-3.099	6.69553e-06
ENSMUSG00000024349	TMEM173	-1.274	1.15677e-08
ENSMUSG00000024352	SPATA24	1.326	2.93816e-08
ENSMUSG00000024353	MZB1	-1.52	2.49119e-08
ENSMUSG00000024354	SLC23A1	-2.064	6.97524e-05
ENSMUSG00000024359	HSPA9	1.225	7.49388e-18
ENSMUSG00000024360	ETF1	1.064	2.01508e-13
ENSMUSG00000024369	NELFE	1.006	2.409e-16
ENSMUSG00000024378	STARD4	1.289	4.0734e-11
ENSMUSG00000024381	BIN1	-1.842	0.000288178
ENSMUSG00000024399	LTB	-1.644	8.66466e-12
ENSMUSG00000024402	LTA	-1.919	2.55782e-14
ENSMUSG00000024404	RIOK3	-2.183	0.00918949
ENSMUSG00000024414	MRPL27	1.229	3.24796e-18
ENSMUSG00000024420	ZFP521	3.948	2.63763e-13
ENSMUSG00000024421	LAMA3	-2.351	0.00988733
ENSMUSG00000024430	CABYR	1.616	8.37418e-07
ENSMUSG00000024442	DELE1	1.628	1.405e-25
ENSMUSG00000024451	ARAP3	1.64	2.08118e-08
ENSMUSG00000024462	GABBR1	-1.075	1.79102e-11
ENSMUSG00000024472	DCP2	1.012	4.15847e-15
ENSMUSG00000024479	MAL2	-2.083	0.0204816
ENSMUSG00000024486	HBEGF	-2.159	0.00818271
ENSMUSG00000024493	LARS	1.337	2.20105e-30
ENSMUSG00000024501	DPYSL3	-2.105	0.0234775
ENSMUSG00000024526	CIDEA	-3.047	0.000887552
ENSMUSG00000024537	PSMG2	1.686	3.85796e-30
ENSMUSG00000024538	PPIC	-1.108	0.000190374
ENSMUSG00000024539	PTPN2	1.035	3.27034e-17
ENSMUSG00000024544	LDLRAD4	-1.154	2.45682e-12
ENSMUSG00000024548	SETBP1	-2.026	3.19496e-17
ENSMUSG00000024552	SLC14A2	-2.905	0.00142573
ENSMUSG00000024556	ME2	1.55	3.54237e-23
ENSMUSG00000024561	MBD1	1.126	1.07198e-27
ENSMUSG00000024570	RBFA	1.843	8.11301e-55
ENSMUSG00000024571	GM16286	1.135	1.41708e-32
ENSMUSG00000024579	PCYOX1L	1.484	2.10642e-13
ENSMUSG00000024583	TXNL1	1.52	1.07389e-15
ENSMUSG00000024588	FECH	-2.693	0.0125955
ENSMUSG00000024590	LMNB1	1.464	1.79015e-06
ENSMUSG00000024610	CD74	-1.422	3.1323e-05
ENSMUSG00000024617	CAMK2A	-1.109	0.000454076
ENSMUSG00000024620	PDGFRB	-1.976	1.77049e-05
ENSMUSG00000024640	PSAT1	3.015	1.32321e-70
ENSMUSG00000024659	ANXA1	-1.183	0.00500137
ENSMUSG00000024660	INCENP	1.263	3.28863e-05
ENSMUSG00000024663	RAB3IL1	-1.77	0.0474817
ENSMUSG00000024665	FADS2	1.616	0.0154021
ENSMUSG00000024666	TMEM138	1.023	9.17602e-13
ENSMUSG00000024669	CD5	-1.556	4.82811e-07
ENSMUSG00000024670	CD6	-1.511	4.35719e-08
ENSMUSG00000024673	MS4A1	-1.582	1.74311e-07
ENSMUSG00000024675	MS4A4C	-1.548	1.47923e-09
ENSMUSG00000024677	MS4A6B	-1.392	5.27477e-08
ENSMUSG00000024678	MS4A4D	-2.025	9.50496e-08
ENSMUSG00000024680	MS4A2	4.95	1.00992e-29
ENSMUSG00000024683	MRPL16	1.405	1.53454e-14
ENSMUSG00000024697	GNA14	4.864	2.86649e-16
ENSMUSG00000024726	CARNMT1	2.018	5.65821e-35
ENSMUSG00000024735	PRPF19	1.071	4.55736e-09
ENSMUSG00000024736	TMEM132A	-1.208	0.00154564
ENSMUSG00000024737	SLC15A3	-1.132	0.0247878
ENSMUSG00000024738	PGA5	3.345	0.000937708
ENSMUSG00000024740	DDB1	1.452	6.41459e-29
ENSMUSG00000024742	FEN1	2.251	3.14072e-49
ENSMUSG00000024747	ALDH1A7	-2.665	0.00586236
ENSMUSG00000024749	TMC1	-2.945	0.00109748
ENSMUSG00000024759	ATL3	1.333	9.38197e-33
ENSMUSG00000024761	GM16437	-1.889	0.0206144
ENSMUSG00000024774	ANKRD22	-2.098	0.000433918
ENSMUSG00000024776	STAMBPL1	-1.769	1.40988e-14
ENSMUSG00000024778	FAS	-1.506	2.35644e-06
ENSMUSG00000024782	AK3	1.657	6.46751e-23
ENSMUSG00000024785	RCL1	1.337	1.79831e-22
ENSMUSG00000024790	SAC3D1	1.795	5.18418e-26
ENSMUSG00000024791	CDCA5	3.638	2.43342e-39
ENSMUSG00000024793	TNFRSF25	-1.353	4.03312e-07
ENSMUSG00000024795	KIF20B	1.771	7.52037e-30
ENSMUSG00000024800	RPP30	1.161	3.812e-13
ENSMUSG00000024810	IL33	-3.08	0.0419199
ENSMUSG00000024812	TJP2	-2.183	0.00151453
ENSMUSG00000024826	DPF2	1.054	6.57522e-31
ENSMUSG00000024833	POLA2	1.208	8.92833e-21
ENSMUSG00000024844	BANF1	1.575	1.88144e-35
ENSMUSG00000024873	CNIH2	-1.118	0.0114783
ENSMUSG00000024875	YIF1A	1.092	1.13985e-10
ENSMUSG00000024892	PCX	-1.665	0.0218988
ENSMUSG00000024896	MINPP1	2.73	2.60214e-82
ENSMUSG00000024899	PAPSS2	3.795	1.16578e-20
ENSMUSG00000024901	PELI3	-1.784	2.53615e-07
ENSMUSG00000024910	CTSW	-1.032	3.23098e-05
ENSMUSG00000024922	OVOL1	-2.59	0.000646317
ENSMUSG00000024925	RNASEH2C	1.17	3.95734e-19
ENSMUSG00000024935	SLC1A1	-2.289	0.0057243
ENSMUSG00000024948	MAP4K2	-1.545	4.05054e-13
ENSMUSG00000024959	BAD	1.225	9.94449e-18
ENSMUSG00000024960	PLCB3	1.121	1.65857e-15
ENSMUSG00000024962	VEGFB	1.735	6.46751e-23
ENSMUSG00000024966	STIP1	1.197	1.26104e-06
ENSMUSG00000024968	RCOR2	-1.619	2.87446e-10
ENSMUSG00000024974	SMC3	1.133	2.10289e-27
ENSMUSG00000024978	GPAM	1.295	1.09819e-12
ENSMUSG00000024981	ACSL5	1.688	9.02218e-50
ENSMUSG00000024982	ZDHHC6	1.08	5.80525e-15
ENSMUSG00000024987	CYP26A1	2.276	7.14664e-08
ENSMUSG00000024989	CEP55	2.855	1.84465e-31
ENSMUSG00000024997	PRDX3	2.138	3.10186e-09
ENSMUSG00000024998	PLCE1	-1.874	0.00148152
ENSMUSG00000025001	HELLS	2.111	2.54528e-33
ENSMUSG00000025007	ALDH18A1	1.692	1.02293e-45
ENSMUSG00000025017	PIK3AP1	-1.429	8.99524e-10
ENSMUSG00000025025	MXI1	-1.546	0.036127
ENSMUSG00000025027	XPNPEP1	1.658	2.20667e-06
ENSMUSG00000025044	MSR1	-1.16	0.0213779
ENSMUSG00000025064	COL17A1	-2.238	0.0416023
ENSMUSG00000025068	GSTO1	-2.333	0.00862345
ENSMUSG00000025076	CASP7	1.897	8.38867e-14
ENSMUSG00000025077	DCLRE1A	1.967	3.4183e-28
ENSMUSG00000025085	ABLIM1	-1.686	3.25293e-11
ENSMUSG00000025089	GFRA1	1.305	0.00131378
ENSMUSG00000025092	HSPA12A	-1.551	1.53389e-07
ENSMUSG00000025094	SLC18A2	3.288	1.47939e-07
ENSMUSG00000025104	HDGFL3	-1.198	2.20667e-06
ENSMUSG00000025134	ALYREF	1.731	6.73171e-38
ENSMUSG00000025140	PYCR1	1.114	0.0423056
ENSMUSG00000025141	MYADML2	-2.987	7.71541e-05
ENSMUSG00000025150	CBR2	-2.379	0.0160919
ENSMUSG00000025154	ARHGAP19	2.36	3.71892e-34
ENSMUSG00000025157	ZDHHC16	1.071	1.43821e-28
ENSMUSG00000025163	CD7	-1.612	0.000965356
ENSMUSG00000025189	CNNM1	4.902	2.3193e-14
ENSMUSG00000025193	CUTC	1.041	1.06525e-11
ENSMUSG00000025194	ABCC2	-1.85	2.35404e-05
ENSMUSG00000025202	SCD3	-4.51	0.0130434
ENSMUSG00000025203	SCD2	2.297	3.72047e-38
ENSMUSG00000025204	NDUFB8	1.093	3.42068e-09
ENSMUSG00000025207	SEMA4G	-1.139	0.00360502
ENSMUSG00000025212	SFXN3	1.094	7.87871e-16
ENSMUSG00000025213	KAZALD1	4.837	6.02493e-40
ENSMUSG00000025217	BTRC	1.499	1.02947e-26
ENSMUSG00000025221	KCNIP2	-1.38	1.43455e-07
ENSMUSG00000025227	MFSD13A	1.806	1.1176e-13
ENSMUSG00000025241	FYCO1	-1.604	0.000169593
ENSMUSG00000025268	MAGED2	-2.823	0.00159551
ENSMUSG00000025270	ALAS2	-3.086	0.00761225
ENSMUSG00000025277	ABHD6	-1.59	6.5041e-11
ENSMUSG00000025278	FLNB	2.141	1.01017e-29
ENSMUSG00000025314	PTPRJ	-1.735	0.00385745
ENSMUSG00000025321	ITGB8	-1.292	0.0419816
ENSMUSG00000025328	PADI3	3.674	1.28424e-19
ENSMUSG00000025330	PADI4	-2.242	3.31361e-06
ENSMUSG00000025350	RDH5	-1.208	1.69569e-06
ENSMUSG00000025352	GDF11	-2.116	7.87147e-14
ENSMUSG00000025353	ORMDL2	1.46	3.27134e-29
ENSMUSG00000025355	MMP19	-3.002	0.000470477
ENSMUSG00000025357	DGKA	-1.363	1.71757e-12
ENSMUSG00000025358	CDK2	1.349	3.66803e-18
ENSMUSG00000025364	PA2G4	1.787	1.18105e-39
ENSMUSG00000025366	ESYT1	1.202	2.22218e-12
ENSMUSG00000025372	BAIAP2	-1.813	3.57768e-13
ENSMUSG00000025375	AATK	-2.19	2.59749e-06
ENSMUSG00000025380	FSCN2	-1.843	0.00591906
ENSMUSG00000025381	CNPY2	1.854	8.18831e-38
ENSMUSG00000025395	PRIM1	2.013	1.05738e-29
ENSMUSG00000025401	MYO1A	-1.317	0.000188193
ENSMUSG00000025403	SHMT2	1.876	3.17457e-32
ENSMUSG00000025417	PIP4K2C	1.822	3.00164e-70
ENSMUSG00000025427	RNF165	-3.55	1.17884e-05
ENSMUSG00000025428	ATP5A1	1.154	1.12772e-16
ENSMUSG00000025429	PSTPIP2	2.184	2.29495e-19
ENSMUSG00000025433	CRISP3	-1.98	3.03452e-06
ENSMUSG00000025461	CD163L1	-1.883	1.2212e-06
ENSMUSG00000025473	ADAM8	-1.768	0.000589703
ENSMUSG00000025477	INPP5A	-1.598	0.0028867
ENSMUSG00000025489	IFITM5	-1.667	0.00665504
ENSMUSG00000025491	IFITM1	-2.012	0.000669636
ENSMUSG00000025492	IFITM3	-1.262	0.000476992
ENSMUSG00000025498	IRF7	-1.58	9.21755e-05
ENSMUSG00000025500	LMNTD2	-2.059	9.17964e-15
ENSMUSG00000025503	TALDO1	-1.284	0.043904
ENSMUSG00000025504	EPS8L2	-2.496	0.00251344
ENSMUSG00000025507	PIDD1	1.284	4.0507e-14
ENSMUSG00000025510	CD151	-1.792	0.0228685
ENSMUSG00000025511	TSPAN4	3.226	2.12925e-44
ENSMUSG00000025533	ASL	1.119	2.46867e-22
ENSMUSG00000025555	FARP1	-1.274	0.00130253
ENSMUSG00000025557	SLC15A1	-2.578	0.00101664
ENSMUSG00000025558	DOCK9	1.521	4.84372e-28
ENSMUSG00000025573	6030468B19RIK	1.67	1.05738e-08
ENSMUSG00000025574	TK1	1.88	3.77666e-25
ENSMUSG00000025591	TMA16	1.063	1.18449e-08
ENSMUSG00000025608	PODXL	5.506	6.58099e-19
ENSMUSG00000025613	CCT8	1.306	9.90221e-25
ENSMUSG00000025630	HPRT	1.907	4.35836e-41
ENSMUSG00000025647	SHISA5	-1.37	5.45659e-08
ENSMUSG00000025648	PFKFB4	-1.895	8.77003e-08
ENSMUSG00000025650	COL7A1	-1.264	0.00178209
ENSMUSG00000025651	UQCRC1	1.096	2.737e-21
ENSMUSG00000025701	ALOX5	3.731	6.87283e-25
ENSMUSG00000025732	MCRIP2	2.054	8.59625e-21
ENSMUSG00000025746	IL6	3.975	4.09447e-19
ENSMUSG00000025747	TYMS	2.425	6.01001e-16
ENSMUSG00000025754	AGBL1	-1.335	0.001855
ENSMUSG00000025758	PLK4	1.863	2.24472e-08
ENSMUSG00000025780	ITIH5	1.14	3.0283e-05
ENSMUSG00000025784	CLEC3B	-2.813	0.000577074
ENSMUSG00000025785	EXOSC7	1.213	1.16578e-20
ENSMUSG00000025794	RPL14	1.33	6.00592e-14
ENSMUSG00000025804	CCR1	-1.467	0.00954696
ENSMUSG00000025812	PARD3	-2.383	0.0028213
ENSMUSG00000025813	HOMER2	3.028	7.05909e-07
ENSMUSG00000025817	NUDT5	1.403	2.86318e-24
ENSMUSG00000025825	ISCU	-2.266	0.00297629
ENSMUSG00000025856	PDGFA	-3.317	0.000136323
ENSMUSG00000025858	GET4	1.117	9.13188e-16
ENSMUSG00000025867	CPLX2	2.567	7.95209e-17
ENSMUSG00000025869	NOP16	1.456	8.67312e-19
ENSMUSG00000025871	4833439L19RIK	-1.292	0.0296193
ENSMUSG00000025875	TSPAN17	-2.422	0.00363613
ENSMUSG00000025876	UNC5A	-1.065	0.0004808
ENSMUSG00000025877	HK3	-1.691	2.68141e-05
ENSMUSG00000025880	SMAD7	-1.442	5.3664e-13
ENSMUSG00000025885	MYO5B	-2.561	0.00982734
ENSMUSG00000025888	CASP1	-1.221	3.93626e-08
ENSMUSG00000025889	SNCA	-3.161	0.00507032
ENSMUSG00000025899	ALKBH8	1.653	3.51917e-51
ENSMUSG00000025912	MYBL1	1.331	6.37194e-10
ENSMUSG00000025917	COPS5	1.216	1.70569e-24
ENSMUSG00000025920	STAU2	-2.633	0.000495505
ENSMUSG00000025927	TFAP2B	-4.044	0.00652014
ENSMUSG00000025932	EYA1	-2.458	6.51666e-19
ENSMUSG00000025936	GM4956	1.027	0.000516302
ENSMUSG00000025938	SLCO5A1	-1.813	3.4906e-08
ENSMUSG00000025962	FASTKD2	1.044	7.03438e-09
ENSMUSG00000025978	RFTN2	-1.843	1.03875e-09
ENSMUSG00000025980	HSPD1	1.453	3.04802e-12
ENSMUSG00000025983	CCDC150	-3.024	0.00039511
ENSMUSG00000025997	IKZF2	3.395	8.25918e-43
ENSMUSG00000026003	ACADL	1.751	3.83887e-41
ENSMUSG00000026009	ICOS	-1.341	6.49417e-06
ENSMUSG00000026011	CTLA4	-1.107	0.000431422
ENSMUSG00000026012	CD28	-1.697	1.11227e-08
ENSMUSG00000026014	RAPH1	-1.183	0.000128778
ENSMUSG00000026020	NOP58	1.549	1.07615e-27
ENSMUSG00000026024	ALS2	2.359	2.64636e-81
ENSMUSG00000026027	STRADB	-2.032	0.00755388
ENSMUSG00000026037	ORC2	1.332	2.85163e-23
ENSMUSG00000026039	SGO2A	3.048	6.28767e-27
ENSMUSG00000026043	COL3A1	-3.454	0.00589289
ENSMUSG00000026047	KDELC1	1.925	2.67062e-42
ENSMUSG00000026049	TEX30	1.57	3.23197e-21
ENSMUSG00000026068	IL18RAP	-1.418	1.72028e-05
ENSMUSG00000026069	IL1RL1	5.078	1.32925e-44
ENSMUSG00000026072	IL1R1	3.079	4.3774e-10
ENSMUSG00000026073	IL1R2	-1.99	0.00114315
ENSMUSG00000026077	NPAS2	-2.257	0.00311873
ENSMUSG00000026080	CHST10	-1.404	1.65395e-09
ENSMUSG00000026083	EIF5B	1.317	3.9835e-31
ENSMUSG00000026090	2010300C02RIK	-1.77	0.0156593
ENSMUSG00000026094	STK17B	-1.195	1.79622e-09
ENSMUSG00000026102	INPP1	-1.404	2.59345e-18
ENSMUSG00000026107	NABP1	-1.111	5.16817e-09
ENSMUSG00000026113	INPP4A	-1.865	6.22063e-07
ENSMUSG00000026116	TMEM131	1.006	5.16819e-10
ENSMUSG00000026117	ZAP70	-1.313	5.36951e-07
ENSMUSG00000026121	SEMA4C	1.991	7.38947e-12
ENSMUSG00000026134	PRIM2	1.446	3.37307e-11
ENSMUSG00000026153	FAM135A	-1.185	0.0247878
ENSMUSG00000026155	SMAP1	-1.58	0.0333434
ENSMUSG00000026158	OGFRL1	-1.513	6.84945e-05
ENSMUSG00000026167	WNT10A	-1.221	0.0143603
ENSMUSG00000026170	CYP27A1	-1.97	1.21167e-17
ENSMUSG00000026172	BCS1L	1.015	2.35695e-08
ENSMUSG00000026174	CNOT9	1.343	1.09413e-19
ENSMUSG00000026177	SLC11A1	-1.14	0.00257844
ENSMUSG00000026180	CXCR2	-2.065	0.000656138
ENSMUSG00000026185	IGFBP5	-3.057	0.00833171
ENSMUSG00000026192	ATIC	1.342	5.08988e-28
ENSMUSG00000026196	BARD1	2.038	9.83432e-05
ENSMUSG00000026201	STK16	1.002	4.69546e-15
ENSMUSG00000026203	DNAJB2	-2.158	0.00219973
ENSMUSG00000026204	PTPRN	-1.962	0.0168263
ENSMUSG00000026209	DNPEP	1.428	2.84502e-35
ENSMUSG00000026220	SLC16A14	-2.475	3.68765e-06
ENSMUSG00000026222	SP100	-1.201	2.81054e-13
ENSMUSG00000026229	PSMD1	1.372	2.59701e-46
ENSMUSG00000026235	EPHA4	-1.989	0.00187451
ENSMUSG00000026239	PDE6D	1.328	5.44295e-23
ENSMUSG00000026249	SERPINE2	-2.693	0.00216539
ENSMUSG00000026270	CAPN10	1.034	4.96158e-13
ENSMUSG00000026274	PASK	2.851	2.42865e-45
ENSMUSG00000026281	DTYMK	1.477	2.91169e-23
ENSMUSG00000026315	SERPINB8	-1.476	0.0128221
ENSMUSG00000026327	SERPINB11	-2.251	0.0139382
ENSMUSG00000026342	SLC35F5	-1.302	0.00107481
ENSMUSG00000026347	TMEM163	-1.846	4.49193e-16
ENSMUSG00000026348	ACMSD	-2.123	0.0463398
ENSMUSG00000026355	MCM6	2.563	1.56771e-72
ENSMUSG00000026356	DARS	1.258	1.24014e-29
ENSMUSG00000026357	RGS18	-1.766	0.0377771
ENSMUSG00000026358	RGS1	2.321	2.40825e-11
ENSMUSG00000026360	RGS2	-1.036	0.00170319
ENSMUSG00000026377	NIFK	1.359	8.93012e-19
ENSMUSG00000026383	EPB41L5	-1.368	6.19814e-07
ENSMUSG00000026385	DBI	1.446	4.12258e-12
ENSMUSG00000026389	STEAP3	3.699	1.81868e-48
ENSMUSG00000026395	PTPRC	-1.565	6.34628e-08
ENSMUSG00000026401	CD55B	-1.127	0.00131411
ENSMUSG00000026407	CACNA1S	-1.072	0.000351395
ENSMUSG00000026411	TMEM9	3.523	1.5871e-72
ENSMUSG00000026417	PIGR	-2.845	0.00114368
ENSMUSG00000026427	EIF2D	2.314	3.29936e-82
ENSMUSG00000026429	UBE2T	1.64	1.38655e-19
ENSMUSG00000026435	SLC45A3	4.291	2.33335e-08
ENSMUSG00000026437	CDK18	-2.653	0.00438379
ENSMUSG00000026447	PIK3C2B	-1.259	2.47374e-13
ENSMUSG00000026450	CHIT1	-2.251	0.0145605
ENSMUSG00000026457	ADIPOR1	-2.308	0.00830285
ENSMUSG00000026458	PPFIA4	-1.19	0.000162384
ENSMUSG00000026478	LAMC1	1.496	3.71577e-06
ENSMUSG00000026482	RGL1	2.099	1.45357e-36
ENSMUSG00000026489	COQ8A	-1.31	2.3673e-10
ENSMUSG00000026490	CDC42BPA	-2.669	0.00121484
ENSMUSG00000026491	AHCTF1	1.021	5.36068e-13
ENSMUSG00000026494	KIF26B	5.331	2.72811e-16
ENSMUSG00000026514	CNIH3	-3.298	0.00173495
ENSMUSG00000026520	PYCR2	1.609	2.04004e-28
ENSMUSG00000026526	FH1	1.082	2.82005e-08
ENSMUSG00000026532	SPTA1	-2.917	0.00788264
ENSMUSG00000026535	IFI202B	-2.247	0.0278799
ENSMUSG00000026536	IFI211	-1.485	0.000795537
ENSMUSG00000026544	DUSP23	-2.541	0.00199681
ENSMUSG00000026556	VANGL2	-1.457	5.88595e-08
ENSMUSG00000026558	UCK2	2.332	3.52505e-49
ENSMUSG00000026563	TADA1	1.178	6.63115e-13
ENSMUSG00000026576	ATP1B1	-1.442	8.49934e-10
ENSMUSG00000026579	F5	-2.815	0.00146621
ENSMUSG00000026580	SELP	-1.825	0.0200057
ENSMUSG00000026581	SELL	-1.626	9.73024e-08
ENSMUSG00000026589	SEC16B	-1.634	2.75899e-08
ENSMUSG00000026594	RALGPS2	-1.545	1.12153e-15
ENSMUSG00000026603	SMYD2	1.766	2.97476e-12
ENSMUSG00000026604	PTPN14	-1.459	2.15383e-05
ENSMUSG00000026605	CENPF	2.797	1.87075e-06
ENSMUSG00000026614	SLC30A10	6.007	3.59965e-15
ENSMUSG00000026615	EPRS	1.142	6.61535e-28
ENSMUSG00000026616	CR2	-2.004	6.93902e-11
ENSMUSG00000026618	IARS2	1.215	2.035e-16
ENSMUSG00000026621	2019-03-01	-1.697	0.000521494
ENSMUSG00000026622	NEK2	3.045	4.88078e-29
ENSMUSG00000026623	LPGAT1	-1.656	7.04886e-12
ENSMUSG00000026637	TRAF5	-1.048	9.01251e-09
ENSMUSG00000026638	IRF6	-1.646	0.000108782
ENSMUSG00000026639	LAMB3	-2.285	9.13188e-16
ENSMUSG00000026643	NMT2	1.469	1.86425e-18
ENSMUSG00000026646	SUV39H2	2.586	3.72514e-38
ENSMUSG00000026649	CFAP126	1.609	3.64399e-08
ENSMUSG00000026657	FRMD4A	2.845	1.10295e-41
ENSMUSG00000026662	SEPHS1	1.209	3.8208e-13
ENSMUSG00000026669	MCM10	2.86	2.4877e-09
ENSMUSG00000026670	UAP1	2.331	7.06649e-84
ENSMUSG00000026674	DDR2	-2.805	0.0246415
ENSMUSG00000026675	HSD17B7	-1.119	2.39784e-06
ENSMUSG00000026676	CCDC3	-3.475	0.0236197
ENSMUSG00000026679	ENKUR	1.093	9.09671e-05
ENSMUSG00000026683	NUF2	4.188	3.38533e-20
ENSMUSG00000026687	ALDH9A1	1.14	9.53243e-13
ENSMUSG00000026701	PRDX6	-1.538	0.0341061
ENSMUSG00000026708	CENPL	1.532	1.38753e-27
ENSMUSG00000026709	DARS2	1.031	4.4714e-14
ENSMUSG00000026721	RABGAP1L	-1.143	0.000328484
ENSMUSG00000026728	VIM	1.239	5.58847e-05
ENSMUSG00000026748	PLXDC2	2.739	4.41604e-09
ENSMUSG00000026750	PSMB7	1.162	5.5205e-25
ENSMUSG00000026766	MMADHC	1.066	2.61908e-19
ENSMUSG00000026768	ITGA8	-2.969	7.90298e-13
ENSMUSG00000026770	IL2RA	-1.153	4.29326e-05
ENSMUSG00000026773	PFKFB3	-1.264	0.000154485
ENSMUSG00000026779	MASTL	2.493	2.3618e-08
ENSMUSG00000026782	ABI2	-2.391	0.00183275
ENSMUSG00000026791	SLC2A8	1.253	2.6587e-13
ENSMUSG00000026796	FAM129B	1.847	2.29188e-07
ENSMUSG00000026797	STXBP1	2.351	2.49881e-09
ENSMUSG00000026811	ST6GALNAC6	1.368	2.1207e-16
ENSMUSG00000026814	ENG	1.34	5.85382e-06
ENSMUSG00000026815	GFI1B	2.683	2.00966e-05
ENSMUSG00000026816	GTF3C5	1.292	5.17579e-16
ENSMUSG00000026821	RALGDS	-1.59	3.91765e-11
ENSMUSG00000026822	LCN2	-1.563	0.0277744
ENSMUSG00000026825	DNM1	-2.381	0.02337
ENSMUSG00000026826	NR4A2	2.179	1.61669e-09
ENSMUSG00000026833	OLFM1	1.831	3.86257e-06
ENSMUSG00000026836	ACVR1	2.055	9.72534e-12
ENSMUSG00000026837	COL5A1	3.694	1.24161e-10
ENSMUSG00000026843	FUBP3	1.197	4.87032e-28
ENSMUSG00000026866	KYNU	-1.643	3.60613e-12
ENSMUSG00000026869	PSMD5	1.017	1.02389e-19
ENSMUSG00000026873	PHF19	1.626	2.50203e-12
ENSMUSG00000026875	TRAF1	-1.525	5.28017e-11
ENSMUSG00000026883	DAB2IP	-1.583	4.92719e-05
ENSMUSG00000026885	TTLL11	-2.864	0.00125719
ENSMUSG00000026893	GCA	-1.692	2.39784e-06
ENSMUSG00000026895	NDUFA8	1.071	8.16739e-14
ENSMUSG00000026914	PSMD14	1.191	1.39256e-28
ENSMUSG00000026919	LCN4	-1.269	0.00024892
ENSMUSG00000026921	EGFL7	4.558	5.29189e-20
ENSMUSG00000026923	NOTCH1	-1.669	1.43977e-07
ENSMUSG00000026926	PMPCA	1.061	3.79e-17
ENSMUSG00000026928	CARD9	-1.485	2.12795e-05
ENSMUSG00000026932	NACC2	-1.809	0.00692726
ENSMUSG00000026941	MAMDC4	-1.005	3.04649e-05
ENSMUSG00000026955	SAPCD2	4.016	2.34921e-13
ENSMUSG00000026961	LRRC26	-2.494	0.0107445
ENSMUSG00000026966	SSNA1	1.425	2.05634e-32
ENSMUSG00000026974	ZMYND19	1.653	3.54095e-27
ENSMUSG00000026980	LY75	-1.498	1.45379e-13
ENSMUSG00000026981	IL1RN	-1.486	0.0462617
ENSMUSG00000026986	HNMT	-2.003	4.62955e-05
ENSMUSG00000026988	WDSUB1	1.135	7.18898e-15
ENSMUSG00000026989	DAPL1	-1.531	0.000168779
ENSMUSG00000026991	PKP4	-1.471	6.14582e-05
ENSMUSG00000026994	GALNT3	-2.236	0.00225225
ENSMUSG00000027015	CYBRD1	1.809	2.64764e-05
ENSMUSG00000027018	HAT1	2.064	3.32104e-40
ENSMUSG00000027030	STK39	-1.263	6.06603e-05
ENSMUSG00000027035	CERS6	-1.381	0.00025893
ENSMUSG00000027067	SSRP1	1.067	9.48325e-10
ENSMUSG00000027068	DHRS9	-2.051	0.000741539
ENSMUSG00000027074	SLC43A3	2.458	4.17669e-05
ENSMUSG00000027075	SLC43A1	2.439	1.04719e-05
ENSMUSG00000027076	TIMM10	1.707	3.75683e-34
ENSMUSG00000027078	UBE2L6	-2.797	0.0105067
ENSMUSG00000027082	TFPI	-1.072	2.21731e-05
ENSMUSG00000027099	MTX2	1.439	5.02331e-19
ENSMUSG00000027108	OLA1	1.084	1.46516e-15
ENSMUSG00000027111	ITGA6	-2.51	0.00183806
ENSMUSG00000027115	KIF18A	1.566	4.54853e-08
ENSMUSG00000027134	LPCAT4	-1.404	6.30708e-05
ENSMUSG00000027160	CCDC34	1.464	1.96032e-17
ENSMUSG00000027167	ELP4	1.489	2.03444e-26
ENSMUSG00000027168	PAX6	4.968	1.14329e-08
ENSMUSG00000027171	PRRG4	-1.554	1.47932e-11
ENSMUSG00000027175	TCP11L1	-1.78	0.0101627
ENSMUSG00000027180	FBXO3	1.431	7.07363e-34
ENSMUSG00000027186	ELF5	-2.946	0.0111716
ENSMUSG00000027187	CAT	-2.207	0.0145589
ENSMUSG00000027188	PAMR1	-3.707	0.000198946
ENSMUSG00000027189	TRIM44	-1.256	4.71951e-14
ENSMUSG00000027193	API5	1.011	2.24715e-11
ENSMUSG00000027195	HSD17B12	1.037	8.14023e-11
ENSMUSG00000027199	GATM	1.169	0.0060672
ENSMUSG00000027200	SEMA6D	-2.365	0.00227316
ENSMUSG00000027202	SLC12A1	5.853	2.26403e-20
ENSMUSG00000027203	DUT	2.12	1.55356e-05
ENSMUSG00000027204	FBN1	-1.413	0.0273795
ENSMUSG00000027210	MEIS2	6.94	1.00626e-11
ENSMUSG00000027215	CD82	-1.128	2.98714e-05
ENSMUSG00000027219	SLC28A2	-1.747	3.94044e-15
ENSMUSG00000027220	SYT13	-2.157	0.0064709
ENSMUSG00000027221	CHST1	2.191	0.000851947
ENSMUSG00000027225	DUOXA2	-2.327	0.0117804
ENSMUSG00000027238	FRMD5	3.138	2.66243e-08
ENSMUSG00000027242	WDR76	1.035	4.36548e-13
ENSMUSG00000027248	PDIA3	1.089	3.33867e-12
ENSMUSG00000027249	F2	2.38	7.41047e-08
ENSMUSG00000027254	MAP1A	-2.872	0.00115631
ENSMUSG00000027257	PACSIN3	1.881	0.00915643
ENSMUSG00000027270	LAMP5	-2.621	0.0104007
ENSMUSG00000027285	HAUS2	1.077	7.86826e-11
ENSMUSG00000027293	EHD4	-1.682	0.00762951
ENSMUSG00000027297	LTK	-2.45	2.33543e-15
ENSMUSG00000027298	TYRO3	-1.427	0.000316289
ENSMUSG00000027303	PTPRA	1.071	3.35141e-17
ENSMUSG00000027313	CHAC1	-2.477	0.000679091
ENSMUSG00000027323	RAD51	3.516	5.63063e-72
ENSMUSG00000027324	RPUSD2	1.004	2.85995e-10
ENSMUSG00000027326	KNL1	1.938	0.000449985
ENSMUSG00000027329	SPEF1	2.173	4.37432e-35
ENSMUSG00000027331	KNSTRN	1.933	2.27412e-43
ENSMUSG00000027332	IVD	-1.459	1.12862e-14
ENSMUSG00000027339	RASSF2	-1.806	2.23659e-13
ENSMUSG00000027340	SLC23A2	-1.478	2.0274e-12
ENSMUSG00000027342	PCNA	1.762	2.3233e-29
ENSMUSG00000027344	FSIP1	-2.45	3.27568e-12
ENSMUSG00000027346	GPCPD1	-1.419	3.90327e-08
ENSMUSG00000027347	RASGRP1	-1.537	3.8777e-09
ENSMUSG00000027351	SPRED1	2.022	3.50051e-22
ENSMUSG00000027353	MCM8	1.976	1.97998e-34
ENSMUSG00000027356	FERMT1	-3.527	0.0162938
ENSMUSG00000027357	CRLS1	1.364	9.03435e-23
ENSMUSG00000027358	BMP2	2.797	0.00027189
ENSMUSG00000027359	SLC27A2	-5.073	2.56641e-07
ENSMUSG00000027360	HDC	3.4	2.16603e-10
ENSMUSG00000027368	DUSP2	-1.93	6.52713e-12
ENSMUSG00000027375	MAL	-2.408	0.00543461
ENSMUSG00000027376	PROM2	-3.231	0.00848742
ENSMUSG00000027377	MALL	-2.188	0.0155582
ENSMUSG00000027378	NPHP1	3.437	7.76077e-16
ENSMUSG00000027379	BUB1	3.591	2.45716e-10
ENSMUSG00000027380	ACOXL	-1.375	0.000309251
ENSMUSG00000027398	IL1B	-2.663	1.47333e-05
ENSMUSG00000027399	IL1A	-2.069	0.0291656
ENSMUSG00000027401	TGM3	-2.596	2.25591e-11
ENSMUSG00000027404	SNRPB	1.273	6.61847e-15
ENSMUSG00000027412	LPIN3	-2.077	0.0117881
ENSMUSG00000027435	CD93	-1.464	0.00419154
ENSMUSG00000027452	ACSS1	1.245	7.02162e-16
ENSMUSG00000027454	GINS1	2.76	1.66888e-44
ENSMUSG00000027456	SDCBP2	-1.76	0.012617
ENSMUSG00000027463	SLC52A3	2.086	2.73002e-17
ENSMUSG00000027469	TPX2	2.663	4.34897e-05
ENSMUSG00000027488	SNTA1	-1.217	0.00433938
ENSMUSG00000027489	NECAB3	1.924	2.17221e-08
ENSMUSG00000027490	E2F1	2.444	4.40646e-28
ENSMUSG00000027496	AURKA	2.73	1.07803e-44
ENSMUSG00000027505	FAM209	-1.178	0.00430318
ENSMUSG00000027506	TPD52	-1.837	7.96992e-10
ENSMUSG00000027509	RAE1	1.009	1.9277e-10
ENSMUSG00000027513	PCK1	-4.411	0.00941999
ENSMUSG00000027514	ZBP1	-1.426	2.93166e-08
ENSMUSG00000027536	CHMP4C	-2.614	0.00167451
ENSMUSG00000027540	PTPN1	-1.041	0.00222714
ENSMUSG00000027544	NFATC2	-1.574	5.996e-14
ENSMUSG00000027546	ATP9A	-1.919	0.00141898
ENSMUSG00000027555	CAR13	5.345	1.24731e-38
ENSMUSG00000027556	CAR1	4.967	3.04055e-11
ENSMUSG00000027559	CAR3	6.173	3.60453e-08
ENSMUSG00000027570	COL9A3	-1.701	1.20922e-08
ENSMUSG00000027573	GID8	1.128	4.87879e-09
ENSMUSG00000027579	SRMS	-2.657	4.4183e-14
ENSMUSG00000027580	HELZ2	-1.364	3.35586e-07
ENSMUSG00000027599	ARMC1	1.001	2.6499e-15
ENSMUSG00000027605	ACSS2	1.513	1.28625e-18
ENSMUSG00000027613	EIF6	1.031	9.6315e-18
ENSMUSG00000027634	NDRG3	1.499	7.12843e-30
ENSMUSG00000027635	DSN1	1.573	2.58506e-30
ENSMUSG00000027642	RPN2	1.265	2.0094e-25
ENSMUSG00000027646	SRC	-2.842	0.000315576
ENSMUSG00000027654	FAM83D	1.651	5.52912e-05
ENSMUSG00000027669	GNB4	4.452	8.52584e-86
ENSMUSG00000027671	ACTL6A	1.314	3.6745e-19
ENSMUSG00000027676	CCDC39	5.441	1.39707e-09
ENSMUSG00000027684	MECOM	-2.575	0.0412172
ENSMUSG00000027699	ECT2	2.812	2.10358e-16
ENSMUSG00000027708	DCUN1D1	-1.395	0.0154907
ENSMUSG00000027709	MCCC1	-1.014	1.37876e-11
ENSMUSG00000027712	ANXA5	1.359	0.00117382
ENSMUSG00000027713	1810062G17RIK	1.264	2.64396e-06
ENSMUSG00000027737	SLC7A11	-2.41	0.0043297
ENSMUSG00000027742	COG6	1.069	6.26014e-28
ENSMUSG00000027752	EXOSC8	1.674	3.99146e-22
ENSMUSG00000027761	AADAC	-3.726	0.0390592
ENSMUSG00000027774	GFM1	1.185	3.14076e-19
ENSMUSG00000027776	IL12A	-1.74	3.74723e-12
ENSMUSG00000027778	IFT80	-1.216	8.58975e-09
ENSMUSG00000027800	TM4SF1	-2.805	0.0158413
ENSMUSG00000027803	WWTR1	-2.941	0.00158644
ENSMUSG00000027805	PFN2	-1.517	4.74317e-10
ENSMUSG00000027809	ETFDH	1.318	1.16709e-21
ENSMUSG00000027810	EIF2A	1.111	8.48988e-11
ENSMUSG00000027811	4930579G24RIK	2.089	1.89757e-34
ENSMUSG00000027834	SERPINI1	-1.301	4.74913e-14
ENSMUSG00000027843	PTPN22	-1.304	5.89525e-13
ENSMUSG00000027848	OLFML3	-1.445	0.00051189
ENSMUSG00000027858	TSPAN2	-3.547	8.9889e-06
ENSMUSG00000027863	CD2	-1.55	8.6336e-10
ENSMUSG00000027867	SPAG17	-2.042	0.0139382
ENSMUSG00000027875	HMGCS2	4.955	8.16322e-06
ENSMUSG00000027883	GPSM2	1.893	2.03677e-09
ENSMUSG00000027889	AMPD2	1.625	9.43122e-28
ENSMUSG00000027895	KCNC4	3.896	4.74055e-09
ENSMUSG00000027896	SLC16A4	-1.274	0.0178375
ENSMUSG00000027901	DENND2D	-1.924	1.69813e-29
ENSMUSG00000027907	S100A11	-1.366	0.000415776
ENSMUSG00000027939	NUP210L	-1.102	5.73715e-08
ENSMUSG00000027947	IL6RA	-1.485	1.91782e-07
ENSMUSG00000027954	EFNA1	-1.693	0.00162542
ENSMUSG00000027955	FAM198B	3.789	9.32195e-21
ENSMUSG00000027957	SLC35A3	1.262	7.45645e-16
ENSMUSG00000027963	EXTL2	1.993	1.21895e-32
ENSMUSG00000027968	LARP7	1.187	8.66534e-18
ENSMUSG00000027977	NDST3	4.101	0.000285537
ENSMUSG00000027978	PRSS12	-1.802	3.08097e-09
ENSMUSG00000027983	CYP2U1	-1.391	1.29006e-05
ENSMUSG00000027984	HADH	1.61	3.82731e-39
ENSMUSG00000027985	LEF1	-1.82	4.64829e-07
ENSMUSG00000027993	TRIM2	-1.283	0.00841178
ENSMUSG00000027995	TLR2	-1.597	0.00157812
ENSMUSG00000028005	GUCY1B1	-2.946	0.000740579
ENSMUSG00000028010	GAR1	1.383	1.73911e-19
ENSMUSG00000028013	PPA2	1.207	2.41114e-32
ENSMUSG00000028017	EGF	-1.083	0.000763079
ENSMUSG00000028018	GSTCD	1.124	2.15313e-09
ENSMUSG00000028028	ALPK1	-1.201	4.15818e-06
ENSMUSG00000028029	AIMP1	1.131	2.09153e-19
ENSMUSG00000028037	IFI44	-1.908	3.12331e-05
ENSMUSG00000028044	CKS1B	3.556	5.65645e-60
ENSMUSG00000028051	HCN3	-1.363	1.16605e-06
ENSMUSG00000028068	IQGAP3	2.985	6.73157e-06
ENSMUSG00000028070	NAXE	1.242	5.82628e-28
ENSMUSG00000028071	SH2D2A	-1.403	1.02951e-07
ENSMUSG00000028073	PEAR1	-2.067	1.47291e-09
ENSMUSG00000028076	CD1D1	-1.505	1.23324e-13
ENSMUSG00000028078	DCLK2	-1.088	9.32014e-07
ENSMUSG00000028088	FMO5	-1.823	0.000162647
ENSMUSG00000028104	POLR3GL	1.658	5.2388e-28
ENSMUSG00000028108	ECM1	-2.085	0.00993488
ENSMUSG00000028121	BCAR3	-1.613	2.31439e-16
ENSMUSG00000028124	GCLM	-1.953	0.0269503
ENSMUSG00000028145	THEM4	-1.3	4.56243e-08
ENSMUSG00000028150	RORC	-1.88	5.31601e-05
ENSMUSG00000028152	TSPAN5	1.116	2.62886e-13
ENSMUSG00000028156	EIF4E	1.087	4.30686e-14
ENSMUSG00000028159	DAPP1	1.353	7.73035e-06
ENSMUSG00000028184	ADGRL2	2.274	1.72686e-06
ENSMUSG00000028185	DNASE2B	4.457	4.81225e-27
ENSMUSG00000028188	SPATA1	-1.373	0.000673107
ENSMUSG00000028207	ASPH	2.309	3.86679e-07
ENSMUSG00000028212	CCNE2	1.582	0.0279305
ENSMUSG00000028217	CDH17	-1.361	1.88085e-06
ENSMUSG00000028223	DECR1	3.255	9.92805e-94
ENSMUSG00000028224	NBN	2.085	2.77694e-56
ENSMUSG00000028256	ODF2L	1.407	8.23346e-24
ENSMUSG00000028262	CLCA3A2	2.366	0.00405618
ENSMUSG00000028264	SPACA1	-1.645	9.04871e-05
ENSMUSG00000028268	GBP3	-1.131	4.52542e-10
ENSMUSG00000028278	RRAGD	-1.394	0.000769342
ENSMUSG00000028289	EPHA7	5.853	1.1727e-31
ENSMUSG00000028312	SMC2	2.105	9.08838e-40
ENSMUSG00000028333	ANP32B	1.008	0.00220975
ENSMUSG00000028334	NANS	1.984	2.40295e-47
ENSMUSG00000028337	CORO2A	2.31	3.46299e-43
ENSMUSG00000028354	FMN2	3.334	4.47953e-11
ENSMUSG00000028362	TNFSF8	-1.049	0.000611218
ENSMUSG00000028367	TXN1	1.091	5.81564e-06
ENSMUSG00000028378	PTGR1	1.618	1.22487e-05
ENSMUSG00000028381	NA	1.18	1.89148e-13
ENSMUSG00000028385	SNX30	-1.603	1.49081e-13
ENSMUSG00000028392	BSPRY	-2.011	0.00105279
ENSMUSG00000028393	ALAD	2.175	4.99226e-32
ENSMUSG00000028394	POLE3	1.127	1.33151e-05
ENSMUSG00000028398	DMAC1	1.157	1.24459e-05
ENSMUSG00000028399	PTPRD	6.52	0.000999269
ENSMUSG00000028412	SLC44A1	-3.22	6.90433e-05
ENSMUSG00000028434	EPB41L4B	-1.201	0.0202343
ENSMUSG00000028435	AQP3	-1.336	0.0392606
ENSMUSG00000028436	DCAF12	-2.712	0.0049391
ENSMUSG00000028438	KIF24	1.68	3.62821e-06
ENSMUSG00000028443	NUDT2	1.729	1.13899e-23
ENSMUSG00000028455	STOML2	1.512	5.6036e-33
ENSMUSG00000028456	UNC13B	3.721	2.44586e-10
ENSMUSG00000028457	ATP8B5	4.427	1.44405e-10
ENSMUSG00000028459	CD72	-1.821	4.46763e-13
ENSMUSG00000028460	SIT1	-1.288	5.74986e-08
ENSMUSG00000028463	CAR9	1.851	5.01927e-11
ENSMUSG00000028464	TPM2	-2.098	0.0238326
ENSMUSG00000028469	NPR2	1.224	0.00157335
ENSMUSG00000028470	HINT2	1.287	4.06366e-20
ENSMUSG00000028484	PSIP1	1.529	1.20355e-38
ENSMUSG00000028497	HACD4	-2.806	0.000401926
ENSMUSG00000028514	USP24	1.179	1.24024e-20
ENSMUSG00000028517	PLPP3	-1.966	3.14062e-08
ENSMUSG00000028518	PRKAA2	-4.03	1.39272e-05
ENSMUSG00000028521	SLC35D1	2.469	8.88181e-79
ENSMUSG00000028524	SGIP1	5.206	1.4999e-20
ENSMUSG00000028525	PDE4B	-1.973	5.20086e-13
ENSMUSG00000028528	DNAJC6	3.431	1.62254e-40
ENSMUSG00000028536	2610528J11RIK	-2.601	0.00179896
ENSMUSG00000028541	B4GALT2	1.786	1.93467e-06
ENSMUSG00000028542	SLC6A9	2.1	0.00590297
ENSMUSG00000028544	SLC5A9	-3.333	0.0134375
ENSMUSG00000028545	BEND5	-2.006	2.86734e-18
ENSMUSG00000028551	CDKN2C	2.269	1.87361e-08
ENSMUSG00000028557	RNF11	-2.413	0.0045146
ENSMUSG00000028558	CALR4	-3.12	5.25463e-06
ENSMUSG00000028560	USP1	1.23	8.90606e-19
ENSMUSG00000028565	NFIA	3.227	5.8133e-64
ENSMUSG00000028572	HOOK1	-1.64	9.13188e-16
ENSMUSG00000028573	FGGY	-1.398	3.08451e-06
ENSMUSG00000028587	ORC1	1.622	0.0195942
ENSMUSG00000028599	TNFRSF1B	-1.098	0.00126877
ENSMUSG00000028600	PODN	-2.965	0.00119695
ENSMUSG00000028607	CPT2	1.015	3.37567e-08
ENSMUSG00000028609	MAGOH	1.202	6.8974e-16
ENSMUSG00000028613	LRP8	1.754	5.28583e-08
ENSMUSG00000028614	NDC1	1.805	1.38645e-46
ENSMUSG00000028617	LRRC42	1.718	7.9285e-30
ENSMUSG00000028633	CTPS	2.016	1.8283e-60
ENSMUSG00000028634	HIVEP3	-1.336	8.16442e-07
ENSMUSG00000028637	CCDC30	-1.361	9.42711e-05
ENSMUSG00000028641	P3H1	1.439	3.05434e-16
ENSMUSG00000028643	SVBP	1.461	5.58902e-08
ENSMUSG00000028644	ERMAP	3.654	2.65999e-07
ENSMUSG00000028649	MACF1	-1.127	5.73022e-06
ENSMUSG00000028651	PPIE	1.152	5.30151e-17
ENSMUSG00000028671	GALE	1.298	0.000154413
ENSMUSG00000028678	KIF2C	4.014	3.76264e-18
ENSMUSG00000028687	MUTYH	-1.259	1.22759e-07
ENSMUSG00000028691	PRDX1	1.04	1.67403e-12
ENSMUSG00000028699	TSPAN1	-2.317	0.0107795
ENSMUSG00000028701	LURAP1	-1.069	0.00102812
ENSMUSG00000028702	RAD54L	3.424	1.02897e-46
ENSMUSG00000028703	LRRC41	1.465	1.982e-24
ENSMUSG00000028717	TAL1	1.836	0.00403138
ENSMUSG00000028718	STIL	3.092	3.51364e-08
ENSMUSG00000028729	EBNA1BP2	1.318	1.06956e-21
ENSMUSG00000028741	MRTO4	1.052	9.40512e-11
ENSMUSG00000028757	DDOST	1.517	1.11957e-28
ENSMUSG00000028763	HSPG2	-1.225	0.000164103
ENSMUSG00000028766	ALPL	-2.424	0.00763695
ENSMUSG00000028780	SEMA3C	-4.537	0.00174265
ENSMUSG00000028782	ADGRB2	-1.897	4.59373e-06
ENSMUSG00000028792	AK2	1.819	1.25944e-49
ENSMUSG00000028794	A3GALT2	-1.883	0.000182676
ENSMUSG00000028807	ZBTB8A	2.295	9.52542e-46
ENSMUSG00000028811	YARS	1.332	7.50649e-31
ENSMUSG00000028826	MACO1	1.026	2.63665e-18
ENSMUSG00000028832	STMN1	2.758	1.8169e-33
[truncated: 4,557 more rows]

## Sheet: Table S6 c3vsc2_DEG_table
Table S6 c3vsc2_DEG_table
gene	genesym	c3c2_logFC	c3c2_qval
ENSMUSG00000000120	NGFR	-1.023	0.0334886
ENSMUSG00000000204	SLFN4	-1.957	0.0287657
ENSMUSG00000000266	MID2	-2.65	0.0328924
ENSMUSG00000000308	CKMT1	-3.909	0.015691
ENSMUSG00000000325	ARVCF	1.18	0.00152319
ENSMUSG00000000326	COMT	1.146	0.00116231
ENSMUSG00000000385	TMPRSS2	-2.975	0.0269927
ENSMUSG00000000409	LCK	-1.088	0.0119148
ENSMUSG00000000552	ZFP385A	1.018	0.00281003
ENSMUSG00000000562	ADORA3	2.112	0.0106239
ENSMUSG00000000567	SOX9	-4.655	0.0206
ENSMUSG00000000579	DYNLT1C	-1.24	0.0389584
ENSMUSG00000000627	SEMA4F	-1.002	0.0197504
ENSMUSG00000000731	AIRE	-1.63	0.0146593
ENSMUSG00000000732	ICOSL	-1.357	0.000287099
ENSMUSG00000000901	MMP11	-1.472	0.00996269
ENSMUSG00000001027	SCN4A	-1.064	0.0116338
ENSMUSG00000001053	N4BP3	-1.332	0.000108051
ENSMUSG00000001095	SLC13A2	-3.259	0.00910778
ENSMUSG00000001313	RND2	1.53	0.0414023
ENSMUSG00000001380	HARS	1.046	2.54346e-06
ENSMUSG00000001507	ITGA3	-1.311	0.00737473
ENSMUSG00000001552	JUP	-1.62	0.0283913
ENSMUSG00000001604	TCEA3	-1.368	0.0253423
ENSMUSG00000001672	MARVELD3	-3.161	0.0221175
ENSMUSG00000001700	GRAMD3	-1.283	2.40081e-05
ENSMUSG00000002007	SRPK3	-1.447	0.00201979
ENSMUSG00000002020	LTBP2	-2.566	0.0481661
ENSMUSG00000002033	CD3G	-1.064	0.0155618
ENSMUSG00000002083	BBC3	1.248	2.60518e-05
ENSMUSG00000002249	TEAD3	-2.724	0.0243761
ENSMUSG00000002289	ANGPTL4	1.797	0.0143734
ENSMUSG00000002699	LCP2	1.072	0.0039085
ENSMUSG00000002771	GRIN2D	1.391	0.040531
ENSMUSG00000002885	ADGRE5	1.016	0.00792672
ENSMUSG00000002944	CD36	-2.606	0.0364267
ENSMUSG00000003051	ELF3	-3.281	0.00843946
ENSMUSG00000003283	HCK	-1.058	0.0117336
ENSMUSG00000003309	AP1M2	-1.206	0.0138824
ENSMUSG00000003418	ST8SIA6	-1.483	0.000698318
ENSMUSG00000003469	PHYHIP	-3.406	0.0178527
ENSMUSG00000003528	SLC25A1	1.196	7.09961e-05
ENSMUSG00000003746	MAN1A	-1.052	0.00154058
ENSMUSG00000003882	IL7R	-1.109	0.0221593
ENSMUSG00000004110	CACNA1E	-1.754	1.47864e-05
ENSMUSG00000004270	LPCAT3	1.293	0.000754102
ENSMUSG00000004317	CLCN5	1.023	0.000816426
ENSMUSG00000004383	LARGE1	-1.653	0.0273754
ENSMUSG00000004508	GAB2	1.821	0.00233826
ENSMUSG00000004562	ARHGEF40	1.5	0.0341198
ENSMUSG00000004633	CHN2	1.363	0.0135805
ENSMUSG00000004698	HDAC9	-1.27	0.000351395
ENSMUSG00000004837	GRAP	-1.19	0.000593297
ENSMUSG00000005251	RIPK4	-4.406	0.00137698
ENSMUSG00000005267	ZFP287	-1.387	3.97064e-05
ENSMUSG00000005338	CADM3	1.606	0.00669964
ENSMUSG00000005339	FCER1A	2	0.0469166
ENSMUSG00000005355	CASP14	-3.366	0.0222471
ENSMUSG00000005364	IL5RA	-1.417	0.00354472
ENSMUSG00000005547	CYP2A5	-3.718	0.0158303
ENSMUSG00000005583	MEF2C	-1.149	0.000617317
ENSMUSG00000005672	KIT	1.728	0.0331644
ENSMUSG00000005696	SH2D1A	-1.126	0.0116787
ENSMUSG00000005947	ITGAE	-1.26	0.00886458
ENSMUSG00000005958	EPHB3	-3.315	0.00637714
ENSMUSG00000005968	TUFT1	-2.385	0.00273364
ENSMUSG00000005973	RCN1	1.042	0.00341121
ENSMUSG00000006143	UPK3BL	-2.726	0.030777
ENSMUSG00000006169	CLINT1	1.064	3.66807e-05
ENSMUSG00000006360	CRIP1	1.459	6.85616e-05
ENSMUSG00000006369	FBLN1	-3.629	0.00722979
ENSMUSG00000006373	PGRMC1	1.044	0.0338547
ENSMUSG00000006411	NECTIN4	-2.28	0.0117902
ENSMUSG00000006442	SRM	1.058	0.00246753
ENSMUSG00000006575	RUNDC3A	-2.008	0.0253423
ENSMUSG00000006587	SNAI3	-1.382	0.00105644
ENSMUSG00000006763	SAAL1	1.261	0.000142267
ENSMUSG00000006777	KRT23	-3.368	0.0105619
ENSMUSG00000007034	SLC44A4	-3.15	0.0131256
ENSMUSG00000007039	DDAH2	1.759	0.000222124
ENSMUSG00000007041	CLIC1	1.115	0.000188722
ENSMUSG00000007279	SCUBE2	4.754	0.00874538
ENSMUSG00000007617	HOMER1	1.036	0.0107292
ENSMUSG00000007872	ID3	-1.037	0.0163999
ENSMUSG00000008136	FHL2	-1.833	0.00371076
ENSMUSG00000008193	SPIB	-1.136	0.0119982
ENSMUSG00000008575	NFIB	-3.323	0.0228839
ENSMUSG00000008601	RAB25	-2.689	0.00603591
ENSMUSG00000008734	GPRC5B	-1.574	0.00718207
ENSMUSG00000008999	BMP7	1.584	0.0175174
ENSMUSG00000009246	TRPM5	-1.475	0.0187153
ENSMUSG00000009292	TRPM2	-2.279	0.000325981
ENSMUSG00000009551	6330409D20RIK	-2.842	0.0151847
ENSMUSG00000009588	ST6GALNAC1	-3.534	0.0120194
ENSMUSG00000009628	TEX15	-1.822	0.0220782
ENSMUSG00000009739	POU6F1	-1.302	9.85326e-05
ENSMUSG00000010080	EPN3	-2.912	0.0149903
ENSMUSG00000010095	SLC3A2	1.128	0.0468814
ENSMUSG00000010601	APOL7A	-2.733	0.0277956
ENSMUSG00000010607	PIGYL	1.087	0.00207571
ENSMUSG00000010609	PSEN2	1.122	2.20834e-06
ENSMUSG00000010660	PLCD1	-1.877	0.0471638
ENSMUSG00000010663	FADS1	1.292	0.00121413
ENSMUSG00000010751	TNFRSF22	-1.074	0.0114894
ENSMUSG00000011008	MCOLN2	-1.343	0.000761343
ENSMUSG00000011034	SLC5A1	-3.03	0.0164774
ENSMUSG00000011256	ADAM19	-1.162	0.00629601
ENSMUSG00000011382	DHDH	1.055	0.0130227
ENSMUSG00000012123	CRYBG2	-2.543	0.0184059
ENSMUSG00000012519	MLKL	1.515	0.00328728
ENSMUSG00000012705	RETN	-1.939	0.0419453
ENSMUSG00000013338	FER1L4	-3.431	0.0164145
ENSMUSG00000013418	B4GALNT2	-1.706	0.00696794
ENSMUSG00000013523	BCAS1	-2.64	0.0243566
ENSMUSG00000013611	SNX31	-3.214	0.0102845
ENSMUSG00000013766	LY6G6E	-4.006	0.0156505
ENSMUSG00000014030	PAX5	-1.209	0.0109095
ENSMUSG00000014164	KLHL3	-1.251	0.00652433
ENSMUSG00000014453	BLK	-1.36	0.00077007
ENSMUSG00000014543	KLRA17	-1.609	0.0375958
ENSMUSG00000014686	CEACAM16	-1.521	0.0038145
ENSMUSG00000014725	ADAM28	-3.196	0.0240443
ENSMUSG00000014773	DLL1	-1.34	0.00940961
ENSMUSG00000014846	TPPP3	1.707	0.00726366
ENSMUSG00000014932	YES1	-1.464	0.00318155
ENSMUSG00000015093	CLIC3	-2.729	0.0154972
ENSMUSG00000015134	ALDH1A3	-3.977	0.0268933
ENSMUSG00000015202	CNKSR3	-1.105	1.13514e-06
ENSMUSG00000015217	HMGB3	1.164	0.0100616
ENSMUSG00000015314	SLAMF6	-1.387	0.000142267
ENSMUSG00000015476	PRRT1	-1.009	0.0208615
ENSMUSG00000015542	NAT9	1.129	0.00076278
ENSMUSG00000015597	ZFP318	-1.232	0.00147926
ENSMUSG00000015599	TTBK1	-1.773	5.89109e-05
ENSMUSG00000015968	CACNA1D	-1.057	0.0139623
ENSMUSG00000016028	NA	-1.123	0.00833451
ENSMUSG00000016194	HSD11B1	-1.058	0.00112889
ENSMUSG00000016200	SYT14	-3.149	0.0376113
ENSMUSG00000016382	PLS3	-3.005	0.0122866
ENSMUSG00000016526	DYRK3	1.54	0.00093209
ENSMUSG00000016624	PHF21B	-1.123	0.00578952
ENSMUSG00000016756	CMAH	-1.508	1.15552e-05
ENSMUSG00000017009	SDC4	-1.157	0.00389424
ENSMUSG00000017144	RND3	-1.367	0.023611
ENSMUSG00000017316	PPY	4.055	0.0155618
ENSMUSG00000017446	C1QTNF1	4.061	0.00299217
ENSMUSG00000017639	RAB11FIP4	-1.128	0.0167683
ENSMUSG00000017652	CD40	-1.016	0.0130573
ENSMUSG00000017692	RHBDL3	-1.892	0.00938043
ENSMUSG00000017697	ADA	1.432	0.00122471
ENSMUSG00000017756	SLC12A7	-1.198	0.00733017
ENSMUSG00000017897	EYA2	-1.233	0.0126937
ENSMUSG00000018001	CYTH3	1.087	0.0158324
ENSMUSG00000018166	ERBB3	1.291	0.0381656
ENSMUSG00000018168	IKZF3	-1.334	0.000931005
ENSMUSG00000018239	ZCCHC10	1.246	8.70326e-06
ENSMUSG00000018395	KIF3A	1.024	0.0103784
ENSMUSG00000018428	AKAP1	1.068	0.00814277
ENSMUSG00000018566	SLC2A4	-3.419	0.0396041
ENSMUSG00000018569	CLDN7	-3.724	0.00980689
ENSMUSG00000018698	LHX1	-3.304	0.00280626
ENSMUSG00000018849	WWC1	-3.215	0.0100181
ENSMUSG00000018907	ALOX12E	-4.972	0.000698318
ENSMUSG00000018924	ALOX15	-3.838	3.71824e-05
ENSMUSG00000018925	HEATR9	-1.065	0.0253423
ENSMUSG00000019139	ISYNA1	1.257	0.000188722
ENSMUSG00000019194	SCN1B	2.015	0.0344513
ENSMUSG00000019312	GRB7	-2.572	0.00117467
ENSMUSG00000019478	RAB4A	1.574	0.00737473
ENSMUSG00000019528	GYG	1.062	0.0108338
ENSMUSG00000019768	ESR1	-1.065	0.00216308
ENSMUSG00000019779	FRK	-2.809	0.0282526
ENSMUSG00000019842	TRAF3IP2	-1.171	0.000771881
ENSMUSG00000019849	PREP	1.132	0.0404934
ENSMUSG00000019853	HEBP2	-4.674	0.00339905
ENSMUSG00000019889	PTPRK	-2.803	0.0146479
ENSMUSG00000019944	RHOBTB1	1.835	0.000385194
ENSMUSG00000019982	MYB	1.006	0.00284956
ENSMUSG00000019989	ENPP3	-3.286	0.0142049
ENSMUSG00000019996	MAP7	1.08	0.0220984
ENSMUSG00000019997	CCN2	-3.694	0.0435844
ENSMUSG00000020010	VNN3	-1.532	0.040531
ENSMUSG00000020023	TMCC3	1.197	0.00383113
ENSMUSG00000020032	NUAK1	1.554	0.0163897
ENSMUSG00000020042	BTBD11	-1.266	0.000855646
ENSMUSG00000020062	SLC5A8	-3.212	0.0127547
ENSMUSG00000020085	AIFM2	1.302	0.0230714
ENSMUSG00000020099	UNC5B	-3.277	0.0196173
ENSMUSG00000020108	DDIT4	1.52	0.00189559
ENSMUSG00000020122	EGFR	-2.758	0.0227435
ENSMUSG00000020173	COBL	-2.926	0.0276226
ENSMUSG00000020182	DDC	2.154	0.0476312
ENSMUSG00000020183	CPM	-1.299	0.000104672
ENSMUSG00000020262	ADARB1	-2.009	0.0476055
ENSMUSG00000020263	APPL2	-1.388	1.41624e-05
ENSMUSG00000020275	REL	-1.037	0.00207805
ENSMUSG00000020297	NSG2	-1.15	0.0171569
ENSMUSG00000020303	STC2	3.543	0.000318011
ENSMUSG00000020325	FSTL3	1.419	0.00382333
ENSMUSG00000020363	GFPT2	2.356	0.0413731
ENSMUSG00000020376	RNF130	1.42	0.00144914
ENSMUSG00000020399	HAVCR2	1.656	0.00142002
ENSMUSG00000020401	FAM71B	-1.624	0.002228
ENSMUSG00000020419	HORMAD2	-2.761	0.0457246
ENSMUSG00000020424	CASTOR1	1.184	0.00128546
ENSMUSG00000020467	EFEMP1	-4.316	0.0193601
ENSMUSG00000020547	BZW2	1.442	2.40081e-05
ENSMUSG00000020577	TSPAN13	1.051	0.000219534
ENSMUSG00000020592	SDC1	-1.936	0.00676326
ENSMUSG00000020607	FAM84A	-2.884	0.0215101
ENSMUSG00000020653	KLF11	1.747	0.000112103
ENSMUSG00000020654	ADCY3	-1.166	0.000306437
ENSMUSG00000020669	SH3YL1	-2.321	0.0468814
ENSMUSG00000020773	TRIM47	1.721	0.0238427
ENSMUSG00000020841	CPD	1.633	0.0211113
ENSMUSG00000020847	RPH3AL	-1.353	0.0440388
ENSMUSG00000020893	PER1	1.339	0.00968036
ENSMUSG00000020901	PIK3R5	-1.187	0.00350741
ENSMUSG00000020905	USP43	-4.627	0.00441674
ENSMUSG00000020911	KRT19	-3.336	0.0151644
ENSMUSG00000020990	CDKL1	-2.539	0.00781992
ENSMUSG00000021087	RTN1	-1.355	0.00383113
ENSMUSG00000021108	PRKCH	-1.173	0.000270621
ENSMUSG00000021171	ESYT2	1.116	6.26263e-06
ENSMUSG00000021196	PFKP	1.438	3.08047e-07
ENSMUSG00000021203	OTUB2	1.202	0.00922744
ENSMUSG00000021262	EVL	-1.176	0.00027266
ENSMUSG00000021263	DEGS2	-1.425	0.00610702
ENSMUSG00000021265	SLC25A29	-1.078	0.010469
ENSMUSG00000021273	FDFT1	1.05	0.00334693
ENSMUSG00000021298	GPR132	-1.007	0.00804982
ENSMUSG00000021313	RYR2	-1.128	0.0192328
ENSMUSG00000021336	SLC17A4	2.78	0.0141177
ENSMUSG00000021359	TFAP2A	-2.864	0.0245659
ENSMUSG00000021362	GCM2	1.356	0.0354437
ENSMUSG00000021411	PXDC1	-1.182	0.000453822
ENSMUSG00000021492	F12	-2.393	0.00103671
ENSMUSG00000021509	SLC25A48	-3.406	0.0066325
ENSMUSG00000021552	GKAP1	1.067	0.0216433
ENSMUSG00000021553	SLC28A3	-3.306	0.00987947
ENSMUSG00000021565	SLC6A19	-1.322	0.0149986
ENSMUSG00000021573	TPPP	1.602	0.00574407
ENSMUSG00000021587	PCSK1	-1.316	0.035771
ENSMUSG00000021611	TERT	-1.225	0.00441587
ENSMUSG00000021638	OCLN	-3.317	0.00754893
ENSMUSG00000021640	NAIP1	-2.595	0.0292117
ENSMUSG00000021643	SERF1	1.329	0.00858325
ENSMUSG00000021701	PLK2	-2.345	0.00754622
ENSMUSG00000021719	RGS7BP	3.693	0.00308427
ENSMUSG00000021725	PARP8	-1.217	0.00082956
ENSMUSG00000021749	OIT1	-3.736	0.0340789
ENSMUSG00000021782	DLG5	-2.07	0.00758684
ENSMUSG00000021796	BMPR1A	-1.448	0.0173378
ENSMUSG00000021830	TXNDC16	-1.182	0.00193515
ENSMUSG00000021831	ERO1L	1.538	0.00038031
ENSMUSG00000021838	SAMD4	-2.957	0.0459801
ENSMUSG00000021892	SH3BP5	-1.131	0.000238478
ENSMUSG00000021950	ANXA8	-4.261	0.00792152
ENSMUSG00000021957	TKT	1.034	0.00120998
ENSMUSG00000021986	AMER2	-1.898	0.0289005
ENSMUSG00000022048	DPYSL2	1.091	1.33534e-05
ENSMUSG00000022090	PDLIM2	-1.091	0.00152738
ENSMUSG00000022091	SORBS3	-1.727	0.000588579
ENSMUSG00000022123	SCEL	-3.28	0.00545402
ENSMUSG00000022146	OSMR	-2.764	0.0377485
ENSMUSG00000022157	MCPT8	2.299	0.0279359
ENSMUSG00000022180	SLC7A8	2.846	2.01249e-05
ENSMUSG00000022211	CARMIL3	-1.086	0.0150413
ENSMUSG00000022225	CMA1	4.621	3.17239e-06
ENSMUSG00000022257	LAPTM4B	-1.22	0.0451796
ENSMUSG00000022270	RETREG1	-1.026	0.00024439
ENSMUSG00000022305	LRP12	1.836	0.000554943
ENSMUSG00000022351	SQLE	1.19	0.027693
ENSMUSG00000022358	FBXO32	-1.375	1.95732e-07
ENSMUSG00000022382	WNT7B	-4.116	0.0128855
ENSMUSG00000022416	CACNA1I	-1.468	0.000720393
ENSMUSG00000022419	DEPTOR	1.062	0.013078
ENSMUSG00000022441	EFCAB6	-3.351	0.0147446
ENSMUSG00000022453	NAGA	1.045	0.00197654
ENSMUSG00000022505	EMP2	-3.895	0.00388421
ENSMUSG00000022510	TRP63	-5.713	0.0416624
ENSMUSG00000022512	CLDN1	-2.503	0.0195852
ENSMUSG00000022533	ATP13A3	1.202	6.92188e-07
ENSMUSG00000022550	ADCK5	1.025	0.00180161
ENSMUSG00000022565	PLEC	1.25	0.000868551
ENSMUSG00000022574	NAPRT	1.238	0.000564
ENSMUSG00000022594	LYNX1	-1.113	0.0196827
ENSMUSG00000022598	PSCA	-3.057	0.0301107
ENSMUSG00000022610	MAPK12	-1.566	0.000476052
ENSMUSG00000022629	KIF21A	-5.469	0.00323643
ENSMUSG00000022636	ALCAM	-1.552	7.19537e-05
ENSMUSG00000022661	CD200	-1.047	0.00633481
ENSMUSG00000022686	B3GNT5	-1.288	0.00164043
ENSMUSG00000022696	SIDT1	-1.388	0.000112103
ENSMUSG00000022708	ZBTB20	-1.004	0.00111916
ENSMUSG00000022723	CRYBG3	-1.113	0.00015085
ENSMUSG00000022747	ST3GAL6	-1.262	3.71653e-05
ENSMUSG00000022750	KLHL22	1.091	0.000753779
ENSMUSG00000022773	YPEL1	-1.028	0.0217986
ENSMUSG00000022865	CXADR	-2.58	0.0079009
ENSMUSG00000022876	SAMSN1	1.319	0.00793835
ENSMUSG00000022883	ROBO1	-2.478	0.0244262
ENSMUSG00000022900	ILDR1	-1.809	0.0123477
ENSMUSG00000022949	CLIC6	-3.949	0.0359971
ENSMUSG00000022952	RUNX1	1.016	2.33001e-05
ENSMUSG00000022986	KRT75	-2.997	0.0475638
ENSMUSG00000023009	NCKAP5L	-1.242	0.00105109
ENSMUSG00000023039	KRT7	-3.001	0.0160846
ENSMUSG00000023041	KRT6B	-3.71	0.00643483
ENSMUSG00000023084	LRRC71	-1.632	0.0143264
ENSMUSG00000023104	RFC2	1.176	2.54652e-05
ENSMUSG00000023186	VWA5A	1.068	0.0118387
ENSMUSG00000023232	SERINC2	-3.071	0.0256335
ENSMUSG00000023243	KCNK5	1.322	0.00291823
ENSMUSG00000023267	GABRR2	-1.334	0.0195599
ENSMUSG00000023341	MX2	-1.133	0.0226761
ENSMUSG00000023467	TULP2	2.252	0.0133047
ENSMUSG00000023571	C1QTNF12	1.32	0.0114012
ENSMUSG00000023806	RSPH3B	1.069	0.0206
ENSMUSG00000023809	RPS6KA2	1.726	0.00326687
ENSMUSG00000023830	IGF2R	-1.131	0.00111162
ENSMUSG00000023905	TNFRSF12A	1.165	0.00455731
ENSMUSG00000023909	PAQR4	1.126	0.0437639
ENSMUSG00000023912	SLC25A27	-2.064	7.59512e-08
ENSMUSG00000023918	ADGRF4	-3.742	0.0140191
ENSMUSG00000023927	SATB1	-1.361	0.000530532
ENSMUSG00000023959	CLIC5	-3.116	0.0112911
ENSMUSG00000023961	ENPP4	1.486	0.000238478
ENSMUSG00000023968	CRIP3	-1.76	0.00479316
ENSMUSG00000023979	GUCA1B	-1.025	0.0345378
ENSMUSG00000024013	FGD2	-1.102	0.00207805
ENSMUSG00000024042	SIK1	-1.008	0.0379532
ENSMUSG00000024059	CLIP4	-5.947	0.000331233
ENSMUSG00000024098	TWSG1	1.178	0.000989191
ENSMUSG00000024112	CACNA1H	-1.249	0.0134019
ENSMUSG00000024190	DUSP1	-1.227	0.0424133
ENSMUSG00000024215	SPDEF	-3.67	0.0244613
ENSMUSG00000024222	FKBP5	1.025	0.0106097
ENSMUSG00000024330	COL11A2	-1.402	0.00024439
ENSMUSG00000024331	DSC2	-5.559	0.00250203
ENSMUSG00000024340	BTNL2	-1.502	0.000450723
ENSMUSG00000024353	MZB1	-1.242	0.00371718
ENSMUSG00000024399	LTB	-1.246	0.000829039
ENSMUSG00000024402	LTA	-1.404	0.000373548
ENSMUSG00000024421	LAMA3	-2.901	0.033411
ENSMUSG00000024430	CABYR	1.367	0.0369078
ENSMUSG00000024451	ARAP3	1.154	0.0474663
ENSMUSG00000024479	MAL2	-3.618	0.00813447
ENSMUSG00000024486	HBEGF	-2.939	0.0155276
ENSMUSG00000024526	CIDEA	-2.878	0.0274847
ENSMUSG00000024548	SETBP1	-1.173	0.00157036
ENSMUSG00000024570	RBFA	1.06	4.46711e-06
ENSMUSG00000024597	SLC12A2	-1.015	0.0456434
ENSMUSG00000024669	CD5	-1.13	0.0194952
ENSMUSG00000024670	CD6	-1.07	0.013839
ENSMUSG00000024673	MS4A1	-1.01	0.0331837
ENSMUSG00000024677	MS4A6B	-1.059	0.00922975
ENSMUSG00000024680	MS4A2	1.792	0.0495587
ENSMUSG00000024776	STAMBPL1	-1.178	0.00098992
ENSMUSG00000024778	FAS	-1.18	0.0179692
ENSMUSG00000024793	TNFRSF25	-1.25	0.00312286
ENSMUSG00000024810	IL33	-4.72	0.0383818
ENSMUSG00000024899	PAPSS2	2.283	0.00916057
ENSMUSG00000024900	CPT1A	1.165	0.00762564
ENSMUSG00000024901	PELI3	-1.264	0.040348
ENSMUSG00000024922	OVOL1	-3.5	0.00186212
ENSMUSG00000024935	SLC1A1	-2.751	0.0245159
ENSMUSG00000024948	MAP4K2	-1.04	0.00195116
ENSMUSG00000024987	CYP26A1	2.175	0.0120506
ENSMUSG00000024989	CEP55	1.561	0.001124
ENSMUSG00000025068	GSTO1	-2.957	0.0244858
ENSMUSG00000025085	ABLIM1	-1.14	0.00392389
ENSMUSG00000025092	HSPA12A	-1.003	0.0368215
ENSMUSG00000025104	HDGFL3	-1.201	0.0029238
ENSMUSG00000025150	CBR2	-3.289	0.0277
ENSMUSG00000025227	MFSD13A	1.292	0.0079009
ENSMUSG00000025277	ABHD6	-1.087	0.00530924
ENSMUSG00000025278	FLNB	1.073	0.00443326
ENSMUSG00000025279	DNASE1L3	-1.103	0.0108206
ENSMUSG00000025352	GDF11	-1.259	0.00352942
ENSMUSG00000025372	BAIAP2	-1.512	8.20444e-05
ENSMUSG00000025380	FSCN2	-2.105	0.0382497
ENSMUSG00000025401	MYO1A	-1.324	0.0206
ENSMUSG00000025429	PSTPIP2	1.342	0.00645265
ENSMUSG00000025461	CD163L1	-1.393	0.0204593
ENSMUSG00000025491	IFITM1	-2.353	0.00805752
ENSMUSG00000025500	LMNTD2	-1.331	0.00164396
ENSMUSG00000025504	EPS8L2	-2.963	0.0147446
ENSMUSG00000025511	TSPAN4	1.014	0.0286951
ENSMUSG00000025555	FARP1	-1.329	0.033017
ENSMUSG00000025557	SLC15A1	-2.956	0.0101486
ENSMUSG00000025648	PFKFB4	-1.146	0.0352242
ENSMUSG00000025701	ALOX5	2.165	0.00466484
ENSMUSG00000025746	IL6	3.093	0.00155607
ENSMUSG00000025754	AGBL1	-2.106	0.00133448
ENSMUSG00000025780	ITIH5	1.202	0.0228561
ENSMUSG00000025812	PARD3	-3.125	0.00848503
ENSMUSG00000025885	MYO5B	-3.573	0.0174074
ENSMUSG00000025932	EYA1	-1.661	8.82122e-05
ENSMUSG00000025978	RFTN2	-1.036	0.0294165
ENSMUSG00000025997	IKZF2	1.493	0.00373865
ENSMUSG00000026011	CTLA4	-1.061	0.0350762
ENSMUSG00000026012	CD28	-1.184	0.0105609
ENSMUSG00000026024	ALS2	1.291	1.64391e-07
ENSMUSG00000026068	IL18RAP	-1.062	0.0417736
ENSMUSG00000026069	IL1RL1	2.302	0.00302574
ENSMUSG00000026073	IL1R2	-1.871	0.0407401
ENSMUSG00000026080	CHST10	-1.166	0.00152628
ENSMUSG00000026113	INPP4A	-1.15	0.046394
ENSMUSG00000026153	FAM135A	-2.227	0.00685724
ENSMUSG00000026170	CYP27A1	-1.169	0.00105302
ENSMUSG00000026185	IGFBP5	-3.767	0.0340274
ENSMUSG00000026220	SLC16A14	-2.374	0.00300631
ENSMUSG00000026235	EPHA4	-2.236	0.020021
ENSMUSG00000026278	BOK	-3.768	0.0474969
ENSMUSG00000026327	SERPINB11	-3.389	0.0138824
ENSMUSG00000026347	TMEM163	-1.298	0.000228642
ENSMUSG00000026358	RGS1	2.302	0.00136631
ENSMUSG00000026383	EPB41L5	-1.482	0.000698318
ENSMUSG00000026385	DBI	1.071	0.00868469
ENSMUSG00000026395	PTPRC	-1.063	0.0190543
ENSMUSG00000026407	CACNA1S	-1.365	0.00452254
ENSMUSG00000026411	TMEM9	1.171	0.00368196
ENSMUSG00000026417	PIGR	-3.059	0.0141297
ENSMUSG00000026427	EIF2D	1.062	9.57127e-06
ENSMUSG00000026450	CHIT1	-3.183	0.0204769
ENSMUSG00000026482	RGL1	1.284	0.000137678
ENSMUSG00000026535	IFI202B	-3.266	0.0332639
ENSMUSG00000026558	UCK2	1.176	0.000230589
ENSMUSG00000026573	XCL1	-1.27	0.0248905
ENSMUSG00000026604	PTPN14	-1.633	0.00229601
ENSMUSG00000026616	CR2	-1.183	0.0120712
ENSMUSG00000026638	IRF6	-1.685	0.0105609
ENSMUSG00000026639	LAMB3	-1.464	0.000668051
ENSMUSG00000026657	FRMD4A	1.468	0.000751357
ENSMUSG00000026670	UAP1	1.108	2.85353e-06
ENSMUSG00000026676	CCDC3	-4.933	0.0384456
ENSMUSG00000026679	ENKUR	1.409	0.0091801
ENSMUSG00000026728	VIM	1.624	0.00721294
ENSMUSG00000026768	ITGA8	-2.264	0.000178724
ENSMUSG00000026821	RALGDS	-1.014	0.007624
ENSMUSG00000026836	ACVR1	1.733	0.00491331
ENSMUSG00000026866	KYNU	-1.278	0.000534648
ENSMUSG00000026875	TRAF1	-1.246	0.000571085
ENSMUSG00000026923	NOTCH1	-1.062	0.0316905
ENSMUSG00000026961	LRRC26	-3.113	0.033942
ENSMUSG00000026980	LY75	-1.01	0.00157543
ENSMUSG00000026984	IL1F6	-3.069	0.0375958
ENSMUSG00000026985	IL1F8	-3.577	0.0294407
ENSMUSG00000026991	PKP4	-1.507	0.00813965
ENSMUSG00000026994	GALNT3	-2.716	0.0127866
ENSMUSG00000027030	STK39	-1.069	0.0334023
ENSMUSG00000027134	LPCAT4	-1.545	0.00464429
ENSMUSG00000027171	PRRG4	-1.229	0.00084008
ENSMUSG00000027215	CD82	-1.075	0.0125728
ENSMUSG00000027219	SLC28A2	-1.191	0.000560657
ENSMUSG00000027297	LTK	-1.479	0.00207964
ENSMUSG00000027298	TYRO3	-1.742	0.00490268
ENSMUSG00000027313	CHAC1	-2.413	0.0233332
ENSMUSG00000027329	SPEF1	1.053	0.00271173
ENSMUSG00000027332	IVD	-1.045	0.000500671
ENSMUSG00000027339	RASSF2	-1.133	0.0029845
ENSMUSG00000027344	FSIP1	-1.713	0.00309586
ENSMUSG00000027346	GPCPD1	-1.052	0.0102845
ENSMUSG00000027347	RASGRP1	-1.096	0.00762564
ENSMUSG00000027351	SPRED1	1.658	7.70231e-05
ENSMUSG00000027359	SLC27A2	-3.216	0.0102471
ENSMUSG00000027360	HDC	2.622	0.0226299
ENSMUSG00000027375	MAL	-3.31	0.0101149
ENSMUSG00000027376	PROM2	-4.132	0.0205328
ENSMUSG00000027377	MALL	-3.287	0.0153421
ENSMUSG00000027398	IL1B	-1.88	0.0332664
ENSMUSG00000027401	TGM3	-1.584	0.0076204
ENSMUSG00000027412	LPIN3	-2.531	0.0419602
ENSMUSG00000027456	SDCBP2	-2.153	0.0463621
ENSMUSG00000027506	TPD52	-1.106	0.0166708
ENSMUSG00000027536	CHMP4C	-3.648	0.00323643
ENSMUSG00000027544	NFATC2	-1.043	0.00152077
ENSMUSG00000027579	SRMS	-1.736	0.00104969
ENSMUSG00000027605	ACSS2	1.121	0.00093209
ENSMUSG00000027669	GNB4	1.664	0.000385082
ENSMUSG00000027713	1810062G17RIK	1.483	0.0066325
ENSMUSG00000027803	WWTR1	-2.7	0.040578
ENSMUSG00000027843	PTPN22	-1.117	9.02365e-05
ENSMUSG00000027858	TSPAN2	-2.187	0.0457246
ENSMUSG00000027863	CD2	-1.106	0.0053757
ENSMUSG00000027889	AMPD2	1.083	0.000239746
ENSMUSG00000027901	DENND2D	-1.311	3.74904e-07
ENSMUSG00000027955	FAM198B	2.714	0.00114818
ENSMUSG00000027963	EXTL2	1.064	0.0013417
ENSMUSG00000027978	PRSS12	-1.493	0.00129661
ENSMUSG00000027984	HADH	1.107	3.55712e-06
ENSMUSG00000027985	LEF1	-1.347	0.0150806
ENSMUSG00000027993	TRIM2	-2.151	0.00459276
ENSMUSG00000028051	HCN3	-1.036	0.0230852
ENSMUSG00000028071	SH2D2A	-1.097	0.00865925
ENSMUSG00000028073	PEAR1	-1.262	0.0152048
ENSMUSG00000028104	POLR3GL	1.102	0.000219534
ENSMUSG00000028121	BCAR3	-1.08	0.000467549
ENSMUSG00000028185	DNASE2B	1.801	0.0362873
ENSMUSG00000028195	CCN1	-2.854	0.0367642
ENSMUSG00000028223	DECR1	1.352	2.95914e-05
ENSMUSG00000028278	RRAGD	-1.426	0.0272092
ENSMUSG00000028337	CORO2A	1.775	1.75283e-07
ENSMUSG00000028362	TNFSF8	-1.089	0.025021
ENSMUSG00000028392	BSPRY	-2.625	0.00438097
ENSMUSG00000028443	NUDT2	1.063	0.00135452
ENSMUSG00000028463	CAR9	1.484	0.00857677
ENSMUSG00000028518	PRKAA2	-2.488	0.0438386
ENSMUSG00000028521	SLC35D1	1.002	0.000143604
ENSMUSG00000028525	PDE4B	-1.133	0.00721307
ENSMUSG00000028528	DNAJC6	1.264	0.0168124
ENSMUSG00000028544	SLC5A9	-4.744	0.0153681
ENSMUSG00000028545	BEND5	-1.168	0.00108159
ENSMUSG00000028558	CALR4	-2.797	0.00697029
ENSMUSG00000028565	NFIA	1.01	0.0095446
ENSMUSG00000028572	HOOK1	-1.189	0.000206518
ENSMUSG00000028699	TSPAN1	-3.1	0.0215957
ENSMUSG00000028766	ALPL	-3.387	0.0115463
ENSMUSG00000028782	ADGRB2	-1.424	0.034231
ENSMUSG00000028807	ZBTB8A	1.219	0.000156098
ENSMUSG00000028838	EXTL1	-1.093	0.0130241
ENSMUSG00000028841	CNKSR1	-3.117	0.0115981
ENSMUSG00000028859	CSF3R	-1.838	0.0192689
ENSMUSG00000028860	SYTL1	-1.104	0.0107709
ENSMUSG00000028862	MAP3K6	1.359	0.038211
ENSMUSG00000028943	ESPN	1.499	0.000560657
ENSMUSG00000028967	ERRFI1	-2.274	0.0167683
ENSMUSG00000029053	PRKCZ	-1.342	0.000590109
ENSMUSG00000029086	PROM1	-3.524	0.0253423
ENSMUSG00000029093	SORCS2	-1.189	0.00328268
ENSMUSG00000029094	AFAP1	-1.257	0.00355704
ENSMUSG00000029095	ABLIM2	-1.61	0.00185939
ENSMUSG00000029130	RNF32	-1.77	0.00334693
ENSMUSG00000029154	CWH43	-4.326	0.00751907
ENSMUSG00000029162	KHK	1.339	8.89046e-06
ENSMUSG00000029185	FAM114A1	-1.161	0.0267265
ENSMUSG00000029188	SLC34A2	-3.454	0.00361446
ENSMUSG00000029228	LNX1	-2.876	0.0269801
ENSMUSG00000029254	STAP1	-1.262	0.000455614
ENSMUSG00000029298	GBP9	-1.243	0.000179544
ENSMUSG00000029304	SPP1	4.145	0.041051
ENSMUSG00000029314	GPAT3	-1.404	0.00484248
ENSMUSG00000029333	NA	-1.435	1.41503e-05
ENSMUSG00000029360	GM9754	-2.077	0.00270577
ENSMUSG00000029371	CXCL5	-3.772	0.0206
ENSMUSG00000029376	MTHFD2L	-2.162	0.0424013
ENSMUSG00000029377	EREG	-4.169	0.0169384
ENSMUSG00000029392	RILPL1	1.107	0.0236575
ENSMUSG00000029410	PPEF2	-1.033	0.023749
ENSMUSG00000029468	P2RX7	1.078	0.01509
ENSMUSG00000029470	P2RX4	1.338	4.26401e-05
ENSMUSG00000029499	PXMP2	1.014	0.0419226
ENSMUSG00000029510	GPC2	-1.464	0.0150806
ENSMUSG00000029552	TES	-1.032	0.000668051
ENSMUSG00000029602	RASAL1	-1.475	9.76786e-06
ENSMUSG00000029603	DTX1	-1.155	0.00490268
ENSMUSG00000029618	OCM	-3.364	0.0174426
ENSMUSG00000029641	RASL11A	2.083	0.0239348
ENSMUSG00000029658	WDR95	-1.393	0.0016846
ENSMUSG00000029672	FAM3C	1.551	4.74638e-07
ENSMUSG00000029718	PCOLCE	-2.888	0.0141866
ENSMUSG00000029797	SSPO	-1.523	0.00430676
ENSMUSG00000029804	HERC3	-1.093	1.76908e-05
ENSMUSG00000029816	GPNMB	4.466	0.0290519
ENSMUSG00000029832	NFE2L3	-3.217	0.0147446
ENSMUSG00000029859	EPHA1	-2.193	0.0189189
ENSMUSG00000030068	GM20696	-2.103	5.64564e-06
ENSMUSG00000030089	SLC41A3	1.474	5.98087e-05
ENSMUSG00000030103	BHLHE40	1.803	0.003986
ENSMUSG00000030110	RET	-1.225	0.0457057
ENSMUSG00000030117	GDF3	1.745	0.032255
ENSMUSG00000030144	CLEC4D	-1.675	0.0360377
ENSMUSG00000030149	KLRK1	-1.001	0.00982203
ENSMUSG00000030165	KLRD1	-1.104	0.00421733
ENSMUSG00000030167	KLRC1	-1.297	0.00237832
ENSMUSG00000030178	KLRA13-PS	-1.628	0.000452215
ENSMUSG00000030187	KLRA2	-1.339	0.0206528
ENSMUSG00000030208	EMP1	-3.089	0.0176946
ENSMUSG00000030231	PLEKHA5	-1.094	0.0002097
ENSMUSG00000030246	LDHB	-1.493	0.0108387
ENSMUSG00000030255	SSPN	-1.594	0.000757269
ENSMUSG00000030256	BHLHE41	-1.303	0.000761343
ENSMUSG00000030283	ST8SIA1	-1.421	0.0108338
ENSMUSG00000030336	CD27	-1.487	0.00124618
ENSMUSG00000030340	SCNN1A	-1.861	0.00110058
ENSMUSG00000030365	CLEC2I	-1.368	0.000449787
ENSMUSG00000030413	PGLYRP1	-2.669	0.0140274
ENSMUSG00000030443	ZFP583	-1.63	0.000943112
ENSMUSG00000030468	SIGLECG	-1.558	0.000852771
ENSMUSG00000030471	ZDHHC13	1.144	2.59604e-05
ENSMUSG00000030494	RHPN2	-2.718	0.0215107
ENSMUSG00000030510	CERS3	-3.486	0.0077208
ENSMUSG00000030528	BLM	1.205	6.00903e-05
ENSMUSG00000030530	FURIN	1.415	0.00290529
ENSMUSG00000030551	NR2F2	-3.699	0.00741157
ENSMUSG00000030553	PGPEP1L	-1.627	9.52524e-05
ENSMUSG00000030559	RAB38	2.167	0.0422743
ENSMUSG00000030577	CD22	-1.162	0.0141866
ENSMUSG00000030605	MFGE8	1.583	0.00741157
ENSMUSG00000030643	RAB30	-1.187	0.000870524
ENSMUSG00000030652	COQ7	1.027	0.00506613
ENSMUSG00000030653	GM45837	-1.006	0.000150727
ENSMUSG00000030660	PIK3C2A	-1.047	7.57898e-05
ENSMUSG00000030670	CYP2R1	-1.278	0.00290325
ENSMUSG00000030677	KIF22	1.033	0.0294198
ENSMUSG00000030693	KLK10	-3.389	0.0194526
ENSMUSG00000030699	TBX6	-1.367	0.00452452
ENSMUSG00000030724	CD19	-1.321	0.00207571
ENSMUSG00000030739	MYH14	-3.318	0.0104023
ENSMUSG00000030745	IL21R	-1.15	3.71824e-05
ENSMUSG00000030768	DISP1	1.215	0.000107165
ENSMUSG00000030774	PAK1	-1.342	0.00282425
ENSMUSG00000030775	TRAT1	-1.259	0.0304325
ENSMUSG00000030790	ADM	-2.043	0.00127132
ENSMUSG00000030800	PRSS8	-2.515	0.0418092
ENSMUSG00000030830	ITGAL	-1.061	0.0345378
ENSMUSG00000030839	SERGEF	1.134	0.000141835
ENSMUSG00000030852	TACC2	-1.638	0.00373892
ENSMUSG00000030930	CHST15	1.174	0.00182492
ENSMUSG00000030934	OAT	1.154	8.2815e-07
ENSMUSG00000030970	CTBP2	1.274	0.00770497
ENSMUSG00000031016	WEE1	1.744	5.70345e-05
ENSMUSG00000031024	ST5	-2.082	0.0494
ENSMUSG00000031028	TUB	-1.329	0.0124536
ENSMUSG00000031079	ZFP300	-1.175	0.0352231
ENSMUSG00000031089	SLC6A14	-3.048	0.0232107
ENSMUSG00000031098	SYT8	-3.519	0.00282712
ENSMUSG00000031146	PLP2	1.134	0.0256212
ENSMUSG00000031239	ITM2A	-1.137	0.00617896
ENSMUSG00000031258	XKRX	-1.362	0.00189444
ENSMUSG00000031274	COL4A5	-2.677	0.00218289
ENSMUSG00000031278	ACSL4	1.214	0.00156668
ENSMUSG00000031286	GLT28D2	-2.736	0.00898249
ENSMUSG00000031292	CDKL5	-1.474	5.84886e-05
ENSMUSG00000031327	CHIC1	-1.374	0.00101182
ENSMUSG00000031351	ZFP185	-2.897	0.0220687
ENSMUSG00000031372	TREX2	-3.103	0.00972265
ENSMUSG00000031382	ASB11	-2.585	0.0418582
ENSMUSG00000031387	RENBP	1.21	0.00837888
ENSMUSG00000031398	PLXNA3	-1.303	0.00185939
ENSMUSG00000031438	RNF128	2.211	0.0118255
ENSMUSG00000031480	THSD1	-1.335	0.0024223
ENSMUSG00000031497	TNFSF13B	-1.283	0.0349109
ENSMUSG00000031506	PTPN7	1.001	0.00121413
ENSMUSG00000031530	DUSP4	-1.352	0.00473546
ENSMUSG00000031548	SFRP1	-4.692	0.0394298
ENSMUSG00000031558	SLIT2	-3.754	0.00736225
ENSMUSG00000031565	FGFR1	2.193	0.000784144
ENSMUSG00000031570	PLPP5	1.008	0.00251557
ENSMUSG00000031613	HPGD	-2.587	3.38075e-08
ENSMUSG00000031618	NR3C2	-1.73	0.000466814
ENSMUSG00000031626	SORBS2	-2.993	0.0021564
ENSMUSG00000031654	CBLN1	-3.185	0.0297013
ENSMUSG00000031712	IL15	-1.451	0.0271366
ENSMUSG00000031775	PLLP	-3.134	0.0146479
ENSMUSG00000031779	CCL22	-2.603	0.0475638
ENSMUSG00000031802	PHXR4	-1.229	0.0168344
ENSMUSG00000031803	B3GNT3	-1.081	0.0309092
ENSMUSG00000031842	PDE4C	-1.58	0.00413016
ENSMUSG00000031844	HSD17B2	-2.489	0.0474663
ENSMUSG00000031875	CMTM3	1.035	0.00336129
ENSMUSG00000031893	TSNAXIP1	-1.591	0.0366719
ENSMUSG00000031904	SLC7A6	1.057	0.00486926
ENSMUSG00000031906	SMPD3	-1.286	0.0122378
ENSMUSG00000031948	KARS	1.212	8.06578e-05
ENSMUSG00000031951	TMEM231	1.094	0.015691
ENSMUSG00000031974	ABCB10	1.191	0.0394989
ENSMUSG00000031990	JAM3	-2.916	0.0137893
ENSMUSG00000031995	ST14	-1.652	0.0049779
ENSMUSG00000031996	APLP2	1.302	0.000931005
ENSMUSG00000032006	PDGFD	-3.77	0.0237322
ENSMUSG00000032009	SESN3	-1.26	3.17675e-05
ENSMUSG00000032012	NECTIN1	1.03	0.0257951
ENSMUSG00000032013	TRIM29	-4.186	0.00160139
ENSMUSG00000032014	OAF	2.48	6.13247e-05
ENSMUSG00000032021	CRTAM	-1.154	0.0189434
ENSMUSG00000032028	NXPE2	-2.425	0.00741496
ENSMUSG00000032033	BARX2	-3.318	0.0448367
ENSMUSG00000032051	FDX1	1.299	0.000564075
ENSMUSG00000032060	CRYAB	-2.497	0.0176787
ENSMUSG00000032068	PLET1	-3.162	0.0165095
ENSMUSG00000032091	TMPRSS4	-3.168	0.0170453
ENSMUSG00000032092	MPZL2	-3.874	0.0145189
ENSMUSG00000032094	CD3D	-1.053	0.013835
ENSMUSG00000032122	SLC37A2	-1.39	0.000848265
ENSMUSG00000032186	TMOD2	-1.927	0.0187446
ENSMUSG00000032193	LDLR	1.091	0.0158324
ENSMUSG00000032198	DOCK6	-1.316	0.000465552
ENSMUSG00000032220	MYO1E	-1.048	0.00231239
ENSMUSG00000032221	MNS1	1.471	0.00568337
ENSMUSG00000032232	CGNL1	-2.724	0.0193971
ENSMUSG00000032257	ANKK1	-2.931	0.0215826
ENSMUSG00000032258	LCA5	-1.483	0.00280226
ENSMUSG00000032265	TENT5A	1.326	0.000134274
ENSMUSG00000032281	ACSBG1	2.388	0.0151641
ENSMUSG00000032290	PTPN9	1.719	1.7549e-10
ENSMUSG00000032322	PSTPIP1	-1.173	0.00100462
ENSMUSG00000032348	GSTA4	-3.554	0.00859831
ENSMUSG00000032360	HCRTR2	-1.676	0.00186212
ENSMUSG00000032411	TFDP2	-2.734	0.0481797
ENSMUSG00000032420	NT5E	-1.881	0.0446574
ENSMUSG00000032454	RBP2	-4.653	0.00672354
ENSMUSG00000032491	NRADD	-1.223	0.000683368
ENSMUSG00000032496	LTF	-3.037	0.0416797
ENSMUSG00000032528	VIPR1	-1.424	0.00683579
ENSMUSG00000032531	AMOTL2	-2.347	0.00922975
ENSMUSG00000032548	SLCO2A1	-3.037	0.0182889
ENSMUSG00000032561	ACPP	-2.021	0.00201979
ENSMUSG00000032577	MAPKAPK3	1.039	0.000276081
ENSMUSG00000032578	CISH	1.563	0.0105312
ENSMUSG00000032589	BSN	1.149	0.029714
ENSMUSG00000032607	AMT	-1.072	0.0196173
ENSMUSG00000032609	KLHDC8B	1.386	0.01781
ENSMUSG00000032691	NLRP3	-1.714	0.0443547
ENSMUSG00000032702	KANK1	-3.695	0.0141297
ENSMUSG00000032724	ABTB2	-1.243	0.00534438
ENSMUSG00000032725	FOLR2	-3.549	0.0103937
ENSMUSG00000032750	GAB3	-1.097	1.73124e-07
ENSMUSG00000032776	MCTP2	-1.327	0.000503678
ENSMUSG00000032818	LOXHD1	-2.369	0.0200769
ENSMUSG00000032841	PRR5L	-1.31	0.0281722
ENSMUSG00000032845	ALPK2	-1.559	0.000331233
ENSMUSG00000032850	RNFT2	-1.397	0.0291684
ENSMUSG00000032860	P2RY2	-2.725	0.00404356
ENSMUSG00000032875	ARHGEF17	-2.153	0.0490965
ENSMUSG00000033022	CDO1	-2.61	0.0102838
ENSMUSG00000033060	LMO7	-2.956	0.0140193
ENSMUSG00000033066	GAS7	1.509	0.0102041
ENSMUSG00000033170	CARD10	-1.951	0.00022019
ENSMUSG00000033207	MAMDC2	2.559	0.0142899
ENSMUSG00000033209	TTC28	-1.26	0.0472678
ENSMUSG00000033213	AA467197	-2.841	0.0250492
ENSMUSG00000033255	GM5134	-1.161	0.0209649
ENSMUSG00000033256	SHF	1.068	0.000461233
ENSMUSG00000033306	LPP	-1.037	0.00914058
ENSMUSG00000033386	FRRS1	1.146	0.000181068
ENSMUSG00000033427	UPB1	-1.071	0.0349109
ENSMUSG00000033508	ASPRV1	-2.806	0.012684
ENSMUSG00000033533	ACSM1	-4.608	0.0128196
ENSMUSG00000033542	ARHGEF5	-2.136	0.0279359
ENSMUSG00000033720	SFXN5	-1.31	0.0477788
ENSMUSG00000033730	EGR3	-1.133	0.00907169
ENSMUSG00000033768	NRXN2	-1.704	0.0401257
ENSMUSG00000033863	KLF9	1.733	2.95198e-09
ENSMUSG00000033965	SLC16A2	-2.521	0.0276401
ENSMUSG00000034007	SCAPER	-1.221	9.56966e-07
ENSMUSG00000034101	CTNND1	1.264	0.0273334
ENSMUSG00000034109	GOLIM4	1.386	1.22953e-07
ENSMUSG00000034121	MKS1	-1.24	7.40638e-05
ENSMUSG00000034159	2310007B03RIK	-3.007	0.0180352
ENSMUSG00000034171	FAAH	-1.476	1.60837e-05
ENSMUSG00000034271	JDP2	-2.056	0.0389935
ENSMUSG00000034282	EVPL	-4.529	0.00102656
ENSMUSG00000034362	CSTA1	-2.881	0.0330415
ENSMUSG00000034382	AI661453	-3.063	0.0155958
ENSMUSG00000034435	TMEM30B	-3.444	0.0125533
ENSMUSG00000034438	GBP8	-1.358	0.00077007
ENSMUSG00000034462	PKD2	1.457	0.0131256
ENSMUSG00000034485	UACA	-3.182	0.0079357
ENSMUSG00000034557	ZFYVE9	-1.008	0.0288453
ENSMUSG00000034584	EXPH5	-3.111	0.00781035
ENSMUSG00000034586	HID1	-1.081	0.0137893
ENSMUSG00000034591	SLC41A2	-1.014	0.00600935
ENSMUSG00000034607	POF1B	-3.252	0.0140315
ENSMUSG00000034634	LY6D	-1.096	0.0142738
ENSMUSG00000034663	BMP2K	1.094	0.00721267
ENSMUSG00000034684	SEMA3F	-2.728	0.0382497
ENSMUSG00000034707	GNS	1.09	0.00257778
ENSMUSG00000034714	TTYH2	1.349	0.000449026
ENSMUSG00000034731	DGKH	-1.496	2.74861e-05
ENSMUSG00000034744	NAGK	1.051	0.00022019
ENSMUSG00000034751	MAST4	1.082	4.18342e-06
ENSMUSG00000034765	DUSP5	-1.652	0.0209961
ENSMUSG00000034796	CPNE7	1.355	0.0294217
ENSMUSG00000034825	NRIP3	2.379	0.0435977
ENSMUSG00000034855	CXCL10	-1.727	0.0150806
ENSMUSG00000034858	FAM214A	-1.222	0.000112103
ENSMUSG00000034867	ANKRD27	1.073	2.41838e-06
ENSMUSG00000034881	TBXA2R	-1.089	0.00618992
ENSMUSG00000034903	COBLL1	-1.164	0.000107787
ENSMUSG00000034919	TTC22	-3.192	0.0185355
ENSMUSG00000034949	ZFR2	-1.139	0.0067853
ENSMUSG00000034959	RUBCNL	-1.051	0.00374922
ENSMUSG00000034993	VAT1	1.406	0.00093209
ENSMUSG00000035064	EEF2K	1.132	0.000130261
ENSMUSG00000035126	WDR78	-1.025	0.0457643
ENSMUSG00000035158	MITF	2.153	0.000230241
ENSMUSG00000035168	TANC1	-1.349	0.000435667
ENSMUSG00000035239	NEU3	1.11	0.000174179
ENSMUSG00000035270	IMPG2	-1.252	0.000347094
ENSMUSG00000035275	RAVER2	-1.502	0.00280226
ENSMUSG00000035284	VPS13C	1.212	0.000227079
ENSMUSG00000035314	GDPD5	-1.826	0.00910778
ENSMUSG00000035356	NFKBIZ	-1.354	0.017234
ENSMUSG00000035429	PTPRH	-2.904	0.020787
ENSMUSG00000035498	CDCP1	-2.937	0.019811
ENSMUSG00000035547	CAPN5	-2.194	0.0167683
ENSMUSG00000035638	MUC20	-3.004	0.0215321
ENSMUSG00000035711	DOK3	-1.007	0.00368196
ENSMUSG00000035818	PLEKHS1	-2.877	0.0205805
ENSMUSG00000035849	KRT222	-1.27	0.0166368
ENSMUSG00000035852	MISP	-1.91	0.0487744
ENSMUSG00000035861	TMPRSS11B	-3.43	0.0198306
ENSMUSG00000035878	HYKK	-1.061	0.047665
ENSMUSG00000035891	CERK	-1.06	0.0215321
ENSMUSG00000035914	CD276	1.233	0.0385325
ENSMUSG00000035929	H2-Q4	-1.008	0.000412588
ENSMUSG00000035992	FNIP1	1.033	0.00077007
ENSMUSG00000036027	1810046K07RIK	-1.536	0.0414232
ENSMUSG00000036106	PRR5	-1.139	0.00585374
ENSMUSG00000036109	MBNL3	1.131	7.89355e-06
ENSMUSG00000036155	MGAT5	1.442	1.64391e-07
ENSMUSG00000036172	CD200R3	1.868	0.0120541
ENSMUSG00000036185	SAPCD1	2.257	0.0011684
ENSMUSG00000036249	RBM43	1.103	8.87598e-06
ENSMUSG00000036273	LRRK2	-1.331	0.00111521
ENSMUSG00000036306	LZTS1	-1.233	0.0306058
ENSMUSG00000036381	P2RY14	2.142	0.000530532
ENSMUSG00000036459	WTIP	2.797	0.04359
ENSMUSG00000036469	2019-03-01	-1.13	0.00200287
ENSMUSG00000036473	TBC1D24	1.478	0.00791108
ENSMUSG00000036492	RNF39	-3.526	0.00331052
ENSMUSG00000036526	CARD11	-1.083	0.00791108
ENSMUSG00000036533	CDC42EP3	1.167	0.000118464
ENSMUSG00000036617	ETL4	-3.006	0.0111685
ENSMUSG00000036620	MGAT4B	1.427	0.0030217
ENSMUSG00000036661	DENND3	-1.391	0.000221168
ENSMUSG00000036731	CYSRT1	-2.55	0.0409452
ENSMUSG00000036853	MCOLN3	-1.331	0.0164278
ENSMUSG00000036856	WNT4	-4.251	0.00160698
ENSMUSG00000036863	SYDE2	1.788	0.0013417
ENSMUSG00000036931	NFKBID	-1.341	0.00404356
ENSMUSG00000037014	SSTR4	-1.507	0.00363476
ENSMUSG00000037033	CLCA3B	-2.997	0.0352231
ENSMUSG00000037071	SCD1	-1.162	0.0108338
ENSMUSG00000037104	SOCS5	-1.004	0.000740232
ENSMUSG00000037129	TMPRSS13	-1.923	0.00304642
ENSMUSG00000037151	LRRC20	1.075	0.000442953
ENSMUSG00000037185	KRT80	-1.468	0.0141395
ENSMUSG00000037188	GRHL3	-4.039	0.00210237
ENSMUSG00000037224	ZFYVE28	-1.101	0.0205009
ENSMUSG00000037225	FGF2	2.808	0.0209661
ENSMUSG00000037318	TRAF3IP3	-1.501	5.86134e-06
ENSMUSG00000037341	SLC9A7	-1.174	0.000612562
ENSMUSG00000037346	HRH4	2.427	0.000698318
ENSMUSG00000037375	HHAT	-1.004	0.00360659
ENSMUSG00000037411	SERPINE1	4.262	0.00382118
ENSMUSG00000037440	VNN1	-2.733	0.0387889
ENSMUSG00000037463	FBXO27	-1.474	0.0176946
ENSMUSG00000037606	OSBPL5	-1.179	0.000177481
ENSMUSG00000037613	TNFRSF23	-1.743	0.0276472
ENSMUSG00000037636	SLC25A43	1.251	0.00175227
ENSMUSG00000037664	CDKN1C	-1.138	0.0453206
ENSMUSG00000037754	PPP1R16B	-1.248	4.51598e-05
ENSMUSG00000037849	IFI206	-1.078	0.0424442
ENSMUSG00000037905	BRI3BP	1.191	5.90782e-06
ENSMUSG00000037922	BANK1	-1.4	0.000392482
ENSMUSG00000037944	CCR7	-1.047	0.0291455
ENSMUSG00000037972	SNN	-1.105	0.00180657
ENSMUSG00000037995	IGSF9	-1.151	0.00323652
ENSMUSG00000038037	SOCS1	1.077	0.00314982
ENSMUSG00000038065	MTURN	-1.326	2.63982e-06
ENSMUSG00000038072	GALNT11	-1.083	0.00149229
ENSMUSG00000038094	ATP13A4	-3.778	0.00704397
ENSMUSG00000038119	CDON	-1.2	0.00320894
ENSMUSG00000038128	CAMK4	-1.134	0.020322
ENSMUSG00000038145	SNRK	-1.134	8.07189e-05
ENSMUSG00000038151	PRDM1	-1.976	0.00932405
ENSMUSG00000038167	PLEKHG6	-3.232	0.0065174
ENSMUSG00000038244	MICAL2	-1.366	0.0212417
ENSMUSG00000038264	SEMA7A	-1.393	0.00117834
ENSMUSG00000038296	GALNT18	-3.617	0.00476134
ENSMUSG00000038319	KCNH2	-1.387	0.01781
ENSMUSG00000038349	PLCL1	1.08	0.00714378
ENSMUSG00000038352	ARL5C	-1.043	0.00761806
ENSMUSG00000038375	TRP53INP2	-2.485	0.0207684
ENSMUSG00000038421	FCRLA	-1.152	0.0160006
ENSMUSG00000038437	MLLT6	-1.087	0.00086858
ENSMUSG00000038453	SRCIN1	-2.277	0.0450082
ENSMUSG00000038502	PTOV1	1.087	0.00328268
ENSMUSG00000038517	TBKBP1	-1.195	0.0127566
ENSMUSG00000038540	TMC3	-1.31	0.0155618
ENSMUSG00000038545	CUL7	1.12	2.58157e-05
ENSMUSG00000038604	RIPOR1	1.084	0.0050282
ENSMUSG00000038663	FSD2	-1.434	0.00247339
ENSMUSG00000038670	MYBPC2	-1.213	0.0318223
ENSMUSG00000038679	TRPS1	-1.076	0.0138824
ENSMUSG00000038732	MBOAT1	-1.574	0.0107292
ENSMUSG00000038738	SHANK1	-1.168	0.00552577
ENSMUSG00000038751	PTK6	-2.229	0.000433266
ENSMUSG00000038776	EPHX1	-1.032	0.0228839
ENSMUSG00000038781	STAP2	-2.826	0.0219534
ENSMUSG00000038831	RALGPS1	-1.091	0.000668051
ENSMUSG00000038843	GCNT1	1.095	0.0142355
ENSMUSG00000038859	BAIAP2L1	-2.499	0.0421896
ENSMUSG00000038872	ZFHX3	1.77	0.00169678
ENSMUSG00000038879	NIPAL2	-3.755	0.0202477
ENSMUSG00000038936	SCCPDH	1.933	1.77894e-05
ENSMUSG00000038963	SLCO4A1	-1.073	0.0393176
ENSMUSG00000038973	CLDND2	-1.04	0.0290453
ENSMUSG00000038982	BLOC1S5	1.109	0.000466814
ENSMUSG00000039013	SIGLECF	2.294	0.00722979
ENSMUSG00000039063	ECHDC3	-2.237	0.00892902
ENSMUSG00000039089	L3MBTL3	-1.134	2.60094e-06
ENSMUSG00000039137	WHRN	-1.78	6.91675e-06
ENSMUSG00000039158	AKNA	-1.15	0.00209203
ENSMUSG00000039166	AKAP7	-2.406	0.0343586
ENSMUSG00000039178	TBC1D19	1.083	0.0324083
ENSMUSG00000039193	NLRC4	-1.112	0.00077007
ENSMUSG00000039197	ADK	1.076	0.0127394
ENSMUSG00000039238	ZFP750	-3.986	0.00314982
ENSMUSG00000039254	POMT1	1.011	0.00622625
ENSMUSG00000039264	GIMAP3	-1.114	0.00157868
ENSMUSG00000039270	MEGF9	-1.029	0.0240364
ENSMUSG00000039308	NDST2	1.457	9.07686e-05
ENSMUSG00000039328	RNF122	-1.133	0.00371124
ENSMUSG00000039395	MREG	-2.123	0.0268201
ENSMUSG00000039405	PRSS23	-2.664	0.0253423
ENSMUSG00000039457	PPL	-3.506	0.00398543
ENSMUSG00000039474	WFS1	-2.284	0.00280528
ENSMUSG00000039529	ATP8B1	-2.753	0.0298129
ENSMUSG00000039646	VASN	-2.854	0.00934772
ENSMUSG00000039701	USP53	-1.733	2.08052e-08
ENSMUSG00000039715	WDR34	1.042	0.0088919
ENSMUSG00000039741	BAHCC1	1.022	0.0246115
ENSMUSG00000039774	GALNT12	-1.271	1.32947e-05
ENSMUSG00000039831	ARHGAP29	-1.269	0.0215196
ENSMUSG00000039835	NHSL1	-2.122	0.0107292
ENSMUSG00000039908	SLC26A11	-1.44	5.86388e-06
ENSMUSG00000039910	CITED2	1.505	0.000761988
ENSMUSG00000039934	GSAP	-1.222	0.000408018
ENSMUSG00000039982	DTX4	1.561	0.020021
ENSMUSG00000039997	IFI203	-1.454	0.00024457
ENSMUSG00000040127	SDR9C7	-5.188	0.0128023
ENSMUSG00000040147	MAOB	3.035	0.0257428
ENSMUSG00000040165	CD209C	-1.849	0.0312348
ENSMUSG00000040209	ZFP704	1.536	0.00805854
ENSMUSG00000040220	GAS8	1.02	0.000817154
ENSMUSG00000040268	PLEKHA1	-1.014	0.000617317
ENSMUSG00000040274	CDK6	1.306	0.00434625
ENSMUSG00000040314	CTSG	3.465	0.00957038
ENSMUSG00000040415	DTX3	1.227	9.46198e-05
ENSMUSG00000040447	SPNS2	-2.693	0.00064987
ENSMUSG00000040511	PVR	-1.036	0.00480611
ENSMUSG00000040525	CBLC	-3.082	0.0181275
ENSMUSG00000040570	RUNDC3B	-1.005	0.0157988
ENSMUSG00000040605	BACE2	-3.043	0.018562
ENSMUSG00000040606	KAZN	-3.421	0.00491331
ENSMUSG00000040649	RIMKLB	-2.612	0.0417018
ENSMUSG00000040663	CLCF1	-1.664	1.15694e-05
ENSMUSG00000040703	CYP2S1	-1.209	0.020322
ENSMUSG00000040724	KCNA2	-1.729	0.00100462
ENSMUSG00000040728	ESRP1	-4.481	0.00404829
ENSMUSG00000040729	CEP126	-2.963	0.0288277
ENSMUSG00000040732	ERG	2.001	0.00956106
ENSMUSG00000040749	SIAH1B	1.035	0.00978824
ENSMUSG00000040811	EML2	1.111	8.35657e-05
ENSMUSG00000040857	ERF	1.106	0.00374922
ENSMUSG00000040867	BEGAIN	-1.209	0.0477429
ENSMUSG00000040875	OSBPL10	-2.829	0.0443032
ENSMUSG00000040938	SLC16A11	-3.404	0.0101051
ENSMUSG00000040957	CABLES1	1.817	0.0073369
ENSMUSG00000041073	NACAD	-1.346	0.00805752
ENSMUSG00000041075	FZD7	1.208	0.0149196
ENSMUSG00000041235	CHD7	-1.279	7.18521e-06
ENSMUSG00000041238	RBBP8	1.006	1.60351e-05
ENSMUSG00000041247	LAMP3	-1.573	0.00819602
ENSMUSG00000041248	KCNJ1	-1.702	0.00609599
ENSMUSG00000041272	TOX	-1.059	0.0215321
ENSMUSG00000041293	ADGRF1	-2.907	0.0193694
ENSMUSG00000041298	KATNAL1	1.061	0.0011321
ENSMUSG00000041361	MYZAP	-2.351	9.05238e-06
ENSMUSG00000041420	MEIS3	-1.112	0.00122154
ENSMUSG00000041444	ARHGAP32	-2.344	0.0292117
ENSMUSG00000041460	CACNA2D4	-1.171	0.0145189
ENSMUSG00000041481	SERPINA3G	1.508	0.00335808
ENSMUSG00000041488	STX3	1.417	0.0204681
ENSMUSG00000041528	RNF123	-1.285	0.0298298
ENSMUSG00000041538	H2-OB	-1.117	0.0127519
ENSMUSG00000041609	BICDL1	-1.317	0.000802606
ENSMUSG00000041658	RRAGB	-1.067	0.00243471
ENSMUSG00000041688	AMOT	-1.403	0.0297013
ENSMUSG00000041695	KCNJ2	-1.622	0.027933
ENSMUSG00000041696	RASL12	-1.663	0.0228321
ENSMUSG00000041707	TMEM273	2.085	0.0368321
ENSMUSG00000041757	PLEKHA6	-2.358	0.00644281
ENSMUSG00000041845	RHOD	-3.53	0.00384376
ENSMUSG00000041849	CARD6	-1.15	0.00392389
ENSMUSG00000041886	MACC1	-4.578	0.00473546
ENSMUSG00000041939	MVK	1.153	0.000522096
ENSMUSG00000041961	ZNRF3	-1.216	0.00764812
ENSMUSG00000041992	RAPGEF5	-1.051	0.004171
ENSMUSG00000042042	CSGALNACT2	1.337	1.22881e-05
ENSMUSG00000042046	DSTYK	1.158	4.93564e-05
ENSMUSG00000042050	WDR60	1.458	0.00262108
ENSMUSG00000042105	INPP5F	-1.041	2.33001e-05
ENSMUSG00000042155	KLHL23	1.44	0.0432316
ENSMUSG00000042250	PGLYRP4	-2.902	0.0275626
ENSMUSG00000042289	HSD3B7	1.242	0.00956106
ENSMUSG00000042302	EHBP1	-1.528	0.00994589
ENSMUSG00000042306	S100A14	-3.062	0.0224495
ENSMUSG00000042345	UBASH3A	-1.195	0.00452452
ENSMUSG00000042349	IKBKE	-1.059	0.00853935
ENSMUSG00000042428	MGAT3	-4.011	0.0036301
ENSMUSG00000042474	FCMR	-1.068	0.041334
ENSMUSG00000042514	KLHL14	-1.25	0.00791108
ENSMUSG00000042659	ARRDC4	-1.63	0.00814519
ENSMUSG00000042684	NPL	1.718	0.0438386
ENSMUSG00000042724	MAP3K9	-1.544	1.54105e-06
ENSMUSG00000042734	TTC9	-3.036	0.0251762
ENSMUSG00000042751	NMNAT2	1.733	0.00676307
ENSMUSG00000042757	TMEM108	-1.097	0.0118387
ENSMUSG00000042784	MUC1	-3.099	0.0125533
ENSMUSG00000042842	SERPINB6B	1.365	0.00793835
ENSMUSG00000042845	WFDC12	6.468	0.0349677
ENSMUSG00000043051	DISC1	1.643	0.000886877
ENSMUSG00000043099	HIC1	1.48	0.0131445
ENSMUSG00000043102	QRFP	-1.108	0.0150806
ENSMUSG00000043168	4930426D05RIK	-1.413	0.00465678
ENSMUSG00000043243	FAM129C	-1.157	0.0167988
ENSMUSG00000043252	TMEM64	1.471	6.52605e-09
ENSMUSG00000043263	IFI209	-1.011	0.00534438
ENSMUSG00000043333	RHBDL2	-3.034	0.0318223
ENSMUSG00000043336	FILIP1L	-1.003	0.01781
ENSMUSG00000043487	ACOT6	1.181	0.0259522
ENSMUSG00000043505	GIMAP5	-1.266	3.35999e-07
ENSMUSG00000043705	CAPN13	-3.541	0.0177272
ENSMUSG00000043727	F830045P16RIK	2.157	0.0326804
ENSMUSG00000043753	DMRTA1	-1.178	0.0420521
ENSMUSG00000043773	1700048O20RIK	-1.556	0.00792672
ENSMUSG00000043782	BICDL2	-3.095	0.0127725
ENSMUSG00000043833	2900005J15RIK	-1.966	0.000757269
ENSMUSG00000043895	S1PR2	1.497	0.00131471
ENSMUSG00000043940	WDFY3	1.193	0.0265752
ENSMUSG00000044021	MUC19	-3.095	3.96123e-05
ENSMUSG00000044037	ALS2CL	-1.611	0.00105158
ENSMUSG00000044041	KRT13	-3.597	0.00494955
ENSMUSG00000044081	ZFP85OS	-1.204	0.0455179
ENSMUSG00000044103	IL1F9	-2.092	0.0151641
ENSMUSG00000044156	HEPACAM2	-1.514	0.00350257
ENSMUSG00000044167	FOXO1	-1.077	0.00248461
ENSMUSG00000044217	AQP5	-3.536	0.0141297
ENSMUSG00000044279	CRB3	-1.894	0.00416143
ENSMUSG00000044453	FFAR1	-1.563	0.00138003
ENSMUSG00000044471	LNCPINT	-1.853	3.33584e-07
ENSMUSG00000044505	LINGO4	-2.061	0.0107292
ENSMUSG00000044534	ACKR2	-1.192	0.0157139
ENSMUSG00000044594	SERPINB3A	-6.753	0.0107358
ENSMUSG00000044626	LIPH	-3.055	0.0164145
ENSMUSG00000044629	CNRIP1	-1.28	0.00160698
ENSMUSG00000044674	FZD1	-2.461	0.0191429
ENSMUSG00000044694	2010007H06RIK	-1.249	0.0100586
ENSMUSG00000044701	IL27	-1.796	0.00140548
ENSMUSG00000044734	SERPINB1A	2.637	5.24203e-09
ENSMUSG00000044748	DEFB1	-3.273	0.0141297
ENSMUSG00000044749	ABCA6	-1.361	0.0162058
ENSMUSG00000044770	SCML4	-1.395	0.000432718
ENSMUSG00000044807	ZFP354C	-1.117	0.0116812
ENSMUSG00000044827	TLR1	-1.205	0.00164396
ENSMUSG00000044864	ANKRD50	-1.074	0.00162692
ENSMUSG00000044867	GIMAP1OS	-1.099	0.000940207
ENSMUSG00000044912	SYT16	-4.349	0.0101294
ENSMUSG00000045027	PRSS22	-3.11	0.0174776
ENSMUSG00000045031	CETN4	1.786	0.0168531
ENSMUSG00000045180	SHROOM2	-3.094	0.0189032
ENSMUSG00000045216	HS6ST1	1.029	0.00678971
ENSMUSG00000045231	BC106179	-1.475	0.000421016
ENSMUSG00000045314	SOWAHB	-3.836	0.00452327
ENSMUSG00000045441	GPRIN3	-1.377	0.00022019
ENSMUSG00000045467	TTLL13	1.159	0.0310949
ENSMUSG00000045545	KRT14	-4.872	0.00795712
ENSMUSG00000045594	GLB1	1.207	0.0103937
ENSMUSG00000045629	SH3TC2	-3.096	0.0454029
ENSMUSG00000045659	PLEKHA7	-2.337	0.00466022
ENSMUSG00000045672	COL27A1	-1.858	3.67227e-05
ENSMUSG00000045730	ADRB2	-1.145	0.00284956
ENSMUSG00000045868	GVIN1	-1.094	0.00766372
ENSMUSG00000045928	4933440M02RIK	-2.07	0.00932405
ENSMUSG00000045980	TMEM104	1.42	0.00152592
ENSMUSG00000046058	EID2	1.743	0.00872968
ENSMUSG00000046169	ADAMTS6	-1.507	2.06134e-05
ENSMUSG00000046182	GSG1L	2.6	0.0388491
ENSMUSG00000046352	GJB2	-1.985	0.0193971
ENSMUSG00000046354	DEFB14	-3.332	0.0426057
ENSMUSG00000046652	TAS2R143	-2.333	0.0137638
ENSMUSG00000046694	TENT5B	-3.317	0.00833451
ENSMUSG00000046727	CYSTM1	-2.219	0.0367077
ENSMUSG00000046733	GPRC5A	-2.477	0.0447452
ENSMUSG00000046761	FAM83H	-2.636	0.0059991
ENSMUSG00000046982	TSHZ1	1.088	0.000331963
ENSMUSG00000047104	PBP2	-2.979	0.0261742
ENSMUSG00000047115	FAM221A	1.512	0.027374
ENSMUSG00000047117	ANKDD1B	-3.146	0.0118571
ENSMUSG00000047139	CD24A	-2.511	0.0421489
ENSMUSG00000047161	CHST9	-4.753	0.0440215
ENSMUSG00000047205	DUSP18	1.444	0.0113239
ENSMUSG00000047264	ZFP358	1.31	0.00155607
ENSMUSG00000047293	GPR15	-1.421	0.0029845
ENSMUSG00000047342	ZFP286	-1.694	0.00084008
ENSMUSG00000047361	GM973	2.528	0.00082956
ENSMUSG00000047371	ZFP768	1.047	0.00173948
ENSMUSG00000047407	TGIF1	-1.053	0.0376198
ENSMUSG00000047415	GPR68	-1.126	0.00751907
ENSMUSG00000047419	CMYA5	-1.109	0.0113655
ENSMUSG00000047496	RNF152	-3.457	0.0052377
ENSMUSG00000047501	CLDN4	-4.146	0.00638897
ENSMUSG00000047515	BC049715	-1.504	0.000554943
ENSMUSG00000047557	LXN	1.81	0.0102845
ENSMUSG00000047586	NCCRP1	-3.384	0.0116751
ENSMUSG00000047604	FRAT2	1.003	0.00160139
ENSMUSG00000047712	UST	-1.092	0.00267964
ENSMUSG00000047730	FCGBP	-2.923	0.0457057
ENSMUSG00000047793	SNED1	-2.667	0.000139596
ENSMUSG00000047819	TIGD4	-2.549	0.0327485
ENSMUSG00000047842	DIRAS2	-1.56	0.0293078
ENSMUSG00000047867	GIMAP6	-1.074	0.00328268
ENSMUSG00000047884	KLK9	-3.877	0.0178584
ENSMUSG00000047907	TSHZ2	-2.863	0.0445569
ENSMUSG00000047959	KCNA3	-1.546	0.0137859
ENSMUSG00000047963	STBD1	-1.456	0.0330954
ENSMUSG00000047996	PRRG1	-1.201	0.00999853
ENSMUSG00000048027	RGMB	-1.321	2.14882e-05
ENSMUSG00000048031	FCRL5	-1.117	0.0241714
ENSMUSG00000048078	TENM4	1.049	0.0394083
ENSMUSG00000048120	ENTPD1	-1.306	0.0457057
ENSMUSG00000048215	A630023P12RIK	-1.835	0.000761343
ENSMUSG00000048218	AMIGO2	1.074	0.0168124
ENSMUSG00000048232	FBXO10	-1.092	0.0106239
ENSMUSG00000048251	BCL11B	-1.121	0.0261158
ENSMUSG00000048284	TAS2R126	-3.033	0.00200287
ENSMUSG00000048285	FRMD6	1.108	0.000644004
ENSMUSG00000048376	F2R	1.627	0.0384662
ENSMUSG00000048399	TPRG	-4.177	0.00661691
ENSMUSG00000048442	SMIM5	1.322	0.0113255
ENSMUSG00000048490	NRIP1	1.327	5.53752e-07
ENSMUSG00000048498	CD300E	-1.156	0.0253423
ENSMUSG00000048503	TMEM136	1.406	0.0470667
ENSMUSG00000048521	CXCR6	-1.031	0.0244461
ENSMUSG00000048534	JAML	-1.472	0.00756143
ENSMUSG00000048537	PHLDB1	1.296	0.0141758
ENSMUSG00000048621	GM6377	-1.043	0.0241443
ENSMUSG00000048652	SAMD13	1.586	0.0142667
ENSMUSG00000048699	KRT90	-3.304	0.0225415
ENSMUSG00000048764	TMPRSS11F	-2.881	0.0340789
ENSMUSG00000048807	SLC35E4	1.069	0.0460165
ENSMUSG00000048824	GM568	-1.539	0.00997415
ENSMUSG00000048852	GM12185	-1.156	0.0194468
ENSMUSG00000048865	ARHGAP30	-1.357	0.00280114
ENSMUSG00000048905	4930539E08RIK	-1.434	0.0135149
ENSMUSG00000048924	CCDC125	-1.125	0.0002163
ENSMUSG00000048965	MRGPRE	-1.103	0.0137893
ENSMUSG00000048992	PRSS32	-2.898	0.0306339
ENSMUSG00000049044	RAPGEF4	-1.473	0.000612476
ENSMUSG00000049086	BMYC	-1.077	0.00413618
ENSMUSG00000049092	GPR137C	-2.475	4.80728e-08
ENSMUSG00000049109	THEMIS	-1.201	0.00633481
ENSMUSG00000049313	SORL1	-1.263	0.0125579
ENSMUSG00000049314	FBXW13	-1.312	0.0387252
ENSMUSG00000049422	CHCHD10	-1.313	0.00160698
ENSMUSG00000049436	UPK1B	-2.914	0.0143765
ENSMUSG00000049515	ESPNL	2.08	0.0312853
ENSMUSG00000049555	TMIE	-1.428	0.0108387
ENSMUSG00000049653	SPATC1	-2.249	0.0361282
ENSMUSG00000049687	PHETA2	1.278	0.0337473
ENSMUSG00000049848	CEACAM19	-1.55	0.0223274
ENSMUSG00000049858	SUOX	1.149	0.000239146
ENSMUSG00000049971	GLT1D1	-1.869	0.00107934
ENSMUSG00000050122	VWA3B	-1.128	0.0312348
ENSMUSG00000050132	SARM1	-1.165	0.00943315
ENSMUSG00000050195	SCD4	1.118	0.0189189
ENSMUSG00000050240	HIC2	1.305	0.00146189
ENSMUSG00000050295	FOXC1	-3.631	0.0104393
ENSMUSG00000050345	4930486L24RIK	-2.694	0.0375856
ENSMUSG00000050357	CARMIL2	-1.121	0.000767664
ENSMUSG00000050359	SPRR1A	-4.35	0.0228754
ENSMUSG00000050382	KIF7	1.252	0.0236575
ENSMUSG00000050463	KRT78	-4.046	0.00311133
ENSMUSG00000050635	SPRR2F	-4.393	0.0476667
ENSMUSG00000050762	PRSS27	-3.235	0.0128134
ENSMUSG00000050777	TMEM37	1.465	0.0291821
ENSMUSG00000050854	TMEM125	-3.388	0.0109441
ENSMUSG00000050860	PHOSPHO1	-2.927	0.0248395
ENSMUSG00000050931	SGMS2	-1.631	0.0377485
ENSMUSG00000050944	EFCAB5	-1.702	0.0313655
ENSMUSG00000051000	FAM160A1	-2.206	0.0304506
ENSMUSG00000051022	HS3ST1	-1.076	0.0208905
ENSMUSG00000051034	ZFP11	1.036	0.0151205
ENSMUSG00000051107	NA	-1.13	0.00560319
ENSMUSG00000051124	GIMAP9	-1.107	0.001124
ENSMUSG00000051166	EML5	-1.595	6.40235e-07
ENSMUSG00000051177	PLCB1	1.712	0.00844951
ENSMUSG00000051236	MSRB3	3.325	0.00381904
ENSMUSG00000051344	PLEKHM3	-1.014	0.000347021
ENSMUSG00000051354	SAMD3	-1.242	0.00109686
ENSMUSG00000051359	NCALD	-1.189	0.0239348
ENSMUSG00000051375	PCDH1	-2.924	0.0157076
ENSMUSG00000051444	BBS12	1.286	0.000122208
ENSMUSG00000051457	SPN	1.3	0.00110325
ENSMUSG00000051537	GM5124	-1.226	0.0261058
ENSMUSG00000051590	MAP3K19	-1.319	0.0050282
ENSMUSG00000051804	ADAM6B	-1.305	0.0340432
ENSMUSG00000051817	SOX12	1.056	0.00858325
ENSMUSG00000051950	B3GLCT	1.415	1.12237e-05
ENSMUSG00000051998	LAX1	-1.27	0.000275708
ENSMUSG00000052013	BTLA	-1.201	0.00859439
ENSMUSG00000052131	AKR1B7	-2.821	0.0318087
ENSMUSG00000052302	TBC1D30	1.231	0.0173186
ENSMUSG00000052374	ACTN2	-1.531	0.00353337
ENSMUSG00000052477	C130026I21RIK	-1.228	0.000110671
ENSMUSG00000052485	TMEM171	-2.651	0.0491548
ENSMUSG00000052512	NAV2	1.431	0.00136631
ENSMUSG00000052534	PBX1	1.601	0.0026614
ENSMUSG00000052539	MAGI3	-2.061	0.00135452
ENSMUSG00000052563	D930048N14RIK	-2.324	5.63948e-07
ENSMUSG00000052616	TERB1	-1.272	0.0250931
ENSMUSG00000052736	KLRC2	-1.332	0.0049779
ENSMUSG00000052749	TRIM30B	-1.865	0.000768238
ENSMUSG00000052889	PRKCB	-1.065	0.0031583
ENSMUSG00000053044	CD8B1	-1.125	0.0218788
ENSMUSG00000053054	ADH6A	-3.447	0.0140987
ENSMUSG00000053101	GPR141	-1.256	0.0303179
ENSMUSG00000053137	MAPK11	-1.484	8.42837e-07
ENSMUSG00000053279	ALDH1A1	-3.033	0.047977
ENSMUSG00000053541	GM4759	-1.541	2.38331e-05
ENSMUSG00000053559	SMAGP	-1.473	0.000177481
ENSMUSG00000053617	SH3PXD2A	-1.514	5.10687e-06
ENSMUSG00000053646	PLXNB1	-2.783	0.00337112
ENSMUSG00000053675	TGM5	-4.763	0.0178995
ENSMUSG00000053797	KRT16	-4.372	0.0169509
ENSMUSG00000053886	SH2D4A	-3.664	0.0105096
ENSMUSG00000053957	GM12474	-1.254	0.0295696
ENSMUSG00000053963	STUM	-1.596	0.0236575
ENSMUSG00000053977	CD8A	-1.136	0.0107666
ENSMUSG00000054021	SIRT5	-1.131	0.0177272
ENSMUSG00000054046	KLK13	-4.348	0.0116226
ENSMUSG00000054072	IIGP1	-1.325	0.00793835
ENSMUSG00000054135	A430110L20RIK	-1.369	0.0129642
ENSMUSG00000054146	KRT15	-4.952	0.00244494
ENSMUSG00000054150	SYNE3	1.545	1.7549e-10
ENSMUSG00000054434	TMEM120B	-1.554	0.020616
ENSMUSG00000054435	GIMAP4	-1.078	0.00374922
ENSMUSG00000054545	UGT1A6A	-2.077	0.0136215
ENSMUSG00000054589	GM9949	-2.242	0.00115837
ENSMUSG00000054598	9130230L23RIK	-2.389	0.00761263
ENSMUSG00000054640	SLC8A1	1.012	0.0119337
ENSMUSG00000054793	CADM4	-3.577	0.00335996
ENSMUSG00000054889	DSP	-4.902	0.0014655
ENSMUSG00000054892	TXK	-1.37	0.000464307
ENSMUSG00000054910	4931415C17RIK	-1.395	0.0179967
ENSMUSG00000055069	RAB39	-1.09	0.0110601
ENSMUSG00000055210	FOXD2	1.501	0.000347021
ENSMUSG00000055320	TEAD1	-3.259	0.00940989
ENSMUSG00000055323	GM9967	-1.41	0.0199261
ENSMUSG00000055333	FAT2	-4.688	0.0326739
ENSMUSG00000055373	FUT9	-3.419	0.0157076
ENSMUSG00000055413	H2-Q5	-1.549	3.2678e-05
ENSMUSG00000055415	ATP10B	-3.193	0.0181275
ENSMUSG00000055485	SOGA1	1.279	0.0033378
ENSMUSG00000055493	EPM2A	1.493	0.0136349
ENSMUSG00000055561	SPINK5	-4.729	0.0027723
ENSMUSG00000055717	SLAIN1	-1.032	0.00119686
ENSMUSG00000055723	RRAS2	-1.157	0.000143576
ENSMUSG00000055872	GM9985	-2.041	0.0115476
ENSMUSG00000055926	GM14137	-2.399	0.0344489
ENSMUSG00000055976	CLDN23	-2.774	0.0254407
ENSMUSG00000056078	LIPM	-4.119	0.0116048
ENSMUSG00000056145	AI504432	-1.447	0.0441942
ENSMUSG00000056155	NANOS3	-2.989	0.0269801
ENSMUSG00000056203	TAS2R135	-2.619	0.00385762
ENSMUSG00000056290	MS4A4B	-1.077	0.0117006
ENSMUSG00000056367	ACTR3B	1.425	0.00685697
ENSMUSG00000056592	ZFP658	-1.299	0.00031594
ENSMUSG00000056596	TRNP1	2.952	0.00788522
ENSMUSG00000056632	DSG3	-5.914	0.00195724
ENSMUSG00000056643	CHST13	-1.576	0.0471048
ENSMUSG00000056737	CAPG	1.261	0.000905277
ENSMUSG00000056895	HIST3H2BA	-1.427	0.00300631
ENSMUSG00000056973	CES1D	-2.677	0.046746
ENSMUSG00000057058	SKAP1	-1.117	0.0140585
ENSMUSG00000057092	FXYD3	-3.429	0.0457246
ENSMUSG00000057098	EBF1	-1.237	0.00228971
ENSMUSG00000057132	RPGRIP1	-1.25	0.00201936
ENSMUSG00000057246	BC051142	-1.698	0.00194159
ENSMUSG00000057265	BBOF1	-1.656	0.000617317
ENSMUSG00000057315	ARHGAP24	-1.106	0.00610592
ENSMUSG00000057337	CHST3	-1.338	0.00282181
ENSMUSG00000057454	LYPD3	-3.347	0.0263962
ENSMUSG00000057531	DTNBP1	1.107	6.11544e-05
ENSMUSG00000057596	TRIM30D	-1.079	0.0115981
ENSMUSG00000057606	COLQ	-1.278	0.00316794
ENSMUSG00000057897	CAMK2B	2.412	1.31261e-06
ENSMUSG00000058216	GSTP3	-1.193	0.00762053
ENSMUSG00000058258	IDI1	1.047	0.0224297
ENSMUSG00000058317	UBE2E2	-2.414	0.0306713
ENSMUSG00000058354	KRT6A	-4.017	0.0069686
ENSMUSG00000058402	ZFP420	-1.136	0.000263626
ENSMUSG00000058470	GM8369	-1.286	0.00210424
ENSMUSG00000058979	HDHD5	-1.254	2.15559e-05
ENSMUSG00000059013	SH2D3C	-1.222	0.00150828
ENSMUSG00000059146	NTRK3	-1.408	0.014814
ENSMUSG00000059479	B3GNT8	-1.027	0.00824574
ENSMUSG00000059562	CCDC154	1.816	0.0345191
ENSMUSG00000059588	CALCRL	-2.189	0.0167644
ENSMUSG00000059659	GM10069	-1.449	0.0328478
ENSMUSG00000059668	KRT4	-4.936	0.000656547
ENSMUSG00000059713	RCAN3	1.051	0.000471097
ENSMUSG00000059810	RGS3	-1.296	0.000435667
ENSMUSG00000059832	KPRP	-2.771	0.0499927
ENSMUSG00000059898	DSC3	-6.538	0.00516881
ENSMUSG00000059901	ADAMTS14	-1.208	0.0360944
ENSMUSG00000059994	FCRL1	-1.176	0.00678971
ENSMUSG00000060131	ATP8B4	-1.226	0.00489782
ENSMUSG00000060227	CASC4	1.083	0.0107183
ENSMUSG00000060301	2610008E11RIK	-1.126	0.000263626
ENSMUSG00000060429	SNTB1	-1.273	0.0374889
ENSMUSG00000060445	SYCP2	-2.398	0.00484109
ENSMUSG00000060550	H2-Q7	-1.326	2.06134e-05
ENSMUSG00000060675	PLA2G16	-2.637	0.0471431
ENSMUSG00000060716	PLEKHH1	-2.356	0.0204769
ENSMUSG00000060733	IPMK	1.162	0.000739774
ENSMUSG00000061048	CDH3	-5.816	0.0128455
ENSMUSG00000061259	TMPRSS11D	-4.533	0.0192338
ENSMUSG00000061356	NUGGC	-2.047	0.0246871
ENSMUSG00000061414	CRACR2A	-1.432	0.000176784
ENSMUSG00000061527	KRT5	-6.474	0.00121413
ENSMUSG00000061577	ADGRG5	-1.489	0.000134145
ENSMUSG00000061740	CYP2D22	-1.309	0.00161295
ENSMUSG00000061769	KLRA6	-1.152	0.0194059
ENSMUSG00000061859	PATJ	-1.372	2.20834e-06
ENSMUSG00000061981	FLOT2	1.157	0.0242625
ENSMUSG00000062082	CD200R4	1.909	0.000142639
ENSMUSG00000062157	IFNLR1	-1.755	0.00649987
ENSMUSG00000062190	LANCL2	1.15	8.89046e-06
ENSMUSG00000062312	ERBB2	-4.409	0.0102069
ENSMUSG00000062373	TMEM65	-1.162	0.000762416
ENSMUSG00000062488	IFIT3B	-1.566	0.0127725
ENSMUSG00000062609	KCNJ15	-3.706	0.0487637
ENSMUSG00000062826	CES2F	-2.457	0.0494864
ENSMUSG00000062866	PHACTR2	-1.003	0.0256169
ENSMUSG00000062931	ZFP938	-1.137	0.0143478
ENSMUSG00000063011	MSLN	-3.717	0.0204769
ENSMUSG00000063130	CALML3	-3.24	0.00872025
ENSMUSG00000063430	WSCD2	-1.267	0.00574389
ENSMUSG00000063564	COL23A1	-1.286	0.00227858
ENSMUSG00000063646	JAKMIP1	-1.268	6.25339e-05
ENSMUSG00000063651	CNFN	-3.76	0.0104413
ENSMUSG00000063652	SLC22A21	-1.193	0.0417353
ENSMUSG00000063767	S100A7A	-2.97	0.0245119
ENSMUSG00000063889	CREM	1.262	0.000138954
ENSMUSG00000064023	KLK8	-1.26	0.00241895
ENSMUSG00000064065	IPCEF1	-1.31	0.00363476
ENSMUSG00000064147	RAB44	2.056	0.0156419
ENSMUSG00000064262	GIMAP8	-1.183	0.000522096
ENSMUSG00000064280	CCDC146	-1.971	0.0354976
ENSMUSG00000064491	GM22061	-1.932	0.00742316
ENSMUSG00000064492	GM22060	-1.408	0.0228621
ENSMUSG00000064859	GM24524	-1.847	0.00907288
ENSMUSG00000064936	GM23722	-1.529	0.0452912
ENSMUSG00000065158	GM25483	-1.221	0.0366726
ENSMUSG00000065808	GM23037	-1.366	0.0213866
ENSMUSG00000066043	PHACTR4	1.268	6.47682e-10
ENSMUSG00000066197	GPR139	3.188	0.0101364
ENSMUSG00000066357	WDR6	1.006	0.00093209
ENSMUSG00000066442	MTHFS	-1.112	0.00255586
ENSMUSG00000066456	HMGN3	-1.285	0.00366765
ENSMUSG00000066571	4931406P16RIK	1.106	1.30903e-05
ENSMUSG00000066677	IFI208	-1.154	0.0290547
ENSMUSG00000066682	PILRB2	-1.167	0.0318211
ENSMUSG00000066684	PILRB1	-1.155	0.0465955
ENSMUSG00000066687	ZBTB16	-1.003	0.00841955
ENSMUSG00000067001	SERPINB7	-2.256	0.000107787
ENSMUSG00000067220	CNGA1	-1.297	0.0316511
ENSMUSG00000067235	H2-Q10	-1.91	0.00444644
ENSMUSG00000067336	BMPR2	1.306	0.00444644
ENSMUSG00000067577	A430093F15RIK	-1.436	0.00199981
ENSMUSG00000067616	KLK11	-3.63	0.00848595
ENSMUSG00000067629	SYNGAP1	1.397	0.00224144
ENSMUSG00000067889	SPTBN2	-4.179	0.00224144
ENSMUSG00000068036	AFDN	-1.273	0.0140805
ENSMUSG00000068105	TNFRSF13C	-1.313	0.00149066
ENSMUSG00000068129	CST7	1.687	3.66807e-05
ENSMUSG00000068267	CENPB	1.016	0.00733017
ENSMUSG00000068452	DUOX2	-2.588	0.0421489
ENSMUSG00000069114	ZBTB10	-1.219	0.00155607
ENSMUSG00000069456	RDH16	-3.666	0.00480225
ENSMUSG00000069893	9930111J21RIK1	-1.163	0.00324433
ENSMUSG00000070047	FAT1	-3.062	0.0140191
ENSMUSG00000070291	DDX43	-1.306	0.0293571
ENSMUSG00000070304	SCN2B	-1.271	0.0148551
ENSMUSG00000070305	MPZL3	-1.884	0.000110413
ENSMUSG00000070407	HS3ST3B1	-1.067	0.0103689
ENSMUSG00000070425	XNTRPC	-1.624	0.0367565
ENSMUSG00000070501	IFI214	-1.678	0.000100114
ENSMUSG00000070730	RMDN3	1.254	8.42837e-07
ENSMUSG00000070873	LILRA5	-1.024	0.0457057
ENSMUSG00000070880	GAD1	-2.294	0.0413731
ENSMUSG00000070891	GM12689	-1.399	0.0191806
ENSMUSG00000070942	IL1RL2	1.091	0.0435977
ENSMUSG00000071042	RASGRP3	-1.28	0.000125122
ENSMUSG00000071064	ZFP827	-1.571	0.0138268
ENSMUSG00000071103	1700029J07RIK	-1.432	0.000188722
ENSMUSG00000071229	TIMM8A2	-1.695	0.020857
ENSMUSG00000071561	BC100530	-3.098	0.0255232
ENSMUSG00000071648	ROM1	1.187	0.00783596
ENSMUSG00000071713	CSF2RB	2.235	0.0049966
ENSMUSG00000071714	CSF2RB2	2.634	0.000612476
ENSMUSG00000071716	APOL7E	-1.257	0.0031059
ENSMUSG00000071855	CCDC112	1.65	5.30242e-05
ENSMUSG00000071856	MCC	-3.017	0.00609599
ENSMUSG00000072109	A530040E14RIK	-1.316	0.00363476
ENSMUSG00000072294	KLF12	-1.304	0.0018079
ENSMUSG00000072568	FAM84B	-1.111	0.00084008
ENSMUSG00000072572	SLC39A2	-1.408	0.00472631
ENSMUSG00000072618	GM10384	1.978	0.00130882
ENSMUSG00000072621	SLFN10-PS	1.447	3.22091e-06
ENSMUSG00000072663	SPEF2	-1.125	0.00500716
ENSMUSG00000072721	KLRA14-PS	-2.409	0.0212417
ENSMUSG00000072723	GM10044	-1.469	0.00483437
ENSMUSG00000072769	GM10419	-2.786	0.0410654
ENSMUSG00000072825	CEP170B	-1.209	0.00599075
ENSMUSG00000072845	TMPRSS11A	-4.826	0.00353337
ENSMUSG00000072949	ACOT1	3.575	0.012952
ENSMUSG00000073008	GPR174	-1.191	0.00399949
ENSMUSG00000073274	GM14636	-2.005	0.0159566
ENSMUSG00000073409	H2-Q6	-1.322	4.82209e-05
ENSMUSG00000073471	RSPH3A	1.623	3.30753e-05
ENSMUSG00000073491	IFI213	-1.613	0.00160698
ENSMUSG00000073492	GM10521	-1.03	0.00900066
ENSMUSG00000073538	E330020D12RIK	1.469	0.00841955
ENSMUSG00000073628	GM10552	-1.601	0.000658574
ENSMUSG00000073678	PGAP1	-1.236	0.00538334
ENSMUSG00000073728	TMEM51OS1	-1.545	0.00802711
ENSMUSG00000073739	GM16287	1.762	0.00384761
ENSMUSG00000073843	GM12542	-2.887	0.0419226
ENSMUSG00000073902	GM1966	-1.025	0.0153841
ENSMUSG00000073968	TRIM68	-1.26	0.000244625
ENSMUSG00000074006	OMP	-2.777	0.000238585
ENSMUSG00000074071	FAM169B	-1.576	1.95375e-06
ENSMUSG00000074151	NLRC5	-1.217	0.000578418
ENSMUSG00000074196	CLCA4C-PS	-2.915	0.0215314
ENSMUSG00000074207	ADH1	-3.608	0.00366228
ENSMUSG00000074218	COX7A1	1.755	0.00475121
ENSMUSG00000074272	CEACAM1	-2.079	0.0100181
ENSMUSG00000074340	OVGP1	-1.226	0.00196169
ENSMUSG00000074364	EHD2	1.889	0.000420925
ENSMUSG00000074419	GM15448	-1.324	0.0140193
ENSMUSG00000074445	SPRR2A3	-6.807	0.0253944
ENSMUSG00000074489	BGLAP3	-3.438	0.0123584
ENSMUSG00000074497	A430078G23RIK	-1.093	0.00180161
ENSMUSG00000074577	RIPOR3	-2.009	0.0425284
ENSMUSG00000074604	MGST2	-1.379	0.00222085
ENSMUSG00000074625	ARHGAP40	-3.602	0.00513242
ENSMUSG00000074629	4930518I15RIK	-1.292	0.0141448
ENSMUSG00000074682	ZCCHC3	1.109	0.00353337
ENSMUSG00000074783	AU019990	-1.912	0.00745901
ENSMUSG00000074892	B3GALT5	-2.906	0.0420521
ENSMUSG00000074896	IFIT3	-1.169	0.0107692
ENSMUSG00000074923	PAK6	1.663	0.0231298
ENSMUSG00000075122	CD80	-1.693	0.00499016
ENSMUSG00000075289	CARNS1	-1.128	0.00207031
ENSMUSG00000075296	ALDH3B2	-3.336	0.0143765
ENSMUSG00000075463	4930594M22RIK	-1.613	0.00650849
ENSMUSG00000075569	RSPH10B	-2.051	0.00344014
ENSMUSG00000075592	NYNRIN	1.52	0.0100586
ENSMUSG00000075602	LY6A	-1.902	0.021602
ENSMUSG00000075703	SELENOI	1.096	5.53752e-07
ENSMUSG00000076431	SOX4	-1.048	0.0107709
ENSMUSG00000076433	CEP295NL	-2.954	2.69313e-06
ENSMUSG00000076461	TRBV1	-1.056	0.0446488
ENSMUSG00000076469	TRBV13-2	1.16	0.0139514
ENSMUSG00000076473	TRBV16	-1.021	0.0295061
ENSMUSG00000076476	TRBV20	-1.152	0.0385444
ENSMUSG00000076479	TRBV26	-1.347	0.0432316
ENSMUSG00000076480	TRBV29	-1.146	0.0148339
ENSMUSG00000076483	TRBJ1-1	-1.612	0.00404779
ENSMUSG00000076484	TRBJ1-2	-1.459	0.0108387
ENSMUSG00000076485	TRBJ1-3	-1.604	0.000668051
ENSMUSG00000076486	TRBJ1-4	-1.377	0.030044
ENSMUSG00000076487	TRBJ1-5	-2.262	0.000147806
ENSMUSG00000076488	TRBJ1-6	-1.46	0.0197619
ENSMUSG00000076489	TRBJ1-7	-1.78	0.0066325
ENSMUSG00000076490	TRBC1	-1.138	0.0100475
ENSMUSG00000076493	TRBJ2-2	-1.47	0.0203631
ENSMUSG00000076494	TRBJ2-3	-1.432	0.0103111
ENSMUSG00000076495	TRBJ2-4	-1.749	0.00442648
ENSMUSG00000076496	TRBJ2-5	-1.763	0.00155642
ENSMUSG00000076497	TRBJ2-7	-1.414	0.00590374
ENSMUSG00000076498	TRBC2	-1.007	0.0312348
ENSMUSG00000076499	TRBV31	-1.189	0.0226761
ENSMUSG00000076518	IGKV2-112	-1.308	0.033942
ENSMUSG00000076531	IGKV4-92	-1.672	0.0255059
ENSMUSG00000076532	IGKV4-91	-1.324	0.00719667
ENSMUSG00000076534	IGKV12-89	-2.01	0.0160819
ENSMUSG00000076535	IGKV1-88	-1.472	0.0193117
ENSMUSG00000076536	IGKV4-86	-1.447	0.0119432
ENSMUSG00000076540	IGKV4-80	-1.683	0.00947858
ENSMUSG00000076549	IGKV4-68	-1.279	0.025021
ENSMUSG00000076550	IGKV4-63	-1.654	0.00212895
ENSMUSG00000076552	IGKV4-61	-1.513	0.0201403
ENSMUSG00000076555	IGKV4-57-1	-1.432	0.0104371
ENSMUSG00000076569	IGKV5-39	-1.361	0.00484109
ENSMUSG00000076570	IGKV12-38	-1.609	0.0151243
ENSMUSG00000076576	IGKV6-32	-1.096	0.0401257
ENSMUSG00000076577	IGKV8-30	-1.081	0.0454203
ENSMUSG00000076580	IGKV8-27	-1.09	0.0400588
ENSMUSG00000076583	IGKV8-24	-1.096	0.0329549
ENSMUSG00000076586	IGKV8-21	-1.067	0.0437675
ENSMUSG00000076587	IGKV6-20	-1.355	0.0113189
ENSMUSG00000076594	IGKV6-13	-1.245	0.0259468
ENSMUSG00000076596	IGKV3-10	-1.197	0.0299153
ENSMUSG00000076604	IGKJ1	-1.341	0.00912879
ENSMUSG00000076605	IGKJ2	-1.476	0.00302823
ENSMUSG00000076606	IGKJ3	-2.358	0.000219534
ENSMUSG00000076607	IGKJ4	-1.671	0.00270577
ENSMUSG00000076608	IGKJ5	-1.793	0.00151404
ENSMUSG00000076609	IGKC	-1.048	0.0418092
ENSMUSG00000076615	IGHG3	-1.482	0.00282396
ENSMUSG00000076617	IGHM	-1.097	0.0398834
ENSMUSG00000076618	IGHJ4	-1.894	3.17675e-05
ENSMUSG00000076619	IGHJ3	-1.683	0.00332137
ENSMUSG00000076620	IGHJ2	-1.556	0.00098992
ENSMUSG00000076621	IGHJ1	-1.458	0.000239389
ENSMUSG00000076665	IGHV7-1	-1.504	0.0231298
ENSMUSG00000076666	IGHV14-4	-1.718	0.00175227
ENSMUSG00000076672	IGHV3-6	-1.153	0.0127547
ENSMUSG00000076674	IGHV3-8	-1.13	0.0301107
ENSMUSG00000076676	IGHV12-3	-1.239	0.0170149
ENSMUSG00000076688	IGHV15-2	-1.474	0.0251201
ENSMUSG00000076893	TRAJ37	-1.966	0.00341265
ENSMUSG00000076901	TRAJ28	-1.973	0.0030217
ENSMUSG00000076903	TRAJ26	-1.612	0.0116787
ENSMUSG00000076905	TRAJ24	-1.888	0.0055615
ENSMUSG00000076906	TRAJ23	-1.664	0.00678971
ENSMUSG00000076908	TRAJ21	-1.682	0.0401027
ENSMUSG00000076910	TRAJ19	-2.395	0.00119383
ENSMUSG00000076911	TRAJ18	-2.161	0.000544696
ENSMUSG00000076914	TRAJ15	-1.565	0.0073369
ENSMUSG00000076915	TRAJ14	-1.697	0.0351818
ENSMUSG00000076917	TRAJ12	-1.469	0.0198026
ENSMUSG00000076918	TRAJ11	-2.157	0.00325793
ENSMUSG00000076919	TRAJ9	-1.595	0.0369349
ENSMUSG00000076921	TRAJ7	-1.437	0.0361282
ENSMUSG00000076922	TRAJ6	-1.361	0.0480782
ENSMUSG00000076925	TRAJ3	-2.025	0.00722979
ENSMUSG00000076926	TRAJ2	-2.077	0.00142858
ENSMUSG00000076934	IGLV1	-1.223	0.0107709
ENSMUSG00000076937	IGLC2	-1.321	0.00178435
ENSMUSG00000076939	IGLV3	-1.528	0.00101182
ENSMUSG00000076940	IGLV2	-1.138	0.0368321
ENSMUSG00000078122	F630028O10RIK	-2.073	0.000228642
ENSMUSG00000078143	GM17344	-1.755	0.0288723
ENSMUSG00000078153	PSME2B	-1.184	3.17411e-06
ENSMUSG00000078247	AIRN	-2.16	2.57957e-05
ENSMUSG00000078490	CFAP74	-1.589	0.0178657
ENSMUSG00000078597	CYP4A12B	-3.918	0.0127449
ENSMUSG00000078606	GM4070	-1.236	0.00127132
ENSMUSG00000078607	1810010H24RIK	2.909	1.4727e-06
ENSMUSG00000078612	FYB2	3.604	0.0434025
ENSMUSG00000078635	1700028N14RIK	-2.04	2.61173e-05
ENSMUSG00000078817	NLRP12	-2.127	0.00942223
ENSMUSG00000078963	HSBP1L1	-3.313	0.00651436
ENSMUSG00000079019	INSL3	-1.34	0.0176076
ENSMUSG00000079038	D130040H23RIK	-1.145	0.0120001
ENSMUSG00000079071	GM14085	-2.253	9.02365e-05
ENSMUSG00000079164	TLR5	-2.074	0.00403538
ENSMUSG00000079339	IFIT1BL1	-2.391	0.00531448
ENSMUSG00000079363	GBP4	-1.695	6.3986e-09
ENSMUSG00000079451	TMPRSS11G	-3.214	0.0143008
ENSMUSG00000079455	GM16026	-1.586	0.000312322
ENSMUSG00000079457	GM7609	-2.382	0.000339708
ENSMUSG00000079484	PHYHD1	-1.596	0.000651488
ENSMUSG00000079620	MUC4	-3.537	0.00675335
ENSMUSG00000079654	PRRT4	2.53	0.0174776
ENSMUSG00000079659	TMEM243	-1.188	3.96123e-05
[truncated: 523 more rows]

## Sheet: Table S7 Early Events
	Table S7 Early Events
[truncated: 306 more rows]

## Sheet: Table S8 Transition Events
Table S8 Transition Events
[truncated: 1,168 more rows]

[truncated: 7 more sheets: Table S9 Persistent Events, Table S10 Leukemia, Table S11 Early Events, Table S12 Transition Events, Table S13 Persistent Events, Table S14 Leukemic Events, Table S15 Top 1% Eigengenes]
